# Supplementary material for: A novel proteomics-based plasma test for early detection of multiple cancers in the general population
Source: bioRxiv or medRxiv preprint supplement (doi:10.1101/2023.05.06.23289613), 2023-05-08
Supplement: Supplementary file [file media-1.pdf]

## **Materials and Methods**

### ***1. Study Design***

We collected plasma samples from 440 patients diagnosed with 18 distinct types of cancer, as well as from healthy individuals (Fig S1). We focused on early-stage common solid tumours where early detection followed by medical/surgical treatment can significantly enhance the survival of the patients. Then, we used Olink's Proximity Extension Assay technology to measure proteins in the plasma samples. Using the machine learning approaches, we identified protein biomarkers for detection of cancer as well as identification of the site of origin of the cancer.

### ***2. Sample Collection***

The EDTA plasma samples used in this analysis were provided by the Ukraine Association of Biobank (UAB). (21) A summary of the number and type of samples is outlined in Table S1. The UAB was established in 2017 with the goal of growing and developing the biobank network across Ukraine. The network encompasses biobanks from the main Institutes of Medical Sciences in the country and operates under the guidance of the ESBB, ISBER, and NCI guidelines. The UAB has established policies and necessary documents such as the Patient Consent Policy, Patient Information Sheet, Biobank Consent Form, and Sample Application Form to ensure ethical and transparent operations in medical institutions and hospitals. UAB places a strong emphasis on maintaining the highest ethical standards in its operations and has implemented strict bioethical policies and state-of-the-art procedures. The anonymity of donors is protected, and they are fully informed about the purpose of medical research and the potential benefits of scientific discoveries through legal consent documentation. All specimens are obtained with the fully informed and signed consent of donors. Every specimen collected by the UAB is processed following a rigorous Standard Operating Procedure (SOP). Quality control is conducted on all collected tissue samples, and the specimens are handled with utmost care and precision from the time of excision to storage and shipment to ensure that the customers receive only the highest quality specimens.

### ***3. Protein Measurement***

The protein levels in plasma were determined by utilizing the Olink® Explore 3072 technology. A full description of Olink's Proximity Extension Assay (PEA) technology has been reported elsewhere. The list of the proteins measured, and their characteristics are provided in the Table S2.

Briefly, this technology employs antibody-based detection to assess the levels of 3,072 target proteins in plasma. The antibodies were each conjugated with two complementary probes and divided into four separate 384-plex panels. Each panel included three control assays for quality control purposes (interleukin-6 (IL6), interleukin-8 (CXCL8), and tumour necrosis factor (TNF)). The process began with an overnight incubation to allow the conjugated antibodies to bind to the target proteins in the samples. This was followed by an extension and pre-amplification step, where the hybridization and extension of the complementary probes took place. The extended DNA was then amplified through PCR and indexed to prepare the libraries, which were sequenced using the Illumina NovaSeq platform. The counts obtained from the sequencing were subject to a quality control and normalization procedure, which involved the

use of internal controls to reduce intra-assay variability. These included an incubation control consisting of a non-human antigen, an extension control consisting of a unique pair of probes, and an amplification control consisting of a double-stranded DNA sequence. Additionally, external controls such as a negative control (buffer sample) and plate controls (pool of plasma) were used to determine the limit of detection and adjust levels between plates, respectively. Finally, two known samples were used as sample controls to calculate the precision of the measurements. After quality control and normalization, the data was provided in a Normalized Protein eXpression (NPX) unit, which is on a log<sub>2</sub> scale and indicates a high protein level with a high NPX value.

The analytical performance of Olink's panels has been carefully validated for sensitivity, dynamic range, specificity, precision, and scalability (Table S2). Analytical measuring range was defined by the lower limit of quantification (LLOQ) and upper limit of quantification (ULOQ) and reported in pg/mL. The high dose hook effect (a state of antigen excess relative to the reagent antibodies resulting in falsely lower values) has also been determined for each analyte. All assays have been thoroughly validated for precision (repeatability and reproducibility). Intra-assay variation (within-run) has been calculated as the mean CV for 6 individual samples, within each of 7 separate runs during the validation studies. Inter-assay variation (between-runs) was calculated as the mean CV, for the same 6 individual samples, among 7 separate runs during the validation studies.

#### ***4. Biomarker Discovery***

We transformed each problem into a binary classification one. For the pan-cancer detection problem, the positive class encompassed all cancer samples, and the control class included normal samples. For the localization of each cancer, the samples of that specific cancer were considered positive cases, while other cancer samples were considered negative cases.

We employed Logistic Regression with an L1 penalty to identify a sparse set of informative biomarkers. Each protein was standardized to zero mean and unit standard deviation to ensure comparable coefficients. The strength of the L1 penalty was determined using stratified 5-fold cross-validation on a logarithmic scale ranging from 1e-4 to 1e4. The desired number of biomarkers was then selected based on the magnitude of their absolute coefficients. The pre-processing and modelling were carried out using the Scikit-learn Python library. (22)

After identifying the biomarkers, linear classifiers were trained on the training data utilizing the selected biomarkers. In the pan-cancer detection component, the predicted probability for each sample is compared to a threshold to determine whether it is normal or cancerous. The threshold is set to attain the desired level of specificity. The positive samples from the detection component then proceed to the localization component, which consists of one model for each type of cancer. The sample is assigned to the class with the highest predicted probability. For data visualization, we used matplotlib (version 3.6.0), (23) seaborn (version 0.12.0), (24) and plotly (version 5.10.0). (25) Pre-processing and modelling were performed in Python (version 3.9.13), using scikit-learn (version 1.1.2), (22) pandas (version 1.4.4), (26) numpy (version 1.23.3), (27) and statsmodels (version 0.13.2). (28)

#### ***5. Biomarker Validation***

After biomarkers selection and to maximize the use of data in our training models, we used the leave-one-out method as our evaluation method. In this approach, the number of folds equals the

number of instances in the data set. We applied the learning algorithm once for each instance, using all other instances as a training set and using the selected instance as a single-item test set.

Fig S1. Biomarker discovery workflow for early-stage cancers.

## Biomarker discovery workflow for early-stage cancers

### 1 Study design

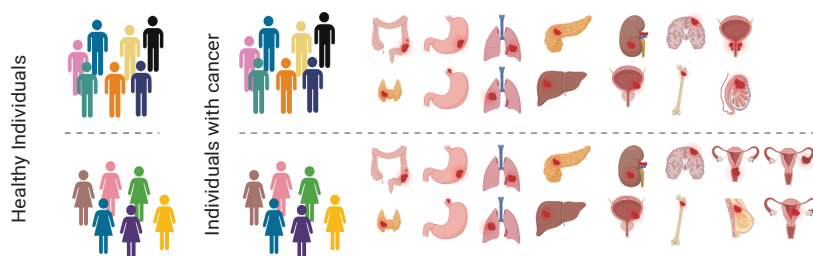

### 2 Sample collection

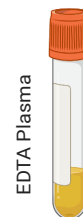

### 3 Proximity Extension Assay

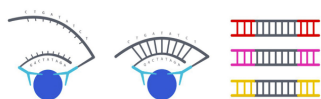

### 4 Biomarker Identification

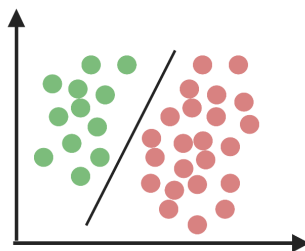

### 5 Biomarker Validation

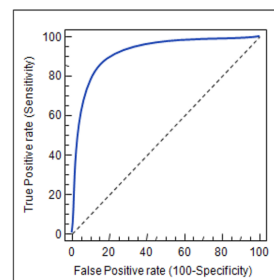

Fig S2. Distribution of proteins of the detection panel in tumour and normal plasma samples among males (a) and females (b).

a.

Male

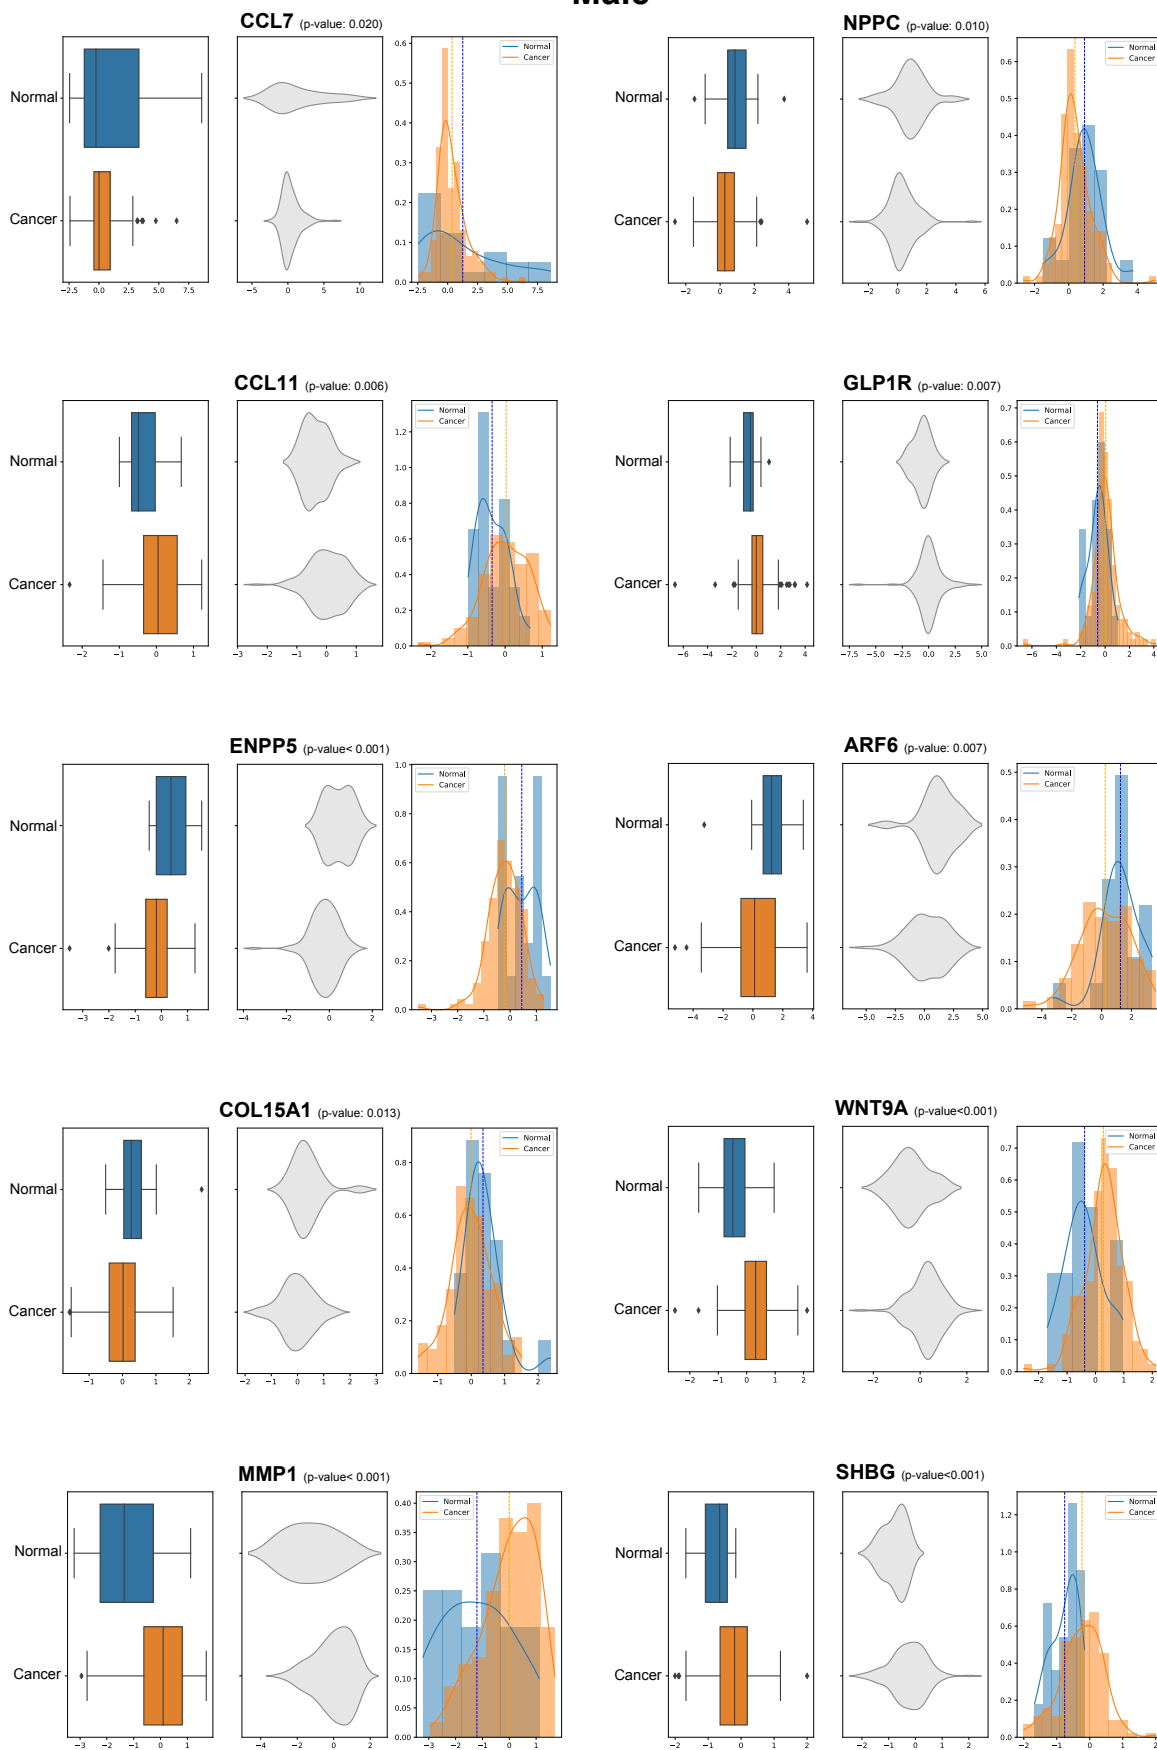

**b.**

**Female**

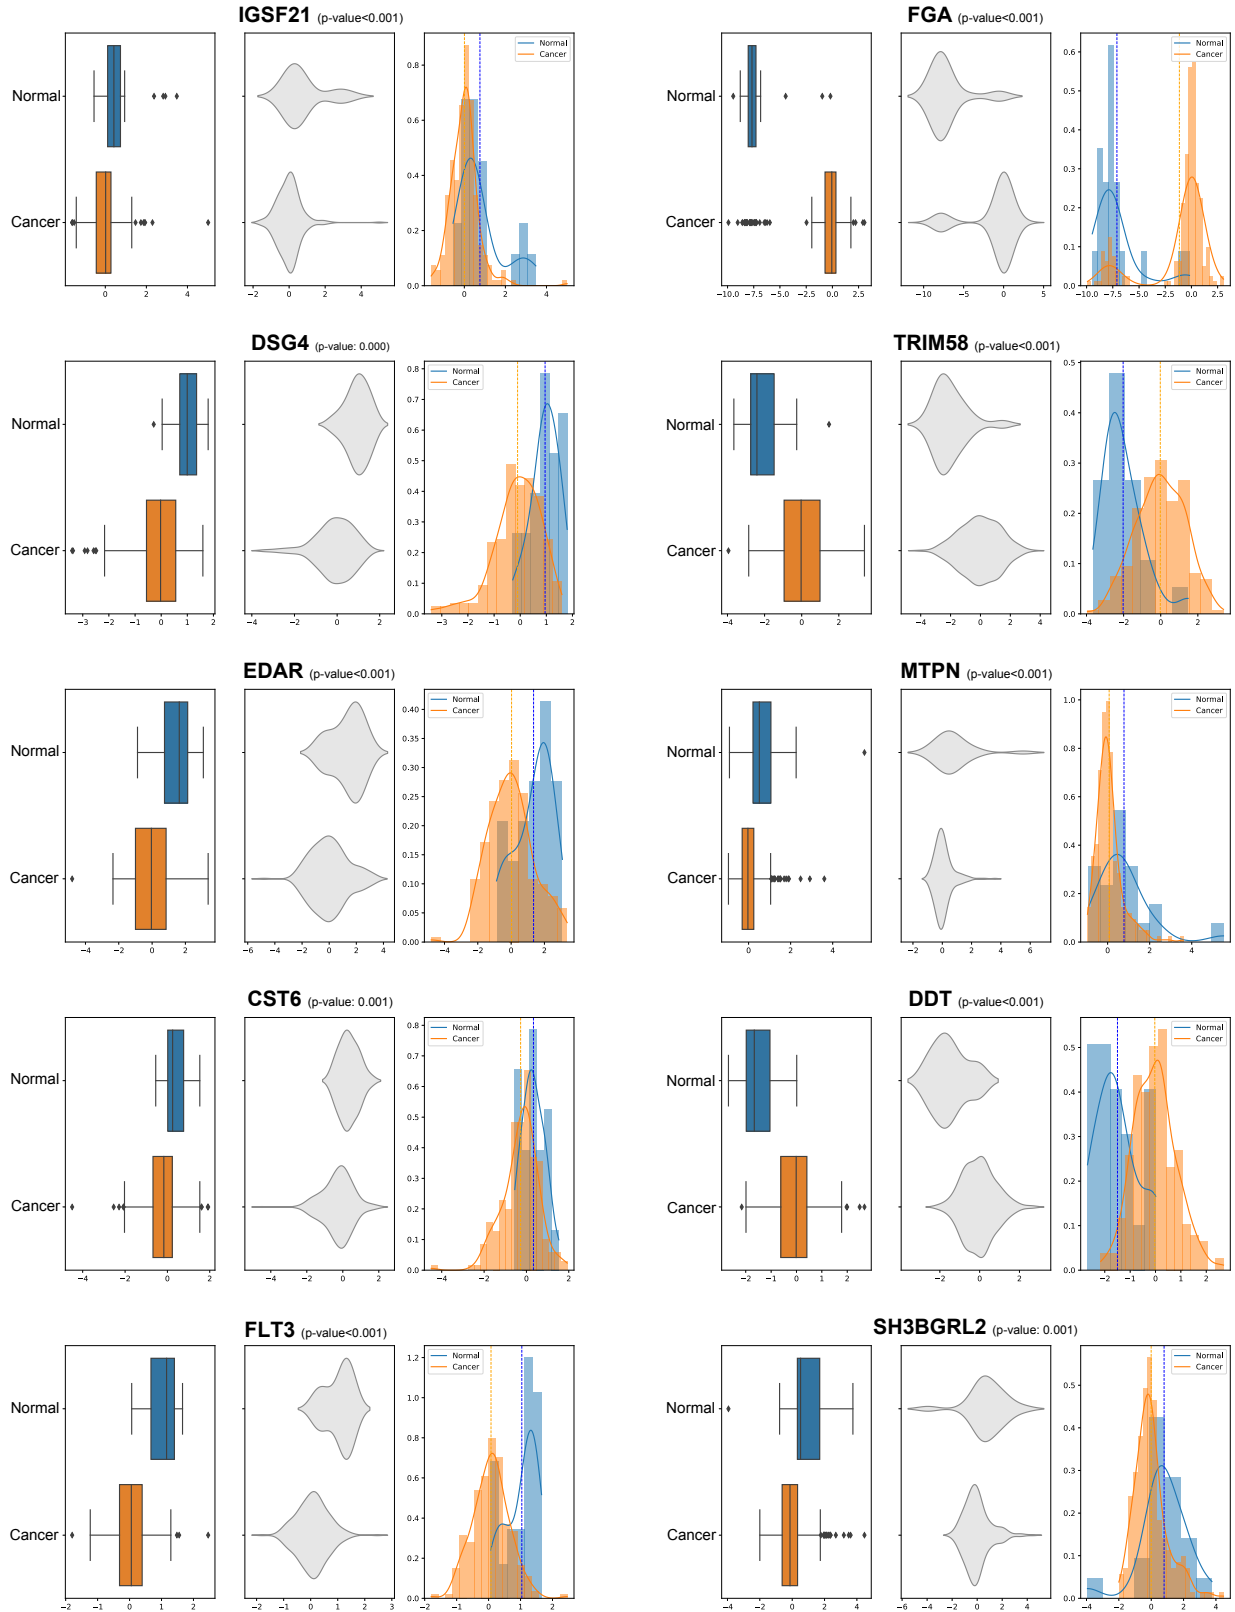

Fig S3. The performance of the detection panel for unseen cancers among males (a) and females (b).

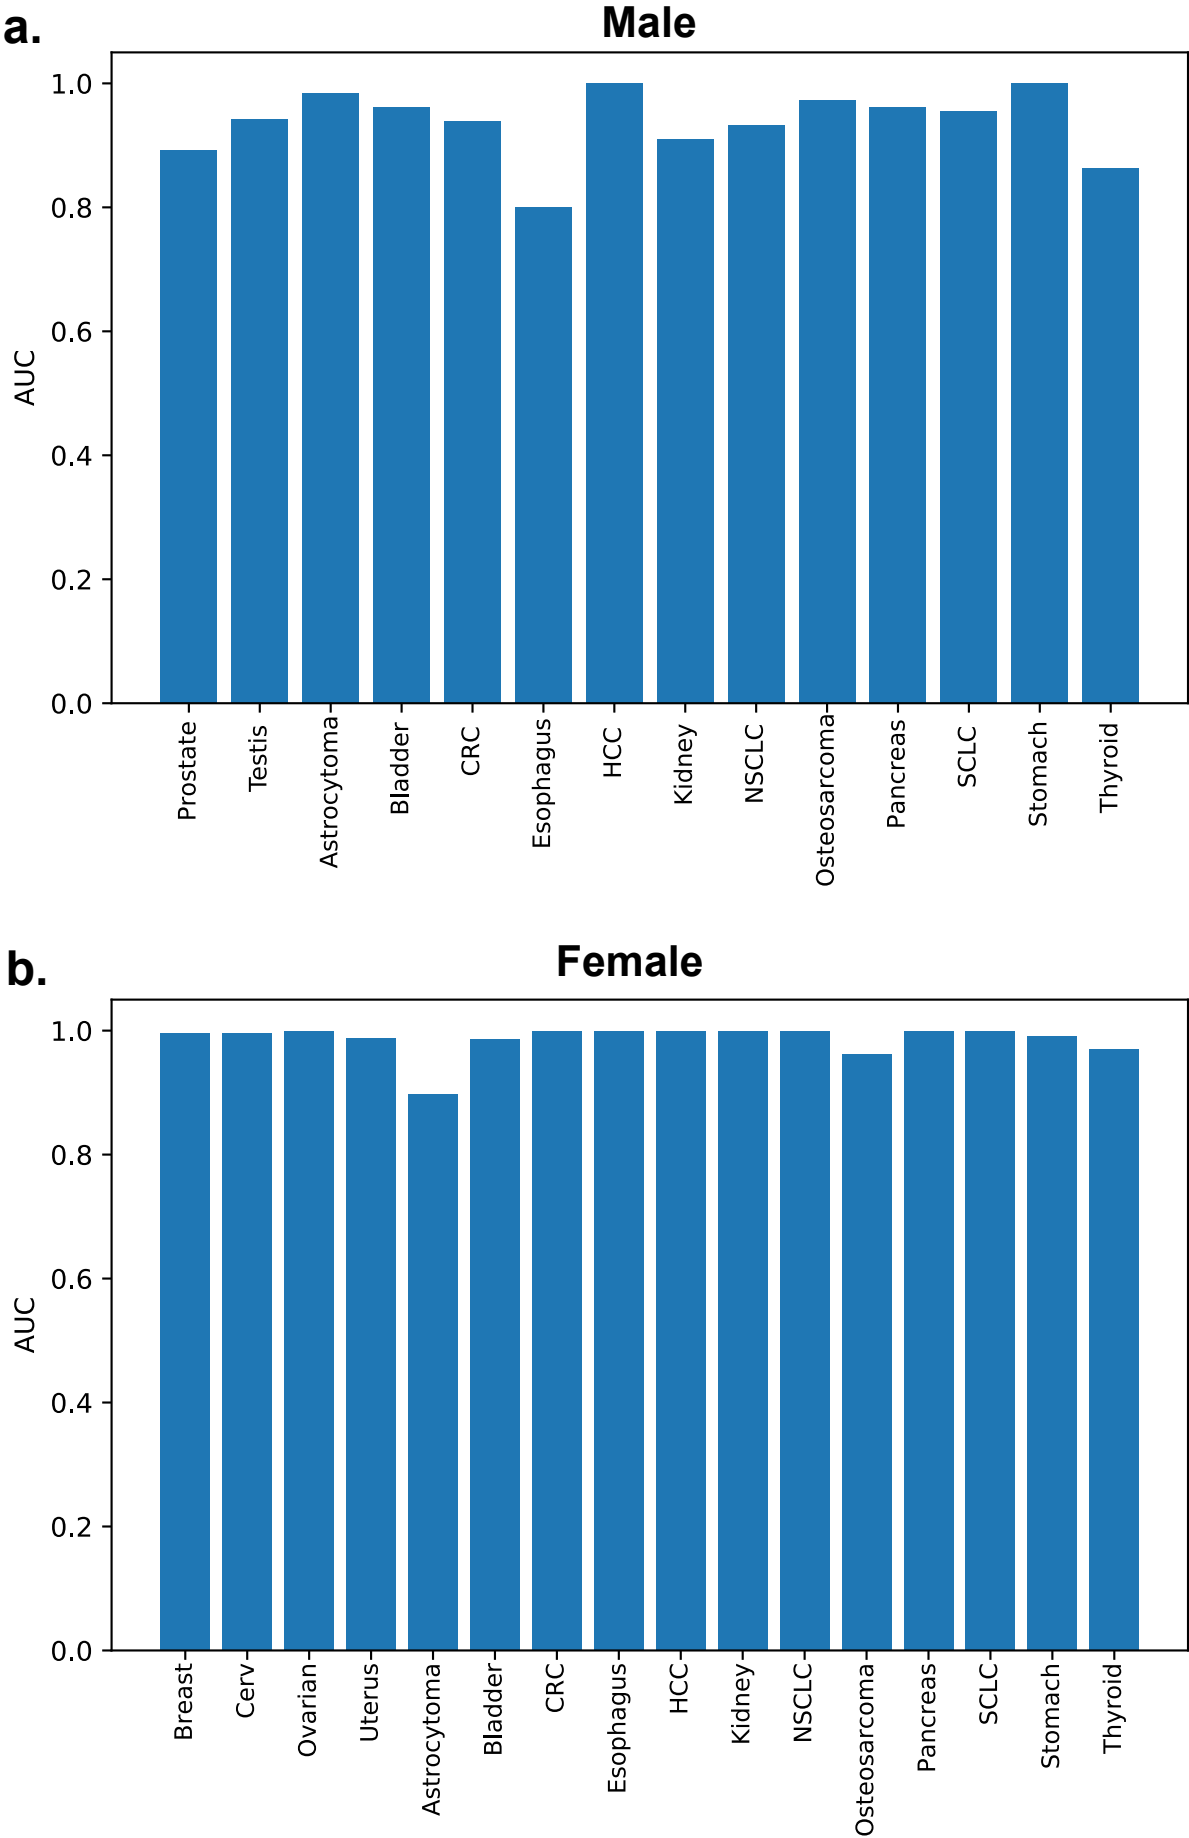

Fig S4. ROC curve (receiver operating characteristic curve) of localization panels by cancer for males (a) and females (b).

a.

Male

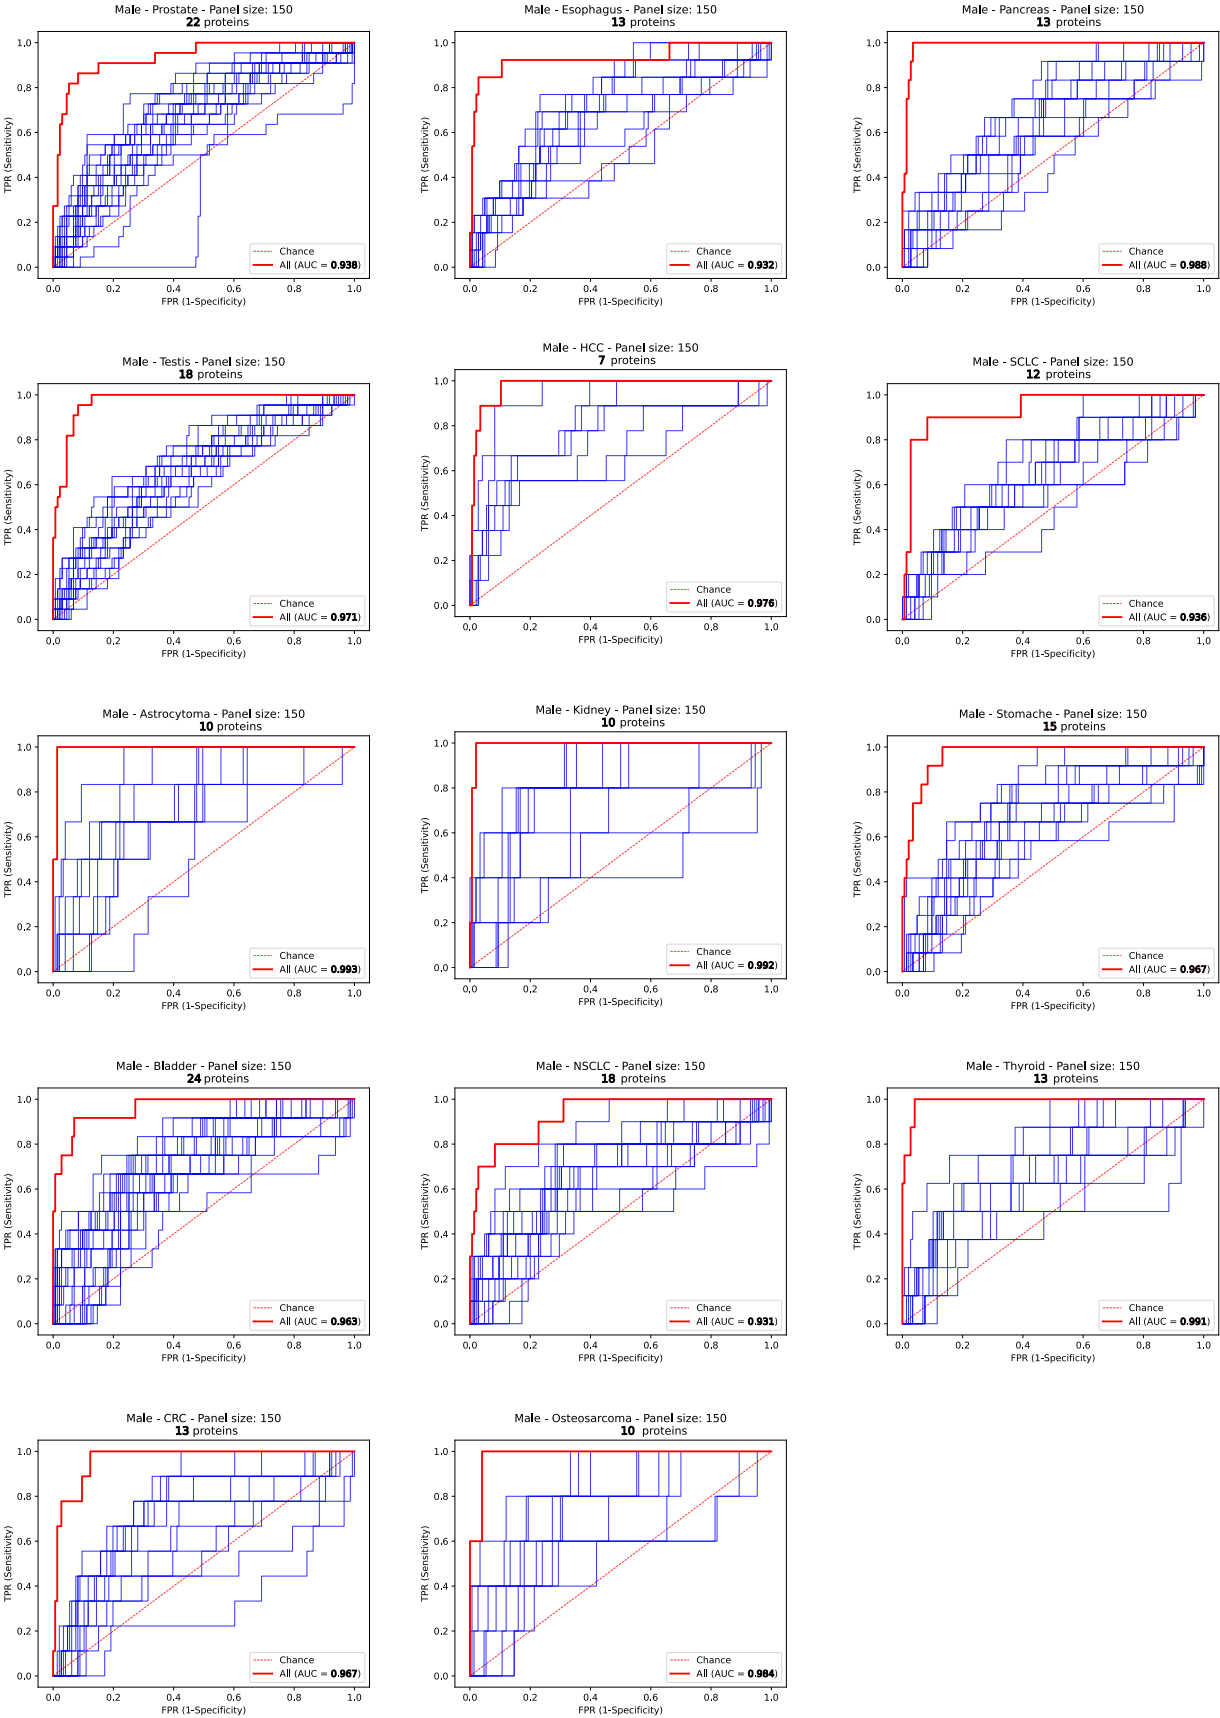



b.

# Female

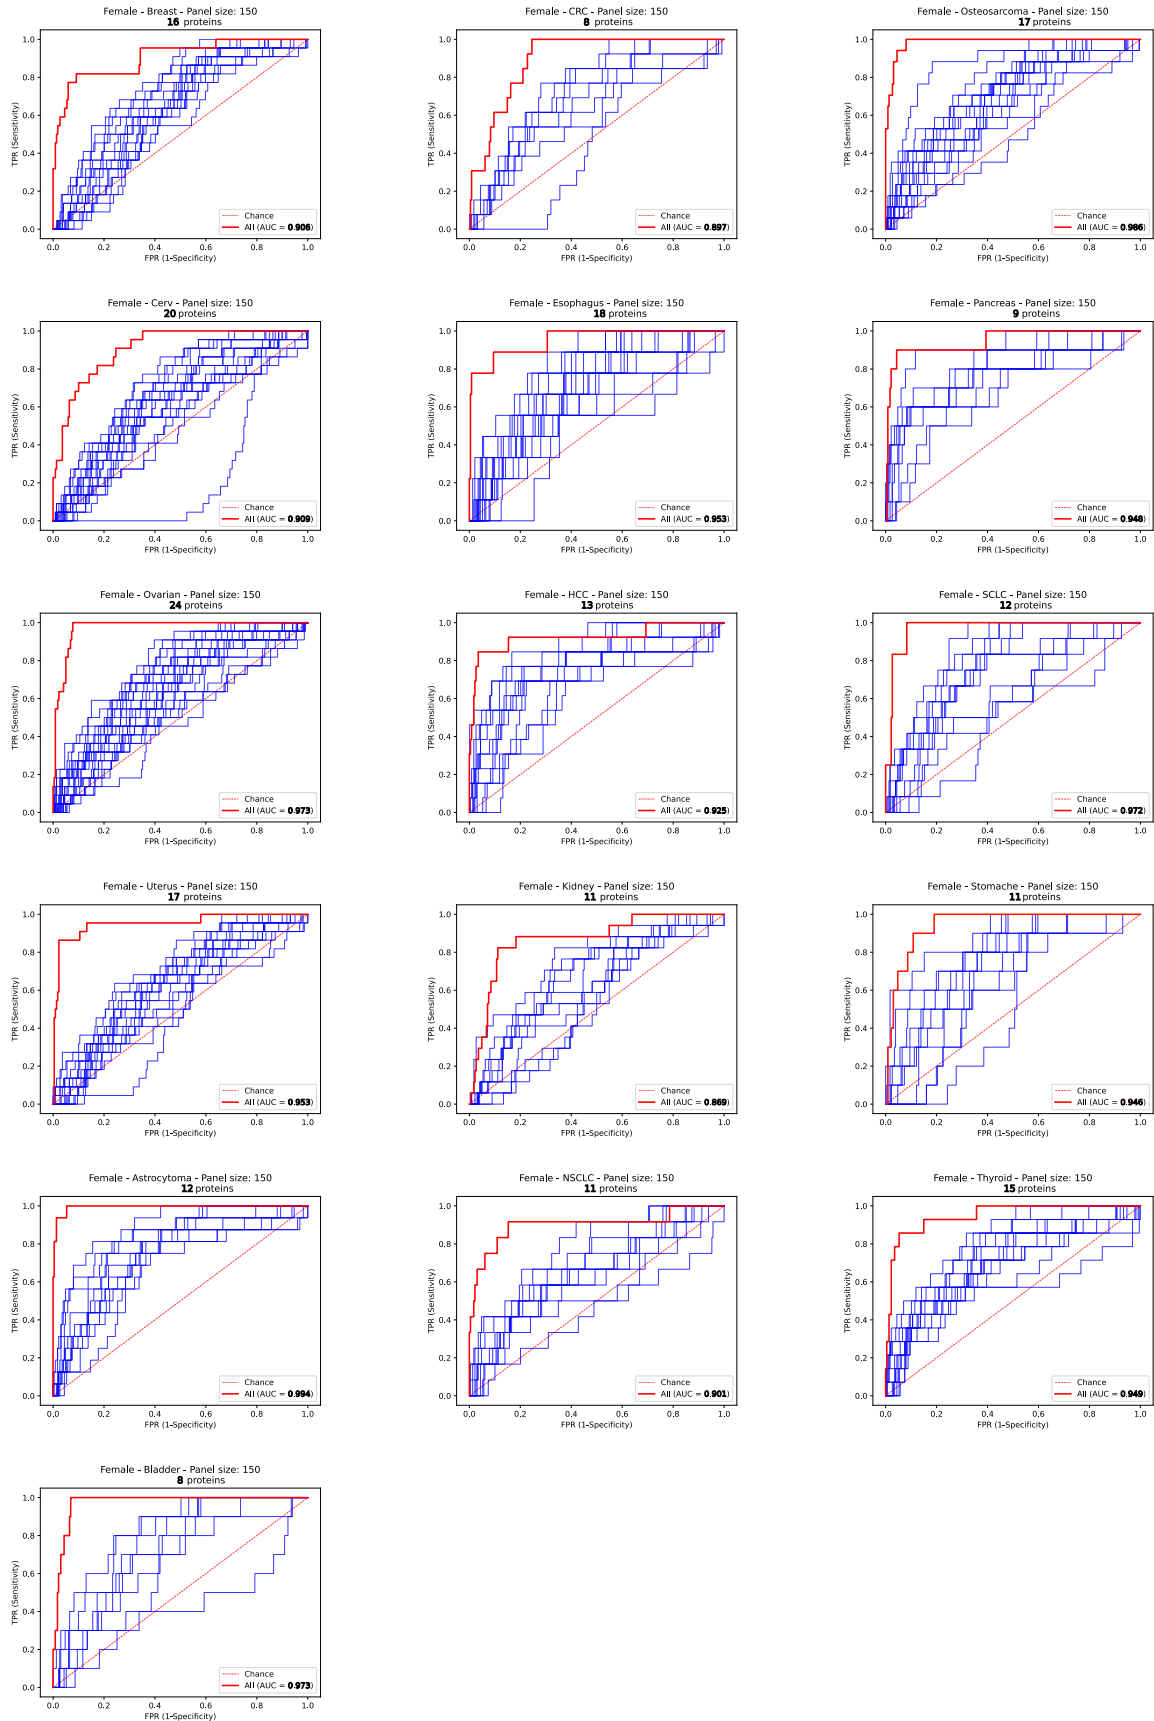

**Table S1.** Characteristics of the samples included in the study.

| <b>Cancer</b> | <b>Subtype</b>                        | <b>Number</b> | <b>Sex (% Male)</b> | <b>Age</b> | <b>Treatment history</b> |
|---------------|---------------------------------------|---------------|---------------------|------------|--------------------------|
| Bladder       | Urothelial carcinoma                  | 22            | 55%                 | 63.1       | Treatment Naive          |
| Breast cancer | Invasive ductal carcinoma             | 22            | 0%                  | 46.3       | Treatment Naive          |
| Brain         | Astrocytoma                           | 22            | 27%                 | 47.1       | Treatment Naive          |
| Cervical      | Cervix uteri carcinoma                | 22            | 0%                  | 50.1       | Treatment Naive          |
| Colorectal    | Adenocarcinoma                        | 22            | 41%                 | 57.8       | Treatment Naive          |
| Kidney        | Kidney renal papillary cell carcinoma | 22            | 23%                 | 57.5       | Treatment Naive          |
| Liver         | Hepatocellular carcinoma              | 22            | 41%                 | 56.7       | Treatment Naive          |
| Lung          | Non-Small Cell (NSCLC)                | 22            | 45%                 | 58         | Treatment Naive          |
| Lung          | Small Cell (SCLC)                     | 22            | 45%                 | 57.2       | Treatment Naive          |
| Oesophagus    | squamous cell carcinoma               | 22            | 59%                 | 61.4       | Treatment Naive          |
| Osteosarcoma  | osteoblastic osteosarcoma             | 22            | 23%                 | 40.4       | Treatment Naive          |
| Ovarian       | Epithelial                            | 22            | 0%                  | 53.7       | Treatment Naive          |
| Pancreas      | Ductal adenocarcinoma                 | 22            | 55%                 | 62.7       | Treatment Naive          |
| Prostate      | Adenocarcinoma                        | 22            | 100%                | 67.4       | Treatment Naive          |
| Stomach       | Adenocarcinoma                        | 22            | 55%                 | 69.2       | Treatment Naive          |
| Testis        | Seminoma                              | 22            | 100%                | 52.2       | Treatment Naive          |
| Thyroid       | medullary thyroid cancer              | 22            | 36%                 | 52.6       | Treatment Naive          |
| Uterus        | Endometrial Cancer                    | 22            | 0%                  | 52         | Treatment Naive          |
| Normal        |                                       | 22            | 100%                | 59.6       |                          |
| Normal        |                                       | 22            | 0%                  | 49.7       |                          |

**Table S2.** List of proteins included in the analysis.

| <b>Protein</b> | <b>Dilution factor</b> | <b>LOD (pg/ml)</b> | <b>LLOQ (pg/ml)</b> | <b>ULOQ (pg/ml)</b> | <b>Hook (pg/mL)</b> | <b>Range (log10)</b> | <b>Intra-CV (%)</b> | <b>Inter-CV (%)</b> |
|----------------|------------------------|--------------------|---------------------|---------------------|---------------------|----------------------|---------------------|---------------------|
| TIA1           | 1:1                    |                    |                     |                     |                     |                      | 9                   | 27                  |
| COMT           | 1:1                    | 97.7               | 195.3               | 100000              | 800000              | 2.7                  | 8                   | 10                  |
| DUOX2          | 1:1                    | 97.7               | 195.3               | 100000              | 200000              | 2.7                  | 7                   | 31                  |
| NPPB           | 1:1                    |                    |                     |                     |                     |                      | 10                  | 18                  |
| TSPAN1         | 1:1                    |                    |                     |                     |                     |                      | 7                   | 9                   |
| CHEK2          | 1:1                    |                    |                     |                     |                     |                      | 13                  | 19                  |
| RCOR1          | 1:1                    | 1.5                | 3.1                 | 3125                | 12500               | 3.0                  | 7                   | 12                  |
| DNAJB8         | 1:1                    |                    |                     |                     |                     |                      | 9                   | 10                  |
| MTPN           | 1:1                    |                    |                     |                     |                     |                      | 8                   | 8                   |
| EDIL3          | 1:1                    | 24.4               | 48.8                | 200000              | 800000              | 3.6                  | 8                   | 13                  |
| THPO           | 1:1                    | 97.7               | 781.3               | 200000              | 400000              | 2.4                  | 9                   | 14                  |
| MPHOSPH8       | 1:1                    | 48.8               | 97.7                | 12500               | 25000               | 2.1                  | 8                   | 19                  |
| ADH4           | 1:1                    |                    |                     |                     |                     |                      | 7                   | 8                   |
| S100P          | 1:1                    |                    |                     |                     |                     |                      | 12                  | 15                  |
| ADAMTS16       | 1:1                    | 6.1                | 24.4                | 25000               | 200000              | 3.0                  | 9                   | 6                   |
| GLO1           | 1:1                    |                    |                     |                     |                     |                      | 7                   | 9                   |
| ACE2           | 1:1                    | 48.8               | 97.7                | 100000              | 400000              | 3.0                  | 9                   | 10                  |
| MSTN           | 1:1                    | 390.6              | 781.3               | 50000               | 400000              | 1.8                  | 10                  | 14                  |
| PAG1           | 1:1                    | 24.4               | 48.8                | 6250                | 200000              | 2.1                  | 11                  | 11                  |
| ADAM15         | 1:1                    | 24.4               | 48.8                | 25000               | 200000              | 2.7                  | 7                   | 10                  |
| EPHX2          | 1:1                    | 390.6              | 781.3               | 100000              | 200000              | 2.1                  | 7                   | 21                  |
| CLTA           | 1:1                    | 3125.0             | 6250.0              | 6400000             | 12800000            | 3.0                  | 7                   | 18                  |
| GRK5           | 1:1                    | 1562.5             | 3125.0              | 400000              | 800000              | 2.1                  | 8                   | 14                  |
| GP2            | 1:1                    | 3.1                | 6.1                 | 12500               | 200000              | 3.3                  | 6                   | 9                   |
| TNF            | 1:1                    | 6.1                | 12.2                | 6250                | 200000              | 2.7                  | 8                   | 16                  |
| HK2            | 1:1                    | 97.7               | 195.3               | 50000               | 200000              | 2.4                  | 9                   | 39                  |
| CTSH           | 1:1                    |                    |                     |                     |                     |                      | 11                  | 10                  |
| ENTPD6         | 1:1                    | 195.3              | 781.3               | 50000               | 800000              | 1.8                  | 8                   | 8                   |
| BOC            | 1:1                    |                    |                     |                     |                     |                      | 8                   | 10                  |
| BMP6           | 1:1                    | 0.001              | 97.7                | 12500               | 200000              | 2.1                  | 13                  | 16                  |
| IL6            | 1:1                    | 0.4                | 0.8                 | 3125                | 12500               | 3.6                  | 6                   | 12                  |
| BAG6           | 1:1                    | 390.6              | 781.3               | 200000              | 400000              | 2.4                  | 8                   | 10                  |
| USP8           | 1:1                    | 3125.0             | 6250.0              | 800000              | 800000              | 2.1                  | 8                   | 13                  |
| ACTA2          | 1:1                    |                    |                     |                     |                     |                      | 7                   | 8                   |
| FABP6          | 1:1                    |                    |                     |                     |                     |                      | 10                  | 24                  |
| MMP7           | 1:1                    | 97.7               | 97.7                | 6250                | 50000               | 1.8                  | 6                   | 8                   |
| PON2           | 1:1                    |                    |                     |                     |                     |                      | 8                   | 8                   |
| WASF1          | 1:1                    | 6250.0             | 12500.0             | 800000              | 1600000             | 1.8                  | 10                  | 19                  |
| CRX            | 1:1                    |                    |                     |                     |                     |                      | 8                   | 13                  |
| VIM            | 1:1                    | 12500.0            | 12500.0             | 1600000             | 3200000             | 2.1                  | 6                   | 60                  |
| DCN            | 1:1                    | 195.3              | 390.6               | 100000              | 200000              | 2.4                  | 7                   | 11                  |
| STK11          | 1:1                    | 390.6              | 781.3               | 400000              | 800000              | 2.7                  | 10                  | 21                  |
| TNNI3          | 1:1                    | 97.7               | 195.3               | 25000               | 200000              | 2.1                  | 15                  | 14                  |

|          |      |       |        |        |         |     |    |    |
|----------|------|-------|--------|--------|---------|-----|----|----|
| ITGB1BP2 | 1:1  | 195.3 | 781.3  | 100000 | 200000  | 2.1 | 9  | 18 |
| TCL1B    | 1:1  | 97.7  | 195.3  | 200000 | 800000  | 3.0 | 8  | 24 |
| SERPINB5 | 1:1  | 781.3 | 1562.5 | 100000 | 200000  | 1.8 | 11 | 21 |
| CTF1     | 1:1  | 195.3 | 781.3  | 100000 | 400000  | 2.1 | 11 | 22 |
| HNRNPK   | 1:1  | 97.7  | 97.7   | 50000  | 200000  | 2.7 | 8  | 12 |
| CEBPB    | 1:1  |       |        |        |         |     | 11 | 41 |
| VSTM2L   | 1:1  |       |        |        |         |     | 8  | 11 |
| ZBTB17   | 1:1  | 6.1   | 12.2   | 6250   | 200000  | 2.7 | 8  | 8  |
| CEP43    | 1:1  | 781.3 | 1562.5 | 100000 | 3200000 | 1.8 | 10 | 24 |
| PTN      | 1:1  |       |        |        |         |     | 20 | 17 |
| CRHR1    | 1:1  | 24.4  | 48.8   | 6250   | 25000   | 2.1 | 7  | 24 |
| SUSD1    | 1:1  | 48.8  | 97.7   | 12500  | 200000  | 2.1 | 8  | 14 |
| TSLP     | 1:1  | 6.1   | 48.8   | 12500  | 200000  | 2.4 | 7  | 14 |
| CA5A     | 1:1  | 1.5   | 6.1    | 6250   | 25000   | 3.0 | 7  | 9  |
| MFAP3    | 1:1  | 24.4  | 48.8   | 100000 | 800000  | 3.3 | 9  | 26 |
| AKR1C4   | 1:1  | 390.6 | 781.3  | 100000 | 400000  | 2.1 | 12 | 17 |
| GPR37    | 1:1  | 781.3 | 1562.5 | 100000 | 400000  | 1.8 | 9  | 11 |
| IRAG2    | 1:1  | 48.8  | 97.7   | 12500  | 50000   | 2.1 | 8  | 12 |
| CEACAM8  | 1:1  |       |        |        |         |     | 9  | 12 |
| HEBP1    | 1:1  |       |        |        |         |     | 8  | 12 |
| CNPY2    | 1:1  |       |        |        |         |     | 7  | 10 |
| VAMP5    | 1:1  | 390.6 | 781.3  | 200000 | 400000  | 2.4 | 8  | 30 |
| GYS1     | 1:1  | 12.2  | 48.8   | 25000  | 200000  | 2.7 | 8  | 16 |
| GZMH     | 1:1  |       |        |        |         |     | 8  | 12 |
| SLITRK6  | 1:1  | 24.4  | 48.8   | 100000 | 400000  | 3.3 | 7  | 14 |
| CLEC1A   | 1:1  | 97.7  | 195.3  | 25000  | 400000  | 2.1 | 7  | 10 |
| ENTPD5   | 1:1  | 48.8  | 97.7   | 100000 | 800000  | 3.0 | 8  | 8  |
| TP53INP1 | 1:1  | 97.7  | 195.3  | 25000  | 200000  | 2.1 | 8  | 8  |
| TINAGL1  | 1:10 | 1.5   | 3.1    | 6250   | 50000   | 3.3 | 10 | 6  |
| CBLIF    | 1:10 | 0.2   | 0.4    | 6250   | 50000   | 4.2 | 9  | 6  |
| FABP2    | 1:10 | 0.4   | 1.5    | 781    | 6250    | 2.7 | 9  | 8  |
| NPDC1    | 1:10 | 6.1   | 12.2   | 3125   | 50000   | 2.4 | 10 | 6  |
| RNASE3   | 1:10 |       |        |        |         |     | 12 | 18 |
| GHRL     | 1:10 | 24.4  | 48.8   | 50000  | 200000  | 3.0 | 8  | 13 |
| GLRX     | 1:10 |       |        |        |         |     | 9  | 11 |
| LEP      | 1:10 | 12.2  | 48.8   | 12500  | 200000  | 2.4 | 7  | 11 |
| LGALS1   | 1:10 | 24.4  | 48.8   | 50000  | 200000  | 3.0 | 12 | 15 |
| IL6ST    | 1:10 | 390.6 | 781.3  | 200000 | 800000  | 2.4 | 7  | 7  |
| NECTIN2  | 1:10 | 0.1   | 0.1    | 195    | 781     | 3.3 | 9  | 6  |
| ACOX1    | 1:10 |       |        |        |         |     | 9  | 15 |
| NTRK2    | 1:10 | 48.8  | 48.8   | 6250   | 50000   | 2.1 | 10 | 10 |
| KITLG    | 1:10 | 3.1   | 6.1    | 12500  | 50000   | 3.3 | 10 | 8  |
| SDC4     | 1:10 | 1.5   | 3.1    | 3125   | 200000  | 3.0 | 9  | 6  |
| QDPR     | 1:10 | 12.2  | 24.4   | 50000  | 800000  | 3.3 | 7  | 7  |
| CANT1    | 1:10 | 6.1   | 12.2   | 6250   | 50000   | 2.7 | 8  | 5  |
| CLUL1    | 1:10 | 6.1   | 12.2   | 6250   | 50000   | 2.7 | 9  | 12 |
| PILRB    | 1:10 | 0.8   | 1.5    | 3125   | 12500   | 3.3 | 7  | 6  |
| SNAP23   | 1:10 | 6.1   | 12.2   | 12500  | 50000   | 3.0 | 12 | 13 |
| CHRDL2   | 1:10 | 195.3 | 390.6  | 50000  | 200000  | 2.1 | 10 | 7  |
| NRCAM    | 1:10 | 6.1   | 12.2   | 6250   | 12500   | 2.7 | 15 | 16 |
| AK1      | 1:10 |       |        |        |         |     | 9  | 10 |
| STK4     | 1:10 | 195.3 | 390.6  | 6250   | 50000   | 1.2 | 6  | 28 |

|           |      |        |        |         |          |     |    |    |
|-----------|------|--------|--------|---------|----------|-----|----|----|
| ANXA4     | 1:10 | 97.7   | 195.3  | 25000   | 800000   | 2.1 | 7  | 14 |
| CLC       | 1:10 | 390.6  | 781.3  | 50000   | 800000   | 1.8 | 10 | 8  |
| DPP7      | 1:10 | 97.7   | 195.3  | 50000   | 400000   | 2.4 | 11 | 15 |
| ACY1      | 1:10 | 390.6  | 781.3  | 400000  | 800000   | 2.7 | 10 | 11 |
| PRKAR1A   | 1:10 | 24.4   | 48.8   | 100000  | 200000   | 3.3 | 12 | 12 |
| PLPBP     | 1:10 | 12.2   | 24.4   | 12500   | 50000    | 2.7 | 9  | 12 |
| PDGFRA    | 1:10 | 12.2   | 48.8   | 6250    | 50000    | 2.1 | 10 | 6  |
| DCTPP1    | 1:10 | 12.2   | 24.4   | 12500   | 50000    | 2.7 | 9  | 9  |
| PCDH17    | 1:10 | 24.4   | 48.8   | 50000   | 400000   | 3.0 | 13 | 10 |
| VSIR      | 1:10 | 1.5    | 3.1    | 1563    | 6250     | 2.7 | 10 | 14 |
| NT-proBNP | 1:10 | 97.7   | 195.3  | 50000   | 200000   | 2.4 | 11 | 9  |
| S100A11   | 1:10 | 6.1    | 6.1    | 3125    | 12500    | 2.7 | 14 | 10 |
| CCL27     | 1:10 |        |        |         |          |     | 17 | 14 |
| TSHB      | 1:10 | 1.5    | 3.1    | 1563    | 3125     | 2.7 | 11 | 7  |
| TGM2      | 1:10 | 6.1    | 24.4   | 50000   | 200000   | 3.3 | 15 | 11 |
| AGXT      | 1:10 | 390.6  | 781.3  | 1600000 | 12800000 | 3.3 | 9  | 10 |
| ICAM5     | 1:10 | 12.2   | 24.4   | 6250    | 50000    | 2.4 | 9  | 9  |
| PM20D1    | 1:10 | 48.8   | 97.7   | 100000  | 800000   | 3.0 | 11 | 13 |
| CLEC5A    | 1:10 | 0.1    | 0.4    | 3125    | 6250     | 3.9 | 9  | 8  |
| CDHR5     | 1:10 | 12.2   | 48.8   | 25000   | 200000   | 2.7 | 10 | 7  |
| ACAN      | 1:10 | 12.2   | 24.4   | 50000   | 200000   | 3.3 | 12 | 9  |
| CDH6      | 1:10 | 97.7   | 195.3  | 25000   | 200000   | 2.1 | 12 | 10 |
| PLIN3     | 1:10 | 195.3  | 390.6  | 50000   | 800000   | 2.1 | 12 | 13 |
| GSTA1     | 1:10 | 3.1    | 6.1    | 12500   | 400000   | 3.3 | 9  | 7  |
| THOP1     | 1:10 | 6.1    | 12.2   | 6250    | 200000   | 2.7 | 9  | 5  |
| IGSF8     | 1:10 | 12.2   | 12.2   | 25000   | 200000   | 3.3 | 9  | 9  |
| PDCD6     | 1:10 | 1562.5 | 1562.5 | 100000  | 800000   | 1.8 | 8  | 10 |
| PLXNB3    | 1:10 | 24.4   | 48.8   | 50000   | 200000   | 3.0 | 10 | 13 |
| MNDA      | 1:10 | 390.6  | 781.3  | 800000  | 800000   | 3.0 | 9  | 10 |
| LEPR      | 1:10 |        |        |         |          |     | 8  | 12 |
| SIGLEC7   | 1:10 | 3.1    | 3.1    | 6250    | 50000    | 3.3 | 8  | 8  |
| APLP1     | 1:10 | 195.3  | 195.3  | 50000   | 400000   | 2.4 | 12 | 15 |
| NPTXR     | 1:10 | 6.1    | 12.2   | 25000   | 50000    | 3.3 | 10 | 7  |
| GRAP2     | 1:10 | 1562.5 | 3125.0 | 400000  | 800000   | 2.1 | 8  | 10 |
| TYRO3     | 1:10 | 3.1    | 6.1    | 1563    | 6250     | 2.4 | 9  | 10 |
| CDH17     | 1:10 | 195.3  | 390.6  | 50000   | 400000   | 2.1 | 14 | 13 |
| SNX9      | 1:10 | 390.6  | 781.3  | 400000  | 800000   | 2.7 | 9  | 11 |
| EIF4EBP1  | 1:10 | 24.4   | 24.4   | 12500   | 50000    | 2.7 | 8  | 8  |
| IL19      | 1:10 | 3.1    | 12.2   | 100000  | 400000   | 3.9 | 9  | 7  |
| IGFBPL1   | 1:10 | 0.001  | 1.5    | 3125    | 6250     | 3.3 | 9  | 9  |
| SSC4D     | 1:10 | 6.1    | 6.1    | 6250    | 200000   | 3.0 | 7  | 8  |
| OLR1      | 1:10 | 3.1    | 3.1    | 3125    | 12500    | 3.0 | 9  | 8  |
| CGREF1    | 1:10 | 24.4   | 48.8   | 6250    | 50000    | 2.1 | 8  | 7  |
| MCFD2     | 1:10 | 48.8   | 97.7   | 12500   | 400000   | 2.1 | 9  | 7  |
| AHCY      | 1:10 | 195.3  | 390.6  | 100000  | 400000   | 2.4 | 8  | 13 |
| SERPINA12 | 1:10 | 24.4   | 97.7   | 6250    | 50000    | 1.8 | 9  | 14 |
| HMOX1     | 1:10 | 3.1    | 3.1    | 6250    | 25000    | 3.3 | 9  | 13 |
| PRSS27    | 1:10 | 12.2   | 24.4   | 25000   | 50000    | 3.0 | 8  | 6  |
| CNST      | 1:10 | 12.2   | 48.8   | 6250    | 50000    | 2.1 | 10 | 21 |
| ADGRG2    | 1:10 | 12.2   | 48.8   | 12500   | 50000    | 2.4 | 10 | 8  |
| LPL       | 1:10 | 195.3  | 195.3  | 400000  | 800000   | 3.3 | 8  | 11 |
| FADD      | 1:10 | 781.3  | 3125.0 | 800000  | 800000   | 2.4 | 9  | 10 |

|          |       |       |       |        |        |     |    |    |
|----------|-------|-------|-------|--------|--------|-----|----|----|
| DIABLO   | 1:10  | 3.1   | 6.1   | 12500  | 50000  | 3.3 | 12 | 28 |
| LRP11    | 1:10  | 12.2  | 48.8  | 6250   | 200000 | 2.1 | 11 | 7  |
| SFTPD    | 1:10  | 6.1   | 12.2  | 6250   | 50000  | 2.7 | 8  | 5  |
| NADK     | 1:10  | 62.5  | 125.0 | 256000 | 512000 | 3.3 | 10 | 6  |
| GPNMB    | 1:10  | 24.4  | 48.8  | 12500  | 200000 | 2.4 | 12 | 10 |
| SDC1     | 1:10  | 6.1   | 12.2  | 6250   | 200000 | 2.7 | 14 | 12 |
| CXCL8    | 1:10  | 0.1   | 0.2   | 781    | 6250   | 3.6 | 10 | 15 |
| LACTB2   | 1:10  | 48.8  | 97.7  | 25000  | 200000 | 2.4 | 8  | 9  |
| SPON2    | 1:10  | 24.4  | 48.8  | 25000  | 400000 | 2.7 | 9  | 8  |
| MEP1B    | 1:10  | 97.7  | 195.3 | 25000  | 50000  | 2.1 | 9  | 9  |
| CD2AP    | 1:10  | 6.1   | 12.2  | 12500  | 50000  | 3.0 | 10 | 9  |
| PPP1R2   | 1:10  | 12.2  | 24.4  | 12500  | 50000  | 2.7 | 9  | 10 |
| SEMA3F   | 1:10  | 148.4 | 296.9 | 38000  | 304000 | 2.1 | 9  | 8  |
| FCRL1    | 1:10  | 97.7  | 195.3 | 400000 | 800000 | 3.3 | 10 | 7  |
| CDH2     | 1:10  | 390.6 | 781.3 | 200000 | 800000 | 2.4 | 11 | 9  |
| REN      | 1:10  | 6.1   | 12.2  | 12500  | 50000  | 3.0 | 9  | 9  |
| CA13     | 1:10  | 6.1   | 24.4  | 12500  | 50000  | 2.7 | 8  | 15 |
| CD69     | 1:10  | 0.8   | 3.1   | 12500  | 50000  | 3.6 | 12 | 14 |
| GDF2     | 1:10  | 1.5   | 6.1   | 12500  | 50000  | 3.3 | 10 | 8  |
| ANGPTL1  | 1:10  | 97.7  | 195.3 | 100000 | 400000 | 2.7 | 9  | 7  |
| MARCO    | 1:10  | 24.4  | 24.4  | 50000  | 800000 | 3.3 | 7  | 6  |
| COL4A1   | 1:10  | 0.8   | 3.1   | 50000  | 200000 | 4.2 | 10 | 6  |
| THBD     | 1:10  | 3.1   | 6.1   | 6250   | 50000  | 3.0 | 9  | 8  |
| GH1      | 1:10  |       |       |        |        |     | 7  | 15 |
| LILRA5   | 1:10  | 0.8   | 1.5   | 3125   | 6250   | 3.3 | 8  | 7  |
| ROR1     | 1:10  | 24.4  | 48.8  | 3125   | 12500  | 1.8 | 10 | 7  |
| KYAT1    | 1:10  | 0.8   | 1.5   | 3125   | 12500  | 3.3 | 12 | 8  |
| FBP1     | 1:10  | 97.7  | 195.3 | 50000  | 200000 | 2.4 | 8  | 40 |
| CXCL5    | 1:10  | 3.1   | 6.1   | 3125   | 6250   | 2.7 | 11 | 10 |
| SOST     | 1:10  | 6.1   | 6.1   | 25000  | 50000  | 3.6 | 8  | 11 |
| CCDC80   | 1:10  | 24.4  | 48.8  | 50000  | 800000 | 3.0 | 10 | 8  |
| TYMP     | 1:10  | 390.6 | 781.3 | 200000 | 800000 | 2.4 | 9  | 17 |
| FAM3C    | 1:10  | 3.1   | 6.1   | 6250   | 50000  | 3.0 | 8  | 7  |
| CTSL     | 1:10  | 24.4  | 97.7  | 50000  | 200000 | 2.7 | 10 | 9  |
| HSPB1    | 1:10  |       |       |        |        |     | 15 | 28 |
| SORT1    | 1:10  | 24.4  | 24.4  | 50000  | 400000 | 3.3 | 9  | 8  |
| DDC      | 1:10  | 3.1   | 6.1   | 25000  | 50000  | 3.6 | 8  | 7  |
| DOK2     | 1:10  | 6.1   | 12.2  | 25000  | 200000 | 3.3 | 10 | 15 |
| UMOD     | 1:100 | 1.5   | 3.1   | 12500  | 100000 | 3.6 | 4  | 3  |
| MFAP5    | 1:100 | 12.2  | 24.4  | 12500  | 100000 | 2.7 | 6  | 9  |
| PLAT     | 1:100 | 0.8   | 3.1   | 25000  | 100000 | 3.9 | 8  | 8  |
| SEMA7A   | 1:100 | 0.8   | 1.5   | 12500  | 50000  | 3.9 | 5  | 5  |
| CES1     | 1:100 | 24.4  | 48.8  | 400000 | 800000 | 3.9 | 5  | 7  |
| CA4      | 1:100 | 0.8   | 1.5   | 12500  | 100000 | 3.9 | 5  | 6  |
| PLTP     | 1:100 | 6.1   | 12.2  | 25000  | 400000 | 3.3 | 5  | 11 |
| LDLR     | 1:100 | 0.8   | 1.5   | 25000  | 100000 | 4.2 | 4  | 14 |
| ICAM2    | 1:100 | 97.7  | 195.3 | 200000 | 400000 | 3.0 | 6  | 9  |
| PCSK9    | 1:100 | 97.7  | 195.3 | 400000 | 800000 | 3.3 | 5  | 28 |
| FABP4    | 1:100 | 48.8  | 195.3 | 50000  | 200000 | 2.4 | 5  | 5  |
| ADAMTS13 | 1:100 | 6.1   | 12.2  | 6250   | 100000 | 2.7 | 6  | 9  |
| IGFBP1   | 1:100 | 1.5   | 3.1   | 12500  | 100000 | 3.6 | 3  | 3  |
| CDH5     | 1:100 | 195.3 | 390.6 | 200000 | 400000 | 2.7 | 5  | 8  |

|           |       |        |         |          |          |     |   |    |
|-----------|-------|--------|---------|----------|----------|-----|---|----|
| IGFBP7    | 1:100 | 12.2   | 24.4    | 12500    | 200000   | 2.7 | 7 | 8  |
| EPHB4     | 1:100 | 1.5    | 3.1     | 12500    | 100000   | 3.6 | 4 | 5  |
| ESAM      | 1:100 | 3.1    | 6.1     | 3125     | 12500    | 2.7 | 4 | 5  |
| ICAM3     | 1:100 | 1.5    | 1.5     | 3125     | 12500    | 3.3 | 3 | 4  |
| MSMB      | 1:100 | 0.001  | 6.1     | 6250     | 12500    | 3.0 | 3 | 5  |
| REG3A     | 1:100 | 0.4    | 0.8     | 1563     | 12500    | 3.3 | 4 | 5  |
| IL2RA     | 1:100 | 0.02   | 0.0     | 391      | 3125     | 3.9 | 5 | 5  |
| CTSB      | 1:100 | 12.2   | 24.4    | 12500    | 25000    | 2.7 | 4 | 4  |
| DKK3      | 1:100 | 6.1    | 12.2    | 25000    | 100000   | 3.3 | 5 | 5  |
| SERPINA11 | 1:100 | 3.1    | 6.1     | 12500    | 100000   | 3.3 | 4 | 14 |
| FUCA1     | 1:100 | 6.1    | 12.2    | 50000    | 200000   | 3.6 | 6 | 13 |
| LTBP2     | 1:100 | 6.1    | 12.2    | 25000    | 200000   | 3.3 | 4 | 5  |
| CRTAC1    | 1:100 | 6.1    | 24.4    | 100000   | 800000   | 3.6 | 6 | 8  |
| TNFRSF10C | 1:100 | 0.4    | 0.8     | 6250     | 12500    | 3.9 | 5 | 5  |
| PEAR1     | 1:100 | 12.2   | 24.4    | 12500    | 100000   | 2.7 | 5 | 4  |
| REG1B     | 1:100 | 0.8    | 1.5     | 1563     | 12500    | 3.0 | 4 | 4  |
| CPA1      | 1:100 | 0.4    | 0.8     | 3125     | 12500    | 3.6 | 6 | 5  |
| DPT       | 1:100 | 3.1    | 6.1     | 6250     | 400000   | 3.0 | 6 | 7  |
| LGALS3    | 1:100 | 12.2   | 48.8    | 12500    | 50000    | 2.4 | 5 | 5  |
| VWF       | 1:100 | 1.5    | 3.1     | 12500    | 100000   | 3.6 | 9 | 32 |
| XG        | 1:100 | 1.5    | 3.1     | 6250     | 12500    | 3.3 | 6 | 10 |
| TGFBR3    | 1:100 | 12.2   | 24.4    | 100000   | 200000   | 3.6 | 5 | 8  |
| PLA2G2A   | 1:100 |        |         |          |          |     | 6 | 9  |
| TNFSF13B  | 1:100 | 0.2    | 0.8     | 12500    | 50000    | 4.2 | 4 | 4  |
| MET       | 1:100 | 6.1    | 12.2    | 12500    | 50000    | 3.0 | 4 | 6  |
| CXCL16    | 1:100 | 0.8    | 1.5     | 12500    | 50000    | 3.9 | 5 | 6  |
| NOTCH3    | 1:100 | 1.5    | 3.1     | 6250     | 50000    | 3.3 | 6 | 8  |
| CA3       | 1:100 | 1562.5 | 12500.0 | 12800000 | 12800000 | 3.0 | 4 | 5  |
| PDGFRB    | 1:100 | 3.1    | 6.1     | 3125     | 12500    | 2.7 | 4 | 4  |
| DLK1      | 1:100 | 0.8    | 3.1     | 6250     | 25000    | 3.3 | 4 | 5  |
| SCARF1    | 1:100 | 0.8    | 1.5     | 3125     | 12500    | 3.3 | 5 | 6  |
| GDF15     | 1:100 | 1.5    | 3.1     | 6250     | 25000    | 3.3 | 5 | 4  |
| CSTB      | 1:100 | 3.1    | 6.1     | 3125     | 12500    | 2.7 | 4 | 3  |
| MB        | 1:100 | 0.8    | 0.8     | 195      | 3125     | 2.4 | 4 | 5  |
| ENPP2     | 1:100 | 390.6  | 781.3   | 100000   | 800000   | 2.1 | 4 | 5  |
| GUSB      | 1:100 | 3.1    | 6.1     | 6250     | 50000    | 3.0 | 4 | 6  |
| IL1RL1    | 1:100 | 0.8    | 3.1     | 3125     | 12500    | 3.0 | 4 | 4  |
| ALCAM     | 1:100 | 3.1    | 6.1     | 3125     | 12500    | 2.7 | 4 | 5  |
| ADGRE5    | 1:100 | 3.1    | 6.1     | 25000    | 200000   | 3.6 | 5 | 7  |
| ENG       | 1:100 | 1.5    | 3.1     | 3125     | 12500    | 3.0 | 4 | 4  |
| CORO1A    | 1:100 | 6.1    | 24.4    | 100000   | 400000   | 3.6 | 6 | 7  |
| COL6A3    | 1:100 | 3.1    | 6.1     | 3125     | 100000   | 2.7 | 4 | 6  |
| SELE      | 1:100 | 0.8    | 1.5     | 1563     | 3125     | 3.0 | 5 | 5  |
| CPB1      | 1:100 | 1.5    | 3.1     | 6250     | 25000    | 3.3 | 4 | 5  |
| CST6      | 1:100 | 12.2   | 24.4    | 3125     | 12500    | 2.1 | 5 | 5  |
| CD209     | 1:100 | 1.5    | 3.1     | 12500    | 100000   | 3.6 | 4 | 6  |
| PLA2G1B   | 1:100 | 0.4    | 0.8     | 6250     | 12500    | 3.9 | 4 | 6  |
| MEGF9     | 1:100 | 0.8    | 1.5     | 6250     | 25000    | 3.6 | 5 | 6  |
| PAM       | 1:100 | 97.7   | 195.3   | 200000   | 800000   | 3.0 | 4 | 6  |
| CCN3      | 1:100 | 0.001  | 1.5     | 6250     | 25000    | 3.6 | 3 | 5  |
| TCN2      | 1:100 | 0.8    | 1.5     | 6250     | 12500    | 3.6 | 5 | 9  |
| LILRB5    | 1:100 | 0.4    | 0.8     | 6250     | 25000    | 3.9 | 4 | 4  |

|          |        |       |        |         |          |     |    |    |
|----------|--------|-------|--------|---------|----------|-----|----|----|
| IGFBP2   | 1:100  | 12.2  | 24.4   | 50000   | 200000   | 3.3 | 5  | 7  |
| RNASET2  | 1:100  | 0.4   | 0.8    | 3125    | 12500    | 3.6 | 4  | 4  |
| AMY2B    | 1:100  | 12.2  | 24.4   | 6250    | 25000    | 2.4 | 8  | 10 |
| CNTN1    | 1:100  | 3.1   | 6.1    | 12500   | 100000   | 3.3 | 5  | 6  |
| CHIT1    | 1:100  | 0.4   | 0.8    | 6250    | 25000    | 3.9 | 5  | 5  |
| COL18A1  | 1:100  | 3.1   | 6.1    | 3125    | 12500    | 2.7 | 4  | 8  |
| FAS      | 1:100  | 0.1   | 0.2    | 6250    | 12500    | 4.5 | 5  | 6  |
| PIIB     | 1:100  | 24.4  | 48.8   | 12500   | 200000   | 2.4 | 8  | 10 |
| CCL16    | 1:100  | 3.1   | 3.1    | 6250    | 12500    | 3.3 | 4  | 8  |
| BLMH     | 1:100  | 24.4  | 48.8   | 12500   | 100000   | 2.4 | 4  | 5  |
| PTPRS    | 1:100  | 3.1   | 6.1    | 6250    | 12500    | 3.0 | 5  | 5  |
| PI3      | 1:100  | 12.2  | 48.8   | 6250    | 12500    | 2.1 | 5  | 5  |
| TIE1     | 1:100  |       |        |         |          |     | 4  | 6  |
| CELA3A   | 1:100  | 1.5   | 6.1    | 6250    | 25000    | 3.0 | 4  | 7  |
| NOTCH1   | 1:100  | 0.2   | 0.4    | 6250    | 12500    | 4.2 | 3  | 4  |
| AMY2A    | 1:100  | 24.4  | 24.4   | 6250    | 12500    | 2.4 | 8  | 8  |
| SIRPA    | 1:100  | 0.4   | 0.8    | 6250    | 12500    | 3.9 | 5  | 7  |
| PDGFA    | 1:100  | 0.4   | 0.8    | 3125    | 12500    | 3.6 | 4  | 6  |
| RETN     | 1:100  | 0.2   | 0.4    | 3125    | 12500    | 3.9 | 6  | 6  |
| PLXNB2   | 1:100  | 0.8   | 1.5    | 6250    | 50000    | 3.6 | 4  | 5  |
| PRTN3    | 1:100  | 12.2  | 48.8   | 6250    | 100000   | 2.1 | 5  | 4  |
| ITGB2    | 1:100  | 1.5   | 3.1    | 6250    | 25000    | 3.3 | 6  | 8  |
| CD59     | 1:100  | 0.001 | 6.1    | 1563    | 3125     | 2.4 | 4  | 6  |
| PGLYRP1  | 1:100  | 0.8   | 1.5    | 3125    | 12500    | 3.3 | 5  | 6  |
| FAP      | 1:100  | 12.2  | 24.4   | 12500   | 25000    | 2.7 | 5  | 6  |
| SERPINE1 | 1:100  | 0.8   | 1.5    | 6250    | 25000    | 3.6 | 6  | 5  |
| EGFR     | 1:100  | 3.1   | 6.1    | 6250    | 12500    | 3.0 | 4  | 6  |
| ACP5     | 1:100  | 0.8   | 1.5    | 6250    | 12500    | 3.6 | 4  | 7  |
| COL1A1   | 1:100  |       |        |         |          |     | 3  | 4  |
| AZU1     | 1:100  | 6.1   | 12.2   | 6250    | 12500    | 2.7 | 7  | 9  |
| CASP3    | 1:100  | 1.5   | 3.1    | 3125    | 12500    | 3.0 | 5  | 9  |
| SPP1     | 1:100  | 1.5   | 3.1    | 6250    | 12500    | 3.3 | 3  | 8  |
| QPCT     | 1:100  | 24.4  | 48.8   | 6250    | 50000    | 2.1 | 5  | 7  |
| GAS6     | 1:100  | 48.8  | 97.7   | 400000  | 800000   | 3.6 | 5  | 7  |
| PRCP     | 1:100  | 24.4  | 24.4   | 6250    | 25000    | 2.4 | 5  | 6  |
| BPIFB1   | 1:100  | 97.7  | 390.6  | 200000  | 800000   | 2.7 | 5  | 8  |
| CCL15    | 1:100  | 3.1   | 6.1    | 6250    | 12500    | 3.0 | 8  | 5  |
| LILRB2   | 1:100  | 0.8   | 1.5    | 6250    | 12500    | 3.6 | 4  | 6  |
| PTPRF    | 1:100  | 3.1   | 6.1    | 25000   | 200000   | 3.6 | 4  | 7  |
| HYOU1    | 1:100  | 24.4  | 24.4   | 12500   | 400000   | 2.7 | 5  | 6  |
| ST6GAL1  | 1:100  | 24.4  | 48.8   | 400000  | 800000   | 3.9 | 6  | 9  |
| LILRB1   | 1:100  | 0.8   | 1.5    | 3125    | 12500    | 3.3 | 4  | 5  |
| MCAM     | 1:1000 | 24.4  | 48.8   | 25000   | 800000   | 2.7 | 8  | 7  |
| F9       | 1:1000 | 48.8  | 97.7   | 50000   | 800000   | 2.7 | 7  | 9  |
| CDH1     | 1:1000 | 6.1   | 6.1    | 12500   | 50000    | 3.3 | 9  | 12 |
| CD46     | 1:1000 | 390.6 | 3125.0 | 6400000 | 12800000 | 3.3 | 11 | 13 |
| NCAM1    | 1:1000 | 6.1   | 12.2   | 25000   | 400000   | 3.3 | 7  | 9  |
| FCGR2A   | 1:1000 | 0.2   | 0.4    | 1563    | 6250     | 3.6 | 10 | 10 |
| CTSZ     | 1:1000 | 0.8   | 1.5    | 3125    | 6250     | 3.3 | 7  | 9  |
| LBP      | 1:1000 |       |        |         |          |     | 11 | 24 |
| HYAL1    | 1:1000 | 24.4  | 24.4   | 25000   | 100000   | 3.0 | 7  | 6  |
| PRSS2    | 1:1000 | 0.4   | 0.8    | 391     | 12500    | 2.7 | 7  | 6  |



|              |        |       |       |        |        |     |    |    |
|--------------|--------|-------|-------|--------|--------|-----|----|----|
| GP1BA        | 1:1000 | 1.5   | 3.1   | 12500  | 25000  | 3.6 | 7  | 11 |
| HSPG2        | 1:1000 | 0.4   | 1.5   | 6250   | 25000  | 3.6 | 5  | 9  |
| IL6R         | 1:1000 | 0.1   | 0.2   | 3125   | 6250   | 4.2 | 7  | 10 |
| DEFA1_DEFA1B | 1:1000 |       |       |        |        |     | 12 | 22 |
| TNC          | 1:1000 | 0.4   | 1.5   | 3125   | 25000  | 3.3 | 9  | 10 |
| SELP         | 1:1000 | 0.2   | 0.4   | 3125   | 12500  | 3.9 | 9  | 11 |
| SPARCL1      | 1:1000 | 6.1   | 12.2  | 12500  | 50000  | 3.0 | 9  | 9  |
| CD163        | 1:1000 | 6.1   | 12.2  | 25000  | 100000 | 3.3 | 8  | 7  |
| IL18BP       | 1:1000 | 0.8   | 1.5   | 12500  | 25000  | 3.9 | 7  | 10 |
| CR2          | 1:1000 | 0.4   | 0.8   | 12500  | 25000  | 4.2 | 6  | 8  |
| ADA2         | 1:1000 | 0.4   | 0.8   | 6250   | 50000  | 3.9 | 6  | 7  |
| ART3         | 1:1000 | 1.5   | 3.1   | 3125   | 25000  | 3.0 | 7  | 7  |
| FCN2         | 1:1000 | 12.2  | 12.2  | 25000  | 800000 | 3.3 | 8  | 11 |
| LCN2         | 1:1000 | 0.8   | 1.5   | 1563   | 25000  | 3.0 | 8  | 9  |
| AXL          | 1:1000 | 0.4   | 0.8   | 6250   | 25000  | 3.9 | 8  | 7  |
| OSMR         | 1:1000 | 6.1   | 12.2  | 12500  | 25000  | 3.0 | 7  | 9  |
| PCOLCE       | 1:1000 | 24.4  | 48.8  | 12500  | 25000  | 2.4 | 9  | 13 |
| NRP1         | 1:1000 | 6.1   | 12.2  | 12500  | 25000  | 3.0 | 8  | 8  |
| CNDP1        | 1:1000 | 390.6 | 781.3 | 400000 | 800000 | 2.7 | 8  | 15 |
| VASN         | 1:1000 | 6.1   | 12.2  | 12500  | 50000  | 3.0 | 9  | 9  |
| VCAM1        | 1:1000 | 1.5   | 3.1   | 12500  | 50000  | 3.6 | 6  | 8  |
| SOD1         | 1:1000 | 24.4  | 97.7  | 6250   | 25000  | 1.8 | 5  | 19 |
| FCGR3B       | 1:1000 | 3.1   | 6.1   | 6250   | 25000  | 3.0 | 7  | 7  |
| CTSD         | 1:1000 | 48.8  | 195.3 | 25000  | 50000  | 2.1 |    |    |
| AOC3         | 1:1000 | 6.1   | 12.2  | 6250   | 25000  | 2.7 | 8  | 8  |
| ANPEP        | 1:1000 | 24.4  | 48.8  | 100000 | 800000 | 3.3 | 7  | 8  |
| CD55         | 1:1000 | 0.2   | 0.4   | 3125   | 6250   | 3.9 | 8  | 9  |
| CHL1         | 1:1000 | 24.4  | 48.8  | 12500  | 400000 | 2.4 | 7  | 8  |
| TFRC         | 1:1000 | 24.4  | 48.8  | 200000 | 800000 | 3.6 | 7  | 6  |
| ITGB1        | 1:1000 | 0.05  | 0.4   | 12500  | 25000  | 4.5 | 11 | 13 |
| TFPI         | 1:1000 | 0.8   | 1.5   | 6250   | 50000  | 3.6 | 10 | 13 |
| C1QTNF1      | 1:1000 | 0.8   | 1.5   | 6250   | 50000  | 3.6 | 17 | 19 |
| CD93         | 1:1000 | 0.2   | 0.4   | 6250   | 25000  | 4.2 | 7  | 8  |
| KIT          | 1:1000 | 0.4   | 0.8   | 1563   | 6250   | 3.3 | 8  | 10 |
| NID1         | 1:1000 | 3.1   | 6.1   | 50000  | 200000 | 3.9 | 7  | 8  |
| APOM         | 1:1000 | 6.1   | 6.1   | 12500  | 50000  | 3.3 | 11 | 12 |
| TIMD4        | 1:1000 | 0.2   | 0.4   | 1563   | 6250   | 3.6 | 8  | 8  |
| CD14         | 1:1000 | 12.2  | 24.4  | 200000 | 400000 | 3.9 | 10 | 14 |
| RARRES2      | 1:1000 | 6.1   | 24.4  | 25000  | 800000 | 3.0 | 8  | 12 |
| SSC5D        | 1:1000 | 48.8  | 97.7  | 50000  | 400000 | 2.7 | 9  | 10 |
| TFF3         | 1:1000 | 0.2   | 0.4   | 781    | 3125   | 3.3 | 10 | 10 |
| THBS4        | 1:1000 | 6.1   | 24.4  | 50000  | 200000 | 3.3 | 7  | 9  |
| CCL18        | 1:1000 | 0.4   | 0.8   | 3125   | 6250   | 3.6 | 10 | 23 |
| ANGPTL3      | 1:1000 | 1.5   | 3.1   | 12500  | 100000 | 3.6 | 10 | 9  |
| CCL14        | 1:1000 | 0.1   | 0.4   | 1563   | 6250   | 3.6 | 7  | 11 |
| F7           | 1:1000 | 0.8   | 3.1   | 6250   | 25000  | 3.3 | 6  | 10 |
| PTGDS        | 1:1000 | 3.1   | 6.1   | 12500  | 50000  | 3.3 | 7  | 8  |
| C2           | 1:1000 | 48.8  | 97.7  | 200000 | 800000 | 3.3 | 7  | 11 |
| IGFBP6       | 1:1000 | 0.8   | 1.5   | 12500  | 25000  | 3.9 | 6  | 8  |
| TGFBI        | 1:1000 | 97.7  | 195.3 | 100000 | 400000 | 2.7 | 8  | 12 |
| CHI3L1       | 1:1000 | 0.4   | 0.8   | 3125   | 6250   | 3.6 | 6  | 10 |
| ITIH3        | 1:1000 | 48.8  | 97.7  | 50000  | 100000 | 2.7 | 7  | 10 |

|         |        |         |         |        |         |     |    |    |
|---------|--------|---------|---------|--------|---------|-----|----|----|
| FETUB   | 1:1000 | 12.2    | 48.8    | 50000  | 200000  | 3.0 | 7  | 7  |
| COMP    | 1:1000 | 1.5     | 3.1     | 12500  | 50000   | 3.6 | 8  | 9  |
| GGH     | 1:1000 | 195.3   | 390.6   | 50000  | 400000  | 2.1 | 6  | 7  |
| CA1     | 1:1000 | 0.8     | 1.5     | 25000  | 100000  | 4.2 | 6  | 7  |
| CCL5    | 1:1000 | 0.4     | 1.5     | 1563   | 12500   | 3.0 | 10 | 14 |
| REG1A   | 1:1000 | 0.05    | 0.1     | 3125   | 6250    | 4.5 | 6  | 7  |
| EFEMP1  | 1:1000 | 24.4    | 48.8    | 50000  | 100000  | 3.0 | 10 | 14 |
| ANG     | 1:1000 | 0.8     | 1.5     | 781    | 3125    | 2.7 | 7  | 11 |
| DPP4    | 1:1000 | 12.2    | 48.8    | 12500  | 100000  | 2.4 | 6  | 8  |
| PROC    | 1:1000 | 97.7    | 195.3   | 100000 | 400000  | 2.7 | 7  | 8  |
| ICAM1   | 1:1000 | 0.4     | 0.8     | 6250   | 25000   | 3.9 | 8  | 8  |
| CST3    | 1:1000 | 12.2    | 48.8    | 6250   | 12500   | 2.1 | 6  | 13 |
| IGFBP3  | 1:1000 | 12.2    | 24.4    | 12500  | 25000   | 2.7 | 8  | 9  |
| TIMP1   | 1:1000 | 0.8     | 1.5     | 3125   | 12500   | 3.3 | 9  | 10 |
| IDO1    | 1:1    | 390.6   | 1562.5  | 200000 | 400000  | 2.1 | 10 | 13 |
| SCRIB   | 1:1    | 195.3   | 390.6   | 50000  | 200000  | 2.1 | 8  | 22 |
| MYL4    | 1:1    | 3125.0  | 3125.0  | 100000 | 800000  | 1.5 | 11 | 20 |
| PECR    | 1:1    |         |         |        |         |     | 6  | 7  |
| EHD3    | 1:1    | 6250.0  | 12500.0 | 800000 | 800000  | 1.8 | 6  | 27 |
| ENTR1   | 1:1    | 781.3   | 781.3   | 400000 | 800000  | 2.7 | 9  | 15 |
| CEP170  | 1:1    | 48.8    | 48.8    | 3125   | 6250    | 1.8 | 6  | 11 |
| HSBP1   | 1:1    | 12.2    | 12.2    | 3125   | 25000   | 2.4 | 6  | 29 |
| SKIV2L  | 1:1    |         |         |        |         |     | 7  | 25 |
| CSF2    | 1:1    | 12.2    | 24.4    | 12500  | 50000   | 2.7 | 16 | 18 |
| RYR1    | 1:1    | 390.6   | 781.3   | 100000 | 200000  | 2.1 | 13 | 12 |
| MEGF11  | 1:1    | 97.7    | 97.7    | 25000  | 200000  | 2.4 | 10 | 10 |
| HIP1    | 1:1    | 1562.5  | 3125.0  | 200000 | 400000  | 1.8 | 8  |    |
| RTKN2   | 1:1    | 3125.0  | 6250.0  | 400000 | 800000  | 1.8 | 5  |    |
| UGDH    | 1:1    |         |         |        |         |     | 9  | 24 |
| CASQ2   | 1:1    | 6250.0  | 6250.0  | 400000 | 1600000 | 1.8 | 12 | 21 |
| HCG22   | 1:1    | 24.4    | 48.8    | 12500  | 50000   | 2.4 | 6  | 16 |
| NECAP2  | 1:1    | 12500.0 | 12500.0 | 400000 | 800000  | 1.5 | 15 | 25 |
| ATP2B4  | 1:1    | 390.6   | 390.6   | 25000  | 400000  | 1.8 |    |    |
| RBM19   | 1:1    | 390.6   | 390.6   | 100000 | 400000  | 2.4 | 14 | 18 |
| MYH4    | 1:1    | 390.6   | 390.6   | 25000  | 200000  | 1.8 | 14 |    |
| ATP1B3  | 1:1    | 781.3   | 781.3   | 100000 | 400000  | 2.1 |    |    |
| CYP24A1 | 1:1    | 1562.5  | 3125.0  | 200000 | 800000  | 1.8 | 15 |    |
| GCLM    | 1:1    | 1562.5  | 3125.0  | 200000 | 800000  | 1.8 | 11 | 17 |
| TPM3    | 1:1    | 1562.5  | 1562.5  | 200000 | 400000  | 2.1 | 11 | 12 |
| KRT17   | 1:1    | 390.6   | 781.3   | 200000 | 800000  | 2.4 |    |    |
| LAMA1   | 1:1    |         |         |        |         |     |    |    |
| BRD3    | 1:1    |         |         |        |         |     | 12 | 32 |
| NOP56   | 1:1    | 3125.0  | 3125.0  | 200000 | 400000  | 1.8 | 13 | 37 |
| EIF2AK3 | 1:1    | 3125.0  | 6250.0  | 400000 | 800000  | 1.8 | 17 | 15 |
| NOS2    | 1:1    | 390.6   | 781.3   | 400000 | 800000  | 2.7 | 15 | 17 |
| MED21   | 1:1    | 781.3   | 1562.5  | 100000 | 400000  | 1.8 | 9  | 17 |
| ADRA2A  | 1:1    | 3125.0  | 6250.0  | 200000 | 400000  | 1.5 | 9  | 15 |
| ACSL1   | 1:1    | 3125.0  | 6250.0  | 200000 | 400000  | 1.5 |    |    |
| ITPA    | 1:1    | 781.3   | 1562.5  | 50000  | 400000  | 1.5 | 8  | 21 |
| ATP5F1D | 1:1    | 390.6   | 390.6   | 50000  | 200000  | 2.1 | 10 | 20 |
| FDX1    | 1:1    |         |         |        |         |     | 9  |    |
| SLC12A2 | 1:1    |         |         |        |         |     | 8  |    |

|           |     |         |          |         |          |     |    |    |
|-----------|-----|---------|----------|---------|----------|-----|----|----|
| EXOSC10   | 1:1 | 3125.0  | 6250.0   | 400000  | 800000   | 1.8 | 12 | 3  |
| NXPE4     | 1:1 | 1562.5  | 1562.5   | 200000  | 400000   | 2.1 | 7  | 14 |
| REXO2     | 1:1 | 97.7    | 195.3    | 12500   | 400000   | 1.8 | 14 |    |
| MAP1LC3B2 | 1:1 | 3125.0  | 3125.0   | 200000  | 800000   | 1.8 | 8  | 15 |
| PDE4D     | 1:1 | 25000.0 | 50000.0  | 3200000 | 12800000 | 1.8 | 10 | 50 |
| RPS10     | 1:1 |         |          |         |          |     |    |    |
| RAB39B    | 1:1 | 3125.0  | 3125.0   | 200000  | 800000   | 1.8 | 13 | 16 |
| TMED10    | 1:1 | 390.6   | 781.3    | 100000  | 200000   | 2.1 | 7  | 12 |
| ACY3      | 1:1 |         |          |         |          |     | 10 | 9  |
| ERVV-1    | 1:1 | 195.3   | 781.3    | 100000  | 200000   | 2.1 | 15 | 33 |
| TRAF3IP2  | 1:1 | 195.3   | 195.3    | 100000  | 200000   | 2.7 | 10 | 11 |
| CACNA1H   | 1:1 | 390.6   | 781.3    | 100000  | 400000   | 2.1 | 12 | 20 |
| BHMT2     | 1:1 | 50000.0 | 100000.0 | 6400000 | 12800000 | 1.8 |    |    |
| CD2       | 1:1 | 781.3   | 1562.5   | 200000  | 400000   | 2.1 | 10 | 14 |
| SHD       | 1:1 | 6250.0  | 6250.0   | 400000  | 800000   | 1.8 | 12 | 8  |
| SNU13     | 1:1 |         |          |         |          |     | 8  | 12 |
| THRAP3    | 1:1 | 3125.0  | 3125.0   | 200000  | 800000   | 1.8 | 9  | 15 |
| TSPAN15   | 1:1 | 390.6   | 781.3    | 100000  | 200000   | 2.1 | 15 | 14 |
| UBQLN3    | 1:1 | 390.6   | 390.6    | 100000  | 200000   | 2.4 |    |    |
| DENND2B   | 1:1 | 3125.0  | 3125.0   | 200000  | 400000   | 1.8 | 11 | 6  |
| GAMT      | 1:1 |         |          |         |          |     | 12 |    |
| ELOB      | 1:1 | 1562.5  | 1562.5   | 100000  | 400000   | 1.8 | 10 | 32 |
| NEB       | 1:1 | 781.3   | 1562.5   | 200000  | 400000   | 2.1 | 13 | 8  |
| DDA1      | 1:1 | 1171.9  | 1171.9   | 300000  | 600000   | 2.4 | 11 | 11 |
| CPTP      | 1:1 | 6250.0  | 12500.0  | 400000  | 800000   | 1.5 | 7  | 17 |
| PMM2      | 1:1 |         |          |         |          |     | 11 | 39 |
| ATP1B1    | 1:1 | 195.3   | 195.3    | 25000   | 200000   | 2.1 | 11 | 11 |
| SLC51B    | 1:1 | 781.3   | 781.3    | 100000  | 400000   | 2.1 | 10 | 22 |
| IGHMBP2   | 1:1 | 390.6   | 781.3    | 50000   | 200000   | 1.8 |    |    |
| RAB33A    | 1:1 | 6250.0  | 12500.0  | 800000  | 800000   | 1.8 | 12 | 21 |
| ARL2BP    | 1:1 | 1562.5  | 3125.0   | 200000  | 400000   | 1.8 | 9  | 17 |
| TTN       | 1:1 | 195.3   | 390.6    | 12500   | 200000   | 1.5 | 10 | 12 |
| TPR       | 1:1 | 97.7    | 97.7     | 12500   | 100000   | 2.1 | 14 | 16 |
| ECI2      | 1:1 | 6250.0  | 12500.0  | 400000  | 800000   | 1.5 | 13 | 35 |
| MYL1      | 1:1 | 6250.0  | 6250.0   | 200000  | 400000   | 1.5 | 6  | 14 |
| ATP1B2    | 1:1 | 781.3   | 1562.5   | 100000  | 400000   | 1.8 |    |    |
| GASK1A    | 1:1 |         |          |         |          |     | 12 | 15 |
| ABCA2     | 1:1 | 781.3   | 1562.5   | 200000  | 400000   | 2.1 | 19 | 26 |
| ZCCHC8    | 1:1 | 48.8    | 97.7     | 50000   | 100000   | 2.7 | 18 | 30 |
| CALY      | 1:1 | 3125.0  | 3125.0   | 200000  | 800000   | 1.8 | 6  | 15 |
| NPR1      | 1:1 | 3125.0  | 6250.0   | 200000  | 800000   | 1.5 | 8  | 9  |
| MTR       | 1:1 | 781.3   | 781.3    | 50000   | 400000   | 1.8 | 20 | 10 |
| CEP112    | 1:1 | 195.3   | 390.6    | 100000  | 200000   | 2.4 | 8  | 10 |
| HSD17B3   | 1:1 | 3125.0  | 3125.0   | 200000  | 800000   | 1.8 | 12 | 25 |
| EXTL1     | 1:1 | 390.6   | 390.6    | 100000  | 200000   | 2.4 | 10 | 14 |
| SAT1      | 1:1 | 195.3   | 195.3    | 12500   | 100000   | 1.8 | 2  |    |
| SART1     | 1:1 | 390.6   | 1562.5   | 100000  | 400000   | 1.8 | 11 | 15 |
| USP47     | 1:1 | 390.6   | 781.3    | 100000  | 400000   | 2.1 |    |    |
| SCGB2A2   | 1:1 | 1562.5  | 3125.0   | 200000  | 400000   | 1.8 | 23 |    |
| FDX2      | 1:1 | 195.3   | 195.3    | 12500   | 200000   | 1.8 | 13 | 18 |
| IFNW1     | 1:1 | 195.3   | 390.6    | 200000  | 400000   | 2.7 | 4  | 1  |
| RIPK4     | 1:1 | 1562.5  | 1562.5   | 200000  | 800000   | 2.1 | 15 | 31 |

|          |     |         |         |        |         |     |    |    |
|----------|-----|---------|---------|--------|---------|-----|----|----|
| NUP50    | 1:1 |         |         |        |         |     | 11 |    |
| DHODH    | 1:1 | 12500.0 | 12500.0 | 800000 | 800000  | 1.8 | 10 |    |
| GBP6     | 1:1 |         |         |        |         |     |    |    |
| EDEM2    | 1:1 | 1562.5  | 3125.0  | 200000 | 800000  | 1.8 | 13 | 6  |
| ENPEP    | 1:1 | 390.6   | 781.3   | 100000 | 400000  | 2.1 | 13 | 21 |
| NFYA     | 1:1 |         |         |        |         |     | 11 | 10 |
| PGLYRP4  | 1:1 | 390.6   | 390.6   | 50000  | 100000  | 2.1 | 8  | 25 |
| TRPV3    | 1:1 | 24.4    | 24.4    | 12500  | 50000   | 2.7 | 14 | 23 |
| NUDT15   | 1:1 | 390.6   | 390.6   | 25000  | 200000  | 1.8 | 14 | 19 |
| GUK1     | 1:1 |         |         |        |         |     | 13 | 3  |
| HADH     | 1:1 |         |         |        |         |     |    |    |
| MYOM2    | 1:1 | 97.7    | 195.3   | 12500  | 100000  | 1.8 | 18 | 17 |
| PRKD2    | 1:1 | 6250.0  | 12500.0 | 800000 | 3200000 | 1.8 | 9  | 10 |
| TEF      | 1:1 | 195.3   | 781.3   | 200000 | 800000  | 2.4 | 14 | 11 |
| MANSC4   | 1:1 | 390.6   | 390.6   | 25000  | 200000  | 1.8 | 10 | 33 |
| ABRAXAS2 | 1:1 |         |         |        |         |     | 9  | 18 |
| IGF2BP3  | 1:1 | 12500.0 | 12500.0 | 200000 | 800000  | 1.2 |    |    |
| PROCR    | 1:1 |         |         |        |         |     | 8  | 26 |
| KIF22    | 1:1 |         |         |        |         |     | 15 | 37 |
| COPB2    | 1:1 | 195.3   | 195.3   | 6250   | 400000  | 1.5 | 16 | 32 |
| PMCH     | 1:1 | 3125.0  | 3125.0  | 100000 | 800000  | 1.5 | 8  | 12 |
| UHRF2    | 1:1 | 781.3   | 1562.5  | 100000 | 200000  | 1.8 |    |    |
| ASS1     | 1:1 | 781.3   | 3125.0  | 200000 | 400000  | 1.8 | 9  | 18 |
| KRT6C    | 1:1 | 390.6   | 390.6   | 25000  | 200000  | 1.8 |    |    |
| ARNTL    | 1:1 | 3125.0  | 6250.0  | 400000 | 800000  | 1.8 |    |    |
| ATP6V1G2 | 1:1 |         |         |        |         |     | 22 | 17 |
| CSRP3    | 1:1 | 1562.5  | 3125.0  | 50000  | 200000  | 1.2 | 24 | 22 |
| ARL13B   | 1:1 | 195.3   | 195.3   | 25000  | 400000  | 2.1 | 13 | 24 |
| GSTM4    | 1:1 | 3125.0  | 3125.0  | 200000 | 800000  | 1.8 | 12 | 12 |
| KIF1C    | 1:1 | 97.7    | 97.7    | 25000  | 50000   | 2.4 | 9  | 10 |
| LILRA4   | 1:1 |         |         |        |         |     | 12 |    |
| ANK2     | 1:1 | 195.3   | 390.6   | 50000  | 100000  | 2.1 | 11 | 11 |
| NFKB1    | 1:1 |         |         |        |         |     | 13 | 19 |
| MMUT     | 1:1 |         |         |        |         |     | 12 | 34 |
| NFX1     | 1:1 | 1562.5  | 3125.0  | 100000 | 400000  | 1.5 | 14 | 22 |
| HMGCS1   | 1:1 | 6250.0  | 6250.0  | 200000 | 400000  | 1.5 | 8  | 6  |
| B3GAT3   | 1:1 |         |         |        |         |     |    |    |
| CBX2     | 1:1 | 3125.0  | 3125.0  | 400000 | 800000  | 2.1 | 10 |    |
| MRPL24   | 1:1 | 3125.0  | 6250.0  | 400000 | 800000  | 1.8 | 11 | 16 |
| BRDT     | 1:1 | 48.8    | 97.7    | 12500  | 50000   | 2.1 | 13 | 20 |
| NUDT10   | 1:1 | 781.3   | 781.3   | 50000  | 200000  | 1.8 |    |    |
| GNPDA1   | 1:1 | 195.3   | 195.3   | 12500  | 100000  | 1.8 | 9  | 12 |
| SEL1L    | 1:1 | 390.6   | 781.3   | 100000 | 400000  | 2.1 | 7  | 8  |
| TOR1AIP1 | 1:1 | 6250.0  | 12500.0 | 800000 | 3200000 | 1.8 | 10 | 26 |
| PNMA1    | 1:1 | 6250.0  | 12500.0 | 800000 | 800000  | 1.8 | 9  | 24 |
| VIPR1    | 1:1 | 195.3   | 390.6   | 100000 | 800000  | 2.4 |    |    |
| ACTN2    | 1:1 | 781.3   | 1562.5  | 100000 | 400000  | 1.8 | 18 | 18 |
| LRCH4    | 1:1 |         |         |        |         |     | 17 | 17 |
| LPP      | 1:1 |         |         |        |         |     | 14 | 15 |
| VSIG10L  | 1:1 | 6250.0  | 6250.0  | 200000 | 800000  | 1.5 | 10 |    |
| NAA10    | 1:1 |         |         |        |         |     | 20 | 35 |
| FHIP2A   | 1:1 |         |         |        |         |     | 8  | 7  |

|            |     |         |         |        |         |     |    |    |
|------------|-----|---------|---------|--------|---------|-----|----|----|
| PACS2      | 1:1 | 97.7    | 195.3   | 25000  | 200000  | 2.1 | 13 | 25 |
| TSNAX      | 1:1 |         |         |        |         |     | 11 | 20 |
| PKD2       | 1:1 | 781.3   | 1562.5  | 100000 | 200000  | 1.8 | 12 | 17 |
| CSDE1      | 1:1 |         |         |        |         |     | 16 | 20 |
| PALM3      | 1:1 |         |         |        |         |     | 12 | 19 |
| YOD1       | 1:1 |         |         |        |         |     | 14 | 21 |
| C1GALT1C1  | 1:1 |         |         |        |         |     | 16 | 26 |
| EIF5       | 1:1 | 781.3   | 1562.5  | 100000 | 400000  | 1.8 | 16 | 27 |
| FRMD4B     | 1:1 |         |         |        |         |     | 11 | 19 |
| GP1BB      | 1:1 |         |         |        |         |     | 15 | 28 |
| SPINK8     | 1:1 | 781.3   | 1562.5  | 200000 | 400000  | 2.1 | 10 |    |
| PDZD2      | 1:1 | 390.6   | 390.6   | 200000 | 400000  | 2.7 | 14 | 20 |
| PYY        | 1:1 |         |         |        |         |     | 14 | 18 |
| TMED4      | 1:1 | 1562.5  | 1562.5  | 100000 | 400000  | 1.8 | 11 |    |
| ENOX2      | 1:1 | 1562.5  | 3125.0  | 800000 | 3200000 | 2.4 | 8  | 27 |
| LMOD1      | 1:1 | 195.3   | 390.6   | 200000 | 800000  | 2.7 | 7  | 24 |
| MYBPC2     | 1:1 | 781.3   | 1562.5  | 100000 | 800000  | 1.8 | 7  | 21 |
| IGSF21     | 1:1 | 1562.5  | 1562.5  | 100000 | 400000  | 1.8 | 7  | 15 |
| ENO3       | 1:1 |         |         |        |         |     |    |    |
| M6PR       | 1:1 | 97.7    | 97.7    | 6250   | 25000   | 1.8 | 9  | 12 |
| HRC        | 1:1 | 781.3   | 1562.5  | 200000 | 3200000 | 2.1 | 8  | 16 |
| SIL1       | 1:1 | 390.6   | 781.3   | 50000  | 200000  | 1.8 | 6  | 9  |
| PAGR1      | 1:1 | 195.3   | 195.3   | 50000  | 400000  | 2.4 | 15 | 17 |
| FSHB       | 1:1 | 97.7    | 195.3   | 12500  | 100000  | 1.8 | 6  | 9  |
| SNED1      | 1:1 | 1562.5  | 3125.0  | 400000 | 800000  | 2.1 | 12 | 21 |
| APOBR      | 1:1 |         |         |        |         |     | 7  | 12 |
| RECK       | 1:1 | 1562.5  | 1562.5  | 50000  | 200000  | 1.5 | 7  | 5  |
| DMP1       | 1:1 | 3125.0  | 6250.0  | 800000 | 6400000 | 2.1 | 8  | 35 |
| KHK        | 1:1 | 195.3   | 195.3   | 12500  | 100000  | 1.8 | 6  | 20 |
| BECN1      | 1:1 | 12500.0 | 25000.0 | 800000 | 800000  | 1.5 | 10 | 14 |
| RNF5       | 1:1 |         |         |        |         |     | 12 | 21 |
| CCER2      | 1:1 | 1562.5  | 1562.5  | 100000 | 400000  | 1.8 | 9  | 12 |
| COQ7       | 1:1 | 390.6   | 781.3   | 100000 | 400000  | 2.1 | 12 | 18 |
| HS1BP3     | 1:1 | 3125.0  | 3125.0  | 100000 | 800000  | 1.5 | 8  | 25 |
| COMMD1     | 1:1 | 24.4    | 48.8    | 12500  | 50000   | 2.4 | 8  | 16 |
| OXCT1      | 1:1 | 781.3   | 3125.0  | 200000 | 800000  | 1.8 | 10 | 21 |
| ATP6V1G1   | 1:1 | 3125.0  | 3125.0  | 200000 | 800000  | 1.8 | 12 | 35 |
| DMD        | 1:1 | 390.6   | 781.3   | 200000 | 800000  | 2.4 | 9  | 17 |
| SNX5       | 1:1 |         |         |        |         |     | 5  | 9  |
| EDN1       | 1:1 |         |         |        |         |     | 6  | 15 |
| ROBO4      | 1:1 |         |         |        |         |     | 6  | 9  |
| AHNAK2     | 1:1 | 97.7    | 195.3   | 12500  | 50000   | 1.8 | 6  | 9  |
| HMGCL      | 1:1 | 781.3   | 1562.5  | 100000 | 400000  | 1.8 | 8  | 25 |
| ITPR1      | 1:1 | 781.3   | 1562.5  | 100000 | 400000  | 1.8 | 13 | 14 |
| AIF1L      | 1:1 | 390.6   | 781.3   | 200000 | 800000  | 2.4 | 7  | 19 |
| LONP1      | 1:1 | 781.3   | 781.3   | 50000  | 200000  | 1.8 | 10 | 28 |
| AAMDC      | 1:1 |         |         |        |         |     | 8  | 13 |
| OPLAH      | 1:1 |         |         |        |         |     | 7  | 24 |
| PYDC1      | 1:1 | 6.1     | 12.2    | 1563   | 12500   | 2.1 | 7  | 11 |
| DNAJC6     | 1:1 |         |         |        |         |     | 6  | 30 |
| RNF149     | 1:1 | 97.7    | 97.7    | 6250   | 50000   | 1.8 | 9  | 11 |
| GADD45GIP1 | 1:1 |         |         |        |         |     | 10 | 25 |

|          |      |         |          |         |          |     |    |    |
|----------|------|---------|----------|---------|----------|-----|----|----|
| RNASE10  | 1:1  | 195.3   | 195.3    | 12500   | 100000   | 1.8 | 7  | 13 |
| CBS      | 1:1  | 3125.0  | 3125.0   | 800000  | 800000   | 2.4 | 9  | 25 |
| ECHS1    | 1:1  |         |          |         |          |     | 8  | 27 |
| FAM172A  | 1:1  | 390.6   | 781.3    | 100000  | 400000   | 2.1 | 8  | 20 |
| ANP32C   | 1:1  | 97.7    | 195.3    | 50000   | 400000   | 2.4 | 1  |    |
| CALCOCO2 | 1:1  | 195.3   | 195.3    | 50000   | 200000   | 2.4 | 8  | 15 |
| SEC31A   | 1:1  |         |          |         |          |     | 7  | 31 |
| NFE2     | 1:1  |         |          |         |          |     | 8  | 12 |
| BOLA2    | 1:1  | 195.3   | 195.3    | 25000   | 200000   | 2.1 | 7  | 11 |
| LIPF     | 1:1  | 195.3   | 390.6    | 50000   | 200000   | 2.1 | 7  | 22 |
| ZP3      | 1:1  | 48.8    | 97.7     | 25000   | 50000    | 2.4 |    |    |
| GRP      | 1:1  |         |          |         |          |     | 6  | 22 |
| EIF2S2   | 1:1  |         |          |         |          |     | 11 | 25 |
| MAN1A2   | 1:1  | 781.3   | 781.3    | 100000  | 800000   | 2.1 | 5  | 8  |
| SIGLEC8  | 1:1  | 12.2    | 12.2     | 6250    | 25000    | 2.7 | 6  | 11 |
| AHNAK    | 1:1  | 97.7    | 195.3    | 50000   | 200000   | 2.4 | 7  | 14 |
| INPP5D   | 1:1  | 3125.0  | 3125.0   | 200000  | 800000   | 1.8 | 8  | 12 |
| RANBP1   | 1:1  |         |          |         |          |     | 7  | 14 |
| RBPM2    | 1:1  | 48.8    | 97.7     | 6250    | 12500    | 1.8 | 6  | 30 |
| ANXA2    | 1:1  | 6250.0  | 12500.0  | 800000  | 800000   | 1.8 | 9  | 14 |
| HSDL2    | 1:1  |         |          |         |          |     | 8  | 12 |
| NAGK     | 1:1  | 195.3   | 390.6    | 12500   | 100000   | 1.5 | 7  | 22 |
| CRYZL1   | 1:1  | 48.8    | 195.3    | 25000   | 50000    | 2.1 | 7  | 28 |
| TMEM132A | 1:1  |         |          |         |          |     |    |    |
| COL2A1   | 1:1  | 97.7    | 97.7     | 12500   | 50000    | 2.1 | 6  | 15 |
| CNP      | 1:1  | 781.3   | 781.3    | 100000  | 800000   | 2.1 | 6  | 14 |
| RPL14    | 1:1  | 50000.0 | 100000.0 | 6400000 | 12800000 | 1.8 | 14 | 18 |
| ASRGL1   | 1:1  |         |          |         |          |     | 16 | 31 |
| POMC     | 1:1  |         |          |         |          |     |    |    |
| B3GNT7   | 1:1  | 781.3   | 781.3    | 200000  | 400000   | 2.4 | 7  | 11 |
| BPIFA2   | 1:1  | 1562.5  | 3125.0   | 100000  | 400000   | 1.5 | 7  | 32 |
| SCPEP1   | 1:1  | 195.3   | 390.6    | 100000  | 400000   | 2.4 | 7  | 9  |
| SCN4B    | 1:1  |         |          |         |          |     | 9  | 26 |
| PRRT3    | 1:1  | 781.3   | 1562.5   | 200000  | 800000   | 2.1 | 6  | 11 |
| ADAMTSL4 | 1:1  |         |          |         |          |     | 8  | 13 |
| MECR     | 1:1  | 6250.0  | 6250.0   | 400000  | 800000   | 1.8 |    |    |
| ENPP6    | 1:1  | 12.2    | 24.4     | 6250    | 25000    | 2.4 | 8  | 22 |
| LAMB1    | 1:1  | 195.3   | 390.6    | 50000   | 400000   | 2.1 | 6  | 12 |
| DLL4     | 1:1  |         |          |         |          |     | 17 | 5  |
| GIP      | 1:1  |         |          |         |          |     | 13 | 12 |
| EPPK1    | 1:1  | 390.6   | 781.3    | 100000  | 400000   | 2.1 | 7  | 18 |
| FSTL1    | 1:1  |         |          |         |          |     | 5  | 9  |
| GATD3    | 1:1  |         |          |         |          |     |    |    |
| MYL3     | 1:1  | 390.6   | 781.3    | 50000   | 800000   | 1.8 | 7  | 21 |
| NIT1     | 1:1  | 6250.0  | 6250.0   | 400000  | 800000   | 1.8 | 6  | 13 |
| ECHDC3   | 1:10 | 24.4    | 48.8     | 25000   | 100000   | 2.7 | 4  | 14 |
| NT5C     | 1:10 | 12500.0 | 12500.0  | 800000  | 800000   | 1.8 | 5  | 21 |
| GALNT5   | 1:10 | 6250.0  | 6250.0   | 400000  | 800000   | 1.8 | 10 | 10 |
| MYBPC1   | 1:10 | 781.3   | 1562.5   | 200000  | 800000   | 2.1 | 7  | 24 |
| PTGR1    | 1:10 | 390.6   | 390.6    | 50000   | 200000   | 2.1 | 5  | 17 |
| GRHPR    | 1:10 | 1562.5  | 1562.5   | 200000  | 800000   | 2.1 | 9  | 18 |
| GGACT    | 1:10 | 48.8    | 48.8     | 1563    | 12500    | 1.5 | 12 | 28 |

|           |      |         |         |        |        |     |    |    |
|-----------|------|---------|---------|--------|--------|-----|----|----|
| BNIP2     | 1:10 | 3125.0  | 3125.0  | 100000 | 800000 | 1.5 | 11 | 13 |
| CD80      | 1:10 |         |         |        |        |     | 17 | 18 |
| SPESP1    | 1:10 | 1562.5  | 3125.0  | 200000 | 800000 | 1.8 | 8  | 24 |
| MMP15     | 1:10 |         |         |        |        |     | 5  | 2  |
| SARG      | 1:10 | 97.7    | 195.3   | 12500  | 100000 | 1.8 |    |    |
| UBE2L6    | 1:10 | 1562.5  | 1562.5  | 50000  | 200000 | 1.5 | 7  | 11 |
| FCAMR     | 1:10 | 6250.0  | 6250.0  | 400000 | 800000 | 1.8 | 6  | 22 |
| DTYMK     | 1:10 | 3125.0  | 6250.0  | 400000 | 800000 | 1.8 | 5  | 21 |
| SCRG1     | 1:10 | 3125.0  | 3125.0  | 100000 | 400000 | 1.5 | 10 | 12 |
| VIT       | 1:10 | 195.3   | 390.6   | 25000  | 100000 | 1.8 | 6  | 16 |
| EEF1D     | 1:10 | 3125.0  | 3125.0  | 400000 | 800000 | 2.1 | 4  | 12 |
| HBZ       | 1:10 |         |         |        |        |     | 7  | 31 |
| NIT2      | 1:10 |         |         |        |        |     | 10 | 32 |
| HEPH      | 1:10 | 97.7    | 97.7    | 12500  | 50000  | 2.1 | 5  | 7  |
| MAN2B2    | 1:10 | 390.6   | 781.3   | 50000  | 800000 | 1.8 | 4  | 12 |
| TPK1      | 1:10 | 24.4    | 48.8    | 12500  | 100000 | 2.4 | 5  | 8  |
| COCH      | 1:10 | 195.3   | 195.3   | 25000  | 200000 | 2.1 | 5  | 9  |
| SYTL4     | 1:10 |         |         |        |        |     | 13 | 26 |
| GMFG      | 1:10 | 781.3   | 781.3   | 50000  | 200000 | 1.8 | 6  | 23 |
| MAMDC2    | 1:10 | 195.3   | 195.3   | 50000  | 200000 | 2.4 | 5  | 10 |
| SRPX      | 1:10 | 781.3   | 781.3   | 50000  | 200000 | 1.8 | 6  | 16 |
| IGSF9     | 1:10 | 97.7    | 97.7    | 25000  | 100000 | 2.4 | 8  | 19 |
| BPIFB2    | 1:10 | 1562.5  | 3125.0  | 100000 | 200000 | 1.5 |    |    |
| CRYBB1    | 1:10 | 12.2    | 12.2    | 6250   | 25000  | 2.7 | 3  | 16 |
| TIMP2     | 1:10 |         |         |        |        |     | 11 | 10 |
| CPXM2     | 1:10 | 12500.0 | 12500.0 | 800000 | 800000 | 1.8 | 8  | 18 |
| PDAP1     | 1:10 | 3125.0  | 6250.0  | 200000 | 800000 | 1.5 |    |    |
| COX6B1    | 1:10 |         |         |        |        |     | 10 | 20 |
| PTPRB     | 1:10 | 781.3   | 3125.0  | 100000 | 200000 | 1.5 | 6  | 10 |
| TCOF1     | 1:10 | 390.6   | 781.3   | 50000  | 200000 | 1.8 | 7  | 9  |
| GGCT      | 1:10 | 195.3   | 390.6   | 25000  | 200000 | 1.8 | 9  | 29 |
| RAB11FIP3 | 1:10 | 48.8    | 97.7    | 25000  | 200000 | 2.4 | 6  | 27 |
| TCTN3     | 1:10 | 1562.5  | 1562.5  | 100000 | 800000 | 1.8 | 6  | 12 |
| L3HYPDH   | 1:10 | 781.3   | 781.3   | 50000  | 200000 | 1.8 | 9  | 30 |
| CHMP6     | 1:10 | 781.3   | 781.3   | 100000 | 800000 | 2.1 | 8  | 22 |
| MYDGF     | 1:10 | 97.7    | 195.3   | 12500  | 200000 | 1.8 | 5  | 29 |
| PKD1      | 1:10 | 24.4    | 97.7    | 6250   | 25000  | 1.8 | 6  | 10 |
| NPL       | 1:10 | 781.3   | 1562.5  | 100000 | 400000 | 1.8 | 5  | 18 |
| BCAT1     | 1:10 | 1562.5  | 1562.5  | 100000 | 800000 | 1.8 | 8  | 10 |
| ASPN      | 1:10 |         |         |        |        |     | 8  | 26 |
| SGSH      | 1:10 | 97.7    | 97.7    | 12500  | 50000  | 2.1 | 4  | 6  |
| LECT2     | 1:10 | 6250.0  | 6250.0  | 800000 | 800000 | 2.1 | 9  | 35 |
| PTPRZ1    | 1:10 | 781.3   | 781.3   | 100000 | 200000 | 2.1 | 7  | 10 |
| CDA       | 1:10 | 1562.5  | 3125.0  | 100000 | 800000 | 1.5 | 9  | 13 |
| NGFR      | 1:10 | 390.6   | 390.6   | 25000  | 100000 | 1.8 | 14 | 22 |
| LILRA6    | 1:10 | 97.7    | 195.3   | 25000  | 200000 | 2.1 | 6  | 21 |
| EHBP1     | 1:10 | 195.3   | 390.6   | 25000  | 100000 | 1.8 | 8  | 20 |
| MELTF     | 1:10 | 97.7    | 195.3   | 50000  | 200000 | 2.4 | 5  | 8  |
| PGD       | 1:10 | 6250.0  | 6250.0  | 200000 | 800000 | 1.5 | 8  | 19 |
| GET3      | 1:10 | 1562.5  | 3125.0  | 400000 | 800000 | 2.1 | 8  | 26 |
| ELN       | 1:10 |         |         |        |        |     | 11 | 16 |
| RILPL2    | 1:10 | 195.3   | 390.6   | 50000  | 200000 | 2.1 | 6  | 35 |

|          |       |        |         |        |        |     |    |    |
|----------|-------|--------|---------|--------|--------|-----|----|----|
| FAM20A   | 1:10  | 390.6  | 390.6   | 100000 | 800000 | 2.4 | 5  | 14 |
| ADGRF5   | 1:10  | 1562.5 | 3125.0  | 200000 | 800000 | 1.8 | 6  | 8  |
| LRRC59   | 1:10  |        |         |        |        |     | 12 | 29 |
| CMC1     | 1:10  |        |         |        |        |     | 6  | 29 |
| SERPINE2 | 1:10  |        |         |        |        |     | 5  | 17 |
| TIMM10   | 1:10  | 781.3  | 781.3   | 50000  | 200000 | 1.8 | 10 | 10 |
| RAB10    | 1:10  |        |         |        |        |     | 13 | 16 |
| ACADSB   | 1:10  | 3125.0 | 3125.0  | 400000 | 800000 | 2.1 | 12 | 24 |
| ADAMTSL5 | 1:10  | 390.6  | 390.6   | 50000  | 100000 | 2.1 | 11 | 19 |
| FABP3    | 1:10  |        |         |        |        |     | 8  | 16 |
| TOMM20   | 1:10  | 97.7   | 195.3   | 25000  | 100000 | 2.1 | 12 | 29 |
| UPB1     | 1:10  | 781.3  | 781.3   | 50000  | 200000 | 1.8 | 14 | 13 |
| PPM1F    | 1:10  | 6250.0 | 6250.0  | 800000 | 800000 | 2.1 | 10 | 26 |
| RAB27B   | 1:10  | 195.3  | 390.6   | 100000 | 400000 | 2.4 |    |    |
| PDIA4    | 1:100 | 390.6  | 390.6   | 50000  | 100000 | 2.1 | 8  | 27 |
| BDNF     | 1:100 | 48.8   | 195.3   | 50000  | 100000 | 2.4 | 9  | 28 |
| DDT      | 1:100 |        |         |        |        |     | 10 | 19 |
| ADAMTSL2 | 1:100 | 3125.0 | 3125.0  | 400000 | 800000 | 2.1 | 9  | 12 |
| SLC4A1   | 1:100 |        |         |        |        |     |    |    |
| LCP1     | 1:100 | 1562.5 | 1562.5  | 400000 | 800000 | 2.4 | 10 | 19 |
| AMDHD2   | 1:100 | 3125.0 | 25000.0 | 800000 | 800000 | 1.5 | 8  | 19 |
| ISM2     | 1:100 | 195.3  | 195.3   | 25000  | 200000 | 2.1 | 11 | 22 |
| KLK3     | 1:100 | 195.3  | 195.3   | 25000  | 200000 | 2.1 | 5  | 5  |
| CTLA4    | 1:100 | 97.7   | 97.7    | 25000  | 100000 | 2.4 | 1  |    |
| CEACAM6  | 1:100 | 3125.0 | 3125.0  | 400000 | 800000 | 2.1 | 10 | 15 |
| LILRA3   | 1:100 |        |         |        |        |     | 5  | 13 |
| MUC2     | 1:100 | 6.1    | 12.2    | 6250   | 25000  | 2.7 | 7  | 30 |
| FBLN2    | 1:100 | 195.3  | 195.3   | 25000  | 100000 | 2.1 | 4  | 9  |
| COL3A1   | 1:100 | 97.7   | 195.3   | 25000  | 100000 | 2.1 | 6  | 10 |
| SBSN     | 1:100 |        |         |        |        |     | 7  | 19 |
| CSPG4    | 1:100 | 97.7   | 97.7    | 25000  | 100000 | 2.4 | 5  | 6  |
| COL15A1  | 1:100 | 195.3  | 195.3   | 12500  | 50000  | 1.8 | 5  | 10 |
| FGFBP2   | 1:100 | 195.3  | 195.3   | 25000  | 50000  | 2.1 | 4  | 15 |
| CD248    | 1:100 | 97.7   | 195.3   | 25000  | 100000 | 2.1 | 5  | 10 |
| CTHRC1   | 1:100 | 781.3  | 1562.5  | 50000  | 200000 | 1.5 | 8  | 13 |
| PRAP1    | 1:100 |        |         |        |        |     | 4  | 12 |
| NPTX2    | 1:100 | 48.8   | 97.7    | 25000  | 100000 | 2.4 | 7  | 14 |
| BGLAP    | 1:100 | 781.3  | 1562.5  | 100000 | 400000 | 1.8 | 6  | 16 |
| SHISA5   | 1:100 | 390.6  | 390.6   | 25000  | 50000  | 1.8 | 6  | 9  |
| TWF2     | 1:100 | 781.3  | 781.3   | 200000 | 800000 | 2.4 |    |    |
| PPIF     | 1:100 | 6250.0 | 6250.0  | 200000 | 800000 | 1.5 | 10 | 28 |
| TNFSF8   | 1:100 | 12.2   | 24.4    | 12500  | 50000  | 2.7 | 11 | 11 |
| PRG3     | 1:100 | 97.7   | 195.3   | 25000  | 200000 | 2.1 | 5  | 14 |
| MYH9     | 1:100 |        |         |        |        |     |    |    |
| PRG2     | 1:100 | 97.7   | 97.7    | 25000  | 50000  | 2.4 | 5  | 15 |
| PTPRC    | 1:100 | 48.8   | 48.8    | 12500  | 100000 | 2.4 | 7  | 7  |
| TREH     | 1:100 | 48.8   | 97.7    | 25000  | 800000 | 2.4 | 5  | 20 |
| CYTL1    | 1:100 | 390.6  | 390.6   | 25000  | 200000 | 1.8 | 6  | 12 |
| CILP     | 1:100 |        |         |        |        |     | 9  | 26 |
| CLEC4M   | 1:100 | 24.4   | 48.8    | 6250   | 25000  | 2.1 | 6  | 14 |
| CPQ      | 1:100 | 195.3  | 195.3   | 50000  | 200000 | 2.4 | 4  | 11 |
| CHGA     | 1:100 | 1562.5 | 3125.0  | 200000 | 800000 | 1.8 | 9  | 22 |



|          |       |         |          |         |          |     |    |    |
|----------|-------|---------|----------|---------|----------|-----|----|----|
| NOTCH2   | 1:100 | 48.8    | 97.7     | 6250    | 50000    | 1.8 | 5  | 6  |
| ITGBL1   | 1:100 | 97.7    | 195.3    | 25000   | 100000   | 2.1 | 6  | 13 |
| HPSE     | 1:100 |         |          |         |          |     | 6  | 33 |
| IGDCC4   | 1:100 | 48.8    | 48.8     | 6250    | 50000    | 2.1 | 6  | 8  |
| POSTN    | 1:100 |         |          |         |          |     | 9  | 15 |
| CELA2A   | 1:100 | 48.8    | 48.8     | 25000   | 100000   | 2.7 | 5  | 9  |
| TNN      | 1:100 | 50000.0 | 100000.0 | 6400000 | 12800000 | 1.8 | 7  | 8  |
| GM2A     | 1:100 | 781.3   | 1562.5   | 50000   | 200000   | 1.5 | 7  | 17 |
| TALDO1   | 1:100 | 97.7    | 195.3    | 25000   | 200000   | 2.1 | 4  | 8  |
| STAB2    | 1:100 | 390.6   | 1562.5   | 100000  | 800000   | 1.8 | 5  | 9  |
| SLURP1   | 1:100 | 1562.5  | 1562.5   | 100000  | 800000   | 1.8 | 7  | 9  |
| CKB      | 1:100 |         |          |         |          |     | 9  | 15 |
| ASAH1    | 1:100 | 195.3   | 390.6    | 25000   | 200000   | 1.8 | 8  | 18 |
| LAMP1    | 1:100 | 97.7    | 390.6    | 50000   | 100000   | 2.1 | 7  | 6  |
| PSAP     | 1:100 | 1562.5  | 1562.5   | 50000   | 200000   | 1.5 | 6  | 7  |
| GOT1     | 1:100 | 390.6   | 390.6    | 25000   | 50000    | 1.8 | 8  | 12 |
| NPC2     | 1:100 | 390.6   | 390.6    | 12500   | 50000    | 1.5 | 5  | 8  |
| NCF2     | 1:1   | 0.8     | 3.1      | 12500   | 25000    | 3.6 | 8  | 6  |
| IL15     | 1:1   | 1.5     | 3.1      | 50000   | 400000   | 4.2 | 9  | 4  |
| BCR      | 1:1   | 781.3   | 1562.5   | 200000  | 800000   | 2.1 | 7  | 4  |
| MAP2K6   | 1:1   | 24.4    | 48.8     | 25000   | 200000   | 2.7 | 9  | 10 |
| DAPP1    | 1:1   | 3.1     | 12.2     | 25000   | 200000   | 3.3 | 10 | 9  |
| IL4R     | 1:1   | 3.1     | 6.1      | 25000   | 100000   | 3.6 | 10 | 12 |
| PIK3AP1  | 1:1   | 781.3   | 1562.5   | 400000  | 800000   | 2.4 | 14 | 13 |
| CD4      | 1:1   | 97.7    | 97.7     | 400000  | 800000   | 3.6 | 8  | 9  |
| KLRD1    | 1:1   | 1.5     | 3.1      | 6250    | 25000    | 3.3 | 3  | 4  |
| BSG      | 1:1   | 0.2     | 0.4      | 12500   | 50000    | 4.5 | 3  | 3  |
| SERPINB8 | 1:1   | 12.2    | 12.2     | 12500   | 50000    | 3.0 | 6  | 6  |
| VEGFD    | 1:1   | 12.2    | 24.4     | 25000   | 100000   | 3.0 | 4  | 4  |
| AGRP     | 1:1   | 48.8    | 97.7     | 50000   | 400000   | 2.7 | 6  | 14 |
| CCL3     | 1:1   | 0.2     | 0.4      | 781     | 1563     | 3.3 | 9  | 5  |
| TBC1D5   | 1:1   |         |          |         |          |     | 7  | 7  |
| EGLN1    | 1:1   | 6.1     | 12.2     | 12500   | 25000    | 3.0 | 9  | 5  |
| NUDC     | 1:1   | 24.4    | 97.7     | 100000  | 800000   | 3.0 | 4  | 5  |
| SELPLG   | 1:1   | 3.1     | 6.1      | 6250    | 25000    | 3.0 | 9  | 5  |
| KLRB1    | 1:1   | 0.8     | 1.5      | 3125    | 12500    | 3.3 | 3  | 2  |
| CEACAM21 | 1:1   | 0.4     | 0.8      | 1563    | 12500    | 3.3 | 8  | 6  |
| IL17RB   | 1:1   | 24.4    | 24.4     | 25000   | 400000   | 3.0 | 8  | 8  |
| IL5RA    | 1:1   | 6.1     | 12.2     | 25000   | 400000   | 3.3 | 9  | 8  |
| C1QA     | 1:1   | 29.2    | 58.3     | 119500  | 239000   | 3.3 | 4  | 5  |
| LY9      | 1:1   | 3.1     | 6.1      | 12500   | 50000    | 3.3 | 3  | 4  |
| HEXIM1   | 1:1   | 1.5     | 3.1      | 781     | 1563     | 2.4 | 10 | 7  |
| PCDH1    | 1:1   | 195.3   | 390.6    | 200000  | 800000   | 2.7 | 4  | 4  |
| LY75     | 1:1   | 24.4    | 48.8     | 50000   | 400000   | 3.0 | 10 | 7  |
| TLR3     | 1:1   | 1.5     | 3.1      | 12500   | 100000   | 3.6 | 4  | 3  |
| IDS      | 1:1   | 97.7    | 195.3    | 400000  | 800000   | 3.3 | 3  | 4  |
| CTSO     | 1:1   | 48.8    | 97.7     | 50000   | 400000   | 2.7 | 4  | 4  |
| HGF      | 1:1   | 3.1     | 12.2     | 100000  | 200000   | 3.9 | 4  | 3  |
| MERTK    | 1:1   | 97.7    | 195.3    | 100000  | 800000   | 2.7 | 5  | 6  |
| CCL11    | 1:1   | 1.5     | 3.1      | 25000   | 200000   | 3.9 | 3  | 4  |
| IL12RB1  | 1:1   | 97.7    | 195.3    | 100000  | 800000   | 2.7 | 8  | 17 |
| PARP1    | 1:1   | 48.8    | 97.7     | 50000   | 200000   | 2.7 | 7  | 14 |

|          |     |       |       |        |         |     |    |    |
|----------|-----|-------|-------|--------|---------|-----|----|----|
| RABGAP1L | 1:1 | 48.8  | 48.8  | 25000  | 200000  | 2.7 | 10 | 19 |
| MYO9B    | 1:1 |       |       |        |         |     | 10 | 19 |
| IL33     | 1:1 | 6.1   | 24.4  | 6250   | 25000   | 2.4 | 8  | 58 |
| IL2RB    | 1:1 | 97.7  | 390.6 | 200000 | 800000  | 2.7 | 10 | 37 |
| LILRB4   | 1:1 | 97.7  | 195.3 | 100000 | 800000  | 2.7 | 8  | 15 |
| IL1B     | 1:1 | 0.4   | 1.5   | 25000  | 100000  | 4.2 | 10 | 20 |
| IL2      | 1:1 | 0.4   | 0.8   | 6250   | 25000   | 3.9 | 7  | 20 |
| SCGN     | 1:1 | 97.7  | 390.6 | 200000 | 800000  | 2.7 | 9  | 11 |
| CXCL14   | 1:1 |       |       |        |         |     | 8  | 15 |
| IL22RA1  | 1:1 | 0.4   | 1.5   | 3125   | 12500   | 3.3 | 8  | 22 |
| IL10     | 1:1 | 6.1   | 24.4  | 200000 | 800000  | 3.9 | 10 | 18 |
| CEP164   | 1:1 | 12.2  | 48.8  | 12500  | 25000   | 2.4 | 7  | 18 |
| LAP3     | 1:1 |       |       |        |         |     | 12 | 20 |
| NBN      | 1:1 |       |       |        |         |     | 11 | 9  |
| RGS8     | 1:1 |       |       |        |         |     | 18 | 14 |
| MVK      | 1:1 | 390.6 | 781.3 | 400000 | 800000  | 2.7 | 11 | 12 |
| WNT9A    | 1:1 | 3.1   | 6.1   | 25000  | 100000  | 3.6 | 9  | 11 |
| PRKAB1   | 1:1 | 48.8  | 97.7  | 25000  | 100000  | 2.4 | 7  | 21 |
| IL11     | 1:1 | 6.1   | 12.2  | 6250   | 100000  | 2.7 | 9  | 9  |
| JUN      | 1:1 | 390.6 | 781.3 | 100000 | 3200000 | 2.1 | 11 | 14 |
| ACTN4    | 1:1 | 390.6 | 781.3 | 100000 | 400000  | 2.1 | 7  | 14 |
| IL17F    | 1:1 | 1.5   | 6.1   | 6250   | 25000   | 3.0 | 8  | 18 |
| IL4      | 1:1 | 0.8   | 1.5   | 6250   | 25000   | 3.6 | 7  | 33 |
| IL13     | 1:1 | 1.5   | 6.1   | 100000 | 800000  | 4.2 | 9  | 22 |
| RAB37    | 1:1 | 12.2  | 24.4  | 12500  | 100000  | 2.7 | 9  | 19 |
| IL20     | 1:1 | 24.4  | 97.7  | 25000  | 800000  | 2.4 | 7  | 16 |
| FCRL3    | 1:1 | 48.8  | 97.7  | 50000  | 800000  | 2.7 | 8  | 18 |
| AMBN     | 1:1 | 12.2  | 24.4  | 25000  | 400000  | 3.0 | 9  | 15 |
| IL24     | 1:1 | 24.4  | 48.8  | 12500  | 25000   | 2.4 | 14 | 16 |
| PREB     | 1:1 | 390.6 | 781.3 | 200000 | 800000  | 2.4 | 9  | 12 |
| LTO1     | 1:1 | 12.2  | 24.4  | 50000  | 100000  | 3.3 | 8  | 17 |
| PADI2    | 1:1 | 48.8  | 97.7  | 400000 | 800000  | 3.6 | 8  | 15 |
| SIT1     | 1:1 | 0.04  | 4.5   | 18500  | 37000   | 3.6 | 8  | 16 |
| IFNLR1   | 1:1 | 0.8   | 1.5   | 25000  | 100000  | 4.2 | 11 | 5  |
| ALDH3A1  | 1:1 | 0.8   | 3.1   | 3125   | 25000   | 3.0 | 10 | 10 |
| BACH1    | 1:1 | 12.2  | 24.4  | 25000  | 200000  | 3.0 | 8  | 7  |
| AOC1     | 1:1 | 97.7  | 195.3 | 100000 | 800000  | 2.7 | 10 | 21 |
| IL17A    | 1:1 | 6.1   | 12.2  | 50000  | 100000  | 3.6 | 7  | 7  |
| YTHDF3   | 1:1 | 12.2  | 24.4  | 12500  | 100000  | 2.7 | 9  | 32 |
| SPINK4   | 1:1 |       |       |        |         |     | 10 | 6  |
| IL3RA    | 1:1 |       |       |        |         |     | 7  | 28 |
| IL17D    | 1:1 | 3.1   | 6.1   | 6250   | 25000   | 3.0 | 8  | 14 |
| IL17C    | 1:1 | 12.2  | 24.4  | 50000  | 100000  | 3.3 | 10 | 14 |
| MILR1    | 1:1 |       |       |        |         |     | 7  | 21 |
| PNPT1    | 1:1 |       |       |        |         |     | 9  | 11 |
| ARTN     | 1:1 | 0.8   | 1.5   | 6250   | 25000   | 3.6 | 9  | 9  |
| NRTN     | 1:1 | 0.8   | 1.5   | 3125   | 25000   | 3.3 | 15 | 31 |
| CXCL12   | 1:1 |       |       |        |         |     | 8  | 17 |
| PRKCQ    | 1:1 |       |       |        |         |     | 13 | 18 |
| TRAF2    | 1:1 |       |       |        |         |     | 9  | 4  |
| WAS      | 1:1 |       |       |        |         |     | 8  | 31 |
| TNFAIP8  | 1:1 |       |       |        |         |     | 11 | 16 |

|           |     |        |        |        |         |     |    |    |
|-----------|-----|--------|--------|--------|---------|-----|----|----|
| PAPPA     | 1:1 | 195.3  | 390.6  | 50000  | 200000  | 2.1 | 12 | 15 |
| DGKZ      | 1:1 | 3.1    | 6.1    | 3125   | 25000   | 2.7 | 8  | 13 |
| EIF5A     | 1:1 |        |        |        |         |     | 11 | 10 |
| ITM2A     | 1:1 |        |        |        |         |     | 7  | 9  |
| PSPN      | 1:1 | 3.1    | 6.1    | 12500  | 100000  | 3.3 | 11 | 5  |
| TPT1      | 1:1 | 1562.5 | 6250.0 | 400000 | 800000  | 1.8 | 16 | 19 |
| FGF2      | 1:1 | 12.2   | 12.2   | 12500  | 400000  | 3.0 | 4  | 6  |
| NUB1      | 1:1 | 3.1    | 6.1    | 12500  | 25000   | 3.3 | 8  | 12 |
| LRRN1     | 1:1 | 12.2   | 24.4   | 25000  | 400000  | 3.0 | 6  | 17 |
| TNF       | 1:1 | 1.5    | 3.1    | 6250   | 100000  | 3.3 | 9  | 15 |
| IL10RA    | 1:1 | 1.5    | 6.1    | 400000 | 800000  | 4.8 | 7  | 17 |
| TNFRSF13C | 1:1 | 12.2   | 24.4   | 6250   | 100000  | 2.4 | 9  | 13 |
| ARNT      | 1:1 |        |        |        |         |     | 8  | 14 |
| NCLN      | 1:1 |        |        |        |         |     | 6  | 17 |
| IL20RA    | 1:1 | 0.8    | 1.5    | 12500  | 400000  | 3.9 | 8  | 13 |
| SULT2A1   | 1:1 | 195.3  | 390.6  | 200000 | 400000  | 2.7 | 10 | 8  |
| METAP1D   | 1:1 | 0.4    | 0.8    | 12500  | 25000   | 4.2 | 8  | 9  |
| FABP9     | 1:1 | 3.1    | 12.2   | 12500  | 25000   | 3.0 | 10 | 7  |
| SH2D1A    | 1:1 | 6.1    | 12.2   | 6250   | 25000   | 2.7 | 8  | 5  |
| NFATC3    | 1:1 | 6.1    | 24.4   | 3125   | 12500   | 2.1 | 8  | 9  |
| SRPK2     | 1:1 | 3.1    | 6.1    | 1563   | 12500   | 2.4 | 5  | 11 |
| HLA-DRA   | 1:1 | 390.6  | 781.3  | 400000 | 800000  | 2.7 | 10 | 9  |
| BTN3A2    | 1:1 | 48.8   | 97.7   | 200000 | 800000  | 3.3 | 10 | 7  |
| BCL2L11   | 1:1 |        |        |        |         |     | 9  | 8  |
| IL1A      | 1:1 | 1.5    | 3.1    | 3148   | 12594   | 3.0 | 8  | 47 |
| IFNG      | 1:1 | 1.5    | 6.1    | 12500  | 50000   | 3.3 | 15 | 22 |
| ICA1      | 1:1 | 48.8   | 195.3  | 100000 | 400000  | 2.7 | 8  | 16 |
| VASH1     | 1:1 | 195.3  | 390.6  | 100000 | 400000  | 2.4 | 6  | 9  |
| IL5       | 1:1 | 6.1    | 12.2   | 100000 | 400000  | 3.9 | 10 | 21 |
| SPRY2     | 1:1 | 24.4   | 97.7   | 50000  | 400000  | 2.7 | 9  | 15 |
| IL15RA    | 1:1 | 6.1    | 12.2   | 3125   | 25000   | 2.4 | 7  | 23 |
| FGF5      | 1:1 | 3.1    | 6.1    | 50000  | 100000  | 3.9 | 11 | 19 |
| TANK      | 1:1 | 48.8   | 195.3  | 100000 | 400000  | 2.7 | 8  | 15 |
| NFATC1    | 1:1 | 390.6  | 781.3  | 400000 | 800000  | 2.7 | 10 | 9  |
| CSF3      | 1:1 | 97.7   | 390.6  | 400000 | 800000  | 3.0 | 9  | 14 |
| AMN       | 1:1 |        |        |        |         |     | 8  | 19 |
| SLAMF1    | 1:1 | 781.3  | 1562.5 | 400000 | 800000  | 2.4 | 14 | 17 |
| IRAK1     | 1:1 | 781.3  | 3125.0 | 400000 | 800000  | 2.1 | 11 | 14 |
| FOXO1     | 1:1 |        |        |        |         |     | 8  | 8  |
| GALNT3    | 1:1 | 781.3  | 1562.5 | 400000 | 800000  | 2.4 | 11 | 14 |
| PRDX3     | 1:1 |        |        |        |         |     | 8  | 12 |
| GBP2      | 1:1 | 390.6  | 781.3  | 400000 | 800000  | 2.7 | 12 | 20 |
| JCHAIN    | 1:1 |        |        |        |         |     | 13 | 19 |
| BID       | 1:1 | 781.3  | 3125.0 | 400000 | 3200000 | 2.1 | 11 | 11 |
| SCRN1     | 1:1 | 48.8   | 97.7   | 50000  | 400000  | 2.7 | 9  | 12 |
| SLC39A5   | 1:1 |        |        |        |         |     | 10 | 9  |
| ENAH      | 1:1 | 48.8   | 48.8   | 6250   | 25000   | 2.1 | 10 | 20 |
| IKBKG     | 1:1 | 3.1    | 12.2   | 12500  | 25000   | 3.0 | 13 | 14 |
| ITGB6     | 1:1 | 1.5    | 3.1    | 6250   | 25000   | 3.3 | 8  | 14 |
| PROK1     | 1:1 | 3.1    | 12.2   | 12500  | 25000   | 3.0 | 9  | 5  |
| IL1RL2    | 1:1 | 0.8    | 1.5    | 6250   | 100000  | 3.6 | 8  | 16 |
| IL6       | 1:1 | 0.2    | 0.4    | 3125   | 25000   | 3.9 | 10 | 14 |

|           |     |         |         |         |         |     |    |    |
|-----------|-----|---------|---------|---------|---------|-----|----|----|
| MLN       | 1:1 | 390.6   | 781.3   | 200000  | 400000  | 2.4 | 12 | 10 |
| FXYD5     | 1:1 | 6.1     | 12.2    | 3125    | 100000  | 2.4 | 8  | 13 |
| SIGLEC10  | 1:1 | 12.2    | 48.8    | 200000  | 800000  | 3.6 | 8  | 4  |
| PSIP1     | 1:1 |         |         |         |         |     | 9  | 8  |
| TRIM21    | 1:1 | 24.4    | 97.7    | 400000  | 800000  | 3.6 | 12 | 9  |
| ISM1      | 1:1 | 97.7    | 195.3   | 200000  | 400000  | 3.0 | 10 | 10 |
| IL7       | 1:1 | 1.5     | 3.1     | 6250    | 12500   | 3.3 | 12 | 9  |
| HLA-E     | 1:1 | 12500.0 | 25000.0 | 1600000 | 3200000 | 1.8 | 6  | 4  |
| STX8      | 1:1 | 12.2    | 48.8    | 12500   | 25000   | 2.4 | 4  | 13 |
| LSP1      | 1:1 | 97.7    | 97.7    | 25000   | 400000  | 2.4 | 10 | 8  |
| CLEC4C    | 1:1 | 24.4    | 48.8    | 25000   | 400000  | 2.7 | 8  | 4  |
| OSM       | 1:1 | 0.2     | 0.4     | 781     | 3125    | 3.3 | 12 | 6  |
| SAMD9L    | 1:1 | 195.3   | 390.6   | 200000  | 800000  | 2.7 | 7  | 8  |
| CD200R1   | 1:1 | 6.1     | 12.2    | 25000   | 100000  | 3.3 | 7  | 7  |
| CNTNAP2   | 1:1 | 12.2    | 24.4    | 12500   | 400000  | 2.7 | 10 | 10 |
| ANXA11    | 1:1 | 1562.5  | 3125.0  | 800000  | 800000  | 2.4 | 7  | 9  |
| FCRL6     | 1:1 | 97.7    | 195.3   | 200000  | 800000  | 3.0 | 10 | 5  |
| NPPC      | 1:1 | 12.2    | 24.4    | 12500   | 25000   | 2.7 | 11 | 8  |
| BANK1     | 1:1 | 195.3   | 390.6   | 200000  | 400000  | 2.7 | 9  | 16 |
| CD83      | 1:1 | 1.5     | 3.1     | 12500   | 25000   | 3.6 | 9  | 6  |
| MAPK9     | 1:1 |         |         |         |         |     | 12 | 13 |
| CCL28     | 1:1 | 97.7    | 195.3   | 100000  | 400000  | 2.7 | 11 | 12 |
| ARHGEF12  | 1:1 | 781.3   | 3125.0  | 400000  | 800000  | 2.1 | 8  | 9  |
| GOPC      | 1:1 | 12.2    | 24.4    | 12500   | 25000   | 2.7 | 7  | 16 |
| PTPRM     | 1:1 | 97.7    | 195.3   | 200000  | 800000  | 3.0 | 11 | 11 |
| CD40LG    | 1:1 | 0.8     | 1.5     | 6250    | 12500   | 3.6 | 4  | 4  |
| MGMT      | 1:1 | 195.3   | 390.6   | 100000  | 400000  | 2.4 | 12 | 13 |
| PSMG3     | 1:1 | 390.6   | 781.3   | 200000  | 400000  | 2.4 | 9  | 10 |
| DPP10     | 1:1 | 6.1     | 12.2    | 25000   | 200000  | 3.3 | 9  | 9  |
| HSD11B1   | 1:1 |         |         |         |         |     | 9  | 7  |
| EDAR      | 1:1 | 0.4     | 0.8     | 781     | 12500   | 3.0 | 9  | 5  |
| COL9A1    | 1:1 | 6.1     | 12.2    | 12500   | 25000   | 3.0 | 11 | 6  |
| PLXNA4    | 1:1 | 24.4    | 97.7    | 50000   | 400000  | 2.7 | 12 | 6  |
| EPO       | 1:1 | 3.9     | 7.8     | 1000    | 4000    | 2.1 | 11 | 11 |
| ITGA6     | 1:1 |         |         |         |         |     | 9  | 7  |
| CCL7      | 1:1 | 0.4     | 0.8     | 781     | 25000   | 3.0 | 10 | 8  |
| NCR1      | 1:1 | 3.1     | 6.1     | 12500   | 25000   | 3.3 | 9  | 6  |
| LTA       | 1:1 | 0.8     | 1.5     | 3125    | 12500   | 3.3 | 8  | 4  |
| CASP2     | 1:1 | 195.3   | 390.6   | 200000  | 800000  | 2.7 | 7  | 5  |
| FCAR      | 1:1 | 0.8     | 3.1     | 12500   | 25000   | 3.6 | 9  | 9  |
| IRAK4     | 1:1 | 390.6   | 1562.5  | 400000  | 800000  | 2.4 | 9  | 14 |
| CLEC4G    | 1:1 | 3.1     | 6.1     | 50000   | 200000  | 3.9 | 10 | 6  |
| HPCAL1    | 1:1 | 48.8    | 97.7    | 50000   | 200000  | 2.7 | 4  | 5  |
| CCL26     | 1:1 | 97.7    | 781.3   | 400000  | 800000  | 2.7 | 15 | 17 |
| ITGA11    | 1:1 | 97.7    | 390.6   | 200000  | 800000  | 2.7 | 10 | 15 |
| NT5C3A    | 1:1 | 97.7    | 195.3   | 200000  | 800000  | 3.0 | 9  | 7  |
| KRT19     | 1:1 | 48.8    | 97.7    | 100000  | 400000  | 3.0 | 8  | 9  |
| RAB6A     | 1:1 | 48.8    | 97.7    | 200000  | 800000  | 3.3 | 8  | 8  |
| CD84      | 1:1 | 24.4    | 48.8    | 12500   | 200000  | 2.4 | 9  | 7  |
| CXADR     | 1:1 | 3.1     | 3.1     | 1563    | 12500   | 2.7 | 12 | 7  |
| CD70      | 1:1 | 12.2    | 48.8    | 100000  | 200000  | 3.3 | 10 | 6  |
| MICA_MICB | 1:1 | 6.1     | 12.2    | 12500   | 25000   | 3.0 | 10 | 8  |

|           |     |       |        |         |          |     |    |    |
|-----------|-----|-------|--------|---------|----------|-----|----|----|
| TNFSF11   | 1:1 | 12.2  | 24.4   | 50000   | 200000   | 3.3 | 11 | 7  |
| CLIP2     | 1:1 | 195.3 | 195.3  | 50000   | 800000   | 2.4 | 13 | 20 |
| TRIM5     | 1:1 |       |        |         |          |     | 10 | 17 |
| PTX3      | 1:1 |       |        |         |          |     | 9  | 7  |
| CKAP4     | 1:1 |       |        |         |          |     | 3  | 6  |
| CXCL6     | 1:1 |       |        |         |          |     | 6  | 13 |
| NTF3      | 1:1 | 0.4   | 0.8    | 3125    | 12500    | 3.6 | 15 | 7  |
| ICAM4     | 1:1 | 781.3 | 1562.5 | 400000  | 800000   | 2.4 | 9  | 5  |
| DECR1     | 1:1 |       |        |         |          |     | 11 | 11 |
| TNFSF10   | 1:1 | 24.4  | 97.7   | 25000   | 50000    | 2.4 | 4  | 4  |
| CLEC4D    | 1:1 | 3.1   | 6.1    | 12500   | 25000    | 3.3 | 10 | 8  |
| NFASC     | 1:1 |       |        |         |          |     | 3  | 2  |
| FLT3LG    | 1:1 | 0.4   | 0.8    | 1563    | 12500    | 3.3 | 6  | 4  |
| IL16      | 1:1 | 1.5   | 3.1    | 3125    | 12500    | 3.0 | 3  | 6  |
| CDSN      | 1:1 | 390.6 | 781.3  | 400000  | 800000   | 2.7 | 4  | 4  |
| AXIN1     | 1:1 | 781.3 | 1562.5 | 400000  | 800000   | 2.4 | 6  | 9  |
| SLAMF7    | 1:1 | 195.3 | 390.6  | 200000  | 800000   | 2.7 | 10 | 6  |
| CLEC4A    | 1:1 | 0.8   | 3.1    | 6250    | 25000    | 3.3 | 9  | 7  |
| LAT       | 1:1 | 48.8  | 97.7   | 25000   | 100000   | 2.4 | 7  | 8  |
| CXCL8     | 1:1 | 0.1   | 0.2    | 1563    | 6250     | 3.9 | 3  | 4  |
| PPP1R9B   | 1:1 | 12.2  | 24.4   | 25000   | 800000   | 3.0 | 7  | 12 |
| CD200     | 1:1 | 6.1   | 12.2   | 3125    | 25000    | 2.4 | 10 | 6  |
| HCLS1     | 1:1 | 195.3 | 195.3  | 25000   | 400000   | 2.1 | 8  | 8  |
| CD244     | 1:1 | 1.5   | 3.1    | 6250    | 25000    | 3.3 | 4  | 5  |
| KYNU      | 1:1 | 48.8  | 48.8   | 400000  | 800000   | 3.9 | 3  | 11 |
| DFFA      | 1:1 | 0.8   | 3.1    | 6250    | 50000    | 3.3 | 5  | 6  |
| IL18R1    | 1:1 | 0.2   | 0.8    | 6250    | 25000    | 3.9 | 3  | 3  |
| ADAM23    | 1:1 | 12.2  | 24.4   | 50000   | 200000   | 3.3 | 5  | 3  |
| LAMP3     | 1:1 | 12.2  | 24.4   | 25000   | 200000   | 3.0 | 5  | 4  |
| IL32      | 1:1 | 0.8   | 3.1    | 12500   | 25000    | 3.6 | 9  | 7  |
| GMPR      | 1:1 |       |        |         |          |     | 4  | 4  |
| CD6       | 1:1 | 1.5   | 1.5    | 6250    | 25000    | 3.6 | 4  | 4  |
| CD22      | 1:1 | 3.1   | 6.1    | 50000   | 200000   | 3.9 | 3  | 3  |
| CXCL17    | 1:1 | 3.1   | 6.1    | 12500   | 50000    | 3.3 | 4  | 4  |
| FKBP1B    | 1:1 | 390.6 | 781.3  | 200000  | 400000   | 2.4 | 5  | 26 |
| GZMA      | 1:1 | 390.6 | 390.6  | 800000  | 800000   | 3.3 | 5  | 5  |
| CD160     | 1:1 | 1.5   | 3.1    | 12500   | 25000    | 3.6 | 3  | 7  |
| TNFRSF4   | 1:1 | 0.8   | 1.5    | 6250    | 12500    | 3.6 | 5  | 4  |
| TGFB1     | 1:1 |       |        |         |          |     | 4  | 4  |
| TPSAB1    | 1:1 | 6.1   | 12.2   | 100000  | 200000   | 3.9 | 4  | 3  |
| EIF4G1    | 1:1 | 12.2  | 24.4   | 25000   | 200000   | 3.0 | 6  | 10 |
| FASLG     | 1:1 | 0.2   | 0.2    | 6250    | 12500    | 4.5 | 4  | 4  |
| CD79B     | 1:1 | 0.8   | 1.5    | 6250    | 25000    | 3.6 | 4  | 4  |
| PTH1R     | 1:1 | 3.1   | 3.1    | 6250    | 25000    | 3.3 | 7  | 8  |
| TNFRSF11A | 1:1 | 0.8   | 1.5    | 6250    | 12500    | 3.6 | 4  | 4  |
| FCRL2     | 1:1 | 24.4  | 48.8   | 50000   | 200000   | 3.0 | 5  | 3  |
| CLEC7A    | 1:1 | 3.1   | 6.1    | 3125    | 12500    | 2.7 | 3  | 5  |
| CLSTN2    | 1:1 | 6.1   | 6.1    | 25000   | 200000   | 3.6 | 5  | 3  |
| IL12B     | 1:1 | 0.4   | 0.8    | 3125    | 12500    | 3.6 | 5  | 4  |
| LIFR      | 1:1 | 6.1   | 48.8   | 12500   | 400000   | 2.4 | 12 | 7  |
| CCL13     | 1:1 | 0.8   | 6.1    | 3125    | 6250     | 2.7 | 5  | 5  |
| ADA       | 1:1 | 781.3 | 1562.5 | 3200000 | 12800000 | 3.3 | 4  | 3  |

|           |      |        |         |         |          |     |    |    |
|-----------|------|--------|---------|---------|----------|-----|----|----|
| PRDX5     | 1:1  | 1562.5 | 3125.0  | 800000  | 800000   | 2.4 | 4  | 25 |
| DNAJA2    | 1:1  | 97.7   | 390.6   | 400000  | 800000   | 3.0 | 6  | 16 |
| VEGFA     | 1:1  | 0.8    | 1.5     | 6250    | 12500    | 3.6 | 7  | 7  |
| TNFSF12   | 1:1  | 12.2   | 24.4    | 100000  | 400000   | 3.6 | 5  | 4  |
| CCL25     | 1:1  | 3.1    | 24.4    | 25000   | 100000   | 3.0 | 5  | 6  |
| GZMB      | 1:1  |        |         |         |          |     | 12 | 7  |
| TGFA      | 1:1  | 0.2    | 0.4     | 1563    | 25000    | 3.6 | 12 | 7  |
| CCL20     | 1:1  | 3.1    | 6.1     | 6250    | 25000    | 3.0 | 4  | 5  |
| MMP1      | 1:1  | 0.8    | 1.5     | 3125    | 12500    | 3.3 | 4  | 5  |
| PGF       | 1:1  | 0.4    | 0.8     | 6250    | 12500    | 3.9 | 4  | 3  |
| ANGPTL4   | 1:10 | 12.2   | 24.4    | 25000   | 50000    | 3.0 | 7  | 4  |
| FGF19     | 1:10 | 3.1    | 6.1     | 12500   | 50000    | 3.3 | 6  | 4  |
| TNFRSF13B | 1:10 | 6.1    | 24.4    | 50000   | 200000   | 3.3 | 8  | 4  |
| CRKL      | 1:10 | 6.1    | 12.2    | 25000   | 100000   | 3.3 | 6  | 8  |
| PLAUR     | 1:10 | 0.2    | 0.4     | 1563    | 6250     | 3.6 | 6  | 4  |
| DNPH1     | 1:10 | 6.1    | 12.2    | 6250    | 12500    | 2.7 | 7  | 8  |
| SPON1     | 1:10 | 48.8   | 97.7    | 100000  | 200000   | 3.0 | 5  | 4  |
| ESM1      | 1:10 | 3.1    | 6.1     | 6250    | 25000    | 3.0 | 8  | 5  |
| PRSS8     | 1:10 | 0.4    | 0.8     | 6250    | 12500    | 3.9 | 8  | 3  |
| AGRN      | 1:10 | 6.1    | 12.2    | 6250    | 12500    | 2.7 | 7  | 5  |
| PTPN6     | 1:10 | 781.3  | 1562.5  | 100000  | 200000   | 1.8 | 6  | 7  |
| CXCL9     | 1:10 | 0.05   | 0.1     | 6250    | 12500    | 4.8 | 7  | 5  |
| ATP5IF1   | 1:10 | 195.3  | 390.6   | 50000   | 200000   | 2.1 | 8  | 7  |
| LHPP      | 1:10 | 0.8    | 1.5     | 12500   | 25000    | 3.9 | 8  | 5  |
| CXCL3     | 1:10 | 12.2   | 48.8    | 50000   | 200000   | 3.0 | 10 | 9  |
| ENPP7     | 1:10 | 0.8    | 1.5     | 12500   | 200000   | 3.9 | 6  | 4  |
| CXCL1     | 1:10 | 0.4    | 0.8     | 6250    | 12500    | 3.9 | 8  | 8  |
| SMOC2     | 1:10 | 24.4   | 48.8    | 50000   | 200000   | 3.0 | 7  | 3  |
| CCL17     | 1:10 | 0.4    | 0.8     | 781     | 3125     | 3.0 | 7  | 14 |
| LGMN      | 1:10 | 0.8    | 3.1     | 6250    | 50000    | 3.3 | 9  | 5  |
| LGALS9    | 1:10 | 48.8   | 97.7    | 50000   | 200000   | 2.7 | 7  | 4  |
| TFF2      | 1:10 | 0.8    | 1.5     | 3125    | 12500    | 3.3 | 8  | 6  |
| CTSC      | 1:10 | 24.4   | 48.8    | 50000   | 200000   | 3.0 | 8  | 12 |
| CD276     | 1:10 | 97.7   | 195.3   | 400000  | 800000   | 3.3 | 7  | 4  |
| CCL23     | 1:10 | 6.1    | 12.2    | 6250    | 25000    | 2.7 | 6  | 8  |
| F2R       | 1:10 | 48.8   | 195.3   | 200000  | 400000   | 3.0 | 8  | 5  |
| TREM2     | 1:10 |        |         |         |          |     | 6  | 10 |
| SHMT1     | 1:10 | 12.2   | 24.4    | 100000  | 400000   | 3.6 | 8  | 5  |
| ANGPT1    | 1:10 | 12.2   | 24.4    | 100000  | 200000   | 3.6 | 6  | 3  |
| CCL22     | 1:10 | 6.1    | 6.1     | 3125    | 12500    | 2.7 | 14 | 20 |
| TNFSF13   | 1:10 | 3.1    | 6.1     | 25000   | 100000   | 3.6 | 5  | 5  |
| PLA2G4A   | 1:10 | 781.3  | 1562.5  | 400000  | 800000   | 2.4 | 6  | 7  |
| PON3      | 1:10 | 390.6  | 390.6   | 200000  | 800000   | 2.7 | 5  | 9  |
| DAG1      | 1:10 | 3.1    | 6.1     | 6250    | 12500    | 3.0 | 7  | 4  |
| SIGLEC1   | 1:10 | 12.2   | 24.4    | 100000  | 200000   | 3.6 | 7  | 4  |
| DNER      | 1:10 | 1.5    | 3.1     | 25000   | 100000   | 3.9 | 5  | 4  |
| MGLL      | 1:10 | 1562.5 | 12500.0 | 3200000 | 12800000 | 2.4 | 9  | 9  |
| CCL21     | 1:10 | 24.4   | 48.8    | 200000  | 800000   | 3.6 | 8  | 4  |
| CD58      | 1:10 | 0.4    | 0.8     | 3125    | 12500    | 3.6 | 6  | 4  |
| CD48      | 1:10 | 6.1    | 12.2    | 100000  | 200000   | 3.9 | 6  | 4  |
| COLEC12   | 1:10 | 1.5    | 3.1     | 6250    | 25000    | 3.3 | 7  | 6  |
| LAIR1     | 1:10 | 0.1    | 0.2     | 391     | 3125     | 3.3 | 7  | 4  |

|           |      |       |        |         |          |     |    |    |
|-----------|------|-------|--------|---------|----------|-----|----|----|
| CSF1      | 1:10 | 0.05  | 0.2    | 3125    | 6250     | 4.2 | 4  | 3  |
| PRELP     | 1:10 | 6.1   | 12.2   | 12500   | 200000   | 3.0 | 6  | 4  |
| EPCAM     | 1:10 | 0.4   | 0.4    | 6250    | 25000    | 4.2 | 7  | 7  |
| EGF       | 1:10 | 0.1   | 0.2    | 781     | 1563     | 3.6 | 13 | 9  |
| CXCL10    | 1:10 | 0.2   | 6.1    | 6250    | 25000    | 3.0 | 7  | 9  |
| SMPDL3A   | 1:10 | 6.1   | 12.2   | 100000  | 200000   | 3.9 | 6  | 4  |
| BTN2A1    | 1:10 | 3.1   | 6.1    | 6250    | 25000    | 3.0 | 7  | 4  |
| SPINT2    | 1:10 | 6.1   | 12.2   | 25000   | 50000    | 3.3 | 8  | 6  |
| ROBO1     | 1:10 | 3.1   | 6.1    | 100000  | 200000   | 4.2 | 6  | 4  |
| MZB1      | 1:10 | 0.4   | 0.8    | 6250    | 50000    | 3.9 | 7  | 2  |
| TIMP3     | 1:10 | 390.6 | 781.3  | 200000  | 400000   | 2.4 | 13 | 13 |
| NCK2      | 1:10 |       |        |         |          |     | 5  | 10 |
| CST7      | 1:10 | 0.4   | 0.8    | 6250    | 12500    | 3.9 | 7  | 5  |
| MATN2     | 1:10 | 24.4  | 48.8   | 25000   | 50000    | 2.7 | 8  | 3  |
| CRLF1     | 1:10 | 390.6 | 781.3  | 100000  | 800000   | 2.1 | 6  | 7  |
| DBNL      | 1:10 | 24.4  | 97.7   | 50000   | 200000   | 2.7 | 10 | 10 |
| AGER      | 1:10 | 0.8   | 3.1    | 6250    | 25000    | 3.3 | 7  | 5  |
| IL10RB    | 1:10 | 1.5   | 6.1    | 3125    | 12500    | 2.7 | 8  | 3  |
| GLOD4     | 1:10 | 0.8   | 3.1    | 6250    | 25000    | 3.3 | 7  | 4  |
| EPHA1     | 1:10 | 3.1   | 6.1    | 50000   | 200000   | 3.9 | 7  | 3  |
| IL1R2     | 1:10 | 0.8   | 1.5    | 6250    | 12500    | 3.6 | 8  | 3  |
| ENPP5     | 1:10 | 6.1   | 6.1    | 3125    | 12500    | 2.7 | 4  | 3  |
| CRIM1     | 1:10 | 1.5   | 3.1    | 6250    | 50000    | 3.3 | 8  | 4  |
| IFNGR1    | 1:10 | 1.5   | 3.1    | 3125    | 12500    | 3.0 | 7  | 4  |
| ERBB3     | 1:10 | 6.1   | 12.2   | 12500   | 50000    | 3.0 | 7  | 5  |
| MMP10     | 1:10 | 0.2   | 0.4    | 6250    | 12500    | 4.2 | 7  | 7  |
| PDLIM7    | 1:10 | 24.4  | 48.8   | 25000   | 50000    | 2.7 | 7  | 11 |
| SCGB1A1   | 1:10 | 390.6 | 781.3  | 400000  | 800000   | 2.7 | 6  | 4  |
| IL1RN     | 1:10 | 0.2   | 0.4    | 1563    | 12500    | 3.6 | 6  | 3  |
| LY6D      | 1:10 | 6.1   | 12.2   | 12500   | 200000   | 3.0 | 9  | 5  |
| IL18      | 1:10 | 0.1   | 0.2    | 6250    | 12500    | 4.5 | 5  | 4  |
| CCL4      | 1:10 | 0.2   | 0.4    | 1563    | 200000   | 3.6 | 7  | 5  |
| NELL2     | 1:10 | 12.2  | 24.4   | 50000   | 100000   | 3.3 | 6  | 2  |
| LTBR      | 1:10 | 0.4   | 0.8    | 6250    | 12500    | 3.9 | 7  | 5  |
| PKLR      | 1:10 | 3.1   | 6.1    | 50000   | 200000   | 3.9 | 6  | 7  |
| MANF      | 1:10 | 3.1   | 6.1    | 12500   | 25000    | 3.3 | 7  | 14 |
| SIRPB1    | 1:10 | 1.5   | 1.5    | 6250    | 25000    | 3.6 | 4  | 4  |
| CCN2      | 1:10 | 24.4  | 48.8   | 25000   | 200000   | 2.7 | 4  | 5  |
| HSPA1A    | 1:10 | 48.8  | 97.7   | 50000   | 200000   | 2.7 | 6  | 4  |
| TNFRSF11B | 1:10 | 0.1   | 0.2    | 6250    | 25000    | 4.5 | 7  | 3  |
| SCG3      | 1:10 | 12.2  | 24.4   | 25000   | 200000   | 3.0 | 7  | 4  |
| TPP1      | 1:10 | 1.5   | 3.1    | 12500   | 100000   | 3.6 | 6  | 3  |
| MEGF10    | 1:10 | 87.9  | 175.8  | 90000   | 360000   | 2.7 | 5  | 5  |
| CDON      | 1:10 | 12.2  | 24.4   | 50000   | 200000   | 3.3 | 6  | 4  |
| MPIG6B    | 1:10 | 0.8   | 1.5    | 1563    | 3125     | 3.0 | 12 | 14 |
| LGALS4    | 1:10 | 1.5   | 6.1    | 6250    | 25000    | 3.0 | 5  | 4  |
| SKAP2     | 1:10 | 24.4  | 48.8   | 50000   | 200000   | 3.0 | 9  | 11 |
| PDGFB     | 1:10 | 6.1   | 6.1    | 6250    | 12500    | 3.0 | 10 | 11 |
| SCGB3A2   | 1:10 | 3.1   | 12.2   | 50000   | 200000   | 3.6 | 8  | 11 |
| FSTL3     | 1:10 | 12.2  | 12.2   | 6250    | 25000    | 2.7 | 6  | 5  |
| ANGPTL2   | 1:10 | 781.3 | 1562.5 | 6400000 | 12800000 | 3.6 | 9  | 8  |
| REG4      | 1:10 | 48.8  | 97.7   | 200000  | 400000   | 3.3 | 7  | 9  |

|              |      |        |        |        |        |     |    |     |
|--------------|------|--------|--------|--------|--------|-----|----|-----|
| CRHBP        | 1:10 | 24.4   | 97.7   | 100000 | 800000 | 3.0 | 7  | 5   |
| OMD          | 1:10 | 195.3  | 390.6  | 50000  | 200000 | 2.1 | 7  | 3   |
| NME3         | 1:10 | 6.1    | 12.2   | 6250   | 25000  | 2.7 | 8  | 5   |
| FIS1         | 1:10 | 195.3  | 781.3  | 800000 | 800000 | 3.0 | 9  | 12  |
| FST          | 1:10 | 12.2   | 24.4   | 25000  | 50000  | 3.0 | 5  | 6   |
| B4GALT1      | 1:10 | 24.4   | 48.8   | 100000 | 200000 | 3.3 | 10 | 6   |
| CKMT1A_CKMT1 | 1:10 | 48.8   | 97.7   | 400000 | 800000 | 3.6 | 7  | 15  |
| ADGRE2       | 1:10 | 0.8    | 1.5    | 6250   | 25000  | 3.6 | 7  | 5   |
| MEPE         | 1:10 | 24.4   | 48.8   | 12500  | 25000  | 2.4 | 8  | 3   |
| CRELD2       | 1:10 | 3.1    | 6.1    | 12500  | 200000 | 3.3 | 8  | 3   |
| CTRC         | 1:10 | 3.1    | 6.1    | 12500  | 50000  | 3.3 | 7  | 9   |
| FABP1        | 1:10 | 3.1    | 6.1    | 100000 | 200000 | 4.2 | 8  | 5   |
| LAMA4        | 1:10 | 12.2   | 24.4   | 100000 | 200000 | 3.6 | 7  | 5   |
| TNFRSF14     | 1:10 | 0.8    | 1.5    | 6250   | 25000  | 3.6 | 8  | 4   |
| GAL          | 1:10 | 24.4   | 48.8   | 100000 | 200000 | 3.3 | 8  | 7   |
| WFIKKN2      | 1:10 | 3.1    | 6.1    | 6250   | 25000  | 3.0 | 5  | 4   |
| OSCAR        | 1:10 | 3.1    | 6.1    | 6250   | 200000 | 3.0 | 7  | 5   |
| CCL24        | 1:10 | 0.8    | 0.8    | 3125   | 6250   | 3.6 | 8  | 10  |
| CD40         | 1:10 | 0.1    | 0.2    | 3125   | 12500  | 4.2 | 9  | 8   |
| PNLIPRP2     | 1:10 | 3.1    | 6.1    | 25000  | 200000 | 3.6 | 6  | 4   |
| CHRDL1       | 1:10 | 390.6  | 390.6  | 100000 | 200000 | 2.4 | 8  | 6   |
| DAND5        | 1:1  |        |        |        |        |     | 10 |     |
| FOLH1        | 1:1  | 6250.0 | 6250.0 | 400000 | 800000 | 1.8 | 12 | 14  |
| RAP1A        | 1:1  |        |        |        |        |     | 11 | 16  |
| GLI2         | 1:1  | 195.3  | 195.3  | 12500  | 25000  | 1.8 |    |     |
| FGF12        | 1:1  | 24.4   | 48.8   | 3125   | 25000  | 1.8 |    |     |
| TLR4         | 1:1  |        |        |        |        |     |    |     |
| MKI67        | 1:1  | 48.8   | 97.7   | 12500  | 100000 | 2.1 | 13 | 24  |
| CCNE1        | 1:1  | 390.6  | 781.3  | 50000  | 400000 | 1.8 |    |     |
| UBE2Z        | 1:1  | 390.6  | 781.3  | 100000 | 800000 | 2.1 | 13 | 21  |
| PRR5         | 1:1  | 3125.0 | 6250.0 | 400000 | 800000 | 1.8 | 13 | 0.3 |
| CEBPA        | 1:1  |        |        |        |        |     |    |     |
| KDM3A        | 1:1  | 1562.5 | 3125.0 | 200000 | 800000 | 1.8 |    |     |
| FGF20        | 1:1  | 3125.0 | 6250.0 | 800000 | 800000 | 2.1 | 6  | 18  |
| PGR          | 1:1  | 781.3  | 781.3  | 200000 | 800000 | 2.4 | 10 | 9   |
| IL20RB       | 1:1  | 390.6  | 781.3  | 200000 | 800000 | 2.4 |    |     |
| NPHS2        | 1:1  | 390.6  | 781.3  | 50000  | 800000 | 1.8 | 6  | 20  |
| NME1         | 1:1  | 3125.0 | 3125.0 | 200000 | 400000 | 1.8 |    |     |
| LRIG3        | 1:1  |        |        |        |        |     |    |     |
| GAD2         | 1:1  | 1562.5 | 6250.0 | 400000 | 800000 | 1.8 |    |     |
| CD3G         | 1:1  | 390.6  | 781.3  | 50000  | 400000 | 1.8 | 10 | 13  |
| POLR2A       | 1:1  |        |        |        |        |     | 6  |     |
| EP300        | 1:1  | 390.6  | 390.6  | 12500  | 25000  | 1.5 | 3  |     |
| IL21R        | 1:1  | 781.3  | 781.3  | 50000  | 400000 | 1.8 |    |     |
| PTPN9        | 1:1  | 1562.5 | 6250.0 | 400000 | 800000 | 1.8 |    |     |
| ST8SIA1      | 1:1  | 390.6  | 1562.5 | 200000 | 800000 | 2.1 | 14 | 20  |
| HDAC8        | 1:1  |        |        |        |        |     |    |     |
| FGF6         | 1:1  | 1562.5 | 3125.0 | 400000 | 800000 | 2.1 | 13 | 16  |
| RELB         | 1:1  |        |        |        |        |     | 12 | 7   |
| TNFSF9       | 1:1  |        |        |        |        |     | 12 | 17  |
| ESR1         | 1:1  |        |        |        |        |     | 8  | 29  |
| FOXJ3        | 1:1  | 195.3  | 390.6  | 25000  | 800000 | 1.8 | 12 | 12  |



|         |     |        |        |        |         |     |    |    |
|---------|-----|--------|--------|--------|---------|-----|----|----|
| YY1     | 1:1 |        |        |        |         |     |    |    |
| RICTOR  | 1:1 |        |        |        |         |     | 4  | 17 |
| STX5    | 1:1 |        |        |        |         |     | 7  | 10 |
| UNC5D   | 1:1 | 48.8   | 97.7   | 12500  | 100000  | 2.1 | 15 | 14 |
| DDX4    | 1:1 | 195.3  | 195.3  | 12500  | 100000  | 1.8 |    |    |
| PALLD   | 1:1 | 781.3  | 1562.5 | 100000 | 400000  | 1.8 | 10 | 27 |
| HIF1A   | 1:1 | 12.2   | 24.4   | 1563   | 12500   | 1.8 | 8  | 20 |
| RPA2    | 1:1 |        |        |        |         |     |    |    |
| IL12RB2 | 1:1 | 3125.0 | 3125.0 | 400000 | 800000  | 2.1 | 2  | 28 |
| PTP4A3  | 1:1 |        |        |        |         |     | 8  | 10 |
| EDNRB   | 1:1 | 48.8   | 97.7   | 6250   | 25000   | 1.8 | 8  | 20 |
| SSBP1   | 1:1 |        |        |        |         |     | 12 | 16 |
| WASL    | 1:1 |        |        |        |         |     |    |    |
| KLRF1   | 1:1 | 6.1    | 12.2   | 3125   | 25000   | 2.4 | 9  | 13 |
| BABAM1  | 1:1 |        |        |        |         |     | 4  |    |
| SPRED2  | 1:1 |        |        |        |         |     | 14 | 21 |
| PIKFYVE | 1:1 |        |        |        |         |     | 8  | 12 |
| TPSG1   | 1:1 | 390.6  | 390.6  | 25000  | 800000  | 1.8 | 19 |    |
| SIRT1   | 1:1 | 195.3  | 390.6  | 25000  | 200000  | 1.8 | 9  | 19 |
| TP53BP1 | 1:1 | 390.6  | 1562.5 | 400000 | 800000  | 2.4 | 11 | 18 |
| SMPD3   | 1:1 | 3125.0 | 6250.0 | 400000 | 800000  | 1.8 | 10 |    |
| POF1B   | 1:1 | 390.6  | 390.6  | 100000 | 200000  | 2.4 | 17 | 24 |
| TRAF3   | 1:1 |        |        |        |         |     | 10 | 13 |
| IL31    | 1:1 | 781.3  | 1562.5 | 200000 | 800000  | 2.1 | 8  | 9  |
| NEDD9   | 1:1 | 195.3  | 195.3  | 12500  | 50000   | 1.8 | 11 |    |
| AKR7L   | 1:1 |        |        |        |         |     | 15 | 23 |
| BAG4    | 1:1 |        |        |        |         |     | 13 | 14 |
| TGFBR1  | 1:1 | 390.6  | 390.6  | 50000  | 200000  | 2.1 | 1  |    |
| MCEMP1  | 1:1 | 24.4   | 48.8   | 6250   | 25000   | 2.1 | 21 | 28 |
| IGFL4   | 1:1 | 24.4   | 48.8   | 12500  | 50000   | 2.4 | 13 | 25 |
| MRPS16  | 1:1 | 3125.0 | 6250.0 | 400000 | 800000  | 1.8 |    |    |
| RNF168  | 1:1 |        |        |        |         |     |    |    |
| HS6ST2  | 1:1 |        |        |        |         |     | 9  | 24 |
| CEMIP2  | 1:1 | 48.8   | 195.3  | 25000  | 200000  | 2.1 | 12 | 14 |
| BCL2L15 | 1:1 | 48.8   | 97.7   | 12500  | 50000   | 2.1 | 13 | 15 |
| ALPI    | 1:1 | 390.6  | 781.3  | 25000  | 100000  | 1.5 | 10 | 36 |
| REPS1   | 1:1 |        |        |        |         |     | 14 | 16 |
| TSC1    | 1:1 | 3125.0 | 6250.0 | 400000 | 800000  | 1.8 | 14 | 21 |
| XIAP    | 1:1 | 3125.0 | 3125.0 | 400000 | 800000  | 2.1 | 8  | 15 |
| CPOX    | 1:1 | 6250.0 | 6250.0 | 800000 | 800000  | 2.1 | 9  | 17 |
| DDX39A  | 1:1 | 97.7   | 390.6  | 25000  | 200000  | 1.8 | 5  | 16 |
| DENR    | 1:1 | 390.6  | 781.3  | 25000  | 100000  | 1.5 | 11 | 21 |
| CSNK1D  | 1:1 |        |        |        |         |     | 12 | 36 |
| THSD1   | 1:1 | 1562.5 | 3125.0 | 200000 | 800000  | 1.8 | 7  | 35 |
| IL31RA  | 1:1 | 1562.5 | 3125.0 | 200000 | 800000  | 1.8 | 11 | 16 |
| RBPMS   | 1:1 |        |        |        |         |     | 10 | 16 |
| DAPK2   | 1:1 | 1562.5 | 1562.5 | 100000 | 800000  | 1.8 | 18 | 22 |
| SUMF1   | 1:1 | 3125.0 | 6250.0 | 400000 | 800000  | 1.8 | 8  | 17 |
| CA8     | 1:1 | 3125.0 | 6250.0 | 800000 | 6400000 | 2.1 |    |    |
| EVI5    | 1:1 | 195.3  | 390.6  | 100000 | 200000  | 2.4 | 9  | 15 |
| ANKMY2  | 1:1 | 781.3  | 1562.5 | 100000 | 400000  | 1.8 | 11 | 23 |
| TERF1   | 1:1 | 781.3  | 1562.5 | 50000  | 400000  | 1.5 | 12 |    |

|          |     |         |         |        |        |     |    |    |
|----------|-----|---------|---------|--------|--------|-----|----|----|
| PRSS22   | 1:1 |         |         |        |        |     | 12 | 12 |
| ADAMTS4  | 1:1 | 781.3   | 781.3   | 100000 | 800000 | 2.1 | 13 | 25 |
| TYRP1    | 1:1 | 6250.0  | 12500.0 | 800000 | 800000 | 1.8 | 10 | 16 |
| SHH      | 1:1 |         |         |        |        |     |    |    |
| C1QL2    | 1:1 | 1562.5  | 1562.5  | 100000 | 400000 | 1.8 | 10 | 16 |
| RNF31    | 1:1 |         |         |        |        |     | 11 | 15 |
| PLCB1    | 1:1 | 6250.0  | 6250.0  | 400000 | 800000 | 1.8 |    |    |
| PSMG4    | 1:1 |         |         |        |        |     | 12 | 12 |
| ADAM12   | 1:1 | 390.6   | 781.3   | 50000  | 800000 | 1.8 | 14 | 14 |
| IL36A    | 1:1 | 195.3   | 195.3   | 25000  | 200000 | 2.1 | 21 |    |
| ZNF174   | 1:1 | 390.6   | 390.6   | 25000  | 200000 | 1.8 | 9  | 18 |
| NAGA     | 1:1 | 3125.0  | 6250.0  | 400000 | 800000 | 1.8 | 13 | 17 |
| TSPYL1   | 1:1 | 390.6   | 1562.5  | 100000 | 800000 | 1.8 | 9  | 17 |
| PER3     | 1:1 |         |         |        |        |     | 16 | 37 |
| CD36     | 1:1 | 781.3   | 781.3   | 50000  | 400000 | 1.8 | 9  | 14 |
| ACRV1    | 1:1 | 12.2    | 48.8    | 6250   | 50000  | 2.1 | 9  | 24 |
| SLITRK1  | 1:1 | 195.3   | 195.3   | 25000  | 200000 | 2.1 | 11 | 19 |
| LMOD1    | 1:1 |         |         |        |        |     | 17 | 23 |
| IDO1     | 1:1 | 195.3   | 390.6   | 100000 | 400000 | 2.4 | 13 | 17 |
| SCRIB    | 1:1 |         |         |        |        |     | 16 | 26 |
| NDUFA5   | 1:1 | 781.3   | 1562.5  | 200000 | 800000 | 2.1 | 16 | 17 |
| NECTIN1  | 1:1 |         |         |        |        |     | 9  | 13 |
| FGF3     | 1:1 | 1562.5  | 1562.5  | 100000 | 800000 | 1.8 |    |    |
| GIPR     | 1:1 | 24.4    | 48.8    | 12500  | 50000  | 2.4 |    |    |
| BLNK     | 1:1 | 12500.0 | 12500.0 | 800000 | 800000 | 1.8 | 16 | 18 |
| NPHS1    | 1:1 | 781.3   | 1562.5  | 100000 | 400000 | 1.8 | 12 | 17 |
| ERMAP    | 1:1 | 12.2    | 24.4    | 1563   | 6250   | 1.8 | 13 | 15 |
| MTDH     | 1:1 | 781.3   | 781.3   | 50000  | 100000 | 1.8 |    |    |
| ITGAL    | 1:1 |         |         |        |        |     | 13 | 30 |
| STAT2    | 1:1 | 781.3   | 1562.5  | 100000 | 800000 | 1.8 | 11 | 24 |
| FGF16    | 1:1 | 6250.0  | 6250.0  | 400000 | 800000 | 1.8 | 17 | 14 |
| DEFB103A | 1:1 |         |         |        |        |     | 6  | 26 |
| GIT1     | 1:1 |         |         |        |        |     | 15 | 17 |
| TLR1     | 1:1 | 12.2    | 24.4    | 12500  | 100000 | 2.7 | 14 | 17 |
| SEMA6C   | 1:1 | 781.3   | 1562.5  | 200000 | 800000 | 2.1 | 10 | 14 |
| CASP9    | 1:1 |         |         |        |        |     |    |    |
| S100A13  | 1:1 | 3.1     | 12.2    | 12500  | 400000 | 3.0 | 10 | 31 |
| ADAMTS1  | 1:1 | 390.6   | 781.3   | 50000  | 100000 | 1.8 | 14 | 13 |
| DGKA     | 1:1 | 6250.0  | 12500.0 | 800000 | 800000 | 1.8 | 8  | 18 |
| CSF3R    | 1:1 | 97.7    | 195.3   | 12500  | 100000 | 1.8 | 10 | 11 |
| PPM1B    | 1:1 | 1562.5  | 3125.0  | 200000 | 800000 | 1.8 | 9  | 17 |
| PDZK1    | 1:1 | 3125.0  | 6250.0  | 400000 | 800000 | 1.8 | 15 | 18 |
| NUMB     | 1:1 | 390.6   | 1562.5  | 100000 | 800000 | 1.8 | 8  | 30 |
| RALB     | 1:1 |         |         |        |        |     | 21 |    |
| INSR     | 1:1 | 1562.5  | 1562.5  | 50000  | 400000 | 1.5 | 6  | 6  |
| NXPH3    | 1:1 | 390.6   | 390.6   | 25000  | 200000 | 1.8 | 9  | 12 |
| PPL      | 1:1 | 48.8    | 97.7    | 6250   | 50000  | 1.8 | 9  | 14 |
| PTGES2   | 1:1 |         |         |        |        |     | 17 | 27 |
| STX7     | 1:1 |         |         |        |        |     | 10 | 19 |
| TOP2B    | 1:1 | 781.3   | 1562.5  | 50000  | 400000 | 1.5 | 11 | 29 |
| EIF4E    | 1:1 | 195.3   | 195.3   | 25000  | 100000 | 2.1 | 11 | 37 |
| CD226    | 1:1 |         |         |        |        |     | 15 | 21 |

|          |      |        |         |        |         |     |    |    |
|----------|------|--------|---------|--------|---------|-----|----|----|
| VAMP8    | 1:1  | 1562.5 | 3125.0  | 400000 | 3200000 | 2.1 | 12 | 30 |
| VEGFB    | 1:1  |        |         |        |         |     | 9  | 12 |
| CSF2RB   | 1:1  | 97.7   | 97.7    | 12500  | 100000  | 2.1 | 9  | 22 |
| CLEC12A  | 1:1  |        |         |        |         |     | 8  | 9  |
| IL36G    | 1:1  |        |         |        |         |     | 16 | 16 |
| DBN1     | 1:1  | 24.4   | 48.8    | 3125   | 800000  | 1.8 | 9  | 17 |
| ZBP1     | 1:1  | 6250.0 | 12500.0 | 800000 | 800000  | 1.8 | 9  | 10 |
| CD7      | 1:1  | 781.3  | 781.3   | 200000 | 800000  | 2.4 | 15 | 11 |
| BNIP3L   | 1:1  | 195.3  | 390.6   | 12500  | 100000  | 1.5 | 15 | 18 |
| ACP1     | 1:1  | 6250.0 | 6250.0  | 400000 | 800000  | 1.8 |    |    |
| NEDD4L   | 1:1  |        |         |        |         |     | 8  | 21 |
| NFAT5    | 1:1  |        |         |        |         |     | 12 | 18 |
| LATS1    | 1:1  |        |         |        |         |     | 14 | 38 |
| AFAP1    | 1:10 |        |         |        |         |     | 6  | 23 |
| ITGA2    | 1:10 |        |         |        |         |     | 8  | 14 |
| APPL2    | 1:10 | 195.3  | 390.6   | 50000  | 800000  | 2.1 |    |    |
| TNFRSF17 | 1:10 |        |         |        |         |     | 5  | 12 |
| NHLRC3   | 1:10 |        |         |        |         |     | 5  | 7  |
| ADGRD1   | 1:10 | 48.8   | 97.7    | 12500  | 50000   | 2.1 | 5  | 10 |
| BMPER    | 1:10 | 24.4   | 48.8    | 25000  | 100000  | 2.7 | 5  | 11 |
| COL5A1   | 1:10 | 12.2   | 12.2    | 6250   | 50000   | 2.7 | 6  | 11 |
| JAM3     | 1:10 | 48.8   | 97.7    | 12500  | 100000  | 2.1 | 14 | 33 |
| ACHE     | 1:10 | 24.4   | 48.8    | 12500  | 100000  | 2.4 | 6  | 16 |
| PAXX     | 1:10 | 97.7   | 195.3   | 25000  | 100000  | 2.1 | 5  | 9  |
| PDE5A    | 1:10 | 1562.5 | 3125.0  | 200000 | 800000  | 1.8 | 5  | 27 |
| MXRA8    | 1:10 | 195.3  | 390.6   | 25000  | 200000  | 1.8 | 5  | 14 |
| DIPK2B   | 1:10 |        |         |        |         |     | 6  | 10 |
| CST1     | 1:10 | 390.6  | 781.3   | 50000  | 400000  | 1.8 | 6  | 32 |
| ANXA1    | 1:10 |        |         |        |         |     | 7  | 16 |
| DTD1     | 1:10 | 781.3  | 781.3   | 50000  | 800000  | 1.8 |    |    |
| HEG1     | 1:10 | 390.6  | 781.3   | 50000  | 400000  | 1.8 | 5  | 9  |
| ERP29    | 1:10 | 97.7   | 97.7    | 6250   | 12500   | 1.8 |    |    |
| SCGB3A1  | 1:10 |        |         |        |         |     | 6  | 13 |
| TBCA     | 1:10 | 24.4   | 48.8    | 6250   | 50000   | 2.1 | 5  | 27 |
| CD300A   | 1:10 | 48.8   | 97.7    | 6250   | 50000   | 1.8 | 5  | 9  |
| HMCN2    | 1:10 | 390.6  | 781.3   | 100000 | 400000  | 2.1 | 5  | 21 |
| GLA      | 1:10 |        |         |        |         |     | 5  | 11 |
| LEG1     | 1:10 | 12.2   | 48.8    | 6250   | 25000   | 2.1 | 5  | 18 |
| PRR4     | 1:10 |        |         |        |         |     | 7  | 18 |
| PCBD1    | 1:10 |        |         |        |         |     | 5  | 12 |
| CPA4     | 1:10 |        |         |        |         |     | 6  | 13 |
| YWHAQ    | 1:10 | 390.6  | 390.6   | 25000  | 200000  | 1.8 | 6  | 29 |
| SERPINI1 | 1:10 | 195.3  | 195.3   | 6250   | 50000   | 1.5 | 8  | 12 |
| UROD     | 1:10 | 390.6  | 390.6   | 25000  | 200000  | 1.8 | 6  | 16 |
| DDI2     | 1:10 | 195.3  | 390.6   | 50000  | 100000  | 2.1 | 6  | 17 |
| CELSR2   | 1:10 |        |         |        |         |     | 5  | 8  |
| GP5      | 1:10 | 390.6  | 781.3   | 50000  | 200000  | 1.8 | 5  | 16 |
| GAPDH    | 1:10 |        |         |        |         |     | 6  | 21 |
| SEMA3G   | 1:10 |        |         |        |         |     | 6  | 13 |
| ADH1B    | 1:10 | 3125.0 | 6250.0  | 400000 | 800000  | 1.8 | 9  | 19 |
| MFAP4    | 1:10 | 390.6  | 781.3   | 50000  | 200000  | 1.8 | 5  | 6  |
| GNPDA2   | 1:10 | 390.6  | 390.6   | 12500  | 50000   | 1.5 | 6  | 15 |

|           |      |        |        |        |         |     |    |    |
|-----------|------|--------|--------|--------|---------|-----|----|----|
| PSTPIP2   | 1:10 | 1562.5 | 3125.0 | 200000 | 800000  | 1.8 | 10 | 37 |
| MENT      | 1:10 |        |        |        |         |     | 5  | 7  |
| DNAJB6    | 1:10 | 781.3  | 3125.0 | 200000 | 800000  | 1.8 | 6  | 27 |
| RLN2      | 1:10 | 781.3  | 3125.0 | 800000 | 800000  | 2.4 | 20 | 24 |
| BMP10     | 1:10 | 781.3  | 781.3  | 50000  | 100000  | 1.8 | 7  | 11 |
| TPD52L2   | 1:10 | 781.3  | 781.3  | 50000  | 800000  | 1.8 | 6  | 37 |
| CRELD1    | 1:10 | 195.3  | 195.3  | 25000  | 200000  | 2.1 | 5  | 11 |
| AKAP12    | 1:10 | 781.3  | 1562.5 | 100000 | 1600000 | 1.8 | 8  | 10 |
| AMOT      | 1:10 | 12.2   | 24.4   | 3125   | 12500   | 2.1 | 7  | 20 |
| GHR       | 1:10 |        |        |        |         |     | 5  | 10 |
| C1QTNF5   | 1:10 | 1562.5 | 3125.0 | 200000 | 1600000 | 1.8 | 5  | 9  |
| PDIA3     | 1:10 |        |        |        |         |     | 11 | 18 |
| C1QTNF9   | 1:10 | 195.3  | 195.3  | 12500  | 400000  | 1.8 | 4  | 18 |
| GCHFR     | 1:10 |        |        |        |         |     | 5  | 8  |
| RABEP1    | 1:10 | 48.8   | 195.3  | 25000  | 100000  | 2.1 | 7  | 14 |
| SLC9A3R1  | 1:10 |        |        |        |         |     | 14 | 33 |
| SFRP4     | 1:10 |        |        |        |         |     | 5  | 10 |
| SDK2      | 1:10 | 195.3  | 390.6  | 25000  | 100000  | 1.8 | 10 | 15 |
| CACYBP    | 1:10 | 390.6  | 781.3  | 50000  | 200000  | 1.8 | 6  | 35 |
| CTSE      | 1:10 | 97.7   | 97.7   | 50000  | 200000  | 2.7 | 6  | 13 |
| SUSD5     | 1:10 | 195.3  | 390.6  | 25000  | 100000  | 1.8 | 4  | 16 |
| SPINK2    | 1:10 | 48.8   | 48.8   | 6250   | 25000   | 2.1 | 5  | 10 |
| PINLYP    | 1:10 | 390.6  | 781.3  | 50000  | 200000  | 1.8 | 11 | 16 |
| FUOM      | 1:10 | 48.8   | 195.3  | 12500  | 100000  | 1.8 | 5  | 22 |
| KLK7      | 1:10 |        |        |        |         |     | 6  | 14 |
| INHBB     | 1:10 | 390.6  | 390.6  | 25000  | 100000  | 1.8 | 7  | 18 |
| DNAJB2    | 1:10 | 195.3  | 390.6  | 25000  | 100000  | 1.8 | 6  | 11 |
| GLRX5     | 1:10 | 48.8   | 97.7   | 6250   | 50000   | 1.8 |    |    |
| FGFR4     | 1:10 | 390.6  | 781.3  | 50000  | 100000  | 1.8 | 5  | 13 |
| TP53I3    | 1:10 | 6.1    | 24.4   | 6250   | 50000   | 2.4 | 5  | 10 |
| MOCS2     | 1:10 | 1562.5 | 3125.0 | 200000 | 800000  | 1.8 | 7  | 11 |
| GIMAP7    | 1:10 | 12.2   | 48.8   | 12500  | 100000  | 2.4 | 7  | 11 |
| LZTFL1    | 1:10 | 24.4   | 97.7   | 50000  | 200000  | 2.7 | 9  | 24 |
| VTI1A     | 1:10 | 195.3  | 195.3  | 12500  | 25000   | 1.8 | 9  | 13 |
| OLFM4     | 1:10 | 781.3  | 1562.5 | 400000 | 800000  | 2.4 | 6  | 34 |
| SYAP1     | 1:10 |        |        |        |         |     | 9  | 24 |
| PENK      | 1:10 | 3125.0 | 3125.0 | 200000 | 400000  | 1.8 | 6  | 8  |
| ARHGAP45  | 1:10 | 1562.5 | 1562.5 | 400000 | 800000  | 2.4 | 9  | 16 |
| CD72      | 1:10 | 97.7   | 195.3  | 12500  | 100000  | 1.8 | 6  | 14 |
| RIDA      | 1:10 | 48.8   | 97.7   | 3125   | 12500   | 1.5 | 5  | 10 |
| DAAM1     | 1:10 | 6250.0 | 6250.0 | 400000 | 800000  | 1.8 | 9  | 27 |
| NAGPA     | 1:10 | 12.2   | 48.8   | 6250   | 50000   | 2.1 | 5  | 9  |
| PHYKPL    | 1:10 | 3125.0 | 3125.0 | 400000 | 800000  | 2.1 | 8  | 14 |
| SNX15     | 1:10 | 195.3  | 195.3  | 12500  | 100000  | 1.8 | 11 | 16 |
| MYOM3     | 1:10 | 12.2   | 24.4   | 6250   | 50000   | 2.4 | 5  | 36 |
| SNCA      | 1:10 |        |        |        |         |     |    |    |
| ACYP1     | 1:10 | 12.2   | 48.8   | 3125   | 12500   | 1.8 | 5  | 15 |
| UBXN1     | 1:10 |        |        |        |         |     | 10 | 21 |
| TNFAIP8L2 | 1:10 |        |        |        |         |     | 8  | 22 |
| DCTD      | 1:10 | 195.3  | 390.6  | 25000  | 100000  | 1.8 | 6  | 24 |
| MARS1     | 1:10 | 1562.5 | 3125.0 | 400000 | 800000  | 2.1 | 6  | 16 |
| CHAD      | 1:10 | 195.3  | 390.6  | 25000  | 100000  | 1.8 | 5  | 18 |

|        |        |        |         |        |        |     |    |    |
|--------|--------|--------|---------|--------|--------|-----|----|----|
| GMPR2  | 1:10   | 97.7   | 195.3   | 25000  | 100000 | 2.1 | 6  | 15 |
| ADD1   | 1:10   |        |         |        |        |     | 10 | 21 |
| EPHA4  | 1:10   |        |         |        |        |     | 6  | 9  |
| PRKG1  | 1:10   |        |         |        |        |     | 5  | 31 |
| SPART  | 1:10   | 97.7   | 390.6   | 50000  | 400000 | 2.1 | 6  | 16 |
| PTRHD1 | 1:10   | 390.6  | 390.6   | 50000  | 800000 | 2.1 | 7  | 26 |
| ST13   | 1:10   | 390.6  | 390.6   | 50000  | 800000 | 2.1 | 5  | 9  |
| PRDX2  | 1:1000 |        |         |        |        |     | 8  | 12 |
| CSH1   | 1:1000 | 97.7   | 97.7    | 12500  | 50000  | 2.1 |    |    |
| MDH1   | 1:1000 | 1562.5 | 6250.0  | 400000 | 800000 | 1.8 | 4  | 8  |
| TXN    | 1:1000 | 48.8   | 97.7    | 6250   | 12500  | 1.8 | 24 | 23 |
| NRGN   | 1:1000 | 48.8   | 48.8    | 12500  | 800000 | 2.4 | 7  | 28 |
| FGL1   | 1:1000 | 390.6  | 390.6   | 100000 | 200000 | 2.4 | 4  | 27 |
| APOF   | 1:1000 |        |         |        |        |     | 6  | 20 |
| CSF1R  | 1:1000 | 97.7   | 195.3   | 12500  | 50000  | 1.8 | 5  | 9  |
| GSR    | 1:1000 | 195.3  | 390.6   | 25000  | 100000 | 1.8 | 5  | 6  |
| PGA4   | 1:1000 | 12.2   | 24.4    | 25000  | 100000 | 3.0 | 4  | 9  |
| C9     | 1:1000 |        |         |        |        |     | 19 | 28 |
| CR1    | 1:1000 | 6.1    | 6.1     | 6250   | 50000  | 3.0 | 6  | 9  |
| ACE    | 1:1000 | 390.6  | 1562.5  | 200000 | 800000 | 2.1 | 7  | 9  |
| PI16   | 1:1000 |        |         |        |        |     | 6  | 6  |
| MRC1   | 1:1000 | 24.4   | 48.8    | 12500  | 200000 | 2.4 | 5  | 9  |
| PNLIP  | 1:1000 | 6.1    | 12.2    | 12500  | 50000  | 3.0 | 5  | 13 |
| VASP   | 1:1000 | 6250.0 | 12500.0 | 800000 | 800000 | 1.8 | 9  | 36 |
| LCAT   | 1:1000 | 390.6  | 781.3   | 50000  | 400000 | 1.8 | 5  | 9  |
| TGOLN2 | 1:1000 | 97.7   | 195.3   | 12500  | 800000 | 1.8 | 7  | 10 |
| FCN1   | 1:1000 |        |         |        |        |     | 11 | 22 |
| RNASE6 | 1:1000 | 6.1    | 24.4    | 3125   | 12500  | 2.1 | 6  | 7  |
| PEPD   | 1:1000 | 195.3  | 390.6   | 25000  | 200000 | 1.8 | 6  | 9  |
| NEXN   | 1:1000 | 48.8   | 97.7    | 25000  | 200000 | 2.4 |    |    |
| TCN1   | 1:1000 | 12.2   | 24.4    | 6250   | 50000  | 2.4 | 5  | 10 |
| APOA2  | 1:1000 |        |         |        |        |     |    |    |
| SHBG   | 1:1000 | 1562.5 | 3125.0  | 400000 | 800000 | 2.1 | 3  | 10 |
| F10    | 1:1000 | 97.7   | 195.3   | 12500  | 50000  | 1.8 | 8  | 9  |
| ASGR2  | 1:1000 | 195.3  | 390.6   | 25000  | 200000 | 1.8 | 8  | 14 |
| SOD3   | 1:1000 | 3.1    | 12.2    | 1563   | 12500  | 2.1 | 4  | 11 |
| TREML1 | 1:1000 | 97.7   | 390.6   | 25000  | 200000 | 1.8 | 8  | 29 |
| DBH    | 1:1000 | 97.7   | 195.3   | 100000 | 400000 | 2.7 | 4  | 32 |
| PON1   | 1:1000 |        |         |        |        |     | 7  | 11 |
| ABO    | 1:1000 | 12.2   | 48.8    | 50000  | 200000 | 3.0 | 8  | 9  |
| VNN1   | 1:1000 | 24.4   | 48.8    | 6250   | 50000  | 2.1 | 4  | 20 |
| HGFAC  | 1:1000 | 48.8   | 195.3   | 12500  | 50000  | 1.8 | 4  | 7  |
| BCHE   | 1:1000 |        |         |        |        |     | 4  | 12 |
| CFHR5  | 1:1000 |        |         |        |        |     | 6  | 15 |
| CRISP3 | 1:1000 | 390.6  | 390.6   | 25000  | 50000  | 1.8 | 3  | 7  |
| GSN    | 1:1000 | 1562.5 | 3125.0  | 200000 | 800000 | 1.8 | 4  | 8  |
| CGB3   | 1:1000 |        |         |        |        |     | 13 |    |
| MST1   | 1:1000 | 97.7   | 195.3   | 25000  | 200000 | 2.1 | 4  | 14 |
| CAT    | 1:1000 |        |         |        |        |     | 7  | 11 |
| RNASE4 | 1:1000 | 781.3  | 781.3   | 50000  | 200000 | 1.8 | 6  | 9  |
| RNASE1 | 1:1000 |        |         |        |        |     | 10 | 11 |
| CTBS   | 1:1000 | 195.3  | 195.3   | 12500  | 50000  | 1.8 | 4  | 5  |

|          |          |        |        |        |        |     |    |    |
|----------|----------|--------|--------|--------|--------|-----|----|----|
| GPI      | 1:1000   | 195.3  | 390.6  | 50000  | 200000 | 2.1 | 7  | 16 |
| APOB     | 1:1000   |        |        |        |        |     | 9  | 29 |
| AGT      | 1:1000   | 1562.5 | 3125.0 | 200000 | 800000 | 1.8 | 6  | 31 |
| AMY1A    | 1:1000   | 195.3  | 195.3  | 12500  | 50000  | 1.8 | 6  | 12 |
| AHSG     | 1:1000   |        |        |        |        |     | 5  | 14 |
| APOL1    | 1:1000   | 97.7   | 97.7   | 25000  | 100000 | 2.4 | 4  | 33 |
| C8B      | 1:100000 |        |        |        |        |     | 12 | 14 |
| CFHR2    | 1:100000 | 195.3  | 390.6  | 25000  | 100000 | 1.8 | 8  | 16 |
| SERPINA6 | 1:100000 | 390.6  | 781.3  | 200000 | 800000 | 2.4 | 5  | 8  |
| SERPINA7 | 1:100000 | 195.3  | 390.6  | 25000  | 200000 | 1.8 | 7  | 8  |
| SERPINF1 | 1:100000 | 195.3  | 390.6  | 50000  | 800000 | 2.1 | 3  | 8  |
| PGLYRP2  | 1:100000 | 1562.5 | 3125.0 | 400000 | 800000 | 2.1 | 4  | 6  |
| LGALS3BP | 1:100000 | 97.7   | 195.3  | 12500  | 50000  | 1.8 | 7  | 11 |
| CLU      | 1:100000 | 781.3  | 1562.5 | 100000 | 800000 | 1.8 | 5  | 8  |
| B2M      | 1:100000 | 48.8   | 97.7   | 6250   | 25000  | 1.8 | 6  | 5  |
| AFM      | 1:100000 | 97.7   | 195.3  | 50000  | 200000 | 2.4 | 6  | 7  |
| CFHR4    | 1:100000 | 48.8   | 97.7   | 12500  | 50000  | 2.1 | 4  | 12 |
| SAA4     | 1:100000 |        |        |        |        |     | 5  | 9  |
| IGLC2    | 1:100000 | 6.1    | 12.2   | 781    | 50000  | 1.8 | 4  | 5  |
| F12      | 1:100000 | 97.7   | 195.3  | 25000  | 200000 | 2.1 | 9  | 23 |
| MBL2     | 1:100000 | 1.5    | 12.2   | 3125   | 25000  | 2.4 | 5  | 27 |
| F2       | 1:100000 |        |        |        |        |     | 6  | 7  |
| APOE     | 1:100000 |        |        |        |        |     | 10 | 17 |
| LYVE1    | 1:100000 | 3.1    | 6.1    | 1563   | 12500  | 2.4 | 6  | 11 |
| CFD      | 1:100000 | 12.2   | 24.4   | 12500  | 50000  | 2.7 | 7  | 6  |
| PROS1    | 1:100000 | 195.3  | 390.6  | 50000  | 200000 | 2.1 | 5  | 7  |
| KLKB1    | 1:100000 | 195.3  | 390.6  | 25000  | 200000 | 1.8 | 5  | 7  |
| ECM1     | 1:100000 | 6250.0 | 6250.0 | 400000 | 800000 | 1.8 | 7  | 15 |
| ATRN     | 1:100000 | 195.3  | 390.6  | 50000  | 200000 | 2.1 | 5  | 6  |
| SERPINA5 | 1:100000 |        |        |        |        |     | 5  | 14 |
| QSOX1    | 1:100000 | 390.6  | 390.6  | 12500  | 50000  | 1.5 | 6  | 7  |
| PPBP     | 1:100000 | 24.4   | 48.8   | 12500  | 100000 | 2.4 | 5  | 28 |
| CPB2     | 1:100000 | 195.3  | 390.6  | 25000  | 200000 | 1.8 | 6  | 9  |
| PZP      | 1:100000 | 390.6  | 390.6  | 100000 | 800000 | 2.4 | 4  | 6  |
| APOA4    | 1:100000 | 781.3  | 1562.5 | 100000 | 800000 | 1.8 | 8  | 16 |
| C1S      | 1:100000 | 195.3  | 390.6  | 50000  | 200000 | 2.1 | 6  | 7  |
| PF4      | 1:100000 |        |        |        |        |     | 11 | 28 |
| CLEC3B   | 1:100000 | 97.7   | 195.3  | 25000  | 200000 | 2.1 | 5  | 6  |
| ITIH4    | 1:100000 | 390.6  | 781.3  | 50000  | 200000 | 1.8 | 4  | 14 |
| SERPIND1 | 1:100000 | 3125.0 | 3125.0 | 400000 | 800000 | 2.1 | 5  | 11 |
| APOA1    | 1:100000 |        |        |        |        |     | 8  | 14 |
| ADIPOQ   | 1:100000 | 781.3  | 781.3  | 25000  | 50000  | 1.5 | 7  | 18 |
| C7       | 1:100000 | 24.4   | 48.8   | 12500  | 100000 | 2.4 | 9  | 6  |
| LPA      | 1:100000 | 24.4   | 48.8   | 3125   | 50000  | 1.8 |    |    |
| C1R      | 1:100000 | 390.6  | 1562.5 | 100000 | 200000 | 1.8 | 5  | 6  |
| APOD     | 1:100000 | 781.3  | 1562.5 | 50000  | 200000 | 1.5 | 7  | 17 |
| SELL     | 1:100000 | 3.1    | 6.1    | 1563   | 6250   | 2.4 | 4  | 6  |
| BTD      | 1:100000 | 12.2   | 24.4   | 3125   | 25000  | 2.1 | 5  | 7  |
| C1RL     | 1:100000 | 12.2   | 24.4   | 6250   | 50000  | 2.4 | 5  | 7  |
| ORM1     | 1:100000 | 24.4   | 48.8   | 6250   | 25000  | 2.1 | 6  | 5  |
| ITIH1    | 1:100000 | 195.3  | 195.3  | 25000  | 200000 | 2.1 | 6  | 8  |
| APOC1    | 1:100000 | 195.3  | 390.6  | 100000 | 800000 | 2.4 | 9  | 16 |

|          |          |         |         |         |         |     |    |    |
|----------|----------|---------|---------|---------|---------|-----|----|----|
| CFB      | 1:100000 | 781.3   | 1562.5  | 100000  | 800000  | 1.8 | 6  | 12 |
| SERPINA1 | 1:100000 | 3125.0  | 6250.0  | 400000  | 800000  | 1.8 | 3  | 4  |
| SELENOP  | 1:100000 | 97.7    | 195.3   | 25000   | 100000  | 2.1 | 15 | 19 |
| C5       | 1:100000 | 24.4    | 48.8    | 3125    | 12500   | 1.8 | 7  | 7  |
| LRG1     | 1:100000 | 97.7    | 97.7    | 6250    | 25000   | 1.8 | 5  | 6  |
| HRG      | 1:100000 | 97.7    | 195.3   | 25000   | 200000  | 2.1 | 6  | 9  |
| PLG      | 1:100000 | 97.7    | 195.3   | 50000   | 200000  | 2.4 | 4  | 11 |
| CFP      | 1:100000 | 195.3   | 390.6   | 25000   | 200000  | 1.8 | 4  | 7  |
| TF       | 1:100000 |         |         |         |         |     | 5  | 5  |
| FN1      | 1:100000 |         |         |         |         |     | 4  | 23 |
| TTR      | 1:100000 | 195.3   | 195.3   | 12500   | 50000   | 1.8 | 5  | 5  |
| F13B     | 1:100000 | 390.6   | 781.3   | 25000   | 100000  | 1.5 | 6  | 10 |
| GC       | 1:100000 | 97.7    | 390.6   | 25000   | 200000  | 1.8 | 4  | 7  |
| SERPINF2 | 1:100000 | 390.6   | 781.3   | 100000  | 400000  | 2.1 | 4  | 6  |
| FGA      | 1:100000 | 781.3   | 1562.5  | 200000  | 800000  | 2.1 | 6  | 19 |
| SERPING1 | 1:100000 | 390.6   | 390.6   | 25000   | 200000  | 1.8 | 4  | 7  |
| SERPINC1 | 1:100000 |         |         |         |         |     | 4  | 4  |
| C3       | 1:100000 |         |         |         |         |     | 7  | 40 |
| CD5L     | 1:100000 | 24.4    | 24.4    | 12500   | 50000   | 2.7 | 4  | 13 |
| SERPINA4 | 1:100000 |         |         |         |         |     | 5  | 6  |
| APCS     | 1:100000 | 195.3   | 390.6   | 25000   | 100000  | 1.8 | 4  | 10 |
| SERPINA3 | 1:100000 |         |         |         |         |     | 3  | 6  |
| A1BG     | 1:100000 | 48.8    | 195.3   | 12500   | 200000  | 1.8 | 4  | 6  |
| CFH      | 1:100000 |         |         |         |         |     | 5  | 8  |
| F11      | 1:100000 | 12.2    | 48.8    | 12500   | 50000   | 2.4 | 6  | 9  |
| CFI      | 1:100000 | 195.3   | 390.6   | 50000   | 200000  | 2.1 | 5  | 9  |
| ODAM     | 1:1      | 195.3   | 781.3   | 100000  | 200000  | 2.1 | 8  | 14 |
| NPM1     | 1:1      | 24.4    | 48.8    | 12500   | 200000  | 2.4 | 8  | 10 |
| PRTFDC1  | 1:1      | 3125.0  | 6250.0  | 400000  | 800000  | 1.8 | 10 | 11 |
| NXPH1    | 1:1      | 48.8    | 195.3   | 100000  | 200000  | 2.7 | 8  | 13 |
| MUC13    | 1:1      | 6.1     | 12.2    | 6250    | 25000   | 2.7 | 9  | 19 |
| VSTM1    | 1:1      | 48.8    | 97.7    | 6250    | 25000   | 1.8 | 9  | 9  |
| SLC39A14 | 1:1      | 97.7    | 390.6   | 12500   | 50000   | 1.5 | 9  | 19 |
| TBC1D17  | 1:1      | 195.3   | 390.6   | 50000   | 200000  | 2.1 | 8  | 12 |
| ADGRB3   | 1:1      | 12.2    | 24.4    | 100000  | 800000  | 3.6 | 7  | 6  |
| PSME1    | 1:1      | 97.7    | 195.3   | 50000   | 200000  | 2.4 | 8  | 8  |
| FRZB     | 1:1      | 97.7    | 195.3   | 25000   | 50000   | 2.1 | 7  | 5  |
| GLB1     | 1:1      | 195.3   | 390.6   | 100000  | 800000  | 2.4 | 8  | 10 |
| GLT8D2   | 1:1      | 3125.0  | 6250.0  | 1600000 | 3200000 | 2.4 | 9  | 9  |
| ASAH2    | 1:1      | 97.7    | 195.3   | 25000   | 200000  | 2.1 | 11 | 6  |
| AGR2     | 1:1      | 1562.5  | 1562.5  | 100000  | 800000  | 1.8 | 21 | 13 |
| GFRA3    | 1:1      | 24.4    | 48.8    | 12500   | 50000   | 2.4 | 9  | 8  |
| CHMP1A   | 1:1      |         |         |         |         |     | 5  | 10 |
| TST      | 1:1      | 6250.0  | 6250.0  | 800000  | 1600000 | 2.1 | 11 | 13 |
| MAX      | 1:1      | 97.7    | 390.6   | 25000   | 100000  | 1.8 | 7  | 19 |
| GSTP1    | 1:1      | 12500.0 | 12500.0 | 400000  | 1600000 | 1.5 | 8  | 17 |
| ISLR2    | 1:1      | 24.4    | 48.8    | 25000   | 200000  | 2.7 | 6  | 15 |
| CST5     | 1:1      | 24.4    | 24.4    | 6250    | 25000   | 2.4 | 6  | 6  |
| CX3CL1   | 1:1      | 24.4    | 48.8    | 6250    | 12500   | 2.1 | 8  | 8  |
| CASP1    | 1:1      | 97.7    | 195.3   | 50000   | 100000  | 2.4 | 8  | 21 |
| NEFL     | 1:1      | 390.6   | 781.3   | 200000  | 800000  | 2.4 | 12 | 12 |
| TDRKH    | 1:1      | 6.1     | 12.2    | 6250    | 25000   | 2.7 | 6  | 13 |

|           |     |        |         |         |         |     |    |    |
|-----------|-----|--------|---------|---------|---------|-----|----|----|
| CLSTN1    | 1:1 | 390.6  | 1562.5  | 200000  | 800000  | 2.1 | 10 | 11 |
| KIRREL2   | 1:1 | 97.7   | 195.3   | 50000   | 200000  | 2.4 | 8  | 14 |
| PFDN2     | 1:1 | 97.7   | 195.3   | 100000  | 800000  | 2.7 | 7  | 23 |
| HNMT      | 1:1 | 12.2   | 48.8    | 25000   | 50000   | 2.7 | 7  | 6  |
| TMPRSS5   | 1:1 | 3.1    | 6.1     | 6250    | 50000   | 3.0 | 8  | 5  |
| TNFRSF10B | 1:1 | 0.8    | 1.5     | 3125    | 12500   | 3.3 | 10 | 7  |
| PLA2G10   | 1:1 | 1.5    | 3.1     | 3125    | 12500   | 3.0 | 9  | 6  |
| LY96      | 1:1 | 6250.0 | 12500.0 | 1600000 | 3200000 | 2.1 | 9  | 6  |
| EBAG9     | 1:1 | 97.7   | 390.6   | 50000   | 200000  | 2.1 | 8  | 6  |
| PSG1      | 1:1 | 6.1    | 12.2    | 3125    | 12500   | 2.4 | 8  | 7  |
| CSF2RA    | 1:1 | 781.3  | 1562.5  | 400000  | 800000  | 2.4 | 9  | 8  |
| ECE1      | 1:1 |        |         |         |         |     | 13 | 17 |
| WFIKKN1   | 1:1 | 12.2   | 24.4    | 50000   | 200000  | 3.3 | 10 | 5  |
| GPC5      | 1:1 | 12.2   | 48.8    | 25000   | 50000   | 2.7 | 10 | 6  |
| CRADD     | 1:1 |        |         |         |         |     | 10 | 6  |
| CCS       | 1:1 | 781.3  | 1562.5  | 400000  | 800000  | 2.4 | 9  | 10 |
| ASGR1     | 1:1 | 195.3  | 390.6   | 100000  | 800000  | 2.4 | 7  | 6  |
| CCL2      | 1:1 | 6.1    | 12.2    | 1563    | 6250    | 2.1 | 9  | 8  |
| KRT14     | 1:1 | 97.7   | 390.6   | 200000  | 800000  | 2.7 | 6  | 18 |
| RAB6B     | 1:1 | 195.3  | 781.3   | 50000   | 200000  | 1.8 | 8  | 11 |
| SIGLEC15  | 1:1 | 97.7   | 195.3   | 100000  | 200000  | 2.7 | 6  | 15 |
| METAP1    | 1:1 | 781.3  | 1562.5  | 200000  | 800000  | 2.1 | 7  | 23 |
| IL34      | 1:1 | 48.8   | 195.3   | 200000  | 800000  | 3.0 | 8  | 14 |
| IFNL1     | 1:1 | 6.1    | 12.2    | 25000   | 100000  | 3.3 | 9  | 16 |
| LYPD1     | 1:1 | 195.3  | 390.6   | 100000  | 400000  | 2.4 | 6  | 12 |
| RASA1     | 1:1 | 6250.0 | 6250.0  | 3200000 | 6400000 | 2.7 | 9  | 15 |
| ATP5PO    | 1:1 | 48.8   | 48.8    | 100000  | 800000  | 3.3 | 6  | 20 |
| IDI2      | 1:1 | 195.3  | 781.3   | 200000  | 800000  | 2.4 | 12 | 20 |
| ARID4B    | 1:1 | 12.2   | 24.4    | 12500   | 200000  | 2.7 | 6  | 15 |
| SSB       | 1:1 | 390.6  | 1562.5  | 200000  | 800000  | 2.1 | 6  | 10 |
| SLC27A4   | 1:1 | 24.4   | 24.4    | 100000  | 200000  | 3.6 | 8  | 18 |
| SIRT5     | 1:1 | 1562.5 | 1562.5  | 200000  | 400000  | 2.1 | 12 | 24 |
| KCNIP4    | 1:1 | 48.8   | 48.8    | 12500   | 200000  | 2.4 | 8  | 8  |
| SLC16A1   | 1:1 | 781.3  | 1562.5  | 400000  | 800000  | 2.4 | 13 | 9  |
| SESTD1    | 1:1 | 3125.0 | 3125.0  | 400000  | 800000  | 2.1 | 14 | 6  |
| PXN       | 1:1 |        |         |         |         |     | 7  | 14 |
| SMARCA2   | 1:1 | 97.7   | 195.3   | 50000   | 200000  | 2.4 | 7  | 12 |
| ANXA5     | 1:1 |        |         |         |         |     | 10 | 17 |
| LIF       | 1:1 | 3.1    | 6.1     | 3125    | 100000  | 2.7 | 6  | 9  |
| TDGF1     | 1:1 | 390.6  | 781.3   | 100000  | 200000  | 2.1 | 8  | 34 |
| ATF2      | 1:1 | 1406.3 | 2812.5  | 360000  | 720000  | 2.1 | 8  | 16 |
| PAK4      | 1:1 | 390.6  | 1562.5  | 200000  | 800000  | 2.1 | 12 | 15 |
| CDHR1     | 1:1 | 48.8   | 97.7    | 50000   | 200000  | 2.7 | 8  | 10 |
| MMP13     | 1:1 | 24.4   | 48.8    | 100000  | 400000  | 3.3 | 8  | 13 |
| MAPT      | 1:1 | 1562.5 | 1562.5  | 50000   | 200000  | 1.5 | 11 | 22 |
| COPE      | 1:1 | 781.3  | 1562.5  | 400000  | 800000  | 2.4 | 8  | 12 |
| FGR       | 1:1 | 390.6  | 390.6   | 100000  | 400000  | 2.4 | 8  | 19 |
| FOSB      | 1:1 | 195.3  | 390.6   | 200000  | 800000  | 2.7 | 6  | 22 |
| CLSPN     | 1:1 |        |         |         |         |     | 17 | 32 |
| FMNL1     | 1:1 | 3125.0 | 3125.0  | 200000  | 800000  | 1.8 | 11 | 19 |
| S100A16   | 1:1 | 97.7   | 390.6   | 25000   | 400000  | 1.8 | 13 | 13 |
| DCTN6     | 1:1 | 781.3  | 3125.0  | 200000  | 800000  | 1.8 | 5  | 14 |



|          |     |         |         |         |          |     |    |    |
|----------|-----|---------|---------|---------|----------|-----|----|----|
| SCARB1   | 1:1 | 1562.5  | 3125.0  | 400000  | 800000   | 2.1 | 7  | 14 |
| CALB2    | 1:1 | 195.3   | 781.3   | 200000  | 400000   | 2.4 | 9  | 19 |
| ATXN10   | 1:1 | 195.3   | 390.6   | 50000   | 200000   | 2.1 | 9  | 13 |
| MRPL46   | 1:1 |         |         |         |          |     | 11 | 21 |
| BAX      | 1:1 | 14.2    | 28.3    | 29000   | 116000   | 3.0 | 9  | 21 |
| ATP6V1F  | 1:1 |         |         |         |          |     | 7  | 16 |
| TPPP3    | 1:1 | 195.3   | 390.6   | 25000   | 100000   | 1.8 | 8  | 10 |
| KEL      | 1:1 | 1562.5  | 3125.0  | 200000  | 800000   | 1.8 | 6  | 8  |
| NDRG1    | 1:1 | 48.8    | 195.3   | 100000  | 400000   | 2.7 | 9  | 15 |
| IVD      | 1:1 | 3125.0  | 3125.0  | 400000  | 800000   | 2.1 | 10 | 12 |
| PADI4    | 1:1 |         |         |         |          |     | 9  | 14 |
| GGA1     | 1:1 |         |         |         |          |     | 11 | 11 |
| HSP90B1  | 1:1 |         |         |         |          |     | 7  | 11 |
| EPHA10   | 1:1 | 97.7    | 195.3   | 100000  | 800000   | 2.7 | 8  | 15 |
| BRK1     | 1:1 | 24.4    | 48.8    | 100000  | 200000   | 3.3 | 9  | 13 |
| PMVK     | 1:1 | 3125.0  | 3125.0  | 800000  | 6400000  | 2.4 | 17 | 21 |
| HMOX2    | 1:1 | 24.4    | 48.8    | 100000  | 200000   | 3.3 | 8  | 10 |
| KLB      | 1:1 | 1562.5  | 1562.5  | 200000  | 800000   | 2.1 | 12 | 22 |
| ILKAP    | 1:1 | 781.3   | 1562.5  | 400000  | 800000   | 2.4 | 10 | 17 |
| C2CD2L   | 1:1 | 25000.0 | 50000.0 | 6400000 | 12800000 | 2.1 | 5  |    |
| SLIT2    | 1:1 | 97.7    | 390.6   | 100000  | 200000   | 2.4 | 7  | 11 |
| KRT5     | 1:1 |         |         |         |          |     | 11 | 17 |
| GKN1     | 1:1 | 1562.5  | 3125.0  | 800000  | 3200000  | 2.4 | 6  | 26 |
| PTK7     | 1:1 | 390.6   | 390.6   | 100000  | 200000   | 2.4 | 7  | 11 |
| AMFR     | 1:1 | 97.7    | 195.3   | 100000  | 400000   | 2.7 | 7  | 21 |
| C19orf12 | 1:1 | 48.8    | 195.3   | 100000  | 200000   | 2.7 | 7  | 18 |
| NOS3     | 1:1 | 24.4    | 48.8    | 100000  | 200000   | 3.3 | 10 | 14 |
| PTEN     | 1:1 |         |         |         |          |     | 10 | 11 |
| TARBP2   | 1:1 | 97.7    | 195.3   | 100000  | 200000   | 2.7 | 7  | 19 |
| CERT1    | 1:1 |         |         |         |          |     | 10 | 13 |
| WASF3    | 1:1 |         |         |         |          |     | 6  | 9  |
| TNF      | 1:1 | 1.5     | 6.1     | 6250    | 200000   | 3.0 | 10 | 16 |
| NOS1     | 1:1 | 6.1     | 6.1     | 25000   | 50000    | 3.6 | 11 | 21 |
| DUSP3    | 1:1 |         |         |         |          |     | 9  | 10 |
| CETN2    | 1:1 | 3125.0  | 3125.0  | 200000  | 800000   | 1.8 | 11 | 20 |
| PLIN1    | 1:1 |         |         |         |          |     | 6  | 9  |
| STK24    | 1:1 | 24.4    | 195.3   | 50000   | 200000   | 2.4 | 5  | 18 |
| PBLD     | 1:1 | 390.6   | 781.3   | 400000  | 800000   | 2.7 | 7  | 12 |
| PTS      | 1:1 | 24.4    | 48.8    | 25000   | 200000   | 2.7 | 8  | 11 |
| XRCC4    | 1:1 | 390.6   | 781.3   | 100000  | 200000   | 2.1 | 7  | 11 |
| GDNF     | 1:1 | 0.4     | 0.8     | 1563    | 12500    | 3.3 | 7  | 22 |
| ING1     | 1:1 | 48.8    | 97.7    | 100000  | 200000   | 3.0 | 8  | 15 |
| GHRHR    | 1:1 | 3125.0  | 3125.0  | 400000  | 800000   | 2.1 | 9  | 17 |
| CARHSP1  | 1:1 | 781.3   | 1562.5  | 100000  | 400000   | 1.8 | 11 | 17 |
| ANXA10   | 1:1 | 48.8    | 97.7    | 25000   | 200000   | 2.4 | 8  | 19 |
| DRAXIN   | 1:1 | 97.7    | 195.3   | 50000   | 200000   | 2.4 | 8  | 9  |
| SERPINB9 | 1:1 | 1562.5  | 3125.0  | 400000  | 800000   | 2.1 | 8  | 7  |
| EFNA4    | 1:1 | 6.1     | 6.1     | 3125    | 12500    | 2.7 | 7  | 5  |
| PTPRN2   | 1:1 | 12.2    | 48.8    | 25000   | 50000    | 2.7 | 9  | 7  |
| NAAA     | 1:1 | 97.7    | 195.3   | 100000  | 800000   | 2.7 | 7  | 7  |
| CDCP1    | 1:1 | 48.8    | 97.7    | 6250    | 12500    | 1.8 | 7  | 6  |
| CLPP     | 1:1 | 48.8    | 195.3   | 100000  | 800000   | 2.7 | 7  | 10 |

|           |     |        |        |        |         |     |    |    |
|-----------|-----|--------|--------|--------|---------|-----|----|----|
| CRIP2     | 1:1 | 781.3  | 1562.5 | 200000 | 800000  | 2.1 | 7  | 6  |
| GGT5      | 1:1 | 781.3  | 1562.5 | 400000 | 800000  | 2.4 | 9  | 6  |
| MAD1L1    | 1:1 |        |        |        |         |     | 9  | 5  |
| PPP3R1    | 1:1 |        |        |        |         |     | 8  | 7  |
| IL18RAP   | 1:1 | 12.2   | 12.2   | 6250   | 50000   | 2.7 | 9  | 5  |
| NMNAT1    | 1:1 |        |        |        |         |     | 7  | 7  |
| ABHD14B   | 1:1 |        |        |        |         |     | 8  | 16 |
| FLRT2     | 1:1 | 12.2   | 48.8   | 25000  | 100000  | 2.7 | 9  | 8  |
| APRT      | 1:1 | 390.6  | 781.3  | 400000 | 800000  | 2.7 | 10 | 6  |
| TNFRSF10A | 1:1 | 6.1    | 12.2   | 6250   | 25000   | 2.7 | 10 | 6  |
| GBP4      | 1:1 | 1562.5 | 6250.0 | 800000 | 3200000 | 2.1 | 9  | 10 |
| GPKOW     | 1:1 | 3125.0 | 6250.0 | 400000 | 3200000 | 1.8 | 8  | 10 |
| CLEC10A   | 1:1 | 12.2   | 48.8   | 12500  | 50000   | 2.4 | 7  | 8  |
| AKT1S1    | 1:1 | 546.9  | 1093.8 | 70000  | 280000  | 1.8 | 9  | 16 |
| CASP10    | 1:1 | 97.7   | 195.3  | 50000  | 200000  | 2.4 | 7  | 12 |
| BAG3      | 1:1 | 97.7   | 97.7   | 50000  | 200000  | 2.7 | 9  | 6  |
| STAMBP    | 1:1 | 24.4   | 48.8   | 25000  | 200000  | 2.7 | 10 | 7  |
| VWC2      | 1:1 | 97.7   | 195.3  | 25000  | 50000   | 2.1 | 8  | 6  |
| DKK4      | 1:1 |        |        |        |         |     | 9  | 5  |
| WWP2      | 1:1 | 97.7   | 390.6  | 400000 | 800000  | 3.0 | 11 | 10 |
| PAEP      | 1:1 | 46.4   | 92.8   | 47500  | 380000  | 2.7 | 10 | 13 |
| SPOCK1    | 1:1 | 390.6  | 390.6  | 200000 | 800000  | 2.7 | 9  | 5  |
| LAYN      | 1:1 | 3.1    | 6.1    | 6250   | 50000   | 3.0 | 9  | 6  |
| SETMAR    | 1:1 | 390.6  | 1562.5 | 400000 | 800000  | 2.4 | 8  | 4  |
| FHIT      | 1:1 | 6.1    | 12.2   | 1563   | 6250    | 2.1 | 10 | 14 |
| IL6       | 1:1 | 0.8    | 1.5    | 1563   | 12500   | 3.0 | 10 | 8  |
| PTPN1     | 1:1 |        |        |        |         |     | 8  | 12 |
| IMPA1     | 1:1 | 195.3  | 781.3  | 200000 | 800000  | 2.4 | 9  | 9  |
| DARS1     | 1:1 | 48.8   | 97.7   | 100000 | 400000  | 3.0 | 10 | 13 |
| CRTAM     | 1:1 | 12.2   | 48.8   | 12500  | 200000  | 2.4 | 9  | 8  |
| NGF       | 1:1 | 48.8   | 97.7   | 12500  | 25000   | 2.1 | 7  | 4  |
| ULBP2     | 1:1 | 24.4   | 48.8   | 100000 | 200000  | 3.3 | 9  | 8  |
| PHOSPHO1  | 1:1 | 3.1    | 6.1    | 781    | 6250    | 2.1 | 8  | 6  |
| RSPO1     | 1:1 | 3.1    | 3.1    | 1563   | 12500   | 2.7 | 8  | 7  |
| TIGAR     | 1:1 | 24.4   | 195.3  | 100000 | 400000  | 2.7 | 7  | 24 |
| FKBP7     | 1:1 | 97.7   | 195.3  | 100000 | 800000  | 2.7 | 7  | 10 |
| SKAP1     | 1:1 | 48.8   | 195.3  | 50000  | 200000  | 2.4 | 8  | 8  |
| EREG      | 1:1 | 6.1    | 6.1    | 1563   | 6250    | 2.4 | 6  | 6  |
| FKBP5     | 1:1 | 97.7   | 195.3  | 25000  | 50000   | 2.1 | 9  | 6  |
| MAP4K5    | 1:1 | 12.2   | 48.8   | 6250   | 50000   | 2.1 | 6  | 10 |
| DPEP1     | 1:1 |        |        |        |         |     | 8  | 5  |
| SNCG      | 1:1 | 24.4   | 48.8   | 50000  | 800000  | 3.0 | 9  | 8  |
| TBCC      | 1:1 | 781.3  | 781.3  | 400000 | 800000  | 2.7 | 8  | 8  |
| CD63      | 1:1 | 24.4   | 48.8   | 12500  | 50000   | 2.4 | 9  | 6  |
| MATN3     | 1:1 | 12.2   | 12.2   | 25000  | 200000  | 3.3 | 7  | 6  |
| MASP1     | 1:1 | 390.6  | 781.3  | 100000 | 400000  | 2.1 | 10 | 6  |
| IFNGR2    | 1:1 | 24.4   | 48.8   | 12500  | 100000  | 2.4 | 9  | 4  |
| LAIR2     | 1:1 | 0.8    | 1.5    | 781    | 6250    | 2.7 | 10 | 6  |
| CC2D1A    | 1:1 | 97.7   | 195.3  | 100000 | 800000  | 2.7 | 9  | 6  |
| TNFRSF9   | 1:1 | 0.8    | 1.5    | 3125   | 6250    | 3.3 | 8  | 6  |
| IPCEF1    | 1:1 | 12.2   | 97.7   | 25000  | 50000   | 2.4 | 11 | 6  |
| EPHB6     | 1:1 | 12.2   | 48.8   | 25000  | 50000   | 2.7 | 9  | 6  |

|          |      |        |        |        |         |     |    |    |
|----------|------|--------|--------|--------|---------|-----|----|----|
| OBP2B    | 1:1  | 0.8    | 3.1    | 3125   | 12500   | 3.0 | 9  | 6  |
| CXCL8    | 1:1  | 0.2    | 0.4    | 1563   | 6250    | 3.6 | 7  | 5  |
| ADAM22   | 1:1  | 97.7   | 195.3  | 50000  | 200000  | 2.4 | 9  | 6  |
| RBKS     | 1:1  | 6.1    | 6.1    | 12500  | 50000   | 3.3 | 7  | 11 |
| SFRP1    | 1:1  | 24.4   | 48.8   | 50000  | 200000  | 3.0 | 18 | 20 |
| TXLNA    | 1:1  | 3.1    | 6.1    | 1563   | 12500   | 2.4 | 9  | 8  |
| AFP      | 1:1  | 12.2   | 24.4   | 25000  | 100000  | 3.0 | 9  | 4  |
| FKBP4    | 1:1  | 48.8   | 195.3  | 25000  | 50000   | 2.1 | 8  | 7  |
| BCAN     | 1:1  | 781.3  | 1562.5 | 200000 | 800000  | 2.1 | 7  | 5  |
| CD274    | 1:1  | 3.1    | 3.1    | 3125   | 50000   | 3.0 | 9  | 6  |
| CALCA    | 1:1  | 24.4   | 48.8   | 25000  | 50000   | 2.7 | 8  | 4  |
| SCARB2   | 1:1  | 3.1    | 6.1    | 6250   | 50000   | 3.0 | 8  | 6  |
| TCL1A    | 1:1  | 97.7   | 195.3  | 50000  | 200000  | 2.4 | 10 | 6  |
| PSME2    | 1:1  | 48.8   | 195.3  | 25000  | 200000  | 2.1 | 7  | 7  |
| LXN      | 1:1  | 390.6  | 390.6  | 200000 | 800000  | 2.7 | 10 | 12 |
| EIF4B    | 1:1  | 390.6  | 390.6  | 100000 | 200000  | 2.4 | 8  | 20 |
| RHOC     | 1:1  | 24.4   | 48.8   | 50000  | 200000  | 3.0 | 8  | 8  |
| MDGA1    | 1:1  | 48.8   | 97.7   | 25000  | 200000  | 2.4 | 8  | 4  |
| LPO      | 1:1  | 3.1    | 12.2   | 25000  | 200000  | 3.3 | 7  | 8  |
| TNFSF14  | 1:1  | 48.8   | 195.3  | 50000  | 200000  | 2.4 | 7  | 6  |
| DNMBP    | 1:1  | 12.2   | 24.4   | 50000  | 200000  | 3.3 | 9  | 6  |
| ACVRL1   | 1:1  | 3.1    | 6.1    | 3125   | 12500   | 2.7 | 9  | 5  |
| TNFRSF6B | 1:1  | 97.7   | 195.3  | 50000  | 200000  | 2.4 | 10 | 8  |
| PRDX1    | 1:1  | 97.7   | 195.3  | 25000  | 200000  | 2.1 | 10 | 12 |
| MITD1    | 1:1  | 3.1    | 6.1    | 25000  | 50000   | 3.6 | 9  | 8  |
| TNR      | 1:1  | 97.7   | 195.3  | 50000  | 200000  | 2.4 | 9  | 7  |
| TBCB     | 1:1  | 24.4   | 97.7   | 100000 | 400000  | 3.0 | 7  | 10 |
| BMP4     | 1:1  | 6.1    | 48.8   | 12500  | 50000   | 2.4 | 18 | 49 |
| FUT8     | 1:1  |        |        |        |         |     | 7  | 6  |
| CXCL13   | 1:10 | 3.1    | 6.1    | 1563   | 6250    | 2.4 | 6  | 10 |
| PVR      | 1:10 | 97.7   | 195.3  | 200000 | 800000  | 3.0 | 9  | 8  |
| DDR1     | 1:10 | 12.2   | 12.2   | 50000  | 400000  | 3.6 | 7  | 5  |
| ENO1     | 1:10 |        |        |        |         |     | 7  | 11 |
| SCARF2   | 1:10 | 48.8   | 97.7   | 200000 | 400000  | 3.3 | 6  | 7  |
| CPM      | 1:10 | 12.2   | 24.4   | 25000  | 200000  | 3.0 | 5  | 5  |
| NCAN     | 1:10 | 3.1    | 6.1    | 6250   | 50000   | 3.0 | 6  | 8  |
| RGMA     | 1:10 | 24.4   | 48.8   | 100000 | 400000  | 3.3 | 7  | 7  |
| GOLM2    | 1:10 | 24.4   | 48.8   | 50000  | 100000  | 3.0 | 7  | 5  |
| CXCL11   | 1:10 | 1.5    | 6.1    | 6250   | 12500   | 3.0 | 7  | 9  |
| SERPINB6 | 1:10 | 24.4   | 97.7   | 50000  | 400000  | 2.7 | 7  | 7  |
| STC1     | 1:10 |        |        |        |         |     | 7  | 7  |
| CD300C   | 1:10 | 3.1    | 6.1    | 6250   | 25000   | 3.0 | 7  | 9  |
| OXT      | 1:10 | 6.1    | 24.4   | 25000  | 200000  | 3.0 | 5  | 6  |
| SMPD1    | 1:10 | 97.7   | 195.3  | 400000 | 800000  | 3.3 | 6  | 9  |
| SULT1A1  | 1:10 | 97.7   | 195.3  | 100000 | 400000  | 2.7 | 5  | 14 |
| EZR      | 1:10 | 390.6  | 781.3  | 100000 | 400000  | 2.1 | 6  | 4  |
| VCAN     | 1:10 | 1.5    | 3.1    | 6250   | 25000   | 3.3 | 7  | 6  |
| SUMF2    | 1:10 | 24.4   | 48.8   | 6250   | 200000  | 2.1 | 6  | 5  |
| TXNDC5   | 1:10 | 3125.0 | 6250.0 | 800000 | 3200000 | 2.1 | 10 | 9  |
| CDH15    | 1:10 | 1562.5 | 3125.0 | 400000 | 800000  | 2.1 | 7  | 6  |
| CDH3     | 1:10 | 97.7   | 195.3  | 100000 | 200000  | 2.7 | 9  | 5  |
| PDCD5    | 1:10 | 6.1    | 24.4   | 12500  | 100000  | 2.7 | 8  | 13 |

|           |       |        |        |         |          |     |    |    |
|-----------|-------|--------|--------|---------|----------|-----|----|----|
| JAM2      | 1:10  | 0.4    | 1.5    | 6250    | 25000    | 3.6 | 6  | 5  |
| MSR1      | 1:10  | 12.2   | 24.4   | 12500   | 100000   | 2.7 | 6  | 8  |
| VTA1      | 1:10  | 195.3  | 390.6  | 400000  | 800000   | 3.0 | 9  | 15 |
| CHGB      | 1:10  | 390.6  | 781.3  | 400000  | 800000   | 2.7 | 7  | 7  |
| ADAM8     | 1:10  | 3.1    | 6.1    | 12500   | 25000    | 3.3 | 5  | 7  |
| DKK1      | 1:10  | 12.2   | 24.4   | 25000   | 50000    | 3.0 | 7  | 8  |
| LRPAP1    | 1:10  | 6.1    | 12.2   | 6250    | 12500    | 2.7 | 5  | 6  |
| CLEC1B    | 1:10  | 12.2   | 24.4   | 12500   | 50000    | 2.7 | 11 | 12 |
| BST2      | 1:10  | 6.1    | 12.2   | 25000   | 50000    | 3.3 | 7  | 4  |
| PRL       | 1:10  | 24.4   | 97.7   | 100000  | 400000   | 3.0 | 6  | 11 |
| SEMA4D    | 1:10  | 97.7   | 195.3  | 50000   | 400000   | 2.4 | 6  | 7  |
| CD34      | 1:10  | 97.7   | 195.3  | 200000  | 400000   | 3.0 | 7  | 12 |
| LBR       | 1:10  | 390.6  | 781.3  | 400000  | 800000   | 2.7 | 6  | 7  |
| CD8A      | 1:10  |        |        |         |          |     | 6  | 10 |
| CCL19     | 1:10  |        |        |         |          |     | 5  | 12 |
| RWDD1     | 1:10  | 24.4   | 48.8   | 100000  | 200000   | 3.3 | 7  | 11 |
| NSFL1C    | 1:10  | 48.8   | 97.7   | 100000  | 800000   | 3.0 | 8  | 8  |
| FUT3_FUT5 | 1:10  | 1.5    | 6.1    | 6250    | 50000    | 3.0 | 5  | 7  |
| CPPED1    | 1:10  | 24.4   | 48.8   | 50000   | 200000   | 3.0 | 5  | 13 |
| FOLR2     | 1:10  | 3.1    | 6.1    | 6250    | 25000    | 3.0 | 6  | 5  |
| MMP8      | 1:10  | 97.7   | 390.6  | 200000  | 800000   | 2.7 | 5  | 5  |
| BST1      | 1:10  | 48.8   | 97.7   | 50000   | 800000   | 2.7 | 6  | 7  |
| ENO2      | 1:10  | 3125.0 | 6250.0 | 3200000 | 12800000 | 2.7 | 6  | 13 |
| SCARA5    | 1:10  | 48.8   | 97.7   | 25000   | 100000   | 2.4 | 6  | 6  |
| NTRK3     | 1:10  | 12.2   | 24.4   | 25000   | 100000   | 3.0 | 6  | 5  |
| RGMB      | 1:10  | 48.8   | 195.3  | 100000  | 200000   | 2.7 | 6  | 5  |
| FABP5     | 1:10  | 24.4   | 97.7   | 100000  | 800000   | 3.0 | 14 | 34 |
| LGALS8    | 1:10  | 12.2   | 48.8   | 25000   | 100000   | 2.7 | 5  | 6  |
| ROBO2     | 1:10  | 12.2   | 24.4   | 25000   | 200000   | 3.0 | 6  | 6  |
| LAMP2     | 1:10  | 97.7   | 195.3  | 200000  | 800000   | 3.0 | 5  | 6  |
| ANXA3     | 1:10  | 195.3  | 390.6  | 100000  | 200000   | 2.4 | 7  | 8  |
| PPCDC     | 1:10  | 12.2   | 24.4   | 25000   | 200000   | 3.0 | 5  | 6  |
| TNFRSF8   | 1:10  | 12.2   | 48.8   | 50000   | 200000   | 3.0 | 5  | 6  |
| CPA2      | 1:10  | 97.7   | 195.3  | 400000  | 800000   | 3.3 | 6  | 6  |
| CTSS      | 1:10  | 1.5    | 12.2   | 12500   | 50000    | 3.0 | 7  | 6  |
| CNTN5     | 1:10  | 24.4   | 48.8   | 25000   | 100000   | 2.7 | 5  | 6  |
| TNFRSF21  | 1:10  | 24.4   | 48.8   | 25000   | 100000   | 2.7 | 6  | 6  |
| THY1      | 1:10  | 0.4    | 0.8    | 6250    | 25000    | 3.9 | 6  | 6  |
| CD74      | 1:10  | 97.7   | 195.3  | 25000   | 100000   | 2.1 | 5  | 5  |
| AHSP      | 1:100 | 6.1    | 6.1    | 6250    | 25000    | 3.0 | 7  | 5  |
| NID2      | 1:100 | 1562.5 | 3125.0 | 800000  | 800000   | 2.4 | 10 | 10 |
| CGA       | 1:100 | 0.8    | 1.5    | 6250    | 50000    | 3.6 | 7  | 6  |
| FCRL5     | 1:100 | 6.1    | 12.2   | 25000   | 800000   | 3.3 | 7  | 3  |
| IL1RAP    | 1:100 | 6.1    | 12.2   | 12500   | 50000    | 3.0 | 7  | 3  |
| IL7R      | 1:100 | 6.1    | 12.2   | 12500   | 200000   | 3.0 | 7  | 15 |
| CNTN3     | 1:100 | 6.1    | 24.4   | 12500   | 50000    | 2.7 | 6  | 4  |
| CD177     | 1:100 | 0.8    | 1.5    | 6250    | 25000    | 3.6 | 8  | 4  |
| FCER2     | 1:100 | 1.5    | 3.1    | 6250    | 25000    | 3.3 | 7  | 6  |
| PLAU      | 1:100 | 0.4    | 0.8    | 6250    | 12500    | 3.9 | 5  | 3  |
| CLEC11A   | 1:100 | 12.2   | 24.4   | 25000   | 100000   | 3.0 | 8  | 6  |
| CD99L2    | 1:100 | 0.2    | 0.8    | 3125    | 6250     | 3.6 | 6  | 7  |
| OGN       | 1:100 | 6.1    | 24.4   | 25000   | 50000    | 3.0 | 6  | 4  |

|          |       |        |        |        |        |     |    |    |
|----------|-------|--------|--------|--------|--------|-----|----|----|
| PIK3IP1  | 1:100 | 6.1    | 12.2   | 6250   | 25000  | 2.7 | 5  | 4  |
| PAMR1    | 1:100 | 24.4   | 48.8   | 25000  | 50000  | 2.7 | 7  | 5  |
| RELT     | 1:100 | 3.1    | 12.2   | 6250   | 25000  | 2.7 | 8  | 4  |
| SPINK5   | 1:100 | 97.7   | 195.3  | 25000  | 50000  | 2.1 | 7  | 3  |
| TNFRSF1B | 1:100 | 3.1    | 12.2   | 12500  | 50000  | 3.0 | 7  | 4  |
| MIF      | 1:100 | 6.1    | 12.2   | 3125   | 100000 | 2.4 | 7  | 14 |
| BIN2     | 1:100 | 3125.0 | 6250.0 | 400000 | 800000 | 1.8 | 8  | 12 |
| HARS1    | 1:100 | 48.8   | 195.3  | 100000 | 200000 | 2.7 | 6  | 16 |
| CLPS     | 1:100 | 24.4   | 48.8   | 50000  | 400000 | 3.0 | 9  | 15 |
| SERPINB1 | 1:100 | 97.7   | 390.6  | 400000 | 800000 | 3.0 | 7  | 8  |
| WARS1    | 1:100 | 48.8   | 97.7   | 200000 | 400000 | 3.3 | 7  | 17 |
| CLEC14A  | 1:100 | 48.8   | 97.7   | 200000 | 800000 | 3.3 | 5  | 5  |
| MYOC     | 1:100 |        |        |        |        |     | 6  | 8  |
| NOMO1    | 1:100 | 6.1    | 12.2   | 25000  | 200000 | 3.3 | 5  | 5  |
| NPTX1    | 1:100 | 6.1    | 12.2   | 25000  | 200000 | 3.3 | 7  | 5  |
| SUSD2    | 1:100 | 3.1    | 6.1    | 12500  | 50000  | 3.3 | 7  | 6  |
| MPO      | 1:100 | 97.7   | 195.3  | 12500  | 25000  | 1.8 | 6  | 6  |
| INHBC    | 1:100 | 24.4   | 24.4   | 12500  | 50000  | 2.7 | 8  | 7  |
| IGFBP4   | 1:100 | 390.6  | 390.6  | 100000 | 400000 | 2.4 | 8  | 5  |
| ITGAM    | 1:100 | 97.7   | 195.3  | 200000 | 400000 | 3.0 | 8  | 6  |
| APOH     | 1:100 |        |        |        |        |     | 9  | 12 |
| BCAM     | 1:100 | 24.4   | 48.8   | 6250   | 12500  | 2.1 | 6  | 6  |
| GGT1     | 1:100 | 6.1    | 24.4   | 50000  | 400000 | 3.3 | 6  | 5  |
| STIP1    | 1:100 | 24.4   | 97.7   | 25000  | 200000 | 2.4 | 9  | 7  |
| CCN5     | 1:100 |        |        |        |        |     | 11 | 13 |
| PEBP1    | 1:100 | 48.8   | 97.7   | 50000  | 400000 | 2.7 | 9  | 10 |
| IL17RA   | 1:100 | 3.1    | 6.1    | 12500  | 25000  | 3.3 | 8  | 5  |
| MMP3     | 1:100 | 6.1    | 12.2   | 6250   | 25000  | 2.7 | 6  | 4  |
| IL1R1    | 1:100 | 0.4    | 0.4    | 6250   | 12500  | 4.2 | 5  | 5  |
| CD164    | 1:100 | 24.4   | 48.8   | 12500  | 25000  | 2.4 | 8  | 5  |
| DSC2     | 1:100 | 6.1    | 24.4   | 25000  | 200000 | 3.0 | 8  | 5  |
| NRP2     | 1:100 | 24.4   | 48.8   | 25000  | 200000 | 2.7 | 10 | 7  |
| SIGLEC5  | 1:100 | 97.7   | 195.3  | 100000 | 200000 | 2.7 | 8  | 6  |
| APP      | 1:100 | 195.3  | 390.6  | 200000 | 400000 | 2.7 | 5  | 7  |
| CD109    | 1:100 | 48.8   | 97.7   | 200000 | 800000 | 3.3 | 5  | 8  |
| SOD2     | 1:100 | 390.6  | 1562.5 | 800000 | 800000 | 2.7 | 7  | 4  |
| ALDH1A1  | 1:100 | 48.8   | 97.7   | 100000 | 200000 | 3.0 | 6  | 6  |
| SPINT1   | 1:100 | 6.1    | 24.4   | 25000  | 400000 | 3.0 | 5  | 3  |
| STC2     | 1:100 | 1.5    | 3.1    | 6250   | 25000  | 3.3 | 6  | 5  |
| DSG2     | 1:100 | 195.3  | 390.6  | 25000  | 50000  | 1.8 | 7  | 5  |
| VSIG4    | 1:100 | 3.1    | 6.1    | 6250   | 25000  | 3.0 | 6  | 5  |
| IGF2R    | 1:100 | 97.7   | 97.7   | 50000  | 200000 | 2.7 | 7  | 6  |
| ARSA     | 1:100 | 24.4   | 97.7   | 25000  | 50000  | 2.4 | 5  | 6  |
| TIMP4    | 1:100 | 3.1    | 6.1    | 3125   | 12500  | 2.7 | 7  | 5  |
| GUCA2A   | 1:100 | 1.5    | 3.1    | 6250   | 25000  | 3.3 | 5  | 6  |
| FYB1     | 1:100 | 48.8   | 97.7   | 50000  | 200000 | 2.7 | 8  | 8  |
| GP6      | 1:100 | 3.1    | 3.1    | 6250   | 25000  | 3.3 | 7  | 6  |
| TREML2   | 1:100 | 3.1    | 6.1    | 6250   | 25000  | 3.0 | 7  | 5  |
| TNXB     | 1:100 | 97.7   | 390.6  | 50000  | 400000 | 2.1 | 6  | 3  |
| PECAM1   | 1:100 | 6.1    | 12.2   | 50000  | 100000 | 3.6 | 8  | 4  |
| F11R     | 1:100 | 0.4    | 0.8    | 3125   | 6250   | 3.6 | 11 | 6  |
| BLVRB    | 1:100 | 97.7   | 390.6  | 200000 | 400000 | 2.7 | 8  | 6  |

|          |       |        |        |        |        |     |    |    |
|----------|-------|--------|--------|--------|--------|-----|----|----|
| CD99     | 1:100 | 1.5    | 3.1    | 6250   | 25000  | 3.3 | 6  | 3  |
| PIGR     | 1:100 | 48.8   | 97.7   | 50000  | 200000 | 2.7 | 6  | 4  |
| CNTN4    | 1:100 | 48.8   | 97.7   | 50000  | 400000 | 2.7 | 6  | 5  |
| GNLY     | 1:100 | 3.1    | 6.1    | 12500  | 50000  | 3.3 | 8  | 9  |
| MMP9     | 1:100 | 97.7   | 195.3  | 50000  | 400000 | 2.4 | 7  | 5  |
| TFF1     | 1:100 | 3.1    | 6.1    | 6250   | 25000  | 3.0 | 7  | 5  |
| GRN      | 1:100 | 12.2   | 48.8   | 12500  | 25000  | 2.4 | 7  | 5  |
| CA2      | 1:100 | 97.7   | 195.3  | 200000 | 800000 | 3.0 | 8  | 6  |
| PARK7    | 1:100 | 6.1    | 12.2   | 3125   | 12500  | 2.4 | 7  | 9  |
| CTRB1    | 1:100 | 1.5    | 3.1    | 12500  | 25000  | 3.6 | 6  | 4  |
| NUDT5    | 1:100 | 48.8   | 97.7   | 25000  | 50000  | 2.4 | 7  | 10 |
| MFGE8    | 1:100 | 48.8   | 97.7   | 200000 | 800000 | 3.3 | 8  | 5  |
| PILRA    | 1:100 | 0.8    | 1.5    | 12500  | 25000  | 3.9 | 5  | 4  |
| TXNRD1   | 1:100 | 1.5    | 6.1    | 6250   | 25000  | 3.0 | 8  | 4  |
| MESD     | 1:100 | 1562.5 | 3125.0 | 800000 | 800000 | 2.4 | 8  | 13 |
| THBS2    | 1:100 | 24.4   | 48.8   | 100000 | 800000 | 3.3 | 6  | 4  |
| HAVCR2   | 1:100 | 1.5    | 3.1    | 6250   | 25000  | 3.3 | 6  | 4  |
| PLA2G7   | 1:100 | 195.3  | 390.6  | 200000 | 800000 | 2.7 | 7  | 5  |
| ITGA5    | 1:100 | 24.4   | 48.8   | 50000  | 400000 | 3.0 | 10 | 9  |
| TMSB10   | 1:100 | 48.8   | 97.7   | 12500  | 25000  | 2.1 | 7  | 6  |
| EFNA1    | 1:100 | 97.7   | 195.3  | 12500  | 25000  | 1.8 | 8  | 7  |
| SPINK1   | 1:100 | 24.4   | 48.8   | 12500  | 25000  | 2.4 | 8  | 5  |
| LILRA2   | 1:100 | 24.4   | 48.8   | 12500  | 50000  | 2.4 | 6  | 4  |
| DBI      | 1:100 | 12.2   | 24.4   | 12500  | 25000  | 2.7 | 7  | 7  |
| TNFRSF1A | 1:100 | 1.5    | 6.1    | 12500  | 25000  | 3.3 | 7  | 3  |
| CA6      | 1:100 | 6.1    | 12.2   | 12500  | 25000  | 3.0 | 9  | 7  |
| CD300LG  | 1:100 | 24.4   | 48.8   | 6250   | 25000  | 2.1 | 7  | 6  |
| B4GAT1   | 1:100 | 24.4   | 97.7   | 50000  | 400000 | 2.7 | 7  | 6  |
| NCAM2    | 1:100 | 24.4   | 48.8   | 25000  | 200000 | 2.7 | 7  | 5  |
| DNLZ     | 1:1   | 3125.0 | 3125.0 | 200000 | 800000 | 1.8 | 19 | 26 |
| KIF20B   | 1:1   | 12.2   | 48.8   | 12500  | 100000 | 2.4 | 18 | 12 |
| CNGB3    | 1:1   | 781.3  | 781.3  | 50000  | 200000 | 1.8 | 15 | 17 |
| CNTF     | 1:1   | 195.3  | 390.6  | 400000 | 800000 | 3.0 |    |    |
| DCUN1D1  | 1:1   | 1562.5 | 3125.0 | 200000 | 800000 | 1.8 | 18 |    |
| GABRA4   | 1:1   | 3125.0 | 3125.0 | 100000 | 400000 | 1.5 |    |    |
| RANBP2   | 1:1   | 3125.0 | 3125.0 | 400000 | 800000 | 2.1 |    |    |
| KCNC4    | 1:1   | 195.3  | 390.6  | 25000  | 100000 | 1.8 | 6  | 10 |
| ART5     | 1:1   | 390.6  | 1562.5 | 100000 | 400000 | 1.8 | 13 |    |
| CEND1    | 1:1   | 6.1    | 24.4   | 6250   | 25000  | 2.4 | 15 | 13 |
| GPR101   | 1:1   | 48.8   | 97.7   | 12500  | 50000  | 2.1 | 9  | 7  |
| CTNNA1   | 1:1   | 6250.0 | 6250.0 | 200000 | 800000 | 1.5 | 7  | 20 |
| CACNA1C  | 1:1   | 781.3  | 781.3  | 100000 | 800000 | 2.1 | 11 | 36 |
| LYPLA2   | 1:1   |        |        |        |        |     | 8  | 32 |
| CD3D     | 1:1   | 390.6  | 390.6  | 50000  | 400000 | 2.1 | 4  |    |
| BRD2     | 1:1   | 1562.5 | 3125.0 | 200000 | 400000 | 1.8 | 7  | 6  |
| TJP3     | 1:1   | 1562.5 | 3125.0 | 400000 | 800000 | 2.1 | 12 | 20 |
| HTR1A    | 1:1   | 1562.5 | 1562.5 | 100000 | 800000 | 1.8 | 11 | 20 |
| DEFB116  | 1:1   | 195.3  | 195.3  | 12500  | 100000 | 1.8 | 10 | 4  |
| TUBB3    | 1:1   | 1562.5 | 1562.5 | 200000 | 800000 | 2.1 | 7  |    |
| IGDCC3   | 1:1   | 1562.5 | 1562.5 | 100000 | 800000 | 1.8 | 13 |    |
| LMOD2    | 1:1   | 781.3  | 1562.5 | 50000  | 400000 | 1.5 | 19 | 35 |
| CLIC5    | 1:1   | 12.2   | 24.4   | 6250   | 25000  | 2.4 | 8  | 6  |

|               |     |          |          |         |          |     |    |    |
|---------------|-----|----------|----------|---------|----------|-----|----|----|
| CLEC2L        | 1:1 | 195.3    | 195.3    | 50000   | 200000   | 2.4 | 13 |    |
| DYNLT1        | 1:1 | 390.6    | 781.3    | 50000   | 100000   | 1.8 | 14 | 19 |
| CACNB1        | 1:1 | 781.3    | 781.3    | 50000   | 400000   | 1.8 | 7  |    |
| CRYM          | 1:1 |          |          |         |          |     | 13 | 17 |
| CDKL5         | 1:1 | 1562.5   | 1562.5   | 100000  | 800000   | 1.8 | 7  | 33 |
| OTOA          | 1:1 | 97.7     | 195.3    | 50000   | 400000   | 2.4 | 10 | 20 |
| AGBL2         | 1:1 | 390.6    | 781.3    | 50000   | 800000   | 1.8 | 21 | 22 |
| FH            | 1:1 |          |          |         |          |     | 10 | 27 |
| C2orf69       | 1:1 | 1562.5   | 3125.0   | 400000  | 800000   | 2.1 | 14 | 15 |
| TP73          | 1:1 | 1562.5   | 1562.5   | 800000  | 800000   | 2.7 | 4  | 7  |
| FZD10         | 1:1 | 200000.0 | 200000.0 | 6400000 | 12800000 | 1.5 |    |    |
| BOLA1         | 1:1 | 1562.5   | 3125.0   | 400000  | 800000   | 2.1 | 19 | 11 |
| DOCK9         | 1:1 | 195.3    | 390.6    | 100000  | 400000   | 2.4 | 12 | 34 |
| OMP           | 1:1 | 6.1      | 24.4     | 3125    | 25000    | 2.1 | 5  | 10 |
| ITPRIP        | 1:1 | 195.3    | 195.3    | 12500   | 800000   | 1.8 | 13 | 15 |
| CBLN1         | 1:1 | 6250.0   | 6250.0   | 400000  | 1600000  | 1.8 | 14 |    |
| ATXN2         | 1:1 | 781.3    | 781.3    | 50000   | 400000   | 1.8 | 12 | 28 |
| DEFB104A_DEFB | 1:1 | 97.7     | 390.6    | 25000   | 100000   | 1.8 | 10 | 21 |
| CGN           | 1:1 | 781.3    | 1562.5   | 100000  | 200000   | 1.8 | 9  | 8  |
| DGCR6         | 1:1 | 390.6    | 781.3    | 50000   | 100000   | 1.8 | 13 | 13 |
| GRIK2         | 1:1 | 12.2     | 24.4     | 50000   | 100000   | 3.3 | 12 | 17 |
| MAP1LC3A      | 1:1 | 3125.0   | 3125.0   | 800000  | 800000   | 2.4 | 10 |    |
| BLOC1S2       | 1:1 | 195.3    | 390.6    | 25000   | 100000   | 1.8 | 24 | 5  |
| ELAVL4        | 1:1 | 24.4     | 195.3    | 12500   | 50000    | 1.8 | 15 | 24 |
| TMPRSS11B     | 1:1 | 390.6    | 781.3    | 50000   | 800000   | 1.8 | 4  |    |
| CHP1          | 1:1 | 12500.0  | 12500.0  | 400000  | 800000   | 1.5 | 13 | 22 |
| CORO6         | 1:1 | 3125.0   | 12500.0  | 800000  | 800000   | 1.8 | 14 | 21 |
| ARHGEF5       | 1:1 | 390.6    | 390.6    | 25000   | 50000    | 1.8 | 16 | 25 |
| LEO1          | 1:1 | 781.3    | 781.3    | 100000  | 800000   | 2.1 | 8  | 13 |
| PPP1R14D      | 1:1 | 781.3    | 781.3    | 50000   | 200000   | 1.8 | 10 | 19 |
| MRPL28        | 1:1 | 1562.5   | 1562.5   | 800000  | 800000   | 2.7 | 9  | 6  |
| NMT1          | 1:1 |          |          |         |          |     | 8  | 32 |
| LRTM2         | 1:1 | 24.4     | 48.8     | 12500   | 50000    | 2.4 | 9  | 9  |
| IFNL2         | 1:1 | 3125.0   | 3125.0   | 400000  | 800000   | 2.1 | 6  | 10 |
| RAB3GAP1      | 1:1 | 1562.5   | 1562.5   | 50000   | 400000   | 1.5 | 8  | 11 |
| SYNGAP1       | 1:1 | 48.8     | 97.7     | 12500   | 100000   | 2.1 | 5  | 13 |
| TFAP2A        | 1:1 | 3125.0   | 6250.0   | 200000  | 800000   | 1.5 | 13 |    |
| BRME1         | 1:1 | 25000.0  | 25000.0  | 1600000 | 12800000 | 1.8 | 11 | 27 |
| HTR1B         | 1:1 |          |          |         |          |     | 8  | 4  |
| BCAT2         | 1:1 | 195.3    | 390.6    | 50000   | 400000   | 2.1 |    |    |
| STEAP4        | 1:1 | 48.8     | 48.8     | 12500   | 100000   | 2.4 | 11 | 17 |
| LELP1         | 1:1 |          |          |         |          |     | 4  |    |
| PNMA2         | 1:1 | 12500.0  | 12500.0  | 800000  | 800000   | 1.8 | 7  | 22 |
| CSPG5         | 1:1 | 390.6    | 390.6    | 50000   | 800000   | 2.1 | 16 | 23 |
| CNTNAP4       | 1:1 | 390.6    | 390.6    | 25000   | 100000   | 1.8 | 7  | 17 |
| ARHGEF10      | 1:1 | 390.6    | 1562.5   | 100000  | 200000   | 1.8 | 6  | 22 |
| FCER1A        | 1:1 | 390.6    | 781.3    | 50000   | 200000   | 1.8 | 12 | 11 |
| CACNB3        | 1:1 | 781.3    | 1562.5   | 100000  | 200000   | 1.8 | 11 | 35 |
| RBM17         | 1:1 |          |          |         |          |     | 13 | 25 |
| AMPD3         | 1:1 |          |          |         |          |     | 4  | 21 |
| ZHX2          | 1:1 | 390.6    | 390.6    | 50000   | 100000   | 2.1 | 6  | 8  |
| DNAJA4        | 1:1 |          |          |         |          |     | 8  | 16 |

|          |     |         |         |         |         |     |     |    |
|----------|-----|---------|---------|---------|---------|-----|-----|----|
| HLA-A    | 1:1 |         |         |         |         |     | 9   | 9  |
| GID8     | 1:1 | 781.3   | 781.3   | 25000   | 100000  | 1.5 | 6   |    |
| LDLRAP1  | 1:1 | 12500.0 | 12500.0 | 800000  | 1600000 | 1.8 |     |    |
| VGFB     | 1:1 |         |         |         |         |     | 9   | 10 |
| NEO1     | 1:1 | 97.7    | 97.7    | 25000   | 50000   | 2.4 | 8   | 12 |
| IL13RA2  | 1:1 | 1562.5  | 1562.5  | 800000  | 800000  | 2.7 | 10  |    |
| RRP15    | 1:1 | 781.3   | 781.3   | 100000  | 800000  | 2.1 |     |    |
| MYL6B    | 1:1 | 3125.0  | 3125.0  | 100000  | 800000  | 1.5 | 14  | 25 |
| CABP2    | 1:1 | 1562.5  | 3125.0  | 200000  | 800000  | 1.8 | 16  | 25 |
| CADPS    | 1:1 | 195.3   | 390.6   | 100000  | 200000  | 2.4 | 10  | 13 |
| OTUD7B   | 1:1 | 390.6   | 781.3   | 200000  | 800000  | 2.4 | 8   | 19 |
| PDLIM5   | 1:1 | 390.6   | 781.3   | 100000  | 400000  | 2.1 | 7   | 37 |
| MRI1     | 1:1 |         |         |         |         |     | 9   | 36 |
| DOC2B    | 1:1 | 195.3   | 390.6   | 100000  | 200000  | 2.4 | 8   | 15 |
| SLC1A4   | 1:1 | 12500.0 | 25000.0 | 1600000 | 6400000 | 1.8 | 9   | 20 |
| DUSP29   | 1:1 | 390.6   | 390.6   | 50000   | 200000  | 2.1 | 16  | 22 |
| MYL6B    | 1:1 | 1562.5  | 1562.5  | 100000  | 400000  | 1.8 | 12  | 16 |
| PGM2     | 1:1 | 390.6   | 781.3   | 200000  | 800000  | 2.4 | 11  | 28 |
| SCN3A    | 1:1 | 781.3   | 781.3   | 50000   | 800000  | 1.8 |     |    |
| CRTAP    | 1:1 |         |         |         |         |     | 4   |    |
| TARM1    | 1:1 | 195.3   | 390.6   | 50000   | 800000  | 2.1 |     |    |
| NRXN3    | 1:1 | 390.6   | 390.6   | 25000   | 800000  | 1.8 | 6   | 31 |
| ARMCX2   | 1:1 | 781.3   | 1562.5  | 100000  | 800000  | 1.8 |     |    |
| INPP5J   | 1:1 | 195.3   | 195.3   | 50000   | 100000  | 2.4 | 16  | 29 |
| SOX2     | 1:1 | 781.3   | 1562.5  | 100000  | 400000  | 1.8 | 2   |    |
| HJV      | 1:1 | 781.3   | 1562.5  | 100000  | 200000  | 1.8 | 12  | 10 |
| RGS10    | 1:1 | 195.3   | 195.3   | 25000   | 100000  | 2.1 | 8   | 24 |
| GIGYF2   | 1:1 | 390.6   | 390.6   | 50000   | 200000  | 2.1 | 9   | 16 |
| PIBF1    | 1:1 | 195.3   | 195.3   | 50000   | 200000  | 2.4 | 11  | 31 |
| RGCC     | 1:1 | 1562.5  | 3125.0  | 200000  | 800000  | 1.8 | 8   | 31 |
| OCLN     | 1:1 | 195.3   | 195.3   | 25000   | 100000  | 2.1 | 9   | 12 |
| IGBP1    | 1:1 | 1562.5  | 1562.5  | 100000  | 400000  | 1.8 | 11  | 21 |
| TOM1L2   | 1:1 |         |         |         |         |     | 12  | 37 |
| AZI2     | 1:1 | 781.3   | 1562.5  | 400000  | 800000  | 2.4 | 10  | 25 |
| MYOM1    | 1:1 | 195.3   | 781.3   | 50000   | 200000  | 1.8 | 12  |    |
| SCN2A    | 1:1 | 195.3   | 390.6   | 25000   | 100000  | 1.8 | 9   | 23 |
| UPK3A    | 1:1 | 781.3   | 781.3   | 50000   | 200000  | 1.8 |     |    |
| KIRREL1  | 1:1 | 1562.5  | 1562.5  | 200000  | 800000  | 2.1 | 9   | 14 |
| HDAC9    | 1:1 |         |         |         |         |     | 8   | 22 |
| ECSCR    | 1:1 |         |         |         |         |     | 0.1 |    |
| LRFN2    | 1:1 |         |         |         |         |     | 21  |    |
| SNAPIN   | 1:1 | 781.3   | 781.3   | 100000  | 400000  | 2.1 | 11  | 23 |
| FAM171A2 | 1:1 | 781.3   | 1562.5  | 100000  | 400000  | 1.8 | 9   | 28 |
| ASPSCR1  | 1:1 | 390.6   | 781.3   | 200000  | 800000  | 2.4 | 14  | 22 |
| STXBP1   | 1:1 | 1562.5  | 3125.0  | 400000  | 800000  | 2.1 |     |    |
| CSNK2A1  | 1:1 |         |         |         |         |     | 7   | 22 |
| GRIN2B   | 1:1 | 1562.5  | 6250.0  | 400000  | 800000  | 1.8 | 9   | 12 |
| ZPR1     | 1:1 | 781.3   | 781.3   | 50000   | 800000  | 1.8 | 13  | 23 |
| SNAP25   | 1:1 | 97.7    | 390.6   | 50000   | 400000  | 2.1 | 14  | 23 |
| PCARE    | 1:1 | 390.6   | 781.3   | 50000   | 100000  | 1.8 | 13  | 8  |
| KRT8     | 1:1 | 24.4    | 195.3   | 400000  | 800000  | 3.3 | 13  | 28 |
| ARID3A   | 1:1 |         |         |         |         |     | 12  |    |



|         |     |         |         |         |         |     |    |    |
|---------|-----|---------|---------|---------|---------|-----|----|----|
| DEFB118 | 1:1 | 3125.0  | 6250.0  | 200000  | 800000  | 1.5 | 3  | 1  |
| SMS     | 1:1 | 3125.0  | 3125.0  | 200000  | 400000  | 1.8 | 9  | 21 |
| SCIN    | 1:1 | 48.8    | 48.8    | 25000   | 100000  | 2.7 | 12 | 16 |
| FARSA   | 1:1 | 97.7    | 781.3   | 100000  | 200000  | 2.1 | 10 | 19 |
| EPB41L5 | 1:1 | 781.3   | 1562.5  | 100000  | 400000  | 1.8 | 19 | 31 |
| KLRC1   | 1:1 | 195.3   | 390.6   | 50000   | 100000  | 2.1 | 2  |    |
| TRIM40  | 1:1 |         |         |         |         |     |    |    |
| ADGRV1  | 1:1 | 781.3   | 781.3   | 100000  | 400000  | 2.1 | 19 | 34 |
| SPTBN2  | 1:1 | 195.3   | 390.6   | 25000   | 100000  | 1.8 | 7  |    |
| CDH4    | 1:1 | 390.6   | 781.3   | 50000   | 200000  | 1.8 | 9  | 2  |
| SAG     | 1:1 | 3125.0  | 3125.0  | 200000  | 400000  | 1.8 |    |    |
| BHLHE40 | 1:1 | 195.3   | 390.6   | 50000   | 400000  | 2.1 | 11 | 26 |
| TXNL1   | 1:1 |         |         |         |         |     | 11 | 32 |
| MICALL2 | 1:1 | 1562.5  | 1562.5  | 50000   | 800000  | 1.5 | 16 | 15 |
| SOWAHA  | 1:1 | 781.3   | 1562.5  | 200000  | 800000  | 2.1 | 14 | 38 |
| TDO2    | 1:1 | 12.2    | 48.8    | 12500   | 50000   | 2.4 | 12 | 16 |
| OSTN    | 1:1 | 3125.0  | 3125.0  | 100000  | 200000  | 1.5 | 11 | 21 |
| MN1     | 1:1 | 781.3   | 781.3   | 50000   | 800000  | 1.8 | 11 | 24 |
| NLGN1   | 1:1 | 1562.5  | 1562.5  | 100000  | 800000  | 1.8 | 13 | 16 |
| KCNH2   | 1:1 | 1562.5  | 1562.5  | 50000   | 400000  | 1.5 | 6  | 7  |
| PFDN6   | 1:1 | 3125.0  | 6250.0  | 800000  | 800000  | 2.1 | 18 | 18 |
| STX1B   | 1:1 | 390.6   | 1562.5  | 200000  | 800000  | 2.1 | 13 | 10 |
| CUZD1   | 1:1 | 6.1     | 24.4    | 6250    | 50000   | 2.4 | 8  | 33 |
| TPBGL   | 1:1 | 25000.0 | 25000.0 | 1600000 | 6400000 | 1.8 | 16 | 34 |
| CHRM1   | 1:1 | 1562.5  | 3125.0  | 200000  | 800000  | 1.8 | 12 | 5  |
| LRRC38  | 1:1 | 1562.5  | 3125.0  | 400000  | 800000  | 2.1 | 9  | 10 |
| TBR1    | 1:1 | 1562.5  | 1562.5  | 200000  | 800000  | 2.1 | 6  |    |
| FRMD7   | 1:1 | 1562.5  | 1562.5  | 50000   | 800000  | 1.5 | 7  | 3  |
| CD164L2 | 1:1 | 390.6   | 781.3   | 50000   | 200000  | 1.8 |    |    |
| GNGT1   | 1:1 | 390.6   | 390.6   | 25000   | 100000  | 1.8 | 11 | 14 |
| HNF1A   | 1:1 | 6250.0  | 6250.0  | 400000  | 800000  | 1.8 | 9  | 8  |
| PSMD5   | 1:1 | 390.6   | 390.6   | 100000  | 800000  | 2.4 | 11 | 13 |
| MFAP3L  | 1:1 |         |         |         |         |     | 6  | 17 |
| CASC3   | 1:1 |         |         |         |         |     | 10 | 21 |
| DTX2    | 1:1 | 1562.5  | 3125.0  | 200000  | 800000  | 1.8 | 13 | 9  |
| AMIGO1  | 1:1 | 781.3   | 781.3   | 25000   | 800000  | 1.5 | 11 | 21 |
| ERC2    | 1:1 | 97.7    | 195.3   | 100000  | 200000  | 2.7 | 16 | 23 |
| SLC44A4 | 1:1 | 195.3   | 390.6   | 100000  | 200000  | 2.4 | 5  |    |
| NLGN2   | 1:1 | 3125.0  | 3125.0  | 200000  | 800000  | 1.8 | 10 |    |
| CLNS1A  | 1:1 | 1562.5  | 1562.5  | 100000  | 800000  | 1.8 | 10 | 23 |
| NAA80   | 1:1 | 781.3   | 3125.0  | 200000  | 400000  | 1.8 | 11 | 30 |
| DDX25   | 1:1 |         |         |         |         |     |    |    |
| TMCO5A  | 1:1 | 390.6   | 1562.5  | 100000  | 200000  | 1.8 | 14 | 19 |
| BATF    | 1:1 | 48.8    | 97.7    | 25000   | 50000   | 2.4 | 11 | 9  |
| MSLNL   | 1:1 | 781.3   | 1562.5  | 100000  | 800000  | 1.8 | 11 | 16 |
| PRKAG3  | 1:1 | 12500.0 | 12500.0 | 400000  | 1600000 | 1.5 |    |    |
| SEZ6    | 1:1 | 781.3   | 781.3   | 50000   | 200000  | 1.8 | 15 | 21 |
| GBA     | 1:1 | 50000.0 | 50000.0 | 1600000 | 6400000 | 1.5 |    |    |
| SV2A    | 1:1 | 195.3   | 390.6   | 100000  | 400000  | 2.4 | 19 | 29 |
| PTH     | 1:1 |         |         |         |         |     |    |    |
| IFT20   | 1:1 | 781.3   | 781.3   | 25000   | 100000  | 1.5 | 12 | 13 |
| RRAS    | 1:1 | 390.6   | 390.6   | 100000  | 200000  | 2.4 | 16 | 30 |

|          |     |        |         |        |         |     |    |    |
|----------|-----|--------|---------|--------|---------|-----|----|----|
| LRP2     | 1:1 | 1562.5 | 1562.5  | 100000 | 800000  | 1.8 | 23 | 34 |
| RPGR     | 1:1 | 781.3  | 781.3   | 50000  | 200000  | 1.8 | 15 | 16 |
| CLGN     | 1:1 | 6.1    | 48.8    | 25000  | 50000   | 2.7 | 16 | 22 |
| FZD8     | 1:1 |        |         |        |         |     | 22 | 13 |
| KLF4     | 1:1 | 781.3  | 1562.5  | 200000 | 800000  | 2.1 | 12 | 14 |
| SCN3B    | 1:1 | 6250.0 | 6250.0  | 800000 | 800000  | 2.1 |    |    |
| GLP1R    | 1:1 |        |         |        |         |     |    |    |
| TSPAN7   | 1:1 |        |         |        |         |     | 11 |    |
| IMPG1    | 1:1 | 781.3  | 1562.5  | 100000 | 400000  | 1.8 | 10 | 10 |
| VAV3     | 1:1 | 97.7   | 195.3   | 25000  | 100000  | 2.1 | 7  | 19 |
| SH3BGRL2 | 1:1 | 6250.0 | 12500.0 | 800000 | 3200000 | 1.8 | 13 | 28 |
| AIDA     | 1:1 |        |         |        |         |     |    |    |
| AKR1B10  | 1:1 | 6250.0 | 6250.0  | 200000 | 800000  | 1.5 | 16 |    |
| EFNB2    | 1:1 | 390.6  | 781.3   | 100000 | 800000  | 2.1 | 22 | 17 |
| DCC      | 1:1 |        |         |        |         |     | 11 | 11 |
| CAMLG    | 1:1 | 781.3  | 1562.5  | 100000 | 200000  | 1.8 | 12 | 26 |
| SCT      | 1:1 |        |         |        |         |     | 9  | 26 |
| LYSMD3   | 1:1 | 97.7   | 195.3   | 100000 | 400000  | 2.7 | 14 | 39 |
| CHM      | 1:1 | 195.3  | 390.6   | 25000  | 100000  | 1.8 |    |    |
| SPACA5   | 1:1 | 12.2   | 24.4    | 6250   | 25000   | 2.4 | 9  | 11 |
| MYO6     | 1:1 |        |         |        |         |     | 8  | 23 |
| NFIC     | 1:1 | 3125.0 | 3125.0  | 800000 | 800000  | 2.4 | 10 | 19 |
| S100A14  | 1:1 | 195.3  | 390.6   | 50000  | 400000  | 2.1 | 10 | 17 |
| KLHL41   | 1:1 | 390.6  | 390.6   | 200000 | 400000  | 2.7 | 14 | 20 |
| CDK5RAP3 | 1:1 |        |         |        |         |     | 12 | 16 |
| RBFOX3   | 1:1 | 24.4   | 48.8    | 6250   | 100000  | 2.1 | 9  | 10 |
| LRP2BP   | 1:1 |        |         |        |         |     | 10 | 11 |
| LRTM1    | 1:1 | 3125.0 | 3125.0  | 100000 | 200000  | 1.5 | 9  | 20 |
| UROS     | 1:1 | 195.3  | 390.6   | 25000  | 800000  | 1.8 |    |    |
| COL28A1  | 1:1 | 781.3  | 781.3   | 100000 | 400000  | 2.1 | 13 | 20 |
| NRN1     | 1:1 |        |         |        |         |     | 6  |    |
| TEX101   | 1:1 | 12.2   | 24.4    | 6250   | 25000   | 2.4 | 12 | 19 |
| TPSD1    | 1:1 | 195.3  | 390.6   | 50000  | 200000  | 2.1 | 12 | 14 |
| SOX9     | 1:1 | 781.3  | 1562.5  | 100000 | 400000  | 1.8 | 16 |    |
| PDRG1    | 1:1 | 3125.0 | 3125.0  | 100000 | 800000  | 1.5 | 14 | 19 |
| RBP1     | 1:1 | 390.6  | 781.3   | 50000  | 800000  | 1.8 | 12 | 20 |
| DIPK1C   | 1:1 | 3125.0 | 3125.0  | 200000 | 800000  | 1.8 | 10 | 22 |
| ATXN2L   | 1:1 | 3125.0 | 3125.0  | 400000 | 800000  | 2.1 | 7  | 11 |
| SPAG1    | 1:1 |        |         |        |         |     | 11 | 15 |
| SORBS1   | 1:1 | 1562.5 | 1562.5  | 50000  | 200000  | 1.5 | 6  | 17 |
| DLGAP5   | 1:1 | 195.3  | 195.3   | 50000  | 400000  | 2.4 | 6  | 23 |
| FBN2     | 1:1 |        |         |        |         |     |    |    |
| CCDC28A  | 1:1 |        |         |        |         |     |    |    |
| TTF2     | 1:1 | 390.6  | 390.6   | 25000  | 100000  | 1.8 |    |    |
| SEPTIN3  | 1:1 | 781.3  | 1562.5  | 800000 | 800000  | 2.7 | 7  | 18 |
| ARFIP1   | 1:1 | 390.6  | 1562.5  | 400000 | 800000  | 2.4 | 13 | 29 |
| RAC3     | 1:1 |        |         |        |         |     | 9  | 11 |
| AP2B1    | 1:1 |        |         |        |         |     | 12 | 20 |
| CIT      | 1:1 | 48.8   | 48.8    | 25000  | 100000  | 2.7 | 15 | 30 |
| SCN2B    | 1:1 | 781.3  | 1562.5  | 100000 | 800000  | 1.8 |    |    |
| MAG      | 1:1 |        |         |        |         |     | 19 | 22 |
| GTPBP2   | 1:1 | 781.3  | 781.3   | 50000  | 200000  | 1.8 | 12 | 24 |

|          |     |         |         |         |          |     |    |    |
|----------|-----|---------|---------|---------|----------|-----|----|----|
| DDX53    | 1:1 | 390.6   | 781.3   | 100000  | 800000   | 2.1 | 12 |    |
| PAFAH1B3 | 1:1 | 6250.0  | 6250.0  | 800000  | 800000   | 2.1 | 10 |    |
| PMS1     | 1:1 | 48.8    | 97.7    | 12500   | 50000    | 2.1 | 21 | 24 |
| PPT1     | 1:1 | 3125.0  | 3125.0  | 200000  | 800000   | 1.8 | 9  | 26 |
| MDM1     | 1:1 | 1562.5  | 1562.5  | 100000  | 200000   | 1.8 | 11 | 19 |
| LETM1    | 1:1 | 781.3   | 781.3   | 50000   | 200000   | 1.8 | 11 | 22 |
| DNM3     | 1:1 | 390.6   | 390.6   | 100000  | 800000   | 2.4 | 9  | 22 |
| SLA2     | 1:1 | 3125.0  | 6250.0  | 800000  | 800000   | 2.1 | 10 | 35 |
| TSC22D1  | 1:1 | 390.6   | 390.6   | 25000   | 100000   | 1.8 | 13 | 19 |
| CCDC50   | 1:1 | 781.3   | 1562.5  | 400000  | 800000   | 2.4 | 10 | 13 |
| TMEM25   | 1:1 | 97.7    | 97.7    | 25000   | 100000   | 2.4 | 9  | 11 |
| LMOD1    | 1:1 | 24.4    | 48.8    | 12500   | 50000    | 2.4 | 8  | 23 |
| FTCD     | 1:1 | 781.3   | 3125.0  | 100000  | 800000   | 1.5 | 5  | 19 |
| GPR158   | 1:1 | 781.3   | 781.3   | 50000   | 200000   | 1.8 | 9  | 9  |
| VWC2L    | 1:1 | 48.8    | 97.7    | 12500   | 50000    | 2.1 | 9  | 16 |
| SAFB2    | 1:1 | 781.3   | 1562.5  | 100000  | 400000   | 1.8 | 9  | 10 |
| ARHGEF1  | 1:1 | 12500.0 | 12500.0 | 6400000 | 12800000 | 2.7 | 6  | 23 |
| PPP1R14A | 1:1 |         |         |         |          |     | 11 | 32 |
| PCBP2    | 1:1 | 25000.0 | 25000.0 | 800000  | 3200000  | 1.5 | 7  | 23 |
| EDF1     | 1:1 |         |         |         |          |     | 13 | 22 |
| PHACTR2  | 1:1 | 781.3   | 781.3   | 100000  | 800000   | 2.1 |    |    |
| GNAS     | 1:1 |         |         |         |          |     | 7  | 25 |
| GART     | 1:1 | 781.3   | 1562.5  | 50000   | 200000   | 1.5 | 5  | 23 |
| C1QBP    | 1:1 | 48.8    | 195.3   | 50000   | 100000   | 2.4 | 8  | 12 |
| GOLGA3   | 1:1 | 781.3   | 781.3   | 400000  | 800000   | 2.7 | 10 | 17 |
| RNASEH2A | 1:1 | 1562.5  | 3125.0  | 400000  | 800000   | 2.1 | 9  | 21 |
| EIF4G3   | 1:1 | 1562.5  | 6250.0  | 400000  | 800000   | 1.8 | 11 | 21 |
| HNRNPUL1 | 1:1 | 97.7    | 195.3   | 25000   | 50000    | 2.1 | 7  | 15 |
| MCEE     | 1:1 | 6250.0  | 6250.0  | 400000  | 800000   | 1.8 | 11 | 12 |
| LCN15    | 1:1 | 97.7    | 390.6   | 100000  | 400000   | 2.4 | 8  | 12 |
| SUOX     | 1:1 | 97.7    | 390.6   | 50000   | 100000   | 2.1 | 9  | 18 |
| SATB1    | 1:1 | 195.3   | 390.6   | 100000  | 400000   | 2.4 | 7  | 7  |
| RLN1     | 1:1 | 1562.5  | 6250.0  | 400000  | 800000   | 1.8 | 5  | 26 |
| RTN4IP1  | 1:1 | 781.3   | 781.3   | 200000  | 800000   | 2.4 | 8  | 35 |
| REEP4    | 1:1 | 195.3   | 390.6   | 100000  | 800000   | 2.4 | 6  | 9  |
| DSCAM    | 1:1 | 195.3   | 195.3   | 50000   | 200000   | 2.4 | 9  | 7  |
| MYCBP2   | 1:1 | 390.6   | 390.6   | 100000  | 800000   | 2.4 | 9  | 20 |
| ELAC1    | 1:1 | 390.6   | 390.6   | 50000   | 400000   | 2.1 | 9  | 25 |
| MRPL58   | 1:1 | 781.3   | 1562.5  | 50000   | 800000   | 1.5 | 12 | 22 |
| FGD3     | 1:1 | 97.7    | 195.3   | 25000   | 100000   | 2.1 | 15 | 30 |
| NARS1    | 1:1 |         |         |         |          |     | 11 | 10 |
| AKT2     | 1:1 | 6250.0  | 12500.0 | 800000  | 800000   | 1.8 |    |    |
| S100G    | 1:1 | 97.7    | 195.3   | 25000   | 200000   | 2.1 | 10 | 14 |
| IDO1     | 1:1 | 195.3   | 390.6   | 200000  | 400000   | 2.7 | 14 | 12 |
| PSMD1    | 1:1 |         |         |         |          |     | 15 | 26 |
| C1QTNF6  | 1:1 | 1562.5  | 1562.5  | 200000  | 800000   | 2.1 | 14 | 30 |
| CAMSAP1  | 1:1 | 97.7    | 195.3   | 25000   | 100000   | 2.1 | 11 | 29 |
| DHRS4L2  | 1:1 | 781.3   | 781.3   | 200000  | 800000   | 2.4 | 6  | 11 |
| STX3     | 1:1 | 1562.5  | 1562.5  | 200000  | 800000   | 2.1 | 7  | 5  |
| SYT1     | 1:1 | 195.3   | 195.3   | 50000   | 800000   | 2.4 | 7  | 10 |
| PLEKHO1  | 1:1 | 1562.5  | 6250.0  | 400000  | 800000   | 1.8 | 8  | 16 |
| OPHN1    | 1:1 | 3125.0  | 3125.0  | 200000  | 800000   | 1.8 | 9  | 21 |

|           |     |         |         |         |          |     |    |    |
|-----------|-----|---------|---------|---------|----------|-----|----|----|
| SPTLC1    | 1:1 | 1562.5  | 3125.0  | 800000  | 800000   | 2.4 | 7  | 12 |
| OSBPL2    | 1:1 | 781.3   | 1562.5  | 200000  | 800000   | 2.1 | 5  | 7  |
| USP28     | 1:1 | 195.3   | 390.6   | 100000  | 400000   | 2.4 | 8  | 8  |
| GAST      | 1:1 |         |         |         |          |     | 6  | 30 |
| DLG4      | 1:1 | 195.3   | 390.6   | 25000   | 100000   | 1.8 | 8  | 11 |
| KLRK1     | 1:1 | 48.8    | 97.7    | 25000   | 50000    | 2.4 | 10 | 13 |
| DXO       | 1:1 | 97.7    | 97.7    | 6250    | 25000    | 1.8 | 6  | 16 |
| SEPTIN8   | 1:1 | 195.3   | 390.6   | 200000  | 800000   | 2.7 | 5  | 9  |
| MTHFD2    | 1:1 | 195.3   | 195.3   | 12500   | 50000    | 1.8 | 6  | 15 |
| CCAR2     | 1:1 | 781.3   | 1562.5  | 400000  | 800000   | 2.4 | 9  | 16 |
| CDAN1     | 1:1 | 50000.0 | 50000.0 | 3200000 | 12800000 | 1.8 |    |    |
| TAX1BP1   | 1:1 | 24.4    | 24.4    | 12500   | 25000    | 2.7 | 6  | 11 |
| CDH23     | 1:1 | 1562.5  | 3125.0  | 100000  | 800000   | 1.5 | 8  | 13 |
| MORC3     | 1:1 | 1562.5  | 3125.0  | 800000  | 800000   | 2.4 | 5  | 5  |
| CRYBB2    | 1:1 | 97.7    | 195.3   | 100000  | 400000   | 2.7 | 6  | 14 |
| ALDH5A1   | 1:1 | 3125.0  | 6250.0  | 200000  | 400000   | 1.5 | 11 | 15 |
| FKBP14    | 1:1 | 781.3   | 781.3   | 25000   | 100000   | 1.5 | 9  | 33 |
| SCRIB     | 1:1 | 390.6   | 781.3   | 50000   | 400000   | 1.8 | 10 | 24 |
| EFHD1     | 1:1 | 195.3   | 390.6   | 50000   | 200000   | 2.1 | 9  | 15 |
| DDHD2     | 1:1 | 195.3   | 390.6   | 25000   | 100000   | 1.8 | 7  | 16 |
| BRSK2     | 1:1 | 3125.0  | 3125.0  | 100000  | 400000   | 1.5 | 8  | 21 |
| PCDH12    | 1:1 |         |         |         |          |     | 6  | 8  |
| GFRAL     | 1:1 | 12.2    | 24.4    | 12500   | 50000    | 2.7 | 7  | 17 |
| FNDC1     | 1:1 |         |         |         |          |     | 8  | 17 |
| CAPS      | 1:1 | 48.8    | 48.8    | 12500   | 200000   | 2.4 | 7  | 9  |
| EIF1AX    | 1:1 |         |         |         |          |     | 12 | 25 |
| PRND      | 1:1 | 48.8    | 48.8    | 12500   | 25000    | 2.4 | 3  | 13 |
| PNLIPRP1  | 1:1 |         |         |         |          |     | 9  | 22 |
| PTPRR     | 1:1 | 48.8    | 48.8    | 25000   | 100000   | 2.7 | 6  | 10 |
| TXNDC9    | 1:1 | 6250.0  | 6250.0  | 200000  | 800000   | 1.5 | 5  | 17 |
| TNIP1     | 1:1 | 97.7    | 195.3   | 25000   | 200000   | 2.1 | 4  | 12 |
| PRKAR2A   | 1:1 | 781.3   | 1562.5  | 400000  | 800000   | 2.4 | 4  | 13 |
| CALCB     | 1:1 | 195.3   | 195.3   | 200000  | 800000   | 3.0 | 8  | 10 |
| DNPEP     | 1:1 | 390.6   | 390.6   | 50000   | 400000   | 2.1 | 3  | 19 |
| AP3S2     | 1:1 | 25000.0 | 25000.0 | 3200000 | 12800000 | 2.1 | 7  | 11 |
| CHCHD10   | 1:1 | 195.3   | 195.3   | 6250    | 25000    | 1.5 | 10 | 19 |
| NGRN      | 1:1 | 781.3   | 781.3   | 200000  | 400000   | 2.4 | 6  | 7  |
| PLXDC2    | 1:1 | 781.3   | 781.3   | 50000   | 400000   | 1.8 | 10 | 19 |
| NAPRT     | 1:1 |         |         |         |          |     | 6  | 9  |
| YAP1      | 1:1 | 781.3   | 1562.5  | 50000   | 100000   | 1.5 | 6  | 9  |
| NT5C1A    | 1:1 | 97.7    | 97.7    | 6250    | 25000    | 1.8 | 6  | 11 |
| IMPACT    | 1:1 | 390.6   | 781.3   | 100000  | 400000   | 2.1 | 3  | 11 |
| DOK1      | 1:1 | 6250.0  | 6250.0  | 200000  | 800000   | 1.5 |    |    |
| PLB1      | 1:1 | 97.7    | 97.7    | 12500   | 100000   | 2.1 | 9  | 21 |
| TMPRSS11D | 1:1 | 12.2    | 24.4    | 6250    | 25000    | 2.4 | 8  | 8  |
| LMNB2     | 1:1 | 1562.5  | 1562.5  | 800000  | 800000   | 2.7 | 6  | 13 |
| FGFBP3    | 1:1 | 390.6   | 390.6   | 12500   | 50000    | 1.5 | 7  | 8  |
| DNAJC21   | 1:1 | 390.6   | 390.6   | 25000   | 100000   | 1.8 | 11 | 17 |
| HHEX      | 1:1 | 6.1     | 6.1     | 6250    | 25000    | 3.0 | 7  | 26 |
| BLOC1S3   | 1:1 | 781.3   | 1562.5  | 50000   | 200000   | 1.5 | 7  | 17 |
| HSD17B14  | 1:1 | 390.6   | 781.3   | 200000  | 800000   | 2.4 | 6  | 22 |
| GBP1      | 1:1 | 3125.0  | 3125.0  | 3200000 | 6400000  | 3.0 | 14 | 25 |

|          |     |         |         |         |         |     |    |    |
|----------|-----|---------|---------|---------|---------|-----|----|----|
| WASHC3   | 1:1 | 195.3   | 390.6   | 25000   | 200000  | 1.8 | 5  | 17 |
| VSNL1    | 1:1 | 195.3   | 390.6   | 25000   | 100000  | 1.8 | 7  | 17 |
| PRSS53   | 1:1 | 3.1     | 6.1     | 12500   | 25000   | 3.3 | 7  | 10 |
| CASP7    | 1:1 |         |         |         |         |     | 7  | 19 |
| INSL3    | 1:1 |         |         |         |         |     |    |    |
| KIAA0319 | 1:1 | 195.3   | 195.3   | 25000   | 100000  | 2.1 | 7  | 11 |
| ESYT2    | 1:1 | 6250.0  | 12500.0 | 800000  | 800000  | 1.8 | 9  | 18 |
| MAP2     | 1:1 | 25000.0 | 50000.0 | 1600000 | 6400000 | 1.5 | 5  | 10 |
| C7orf50  | 1:1 |         |         |         |         |     | 5  | 7  |
| HDGFL2   | 1:1 |         |         |         |         |     | 10 | 14 |
| SNRPB2   | 1:1 | 390.6   | 781.3   | 50000   | 400000  | 1.8 | 9  | 13 |
| CLSTN3   | 1:1 | 3125.0  | 6250.0  | 200000  | 800000  | 1.5 | 6  | 15 |
| SPRR3    | 1:1 |         |         |         |         |     | 12 | 18 |
| GSTT2B   | 1:1 | 48.8    | 48.8    | 12500   | 100000  | 2.4 | 5  | 39 |
| PALM2    | 1:1 | 390.6   | 781.3   | 50000   | 400000  | 1.8 | 5  | 9  |
| HIP1R    | 1:1 |         |         |         |         |     | 7  | 10 |
| PLSCR3   | 1:1 | 1562.5  | 1562.5  | 200000  | 800000  | 2.1 | 7  | 16 |
| GCC1     | 1:1 | 97.7    | 195.3   | 50000   | 200000  | 2.4 | 4  | 36 |
| KCTD5    | 1:1 | 97.7    | 195.3   | 50000   | 100000  | 2.4 | 8  | 11 |
| CRYGD    | 1:1 | 3.1     | 24.4    | 3125    | 25000   | 2.1 | 5  | 15 |
| ATXN3    | 1:1 | 1562.5  | 3125.0  | 100000  | 800000  | 1.5 | 6  | 13 |
| BAP18    | 1:1 | 195.3   | 390.6   | 50000   | 200000  | 2.1 | 7  | 22 |
| HEPACAM2 | 1:1 | 390.6   | 390.6   | 50000   | 400000  | 2.1 | 7  | 26 |
| TIMM8A   | 1:1 | 390.6   | 781.3   | 50000   | 100000  | 1.8 | 10 | 27 |
| GIPC2    | 1:1 | 195.3   | 195.3   | 25000   | 100000  | 2.1 | 7  | 8  |
| SMTN     | 1:1 | 1562.5  | 1562.5  | 50000   | 400000  | 1.5 | 5  | 12 |
| BCL2L1   | 1:1 |         |         |         |         |     |    |    |
| PLCB2    | 1:1 | 390.6   | 781.3   | 50000   | 200000  | 1.8 |    |    |
| CTRL     | 1:1 | 97.7    | 97.7    | 12500   | 25000   | 2.1 | 7  | 22 |
| MINK1    | 1:1 |         |         |         |         |     |    |    |
| AK2      | 1:1 |         |         |         |         |     | 11 | 37 |
| SH3GLB2  | 1:1 |         |         |         |         |     | 6  | 16 |
| ACAA1    | 1:1 | 1562.5  | 3125.0  | 400000  | 800000  | 2.1 | 14 | 20 |
| ITGB1BP1 | 1:1 |         |         |         |         |     | 11 | 14 |
| BAMBI    | 1:1 |         |         |         |         |     | 7  | 33 |
| LYAR     | 1:1 |         |         |         |         |     | 9  | 32 |
| VNN2     | 1:1 | 781.3   | 781.3   | 200000  | 800000  | 2.4 | 6  | 10 |
| LRP1     | 1:1 | 12.2    | 24.4    | 12500   | 50000   | 2.7 | 9  | 11 |
| AARSD1   | 1:1 | 48.8    | 195.3   | 200000  | 400000  | 3.0 | 8  | 16 |
| CES3     | 1:1 | 195.3   | 390.6   | 200000  | 400000  | 2.7 | 9  | 53 |
| LHB      | 1:1 | 6250.0  | 12500.0 | 800000  | 1600000 | 1.8 | 10 | 16 |
| CALB1    | 1:1 | 0.8     | 1.5     | 6250    | 25000   | 3.6 | 8  | 13 |
| IGF1R    | 1:1 | 97.7    | 195.3   | 100000  | 800000  | 2.7 | 6  | 12 |
| ABL1     | 1:1 | 12.2    | 24.4    | 50000   | 200000  | 3.3 | 9  | 11 |
| KAZALD1  | 1:1 | 97.7    | 195.3   | 100000  | 200000  | 2.7 | 7  | 11 |
| ERP44    | 1:1 | 97.7    | 195.3   | 100000  | 400000  | 2.7 | 7  | 10 |
| ELOA     | 1:1 | 3.1     | 6.1     | 12500   | 50000   | 3.3 | 7  | 10 |
| GRPEL1   | 1:1 | 12.2    | 24.4    | 50000   | 200000  | 3.3 | 7  | 13 |
| UBAC1    | 1:1 | 48.8    | 195.3   | 25000   | 800000  | 2.1 | 10 | 11 |
| SEMA4C   | 1:1 | 24.4    | 48.8    | 50000   | 800000  | 3.0 | 10 | 8  |
| PODXL    | 1:1 | 97.7    | 195.3   | 12500   | 100000  | 1.8 | 8  | 8  |
| DKKL1    | 1:1 | 48.8    | 97.7    | 50000   | 800000  | 2.7 | 8  | 11 |

|           |     |          |          |         |          |     |    |    |
|-----------|-----|----------|----------|---------|----------|-----|----|----|
| APBB1IP   | 1:1 | 195.3    | 390.6    | 100000  | 400000   | 2.4 | 10 | 10 |
| PRDX6     | 1:1 |          |          |         |          |     | 6  | 15 |
| RBP5      | 1:1 | 97.7     | 195.3    | 12500   | 50000    | 1.8 | 8  | 11 |
| XCL1      | 1:1 |          |          |         |          |     | 4  | 7  |
| FGF21     | 1:1 | 12.2     | 24.4     | 25000   | 200000   | 3.0 | 4  | 5  |
| CBLN4     | 1:1 | 97.7     | 195.3    | 200000  | 800000   | 3.0 | 4  | 27 |
| EBI3_IL27 | 1:1 | 97.7     | 390.6    | 400000  | 800000   | 3.0 | 3  | 8  |
| F3        | 1:1 | 0.8      | 1.5      | 6250    | 25000    | 3.6 | 7  | 4  |
| ITGAV     | 1:1 | 48.8     | 97.7     | 12500   | 100000   | 2.1 | 3  | 4  |
| POLR2F    | 1:1 | 12.2     | 24.4     | 6250    | 12500    | 2.4 | 10 | 11 |
| RILP      | 1:1 | 24.4     | 48.8     | 25000   | 50000    | 2.7 | 5  | 4  |
| METAP2    | 1:1 | 781.3    | 1562.5   | 200000  | 800000   | 2.1 | 4  | 8  |
| CRNN      | 1:1 | 1.5      | 3.1      | 6250    | 12500    | 3.3 | 3  | 4  |
| CASP8     | 1:1 | 0.8      | 1.5      | 6250    | 12500    | 3.6 | 6  | 13 |
| FUS       | 1:1 | 100000.0 | 100000.0 | 6400000 | 12800000 | 1.8 | 8  | 16 |
| BIRC2     | 1:1 | 24.4     | 195.3    | 50000   | 200000   | 2.4 | 11 | 24 |
| BAIAP2    | 1:1 |          |          |         |          |     | 9  | 11 |
| CLEC6A    | 1:1 | 1.5      | 3.1      | 6250    | 12500    | 3.3 | 10 | 18 |
| CCL8      | 1:1 | 0.8      | 1.5      | 1563    | 6250     | 3.0 | 4  | 5  |
| LEFTY2    | 1:1 |          |          |         |          |     | 4  | 10 |
| RTBDN     | 1:1 | 97.7     | 195.3    | 50000   | 200000   | 2.4 | 9  | 14 |
| HBEGF     | 1:1 | 0.8      | 1.5      | 3125    | 12500    | 3.3 | 4  | 4  |
| WIF1      | 1:1 | 48.8     | 48.8     | 25000   | 400000   | 2.7 | 4  | 6  |
| DPP6      | 1:1 | 97.7     | 195.3    | 200000  | 800000   | 3.0 | 9  | 13 |
| SMAD5     | 1:1 | 195.3    | 390.6    | 25000   | 200000   | 1.8 | 8  | 12 |
| SIGLEC6   | 1:1 | 12.2     | 24.4     | 25000   | 200000   | 3.0 | 3  | 5  |
| DSG4      | 1:1 | 12.2     | 24.4     | 6250    | 25000    | 2.4 | 6  | 11 |
| ADM       | 1:1 | 781.3    | 1562.5   | 400000  | 800000   | 2.4 | 4  | 8  |
| PPM1A     | 1:1 | 390.6    | 781.3    | 50000   | 200000   | 1.8 | 8  | 14 |
| MAEA      | 1:1 |          |          |         |          |     | 9  | 42 |
| TNF       | 1:1 | 6.1      | 12.2     | 12500   | 100000   | 3.0 | 7  | 20 |
| RUVBL1    | 1:1 | 781.3    | 3125.0   | 400000  | 800000   | 2.1 | 11 | 15 |
| ARHGAP25  | 1:1 | 195.3    | 390.6    | 100000  | 800000   | 2.4 | 10 | 16 |
| CRH       | 1:1 | 1562.5   | 3125.0   | 400000  | 800000   | 2.1 | 12 | 27 |
| PLXDC1    | 1:1 | 48.8     | 97.7     | 25000   | 200000   | 2.4 | 12 | 14 |
| CRACR2A   | 1:1 | 24.4     | 195.3    | 25000   | 200000   | 2.1 | 11 | 16 |
| CCN4      | 1:1 | 12.2     | 24.4     | 6250    | 25000    | 2.4 | 3  | 4  |
| PRTG      | 1:1 | 6.1      | 12.2     | 6250    | 100000   | 2.7 | 5  | 6  |
| SORD      | 1:1 |          |          |         |          |     | 6  | 11 |
| DDX58     | 1:1 | 1562.5   | 3125.0   | 800000  | 800000   | 2.4 | 8  | 13 |
| EGFL7     | 1:1 |          |          |         |          |     | 11 | 18 |
| GFAP      | 1:1 | 97.7     | 195.3    | 400000  | 800000   | 3.3 | 14 | 23 |
| FCGR2B    | 1:1 |          |          |         |          |     | 12 | 27 |
| GFER      | 1:1 | 781.3    | 1562.5   | 100000  | 800000   | 1.8 | 9  | 17 |
| CDKN2D    | 1:1 |          |          |         |          |     | 8  | 23 |
| AKT3      | 1:1 | 48.8     | 97.7     | 50000   | 200000   | 2.7 | 9  | 24 |
| SCP2      | 1:1 | 24.4     | 195.3    | 100000  | 200000   | 2.7 | 12 | 12 |
| KIR2DL3   | 1:1 | 24.4     | 195.3    | 25000   | 200000   | 2.1 | 9  | 18 |
| RRM2      | 1:1 | 390.6    | 781.3    | 50000   | 400000   | 1.8 | 11 | 20 |
| FEN1      | 1:1 |          |          |         |          |     | 11 | 25 |
| HGS       | 1:1 | 3125.0   | 6250.0   | 800000  | 800000   | 2.1 | 11 | 19 |
| PDGFC     | 1:1 | 195.3    | 781.3    | 100000  | 800000   | 2.1 | 10 | 16 |

|           |     |        |         |         |          |     |    |    |
|-----------|-----|--------|---------|---------|----------|-----|----|----|
| ZBTB16    | 1:1 | 24.4   | 48.8    | 50000   | 200000   | 3.0 | 9  | 18 |
| CCT5      | 1:1 |        |         |         |          |     | 9  | 38 |
| RANGAP1   | 1:1 | 6250.0 | 6250.0  | 1600000 | 12800000 | 2.4 | 10 | 11 |
| PRKRA     | 1:1 | 3125.0 | 6250.0  | 400000  | 800000   | 1.8 | 11 | 15 |
| LYPD8     | 1:1 | 24.4   | 48.8    | 25000   | 200000   | 2.7 | 10 | 16 |
| MAP3K5    | 1:1 | 6250.0 | 6250.0  | 1600000 | 12800000 | 2.4 | 13 | 21 |
| GH2       | 1:1 | 390.6  | 781.3   | 100000  | 200000   | 2.1 | 14 | 19 |
| MZT1      | 1:1 | 48.8   | 195.3   | 50000   | 100000   | 2.4 | 9  | 27 |
| SLAMF6    | 1:1 | 390.6  | 781.3   | 50000   | 800000   | 1.8 | 13 | 13 |
| KIR3DL1   | 1:1 | 6.1    | 12.2    | 50000   | 100000   | 3.6 | 15 | 35 |
| STX6      | 1:1 | 390.6  | 781.3   | 100000  | 800000   | 2.1 | 11 | 13 |
| PQBP1     | 1:1 | 195.3  | 390.6   | 50000   | 200000   | 2.1 | 8  | 22 |
| BTC       | 1:1 | 3.1    | 6.1     | 3125    | 12500    | 2.7 | 10 | 20 |
| SFTPA1    | 1:1 | 3125.0 | 3125.0  | 100000  | 400000   | 1.5 | 10 | 29 |
| VTCN1     | 1:1 | 24.4   | 48.8    | 50000   | 200000   | 3.0 | 11 | 41 |
| NTF4      | 1:1 | 6.1    | 12.2    | 6250    | 200000   | 2.7 | 7  | 26 |
| KLK12     | 1:1 | 24.4   | 48.8    | 12500   | 100000   | 2.4 | 8  | 19 |
| ANKRD54   | 1:1 | 97.7   | 195.3   | 100000  | 200000   | 2.7 | 9  | 15 |
| RAD23B    | 1:1 | 1562.5 | 3125.0  | 400000  | 800000   | 2.1 | 12 | 16 |
| FCRLB     | 1:1 | 97.7   | 195.3   | 50000   | 200000   | 2.4 | 11 | 17 |
| NINJ1     | 1:1 | 97.7   | 195.3   | 100000  | 800000   | 2.7 | 11 | 20 |
| UXS1      | 1:1 | 1562.5 | 3125.0  | 800000  | 800000   | 2.4 | 8  | 22 |
| ADCYAP1R1 | 1:1 | 24.4   | 48.8    | 6250    | 800000   | 2.1 | 8  | 9  |
| ATP6AP2   | 1:1 |        |         |         |          |     | 12 | 14 |
| SMAD1     | 1:1 | 48.8   | 195.3   | 400000  | 800000   | 3.3 | 14 | 24 |
| CEP20     | 1:1 | 24.4   | 48.8    | 100000  | 800000   | 3.3 | 10 | 23 |
| ARHGAP1   | 1:1 | 24.4   | 97.7    | 12500   | 50000    | 2.1 | 8  | 15 |
| RASSF2    | 1:1 | 195.3  | 390.6   | 100000  | 800000   | 2.4 | 10 | 18 |
| PSRC1     | 1:1 |        |         |         |          |     | 9  | 16 |
| CEACAM5   | 1:1 |        |         |         |          |     | 15 | 23 |
| SFTPA2    | 1:1 | 195.3  | 781.3   | 100000  | 200000   | 2.1 | 12 | 15 |
| STX16     | 1:1 |        |         |         |          |     | 10 | 20 |
| RABEPK    | 1:1 | 1562.5 | 3125.0  | 800000  | 6400000  | 2.4 | 10 | 11 |
| SH2B3     | 1:1 | 781.3  | 1562.5  | 100000  | 800000   | 1.8 | 9  | 16 |
| PSMA1     | 1:1 | 6250.0 | 12500.0 | 400000  | 800000   | 1.5 | 15 | 35 |
| RNF41     | 1:1 | 312.5  | 625.0   | 320000  | 640000   | 2.7 | 10 | 11 |
| CA11      | 1:1 | 1562.5 | 3125.0  | 400000  | 800000   | 2.1 | 11 | 18 |
| LTBP3     | 1:1 | 97.7   | 195.3   | 25000   | 100000   | 2.1 | 11 | 27 |
| GSAP      | 1:1 |        |         |         |          |     | 10 | 18 |
| RARRES1   | 1:1 | 97.7   | 781.3   | 100000  | 800000   | 2.1 | 10 | 14 |
| BGN       | 1:1 | 24.4   | 48.8    | 25000   | 100000   | 2.7 | 14 | 21 |
| RRM2B     | 1:1 |        |         |         |          |     | 12 | 28 |
| PDP1      | 1:1 |        |         |         |          |     | 8  | 16 |
| MAGED1    | 1:1 | 3.1    | 3.1     | 1563    | 12500    | 2.7 | 9  | 54 |
| CAMKK1    | 1:1 | 97.7   | 195.3   | 25000   | 200000   | 2.1 | 11 | 21 |
| MAVS      | 1:1 | 390.6  | 781.3   | 100000  | 800000   | 2.1 | 10 | 13 |
| FES       | 1:1 | 6250.0 | 12500.0 | 400000  | 800000   | 1.5 | 5  |    |
| LSM1      | 1:1 | 48.8   | 195.3   | 25000   | 100000   | 2.1 | 9  | 43 |
| NAMPT     | 1:1 | 3125.0 | 3125.0  | 800000  | 1600000  | 2.4 | 13 | 16 |
| NDUFS6    | 1:1 | 48.8   | 97.7    | 25000   | 100000   | 2.4 | 11 | 20 |
| TBL1X     | 1:1 | 24.4   | 48.8    | 12500   | 100000   | 2.4 | 11 | 19 |
| FLI1      | 1:1 | 1.5    | 3.1     | 1563    | 3125     | 2.7 | 7  | 37 |

|          |     |          |          |          |          |     |    |    |
|----------|-----|----------|----------|----------|----------|-----|----|----|
| IKZF2    | 1:1 | 6.1      | 6.1      | 6250     | 25000    | 3.0 | 8  | 21 |
| FMR1     | 1:1 | 97.7     | 97.7     | 200000   | 800000   | 3.3 | 8  | 18 |
| TP53     | 1:1 | 781.3    | 1562.5   | 400000   | 800000   | 2.4 | 10 | 23 |
| CHAC2    | 1:1 | 97.7     | 195.3    | 50000    | 200000   | 2.4 | 7  | 19 |
| TACC3    | 1:1 | 24.4     | 195.3    | 25000    | 800000   | 2.1 | 8  | 25 |
| MPI      | 1:1 | 195.3    | 390.6    | 200000   | 800000   | 2.7 | 9  | 12 |
| ATG4A    | 1:1 | 1562.5   | 3125.0   | 800000   | 800000   | 2.4 | 8  | 15 |
| SORCS2   | 1:1 | 1562.5   | 1562.5   | 200000   | 800000   | 2.1 | 10 | 24 |
| AKR1B1   | 1:1 | 1562.5   | 1562.5   | 400000   | 800000   | 2.4 | 11 | 18 |
| FLT3     | 1:1 | 48.8     | 97.7     | 25000    | 100000   | 2.4 | 10 | 11 |
| HS3ST3B1 | 1:1 | 390.6    | 781.3    | 400000   | 800000   | 2.7 | 8  | 12 |
| ADAMTS15 | 1:1 | 195.3    | 781.3    | 200000   | 800000   | 2.4 | 9  | 14 |
| CDHR2    | 1:1 | 3125.0   | 6250.0   | 800000   | 800000   | 2.1 | 7  | 12 |
| IL6      | 1:1 | 0.8      | 1.5      | 3125     | 12500    | 3.3 | 9  | 8  |
| LPCAT2   | 1:1 |          |          |          |          |     | 8  | 15 |
| AIF1     | 1:1 |          |          |          |          |     | 11 | 20 |
| CEACAM3  | 1:1 |          |          |          |          |     | 16 | 31 |
| GNE      | 1:1 | 781.3    | 1562.5   | 400000   | 800000   | 2.4 | 8  | 11 |
| ENTPD2   | 1:1 | 6.1      | 12.2     | 6250     | 25000    | 2.7 | 9  | 27 |
| KRT18    | 1:1 | 6.1      | 12.2     | 12500    | 100000   | 3.0 | 7  | 11 |
| AGR3     | 1:1 | 50000.0  | 50000.0  | 6400000  | 12800000 | 2.1 | 11 | 13 |
| SUGT1    | 1:1 |          |          |          |          |     | 11 | 23 |
| SLAMF8   | 1:1 | 6.1      | 48.8     | 6250     | 25000    | 2.1 | 10 | 18 |
| TPMT     | 1:1 | 48.8     | 195.3    | 50000    | 200000   | 2.4 | 10 | 14 |
| FOXO3    | 1:1 | 1562.5   | 6250.0   | 200000   | 400000   | 1.5 | 13 | 13 |
| RP2      | 1:1 | 3125.0   | 6250.0   | 400000   | 800000   | 1.8 | 8  | 10 |
| PSMD9    | 1:1 | 48.8     | 195.3    | 100000   | 400000   | 2.7 | 9  | 9  |
| LAT2     | 1:1 | 781.3    | 1562.5   | 400000   | 800000   | 2.4 | 7  | 16 |
| VPS53    | 1:1 | 97.7     | 195.3    | 50000    | 200000   | 2.4 | 8  | 9  |
| CD207    | 1:1 | 48.8     | 48.8     | 50000    | 400000   | 3.0 | 10 | 13 |
| SERPINA9 | 1:1 | 6.1      | 12.2     | 50000    | 200000   | 3.6 | 7  | 16 |
| SF3B4    | 1:1 | 97.7     | 195.3    | 25000    | 100000   | 2.1 | 9  | 14 |
| COX5B    | 1:1 | 97.7     | 195.3    | 50000    | 100000   | 2.4 | 5  | 14 |
| STAT5B   | 1:1 | 24.4     | 48.8     | 200000   | 400000   | 3.6 | 14 | 20 |
| CFC1     | 1:1 | 97.7     | 195.3    | 100000   | 200000   | 2.7 | 10 | 29 |
| DPEP2    | 1:1 | 97.7     | 390.6    | 50000    | 400000   | 2.1 | 10 | 11 |
| MME      | 1:1 | 24.4     | 48.8     | 25000    | 100000   | 2.7 | 9  | 9  |
| TBC1D23  | 1:1 | 48.8     | 97.7     | 12500    | 25000    | 2.1 | 10 | 26 |
| FLT1     | 1:1 | 781.3    | 1562.5   | 200000   | 400000   | 2.1 | 8  | 9  |
| CD28     | 1:1 | 195.3    | 390.6    | 100000   | 800000   | 2.4 | 11 | 15 |
| GSTA3    | 1:1 | 24.4     | 48.8     | 25000    | 100000   | 2.7 | 10 | 13 |
| MED18    | 1:1 |          |          |          |          |     | 10 | 14 |
| STXBP3   | 1:1 |          |          |          |          |     | 8  | 24 |
| GFOD2    | 1:1 | 100000.0 | 400000.0 | 12800000 | 12800000 | 1.5 | 8  | 16 |
| CEP85    | 1:1 | 87.9     | 175.8    | 45000    | 180000   | 2.4 | 9  | 31 |
| NFKBIE   | 1:1 | 24.4     | 48.8     | 25000    | 200000   | 2.7 | 10 | 15 |
| PDCD1LG2 | 1:1 | 24.4     | 97.7     | 6250     | 400000   | 1.8 | 9  | 12 |
| DDAH1    | 1:1 | 97.7     | 390.6    | 100000   | 800000   | 2.4 | 11 | 11 |
| SEPTIN9  | 1:1 |          |          |          |          |     | 7  | 9  |
| CDC27    | 1:1 | 6.1      | 12.2     | 50000    | 200000   | 3.6 | 10 | 29 |
| NPTN     | 1:1 | 390.6    | 781.3    | 50000    | 200000   | 1.8 | 12 | 15 |
| AIFM1    | 1:1 | 97.7     | 195.3    | 25000    | 800000   | 2.1 | 11 | 8  |



|             |     |        |        |        |        |     |    |    |
|-------------|-----|--------|--------|--------|--------|-----|----|----|
| SEZ6L2      | 1:1 | 48.8   | 195.3  | 100000 | 400000 | 2.7 | 7  | 7  |
| IGSF3       | 1:1 | 6.1    | 12.2   | 25000  | 200000 | 3.3 | 8  | 6  |
| PPME1       | 1:1 | 390.6  | 781.3  | 400000 | 800000 | 2.7 | 9  | 17 |
| YES1        | 1:1 | 24.4   | 48.8   | 12500  | 50000  | 2.4 | 11 | 16 |
| ARSB        | 1:1 | 48.8   | 195.3  | 100000 | 800000 | 2.7 | 8  | 12 |
| ST3GAL1     | 1:1 | 3125.0 | 6250.0 | 800000 | 800000 | 2.1 | 9  | 8  |
| DRG2        | 1:1 | 3125.0 | 6250.0 | 800000 | 800000 | 2.1 | 7  | 12 |
| CD302       | 1:1 | 195.3  | 390.6  | 25000  | 800000 | 1.8 | 10 | 9  |
| STX4        | 1:1 | 195.3  | 390.6  | 100000 | 800000 | 2.4 | 9  | 10 |
| ERBIN       | 1:1 | 97.7   | 195.3  | 12500  | 25000  | 1.8 | 7  | 13 |
| INPPL1      | 1:1 | 97.7   | 195.3  | 50000  | 100000 | 2.4 | 6  | 19 |
| OMG         | 1:1 | 6.1    | 12.2   | 12500  | 25000  | 3.0 | 12 | 12 |
| CD38        | 1:1 | 6.1    | 12.2   | 6250   | 25000  | 2.7 | 7  | 14 |
| CTSV        | 1:1 | 24.4   | 48.8   | 6250   | 12500  | 2.1 | 4  | 6  |
| TAFA5       | 1:1 | 48.8   | 97.7   | 6250   | 25000  | 1.8 | 9  | 14 |
| CPE         | 1:1 | 97.7   | 97.7   | 50000  | 800000 | 2.7 | 5  | 4  |
| HPGDS       | 1:1 | 781.3  | 1562.5 | 400000 | 800000 | 2.4 | 10 | 12 |
| KIFBP       | 1:1 | 390.6  | 781.3  | 400000 | 800000 | 2.7 | 11 | 19 |
| DTX3        | 1:1 | 97.7   | 195.3  | 400000 | 800000 | 3.3 | 10 | 9  |
| PFKFB2      | 1:1 | 97.7   | 195.3  | 400000 | 800000 | 3.3 | 8  | 13 |
| OPTC        | 1:1 | 12.2   | 24.4   | 25000  | 100000 | 3.0 | 10 | 12 |
| USO1        | 1:1 | 195.3  | 390.6  | 100000 | 400000 | 2.4 | 11 | 23 |
| RET         | 1:1 | 24.4   | 48.8   | 25000  | 400000 | 2.7 | 8  | 10 |
| LRRC25      | 1:1 | 6.1    | 24.4   | 12500  | 50000  | 2.7 | 9  | 11 |
| VPS37A      | 1:1 |        |        |        |        |     | 8  | 10 |
| AREG        | 1:1 | 1.5    | 3.1    | 6250   | 25000  | 3.3 | 8  | 10 |
| LAG3        | 1:1 |        |        |        |        |     | 10 | 8  |
| GALNT7      | 1:1 | 781.3  | 781.3  | 50000  | 800000 | 1.8 | 9  | 9  |
| CCN1        | 1:1 | 48.8   | 97.7   | 25000  | 200000 | 2.4 | 9  | 9  |
| ICOSLG      | 1:1 | 48.8   | 97.7   | 12500  | 800000 | 2.1 | 9  | 13 |
| IQGAP2      | 1:1 |        |        |        |        |     | 10 | 17 |
| CES2        | 1:1 |        |        |        |        |     | 10 | 13 |
| FAM3B       | 1:1 | 97.7   | 195.3  | 12500  | 800000 | 1.8 | 6  | 10 |
| ITGB7       | 1:1 | 12.2   | 48.8   | 50000  | 200000 | 3.0 | 4  | 6  |
| KLK13       | 1:1 | 24.4   | 48.8   | 6250   | 50000  | 2.1 | 8  | 11 |
| INPP1       | 1:1 | 1562.5 | 3125.0 | 400000 | 800000 | 2.1 | 11 | 29 |
| CA12        | 1:1 | 24.4   | 48.8   | 12500  | 100000 | 2.4 | 9  | 11 |
| SRP14       | 1:1 | 390.6  | 781.3  | 50000  | 800000 | 1.8 | 9  | 11 |
| CDKN1A      | 1:1 | 390.6  | 781.3  | 400000 | 800000 | 2.7 | 9  | 12 |
| DCTN2       | 1:1 |        |        |        |        |     | 11 | 9  |
| SCAMP3      | 1:1 | 195.3  | 195.3  | 50000  | 400000 | 2.4 | 10 | 9  |
| LYN         | 1:1 | 6.1    | 24.4   | 3125   | 6250   | 2.1 | 10 | 11 |
| OGFR        | 1:1 | 48.8   | 97.7   | 200000 | 800000 | 3.3 | 10 | 10 |
| GCG         | 1:1 |        |        |        |        |     | 15 | 31 |
| NUDT2       | 1:1 | 97.7   | 195.3  | 12500  | 800000 | 1.8 | 8  | 13 |
| ADGRG1      | 1:1 | 195.3  | 390.6  | 100000 | 400000 | 2.4 | 7  | 14 |
| CNPY4       | 1:1 | 97.7   | 195.3  | 12500  | 800000 | 1.8 | 10 | 7  |
| CDNF        | 1:1 | 12.2   | 12.2   | 12500  | 50000  | 3.0 | 9  | 10 |
| EPHA2       | 1:1 | 12.2   | 24.4   | 25000  | 200000 | 3.0 | 7  | 9  |
| ATP6V1D     | 1:1 |        |        |        |        |     | 2  | 8  |
| GFRA2       | 1:1 |        |        |        |        |     | 9  | 9  |
| IL12A_IL12B | 1:1 | 24.4   | 48.8   | 12500  | 100000 | 2.4 | 8  | 12 |

|               |     |         |         |         |         |     |    |    |
|---------------|-----|---------|---------|---------|---------|-----|----|----|
| GPA33         | 1:1 | 6.1     | 12.2    | 6250    | 12500   | 2.7 | 9  | 10 |
| VAT1          | 1:1 |         |         |         |         |     | 9  | 12 |
| FGF23         | 1:1 | 97.7    | 195.3   | 50000   | 200000  | 2.4 | 5  | 6  |
| SLITRK2       | 1:1 | 24.4    | 48.8    | 200000  | 800000  | 3.6 | 4  | 6  |
| TMPRSS15      | 1:1 | 48.8    | 195.3   | 25000   | 100000  | 2.1 | 9  | 9  |
| KLK14         | 1:1 |         |         |         |         |     | 7  | 5  |
| TRIAP1        | 1:1 | 48.8    | 97.7    | 25000   | 100000  | 2.4 | 4  | 3  |
| CA14          | 1:1 | 6.1     | 12.2    | 50000   | 400000  | 3.6 | 4  | 4  |
| GALNT10       | 1:1 | 781.3   | 1562.5  | 400000  | 800000  | 2.4 | 11 | 15 |
| DPY30         | 1:1 | 48.8    | 97.7    | 6250    | 25000   | 1.8 | 5  | 4  |
| MSLN          | 1:1 |         |         |         |         |     | 9  | 9  |
| PDCD1         | 1:1 | 3.1     | 6.1     | 12500   | 25000   | 3.3 | 4  | 10 |
| HAO1          | 1:1 | 97.7    | 195.3   | 400000  | 800000  | 3.3 | 4  | 7  |
| ALPP          | 1:1 | 3.1     | 6.1     | 12500   | 50000   | 3.3 | 8  | 11 |
| DNAJB1        | 1:1 | 3125.0  | 6250.0  | 800000  | 1600000 | 2.1 | 8  | 15 |
| MUC16         | 1:1 |         |         |         |         |     | 14 | 22 |
| CXCL8         | 1:1 | 0.2     | 0.4     | 1563    | 12500   | 3.6 | 5  | 4  |
| ANGPTL7       | 1:1 | 48.8    | 97.7    | 25000   | 800000  | 2.4 | 3  | 5  |
| MMP12         | 1:1 | 3.1     | 6.1     | 12500   | 100000  | 3.3 | 5  | 5  |
| HBQ1          | 1:1 |         |         |         |         |     | 4  | 9  |
| SCG2          | 1:1 | 97.7    | 195.3   | 200000  | 400000  | 3.0 | 4  | 5  |
| RBP2          | 1:1 | 48.8    | 195.3   | 12500   | 25000   | 1.8 | 8  | 8  |
| LTA4H         | 1:1 | 12500.0 | 25000.0 | 1600000 | 3200000 | 1.8 | 4  | 19 |
| EDA2R         | 1:1 | 0.4     | 0.8     | 3125    | 12500   | 3.6 | 4  | 5  |
| ARG1          | 1:1 | 390.6   | 781.3   | 50000   | 200000  | 1.8 | 4  | 8  |
| SMOC1         | 1:1 | 781.3   | 1562.5  | 200000  | 800000  | 2.1 | 4  | 7  |
| GCNT1         | 1:1 | 781.3   | 781.3   | 400000  | 800000  | 2.7 | 10 | 9  |
| HSPB6         | 1:1 | 48.8    | 97.7    | 25000   | 400000  | 2.4 | 3  | 6  |
| DCTN1         | 1:1 | 195.3   | 781.3   | 400000  | 800000  | 2.7 | 4  | 9  |
| SIGLEC9       | 1:1 | 12.2    | 24.4    | 6250    | 25000   | 2.4 | 5  | 3  |
| NPY           | 1:1 | 1562.5  | 3125.0  | 800000  | 800000  | 2.4 | 6  | 12 |
| CLMP          | 1:1 | 24.4    | 48.8    | 12500   | 400000  | 2.4 | 3  | 8  |
| LGALS7_LGALS7 | 1:1 | 25000.0 | 25000.0 | 800000  | 1600000 | 1.5 | 6  | 13 |
| SPINK6        | 1:1 | 12.2    | 24.4    | 12500   | 100000  | 2.7 | 3  | 5  |
| CAPG          | 1:1 | 781.3   | 781.3   | 400000  | 800000  | 2.7 | 3  | 8  |
| FXN           | 1:1 | 3125.0  | 6250.0  | 800000  | 800000  | 2.1 | 4  | 5  |
| SIRT2         | 1:1 | 24.4    | 48.8    | 50000   | 100000  | 3.0 | 10 | 12 |
| S100A12       | 1:1 | 781.3   | 1562.5  | 400000  | 800000  | 2.4 | 9  | 17 |
| AMIGO2        | 1:1 | 48.8    | 195.3   | 12500   | 50000   | 1.8 | 9  | 7  |
| DAB2          | 1:1 | 195.3   | 390.6   | 50000   | 200000  | 2.1 | 4  | 12 |
| RSPO3         | 1:1 | 24.4    | 48.8    | 50000   | 200000  | 3.0 | 3  | 6  |
| CD5           | 1:1 | 0.8     | 1.5     | 3125    | 12500   | 3.3 | 5  | 6  |
| NUCB2         | 1:1 | 97.7    | 195.3   | 12500   | 400000  | 1.8 | 4  | 5  |
| TNFRSF19      | 1:1 | 3.1     | 6.1     | 3125    | 12500   | 2.7 | 4  | 5  |
| EPS8L2        | 1:1 | 97.7    | 195.3   | 100000  | 400000  | 2.7 | 4  | 4  |
| DEFB4A_DEFB4B | 1:1 |         |         |         |         |     | 12 | 12 |
| KLK4          | 1:1 | 0.2     | 0.4     | 6250    | 25000   | 4.2 | 4  | 5  |
| CALCOCO1      | 1:1 | 195.3   | 390.6   | 100000  | 400000  | 2.4 | 5  | 7  |
| MOG           | 1:1 | 1.5     | 3.1     | 1563    | 3125    | 2.7 | 3  | 7  |
| HMBS          | 1:1 | 390.6   | 781.3   | 200000  | 800000  | 2.4 | 5  | 8  |
| VMO1          | 1:1 | 1562.5  | 3125.0  | 200000  | 800000  | 1.8 | 13 | 11 |
| LRIG1         | 1:1 | 48.8    | 97.7    | 100000  | 800000  | 3.0 | 4  | 5  |

|          |      |        |         |          |          |     |   |    |
|----------|------|--------|---------|----------|----------|-----|---|----|
| CA9      | 1:1  | 6.1    | 6.1     | 6250     | 50000    | 3.0 | 4 | 6  |
| TACSTD2  | 1:1  | 1.5    | 3.1     | 6250     | 25000    | 3.3 | 5 | 5  |
| HS6ST1   | 1:1  | 390.6  | 781.3   | 200000   | 400000   | 2.4 | 8 | 8  |
| ACP6     | 1:1  | 12.2   | 24.4    | 50000    | 400000   | 3.3 | 5 | 5  |
| SCLY     | 1:1  | 97.7   | 195.3   | 100000   | 800000   | 2.7 | 3 | 5  |
| CRISP2   | 1:1  | 6.1    | 12.2    | 12500    | 200000   | 3.0 | 4 | 6  |
| APEX1    | 1:1  | 6.1    | 12.2    | 6250     | 200000   | 2.7 | 3 | 5  |
| CNTN2    | 1:1  | 24.4   | 48.8    | 12500    | 50000    | 2.4 | 4 | 5  |
| RTN4R    | 1:1  | 48.8   | 97.7    | 200000   | 800000   | 3.3 | 4 | 7  |
| NCS1     | 1:1  | 12.2   | 24.4    | 25000    | 400000   | 3.0 | 4 | 5  |
| GALNT2   | 1:1  | 195.3  | 390.6   | 50000    | 400000   | 2.1 | 3 | 6  |
| WFDC12   | 1:1  | 48.8   | 48.8    | 6250     | 12500    | 2.1 | 4 | 16 |
| VWA1     | 1:1  | 48.8   | 195.3   | 400000   | 800000   | 3.3 | 4 | 4  |
| HDGF     | 1:1  | 24.4   | 24.4    | 6250     | 25000    | 2.4 | 5 | 10 |
| HAGH     | 1:1  | 781.3  | 781.3   | 200000   | 800000   | 2.4 | 6 | 14 |
| CD300LF  | 1:1  | 12.2   | 48.8    | 12500    | 25000    | 2.4 | 6 | 6  |
| AMBP     | 1:1  | 1562.5 | 12500.0 | 12800000 | 12800000 | 3.0 | 5 | 6  |
| CPVL     | 1:1  | 97.7   | 390.6   | 200000   | 800000   | 2.7 | 4 | 7  |
| CD300E   | 1:1  | 390.6  | 781.3   | 400000   | 800000   | 2.7 | 3 | 4  |
| GPC1     | 1:1  | 195.3  | 390.6   | 100000   | 400000   | 2.4 | 3 | 3  |
| GFRA1    | 1:1  | 24.4   | 48.8    | 50000    | 200000   | 3.0 | 3 | 4  |
| IDUA     | 1:1  | 12.2   | 24.4    | 3125     | 12500    | 2.1 | 4 | 9  |
| DSG3     | 1:1  | 3.1    | 6.1     | 6250     | 50000    | 3.0 | 6 | 5  |
| HAVCR1   | 1:1  | 3.1    | 6.1     | 12500    | 50000    | 3.3 | 3 | 4  |
| PVALB    | 1:1  | 12.2   | 12.2    | 6250     | 25000    | 2.7 | 9 | 9  |
| ANGPT2   | 1:1  | 195.3  | 390.6   | 200000   | 800000   | 2.7 | 5 | 6  |
| CD1C     | 1:10 | 97.7   | 195.3   | 25000    | 400000   | 2.1 | 8 | 12 |
| WFDC2    | 1:10 | 12.2   | 24.4    | 25000    | 400000   | 3.0 | 7 | 6  |
| XPNPEP2  | 1:10 | 12.2   | 48.8    | 50000    | 200000   | 3.0 | 6 | 6  |
| CTSF     | 1:10 | 97.7   | 195.3   | 50000    | 400000   | 2.4 | 7 | 8  |
| P4HB     | 1:10 | 24.4   | 24.4    | 12500    | 50000    | 2.7 | 8 | 13 |
| CIAPIN1  | 1:10 | 195.3  | 390.6   | 200000   | 400000   | 2.7 | 6 | 8  |
| FOLR3    | 1:10 | 0.2    | 0.4     | 12500    | 50000    | 4.5 | 6 | 10 |
| TJAP1    | 1:10 | 195.3  | 390.6   | 400000   | 800000   | 3.0 | 6 | 6  |
| PPP1R12A | 1:10 | 97.7   | 195.3   | 25000    | 100000   | 2.1 | 9 | 22 |
| TGFBR2   | 1:10 | 1.5    | 3.1     | 12500    | 25000    | 3.6 | 7 | 7  |
| ERBB4    | 1:10 | 3.1    | 6.1     | 12500    | 50000    | 3.3 | 7 | 4  |
| NELL1    | 1:10 | 48.8   | 97.7    | 200000   | 800000   | 3.3 | 7 | 7  |
| NECTIN4  | 1:10 | 1.5    | 3.1     | 3125     | 12500    | 3.0 | 7 | 6  |
| TXNDC15  | 1:10 | 48.8   | 97.7    | 25000    | 400000   | 2.4 | 8 | 10 |
| MANSC1   | 1:10 | 48.8   | 97.7    | 50000    | 400000   | 2.7 | 6 | 9  |
| MDK      | 1:10 |        |         |          |          |     | 8 | 14 |
| SEZ6L    | 1:10 | 195.3  | 390.6   | 100000   | 400000   | 2.4 | 7 | 7  |
| CDC37    | 1:10 | 390.6  | 781.3   | 100000   | 400000   | 2.1 | 8 | 23 |
| PODXL2   | 1:10 | 48.8   | 97.7    | 25000    | 100000   | 2.4 | 8 | 13 |
| C4BPB    | 1:10 | 6.1    | 12.2    | 12500    | 100000   | 3.0 | 8 | 6  |
| NBL1     | 1:10 | 24.4   | 48.8    | 12500    | 25000    | 2.4 | 7 | 8  |
| FLT4     | 1:10 | 781.3  | 1562.5  | 400000   | 800000   | 2.4 | 7 | 5  |
| CD33     | 1:10 | 12.2   | 48.8    | 12500    | 50000    | 2.4 | 7 | 9  |
| CPXM1    | 1:10 | 195.3  | 390.6   | 200000   | 400000   | 2.7 | 8 | 10 |
| KDR      | 1:10 | 3.1    | 6.1     | 25000    | 50000    | 3.6 | 6 | 10 |
| TEK      | 1:10 | 48.8   | 97.7    | 100000   | 400000   | 3.0 | 7 | 9  |

|           |      |          |          |         |          |     |    |    |
|-----------|------|----------|----------|---------|----------|-----|----|----|
| NT5E      | 1:10 | 6.1      | 12.2     | 25000   | 100000   | 3.3 | 7  | 8  |
| SNAP29    | 1:10 | 48.8     | 97.7     | 100000  | 400000   | 3.0 | 12 | 13 |
| SPARC     | 1:10 | 195.3    | 390.6    | 200000  | 800000   | 2.7 | 8  | 10 |
| ADAMTS8   | 1:10 | 48.8     | 97.7     | 50000   | 200000   | 2.7 | 7  | 8  |
| L1CAM     | 1:10 | 97.7     | 195.3    | 100000  | 400000   | 2.7 | 6  | 8  |
| HTRA2     | 1:10 | 12.2     | 24.4     | 12500   | 25000    | 2.7 | 10 | 10 |
| DCXR      | 1:10 | 195.3    | 390.6    | 100000  | 800000   | 2.4 | 5  | 8  |
| SIAE      | 1:10 | 195.3    | 390.6    | 50000   | 400000   | 2.1 | 6  | 5  |
| PLA2G15   | 1:10 | 24.4     | 48.8     | 50000   | 400000   | 3.0 | 7  | 6  |
| FGFR2     | 1:10 | 12.2     | 24.4     | 25000   | 400000   | 3.0 | 6  | 6  |
| FGFBP1    | 1:10 |          |          |         |          |     | 7  | 8  |
| TNFRSF12A | 1:10 | 97.7     | 195.3    | 200000  | 800000   | 3.0 | 9  | 11 |
| ATOX1     | 1:10 | 48.8     | 97.7     | 12500   | 800000   | 2.1 | 9  | 15 |
| DCBLD2    | 1:10 | 6.1      | 12.2     | 12500   | 50000    | 3.0 | 8  | 7  |
| IL13RA1   | 1:10 | 24.4     | 48.8     | 12500   | 25000    | 2.4 | 6  | 9  |
| PPY       | 1:10 | 97.7     | 97.7     | 12500   | 50000    | 2.1 | 7  | 12 |
| CEACAM1   | 1:10 | 6.1      | 12.2     | 25000   | 400000   | 3.3 | 8  | 8  |
| S100A4    | 1:10 |          |          |         |          |     | 8  | 12 |
| CREG1     | 1:10 | 97.7     | 195.3    | 25000   | 400000   | 2.1 | 6  | 12 |
| FURIN     | 1:10 | 48.8     | 97.7     | 50000   | 100000   | 2.7 | 7  | 7  |
| TFPI2     | 1:10 | 0.8      | 1.5      | 6250    | 12500    | 3.6 | 7  | 8  |
| ITGB5     | 1:10 | 97.7     | 195.3    | 100000  | 400000   | 2.7 | 8  | 14 |
| FOLR1     | 1:10 | 0.8      | 1.5      | 3125    | 12500    | 3.3 | 8  | 9  |
| KLK8      | 1:10 | 3.1      | 6.1      | 6250    | 25000    | 3.0 | 7  | 11 |
| MSRA      | 1:10 | 0.8      | 1.5      | 391     | 1563     | 2.4 | 7  | 9  |
| CD27      | 1:10 | 24.4     | 48.8     | 25000   | 100000   | 2.7 | 7  | 8  |
| KLK1      | 1:10 | 1.5      | 3.1      | 6250    | 25000    | 3.3 | 7  | 8  |
| SRC       | 1:10 | 24.4     | 48.8     | 12500   | 25000    | 2.4 | 7  | 14 |
| KLK10     | 1:10 | 24.4     | 48.8     | 25000   | 50000    | 2.7 | 8  | 25 |
| LYPD3     | 1:10 | 6.1      | 12.2     | 6250    | 25000    | 2.7 | 6  | 15 |
| DLL1      | 1:10 | 6.1      | 12.2     | 50000   | 100000   | 3.6 | 7  | 9  |
| VEGFC     | 1:10 | 97.7     | 97.7     | 12500   | 400000   | 2.1 | 11 | 13 |
| ERBB2     | 1:10 | 1.5      | 3.1      | 12500   | 50000    | 3.6 | 7  | 8  |
| MIA       | 1:10 | 31.7     | 63.5     | 65000   | 130000   | 3.0 | 6  | 6  |
| KLK11     | 1:10 | 48.8     | 97.7     | 25000   | 100000   | 2.4 | 7  | 40 |
| KLK6      | 1:10 | 1.5      | 12.2     | 3125    | 12500    | 2.4 | 7  | 5  |
| GAGE2A    | 1:1  | 97.7     | 195.3    | 12500   | 400000   | 1.8 | 10 | 4  |
| CLASP1    | 1:1  |          |          |         |          |     |    |    |
| LYZL2     | 1:1  | 6.1      | 12.2     | 1563    | 25000    | 2.1 | 9  | 23 |
| MAPRE3    | 1:1  |          |          |         |          |     | 2  | 3  |
| SLC28A1   | 1:1  |          |          |         |          |     | 5  | 11 |
| GATA3     | 1:1  | 100000.0 | 200000.0 | 6400000 | 12800000 | 1.5 |    |    |
| MANEAL    | 1:1  |          |          |         |          |     | 16 | 28 |
| KIR3DL2   | 1:1  | 390.6    | 781.3    | 100000  | 400000   | 2.1 | 8  | 19 |
| MYH7B     | 1:1  | 390.6    | 781.3    | 50000   | 400000   | 1.8 | 15 | 4  |
| CDC25A    | 1:1  | 390.6    | 781.3    | 50000   | 100000   | 1.8 | 6  |    |
| UNC79     | 1:1  | 781.3    | 781.3    | 100000  | 400000   | 2.1 | 14 | 20 |
| PDE1C     | 1:1  |          |          |         |          |     | 9  | 21 |
| PCNA      | 1:1  | 6250.0   | 6250.0   | 400000  | 3200000  | 1.8 | 3  |    |
| DTNB      | 1:1  | 97.7     | 97.7     | 12500   | 50000    | 2.1 | 12 | 13 |
| LAMTOR5   | 1:1  |          |          |         |          |     | 9  | 13 |
| TSPAN8    | 1:1  | 3.1      | 12.2     | 6250    | 25000    | 2.7 | 4  | 25 |

|         |     |         |         |         |         |     |     |    |
|---------|-----|---------|---------|---------|---------|-----|-----|----|
| OGA     | 1:1 | 1562.5  | 3125.0  | 200000  | 800000  | 1.8 | 8   | 15 |
| ADAM9   | 1:1 | 25000.0 | 25000.0 | 1600000 | 3200000 | 1.8 | 9   | 19 |
| CD101   | 1:1 | 390.6   | 781.3   | 200000  | 800000  | 2.4 | 6   | 15 |
| CDC26   | 1:1 | 1562.5  | 1562.5  | 50000   | 800000  | 1.5 | 6   | 40 |
| DDX1    | 1:1 |         |         |         |         |     | 9   | 15 |
| PALM    | 1:1 | 195.3   | 195.3   | 12500   | 50000   | 1.8 | 6   | 6  |
| GPR15L  | 1:1 |         |         |         |         |     | 10  | 18 |
| NFU1    | 1:1 | 48.8    | 97.7    | 100000  | 400000  | 3.0 |     |    |
| PBK     | 1:1 | 97.7    | 195.3   | 100000  | 400000  | 2.7 | 8   | 8  |
| GIMAP8  | 1:1 | 195.3   | 390.6   | 25000   | 200000  | 1.8 | 16  | 21 |
| HMMR    | 1:1 | 3125.0  | 6250.0  | 800000  | 800000  | 2.1 | 9   | 13 |
| CLINT1  | 1:1 | 6250.0  | 12500.0 | 800000  | 800000  | 1.8 | 9   | 21 |
| SLIRP   | 1:1 |         |         |         |         |     | 12  | 22 |
| BEX3    | 1:1 | 195.3   | 390.6   | 25000   | 100000  | 1.8 |     |    |
| PHLDB2  | 1:1 |         |         |         |         |     | 13  | 21 |
| NMRK2   | 1:1 |         |         |         |         |     |     |    |
| ANKRA2  | 1:1 |         |         |         |         |     |     |    |
| CREB3   | 1:1 | 195.3   | 390.6   | 25000   | 800000  | 1.8 | 12  | 7  |
| GJA8    | 1:1 | 3125.0  | 3125.0  | 200000  | 800000  | 1.8 |     |    |
| SMC3    | 1:1 |         |         |         |         |     | 9   |    |
| MAPK13  | 1:1 | 6250.0  | 6250.0  | 800000  | 800000  | 2.1 | 0.2 |    |
| CDK1    | 1:1 |         |         |         |         |     | 15  | 8  |
| JMJD1C  | 1:1 | 1562.5  | 3125.0  | 200000  | 800000  | 1.8 | 4   | 14 |
| CYB5A   | 1:1 | 195.3   | 390.6   | 50000   | 400000  | 2.1 | 11  | 18 |
| SLC34A3 | 1:1 | 1562.5  | 3125.0  | 200000  | 800000  | 1.8 | 11  |    |
| CPLX2   | 1:1 | 781.3   | 1562.5  | 100000  | 400000  | 1.8 |     |    |
| SPRING1 | 1:1 |         |         |         |         |     | 13  | 19 |
| PRAME   | 1:1 |         |         |         |         |     | 5   |    |
| MUCL3   | 1:1 | 390.6   | 390.6   | 25000   | 100000  | 1.8 | 10  | 18 |
| STOML2  | 1:1 |         |         |         |         |     | 11  | 8  |
| ZP4     | 1:1 | 24.4    | 97.7    | 12500   | 50000   | 2.1 | 1   |    |
| IGLON5  | 1:1 | 781.3   | 1562.5  | 200000  | 800000  | 2.1 | 8   | 14 |
| BTNL10  | 1:1 | 3125.0  | 3125.0  | 200000  | 800000  | 1.8 |     |    |
| GAD1    | 1:1 | 6250.0  | 12500.0 | 800000  | 800000  | 1.8 |     |    |
| PDCL2   | 1:1 | 195.3   | 390.6   | 50000   | 200000  | 2.1 | 11  | 8  |
| BSND    | 1:1 | 195.3   | 390.6   | 25000   | 200000  | 1.8 |     |    |
| ATF4    | 1:1 | 48.8    | 48.8    | 6250    | 400000  | 2.1 | 12  |    |
| VWA5A   | 1:1 | 781.3   | 1562.5  | 100000  | 400000  | 1.8 | 10  | 17 |
| DNAJA1  | 1:1 |         |         |         |         |     | 0.3 |    |
| FGF9    | 1:1 |         |         |         |         |     | 1   |    |
| IZUMO1  | 1:1 | 97.7    | 195.3   | 200000  | 800000  | 3.0 |     |    |
| ARHGAP5 | 1:1 |         |         |         |         |     | 9   | 14 |
| TRIM26  | 1:1 |         |         |         |         |     |     |    |
| MORF4L2 | 1:1 | 781.3   | 781.3   | 50000   | 400000  | 1.8 | 11  | 11 |
| VCPKMT  | 1:1 |         |         |         |         |     | 8   | 23 |
| ESPL1   | 1:1 | 390.6   | 781.3   | 50000   | 400000  | 1.8 | 11  | 18 |
| PSMC3   | 1:1 |         |         |         |         |     |     |    |
| CREBZF  | 1:1 | 6250.0  | 6250.0  | 800000  | 800000  | 2.1 |     |    |
| CYTH3   | 1:1 | 781.3   | 781.3   | 50000   | 400000  | 1.8 |     |    |
| IL25    | 1:1 | 195.3   | 390.6   | 100000  | 400000  | 2.4 | 4   |    |
| KHDC3L  | 1:1 |         |         |         |         |     | 12  | 21 |
| BCL7A   | 1:1 | 781.3   | 781.3   | 50000   | 800000  | 1.8 |     |    |

|           |     |        |         |        |         |     |    |    |
|-----------|-----|--------|---------|--------|---------|-----|----|----|
| TMOD4     | 1:1 | 1562.5 | 3125.0  | 200000 | 800000  | 1.8 | 7  |    |
| CDC123    | 1:1 | 1562.5 | 1562.5  | 100000 | 800000  | 1.8 | 16 |    |
| MORN4     | 1:1 | 390.6  | 390.6   | 100000 | 400000  | 2.4 | 10 | 20 |
| SSH3      | 1:1 | 6250.0 | 12500.0 | 800000 | 3200000 | 1.8 | 9  | 3  |
| REST      | 1:1 |        |         |        |         |     | 8  | 28 |
| CEP152    | 1:1 | 97.7   | 195.3   | 25000  | 50000   | 2.1 | 16 | 36 |
| PITHD1    | 1:1 | 1562.5 | 1562.5  | 100000 | 400000  | 1.8 | 7  | 20 |
| NEK7      | 1:1 | 6250.0 | 6250.0  | 800000 | 800000  | 2.1 | 9  | 15 |
| CEACAM18  | 1:1 | 195.3  | 390.6   | 50000  | 200000  | 2.1 | 10 | 12 |
| EPN1      | 1:1 |        |         |        |         |     | 11 | 20 |
| CEP350    | 1:1 |        |         |        |         |     | 18 |    |
| FOS       | 1:1 | 48.8   | 97.7    | 50000  | 200000  | 2.7 |    |    |
| FGF7      | 1:1 | 195.3  | 195.3   | 12500  | 800000  | 1.8 | 14 | 13 |
| SHC1      | 1:1 |        |         |        |         |     |    |    |
| IL3       | 1:1 | 195.3  | 781.3   | 200000 | 800000  | 2.4 |    |    |
| EVI2B     | 1:1 | 781.3  | 1562.5  | 100000 | 400000  | 1.8 | 8  | 16 |
| PDXDC1    | 1:1 | 3125.0 | 3125.0  | 200000 | 400000  | 1.8 |    |    |
| ATP1B4    | 1:1 |        |         |        |         |     | 14 | 12 |
| DCUN1D2   | 1:1 | 1562.5 | 1562.5  | 100000 | 800000  | 1.8 | 2  |    |
| TAGLN3    | 1:1 |        |         |        |         |     | 15 |    |
| H2AP      | 1:1 | 97.7   | 195.3   | 25000  | 50000   | 2.1 |    |    |
| TOP1MT    | 1:1 | 3125.0 | 6250.0  | 400000 | 800000  | 1.8 | 9  | 10 |
| TPRKB     | 1:1 | 3125.0 | 6250.0  | 400000 | 3200000 | 1.8 | 11 |    |
| GRSF1     | 1:1 | 390.6  | 781.3   | 50000  | 100000  | 1.8 | 16 | 21 |
| DCDC2C    | 1:1 | 48.8   | 97.7    | 25000  | 100000  | 2.4 |    |    |
| RBM25     | 1:1 | 3125.0 | 3125.0  | 200000 | 800000  | 1.8 | 4  |    |
| BTLA      | 1:1 | 195.3  | 195.3   | 12500  | 50000   | 1.8 | 18 | 33 |
| THAP12    | 1:1 | 48.8   | 97.7    | 25000  | 100000  | 2.4 | 14 | 26 |
| MRPL52    | 1:1 |        |         |        |         |     | 8  |    |
| ERCC1     | 1:1 | 781.3  | 3125.0  | 200000 | 800000  | 1.8 |    |    |
| DCLRE1C   | 1:1 |        |         |        |         |     | 12 |    |
| PDIA2     | 1:1 | 781.3  | 1562.5  | 200000 | 800000  | 2.1 | 13 | 18 |
| GABARAPL1 | 1:1 |        |         |        |         |     |    |    |
| PAIP2B    | 1:1 |        |         |        |         |     | 19 | 18 |
| RASGRF1   | 1:1 | 97.7   | 195.3   | 25000  | 50000   | 2.1 |    |    |
| PFDN4     | 1:1 |        |         |        |         |     | 14 | 22 |
| RAD51     | 1:1 | 24.4   | 97.7    | 50000  | 200000  | 2.7 | 7  |    |
| MORF4L1   | 1:1 |        |         |        |         |     |    |    |
| PDIA5     | 1:1 |        |         |        |         |     | 14 | 31 |
| CD82      | 1:1 | 195.3  | 390.6   | 25000  | 50000   | 1.8 | 13 | 15 |
| MLLT1     | 1:1 | 781.3  | 781.3   | 100000 | 800000  | 2.1 | 21 |    |
| STAU1     | 1:1 |        |         |        |         |     | 9  | 17 |
| COL9A2    | 1:1 | 3125.0 | 6250.0  | 400000 | 800000  | 1.8 | 12 | 25 |
| PPIE      | 1:1 | 1562.5 | 3125.0  | 400000 | 800000  | 2.1 | 14 | 6  |
| NFKB2     | 1:1 | 195.3  | 390.6   | 25000  | 200000  | 1.8 |    |    |
| SHPK      | 1:1 | 1562.5 | 3125.0  | 200000 | 800000  | 1.8 | 12 | 11 |
| TXK       | 1:1 | 6250.0 | 12500.0 | 800000 | 800000  | 1.8 | 8  | 25 |
| RNF43     | 1:1 | 390.6  | 781.3   | 100000 | 400000  | 2.1 | 12 | 18 |
| TLR2      | 1:1 | 195.3  | 390.6   | 100000 | 400000  | 2.4 | 16 | 30 |
| HRAS      | 1:1 | 97.7   | 195.3   | 25000  | 50000   | 2.1 | 6  | 9  |
| TAP1      | 1:1 |        |         |        |         |     | 10 | 3  |
| CEP290    | 1:1 | 390.6  | 781.3   | 50000  | 100000  | 1.8 | 12 | 10 |

|          |     |         |         |        |          |     |    |    |
|----------|-----|---------|---------|--------|----------|-----|----|----|
| PAFAH2   | 1:1 | 3125.0  | 6250.0  | 400000 | 800000   | 1.8 | 14 | 17 |
| GTF2IRD1 | 1:1 | 781.3   | 1562.5  | 100000 | 400000   | 1.8 | 8  | 13 |
| GAS2     | 1:1 | 1562.5  | 1562.5  | 200000 | 800000   | 2.1 | 10 | 15 |
| ID4      | 1:1 | 390.6   | 781.3   | 100000 | 200000   | 2.1 | 8  | 14 |
| IFIT3    | 1:1 | 781.3   | 781.3   | 100000 | 200000   | 2.1 | 8  | 14 |
| SLK      | 1:1 |         |         |        |          |     | 14 | 17 |
| MAPKAPK2 | 1:1 | 1562.5  | 1562.5  | 200000 | 800000   | 2.1 | 13 | 16 |
| UPK3BL1  | 1:1 | 195.3   | 390.6   | 25000  | 50000    | 1.8 | 9  | 16 |
| CA7      | 1:1 | 1562.5  | 3125.0  | 400000 | 800000   | 2.1 |    |    |
| TMED1    | 1:1 | 12500.0 | 25000.0 | 800000 | 6400000  | 1.5 | 20 |    |
| ACADM    | 1:1 |         |         |        |          |     | 14 | 27 |
| CASP4    | 1:1 | 97.7    | 195.3   | 200000 | 400000   | 3.0 | 10 | 24 |
| TET2     | 1:1 | 195.3   | 390.6   | 25000  | 50000    | 1.8 | 12 | 12 |
| ALMS1    | 1:1 | 390.6   | 390.6   | 25000  | 50000    | 1.8 | 14 | 34 |
| TPPP2    | 1:1 |         |         |        |          |     | 12 | 9  |
| TCP11    | 1:1 | 1562.5  | 1562.5  | 200000 | 800000   | 2.1 | 8  |    |
| VPS28    | 1:1 | 3125.0  | 6250.0  | 400000 | 800000   | 1.8 | 12 | 18 |
| VSTM2B   | 1:1 |         |         |        |          |     | 5  | 21 |
| OFD1     | 1:1 |         |         |        |          |     | 7  | 11 |
| TRIM24   | 1:1 | 195.3   | 390.6   | 50000  | 100000   | 2.1 | 14 | 21 |
| LSM8     | 1:1 | 6250.0  | 12500.0 | 800000 | 12800000 | 1.8 | 8  | 9  |
| TEX33    | 1:1 |         |         |        |          |     |    |    |
| TK1      | 1:1 |         |         |        |          |     | 10 | 3  |
| SEPTIN7  | 1:1 |         |         |        |          |     | 14 | 21 |
| OGT      | 1:1 | 12500.0 | 25000.0 | 800000 | 800000   | 1.5 | 3  | 11 |
| KIAA1549 | 1:1 |         |         |        |          |     | 20 | 14 |
| SAT2     | 1:1 | 97.7    | 97.7    | 25000  | 50000    | 2.4 | 13 | 17 |
| MTHFSD   | 1:1 |         |         |        |          |     | 15 | 34 |
| PPP1R12B | 1:1 | 781.3   | 781.3   | 50000  | 200000   | 1.8 | 17 | 20 |
| ZNF75D   | 1:1 | 1562.5  | 3125.0  | 200000 | 800000   | 1.8 | 6  | 17 |
| BRD1     | 1:1 | 1562.5  | 1562.5  | 100000 | 800000   | 1.8 | 13 |    |
| CD3E     | 1:1 | 97.7    | 195.3   | 100000 | 800000   | 2.7 | 15 |    |
| PARD3    | 1:1 |         |         |        |          |     | 12 |    |
| FUT1     | 1:1 | 3125.0  | 3125.0  | 200000 | 800000   | 1.8 | 11 | 14 |
| ARAF     | 1:1 | 1562.5  | 1562.5  | 100000 | 800000   | 1.8 | 12 | 7  |
| CTAG1A   | 1:1 | 48.8    | 97.7    | 25000  | 50000    | 2.4 | 17 |    |
| PRUNE2   | 1:1 | 195.3   | 390.6   | 50000  | 200000   | 2.1 | 14 | 17 |
| SPRR1B   | 1:1 |         |         |        |          |     | 11 | 18 |
| RGL2     | 1:1 | 390.6   | 390.6   | 25000  | 50000    | 1.8 | 13 | 33 |
| IL9      | 1:1 | 48.8    | 97.7    | 12500  | 50000    | 2.1 | 11 | 12 |
| GADD45B  | 1:1 | 3125.0  | 3125.0  | 200000 | 3200000  | 1.8 | 9  | 16 |
| CEACAM20 | 1:1 | 48.8    | 97.7    | 25000  | 100000   | 2.4 | 11 | 16 |
| SAP18    | 1:1 | 195.3   | 390.6   | 100000 | 400000   | 2.4 | 14 | 28 |
| EFCAB2   | 1:1 |         |         |        |          |     | 13 | 13 |
| RAPGEF2  | 1:1 |         |         |        |          |     | 15 | 8  |
| DYNC1H1  | 1:1 | 195.3   | 390.6   | 100000 | 400000   | 2.4 | 6  | 11 |
| GUCY2C   | 1:1 | 390.6   | 390.6   | 50000  | 200000   | 2.1 | 14 |    |
| LRRFIP1  | 1:1 |         |         |        |          |     | 11 | 21 |
| ARHGAP30 | 1:1 | 3125.0  | 3125.0  | 200000 | 800000   | 1.8 | 16 |    |
| SERPINH1 | 1:1 | 6250.0  | 6250.0  | 400000 | 800000   | 1.8 |    |    |
| ZNF830   | 1:1 | 6250.0  | 6250.0  | 200000 | 800000   | 1.5 | 7  | 6  |
| NENF     | 1:1 | 1562.5  | 3125.0  | 200000 | 800000   | 1.8 | 8  | 20 |

|           |     |          |          |         |          |     |    |    |
|-----------|-----|----------|----------|---------|----------|-----|----|----|
| MTUS1     | 1:1 | 12.2     | 24.4     | 6250    | 50000    | 2.4 | 20 | 15 |
| MAGEA3    | 1:1 | 781.3    | 1562.5   | 100000  | 800000   | 1.8 |    |    |
| RNF4      | 1:1 |          |          |         |          |     |    |    |
| AMOTL2    | 1:1 | 1562.5   | 3125.0   | 400000  | 800000   | 2.1 | 9  | 10 |
| TIGIT     | 1:1 | 97.7     | 195.3    | 12500   | 200000   | 1.8 | 15 | 18 |
| TRDMT1    | 1:1 | 97.7     | 195.3    | 100000  | 200000   | 2.7 | 14 | 26 |
| CCND2     | 1:1 | 1562.5   | 3125.0   | 400000  | 800000   | 2.1 | 11 | 14 |
| TARS1     | 1:1 | 3125.0   | 6250.0   | 800000  | 800000   | 2.1 | 7  | 19 |
| CDH22     | 1:1 | 12500.0  | 12500.0  | 800000  | 3200000  | 1.8 | 10 | 36 |
| ERI1      | 1:1 |          |          |         |          |     | 11 | 35 |
| S100A3    | 1:1 | 97.7     | 195.3    | 25000   | 50000    | 2.1 | 9  | 25 |
| TAB2      | 1:1 | 3125.0   | 6250.0   | 400000  | 800000   | 1.8 | 14 | 22 |
| COL4A4    | 1:1 |          |          |         |          |     | 19 |    |
| MAMDC4    | 1:1 | 48.8     | 97.7     | 25000   | 50000    | 2.4 | 6  | 18 |
| SMAD2     | 1:1 | 25000.0  | 50000.0  | 3200000 | 12800000 | 1.8 | 8  | 13 |
| TNPO1     | 1:1 |          |          |         |          |     | 12 | 9  |
| KIAA1549L | 1:1 | 1562.5   | 1562.5   | 100000  | 200000   | 1.8 |    |    |
| CENPJ     | 1:1 | 195.3    | 195.3    | 25000   | 50000    | 2.1 |    |    |
| ENSA      | 1:1 | 12500.0  | 12500.0  | 800000  | 1600000  | 1.8 | 12 | 25 |
| ZNRF4     | 1:1 | 781.3    | 781.3    | 100000  | 200000   | 2.1 | 7  | 23 |
| MNAT1     | 1:1 | 390.6    | 781.3    | 200000  | 800000   | 2.4 | 7  | 8  |
| DHPS      | 1:1 | 781.3    | 781.3    | 25000   | 200000   | 1.5 | 13 | 20 |
| EVPL      | 1:1 | 390.6    | 390.6    | 100000  | 200000   | 2.4 | 14 | 14 |
| ARG2      | 1:1 | 100000.0 | 100000.0 | 6400000 | 12800000 | 1.8 | 9  | 14 |
| FAM171B   | 1:1 | 195.3    | 390.6    | 100000  | 400000   | 2.4 | 9  | 8  |
| GPRC5C    | 1:1 | 781.3    | 1562.5   | 400000  | 800000   | 2.4 | 11 | 20 |
| IFIT1     | 1:1 |          |          |         |          |     |    |    |
| PTTG1     | 1:1 | 390.6    | 781.3    | 100000  | 800000   | 2.1 | 14 | 6  |
| RAB44     | 1:1 | 1562.5   | 3125.0   | 200000  | 800000   | 1.8 | 12 | 19 |
| CINP      | 1:1 | 6250.0   | 12500.0  | 1600000 | 6400000  | 2.1 | 8  | 19 |
| PRC1      | 1:1 | 1562.5   | 3125.0   | 200000  | 800000   | 1.8 | 15 | 15 |
| RCC1      | 1:1 | 390.6    | 781.3    | 50000   | 200000   | 1.8 | 8  | 12 |
| ITGAX     | 1:1 | 1562.5   | 1562.5   | 100000  | 800000   | 1.8 | 9  | 37 |
| SH3GL3    | 1:1 | 6250.0   | 6250.0   | 400000  | 800000   | 1.8 |    |    |
| RPE       | 1:1 |          |          |         |          |     | 12 | 18 |
| CENPF     | 1:1 | 390.6    | 390.6    | 50000   | 200000   | 2.1 | 13 | 26 |
| PKN3      | 1:1 | 1562.5   | 1562.5   | 200000  | 800000   | 2.1 | 17 | 12 |
| AP1G2     | 1:1 | 12.2     | 48.8     | 25000   | 200000   | 2.7 | 8  | 15 |
| ENOPH1    | 1:1 |          |          |         |          |     | 9  | 18 |
| GPD1      | 1:1 | 3125.0   | 3125.0   | 200000  | 800000   | 1.8 | 8  | 25 |
| WDR46     | 1:1 | 200000.0 | 200000.0 | 6400000 | 12800000 | 1.5 | 9  | 9  |
| COMMD9    | 1:1 | 195.3    | 390.6    | 50000   | 200000   | 2.1 | 11 | 18 |
| INSL4     | 1:1 | 97.7     | 195.3    | 25000   | 100000   | 2.1 | 14 | 17 |
| ERN1      | 1:1 | 195.3    | 390.6    | 100000  | 200000   | 2.4 | 9  | 13 |
| KIAA2013  | 1:1 | 12500.0  | 12500.0  | 800000  | 800000   | 1.8 |    |    |
| NDST1     | 1:1 | 195.3    | 390.6    | 50000   | 200000   | 2.1 | 9  | 14 |
| VSIG2     | 1:1 | 195.3    | 195.3    | 6250    | 50000    | 1.5 | 11 | 13 |
| DUSP13    | 1:1 | 781.3    | 781.3    | 50000   | 400000   | 1.8 | 10 | 29 |
| LACRT     | 1:1 | 6250.0   | 6250.0   | 400000  | 3200000  | 1.8 | 10 | 25 |
| WFDC1     | 1:1 |          |          |         |          |     | 11 | 12 |
| IMMT      | 1:1 | 781.3    | 781.3    | 50000   | 800000   | 1.8 | 13 | 11 |
| EDDM3B    | 1:1 | 24.4     | 48.8     | 3125    | 12500    | 1.8 | 11 | 33 |



|          |     |         |         |        |         |     |    |    |
|----------|-----|---------|---------|--------|---------|-----|----|----|
| UBE2B    | 1:1 |         |         |        |         |     | 7  | 11 |
| SUSD4    | 1:1 | 48.8    | 48.8    | 25000  | 100000  | 2.7 | 14 | 13 |
| SLC13A1  | 1:1 |         |         |        |         |     | 9  | 12 |
| SMPDL3B  | 1:1 | 12500.0 | 12500.0 | 800000 | 3200000 | 1.8 | 9  | 16 |
| FNTA     | 1:1 | 24.4    | 48.8    | 12500  | 50000   | 2.4 | 9  | 16 |
| ALDH2    | 1:1 | 781.3   | 1562.5  | 100000 | 400000  | 1.8 | 5  | 27 |
| RALY     | 1:1 | 781.3   | 781.3   | 100000 | 800000  | 2.1 | 11 | 13 |
| AHSA1    | 1:1 |         |         |        |         |     | 11 | 9  |
| NMI      | 1:1 | 195.3   | 390.6   | 200000 | 800000  | 2.7 | 12 | 22 |
| LTB      | 1:1 | 390.6   | 390.6   | 50000  | 200000  | 2.1 | 9  | 18 |
| LARP1    | 1:1 | 781.3   | 1562.5  | 200000 | 800000  | 2.1 | 13 | 21 |
| PCDHB15  | 1:1 | 1562.5  | 3125.0  | 200000 | 800000  | 1.8 | 8  | 16 |
| RFC4     | 1:1 | 781.3   | 1562.5  | 200000 | 800000  | 2.1 | 7  | 9  |
| ACRBP    | 1:1 | 195.3   | 390.6   | 25000  | 100000  | 1.8 | 12 | 12 |
| THTPA    | 1:1 | 195.3   | 390.6   | 25000  | 200000  | 1.8 | 7  | 25 |
| SNX2     | 1:1 |         |         |        |         |     | 8  | 17 |
| VPS4B    | 1:1 | 781.3   | 1562.5  | 100000 | 800000  | 1.8 | 7  | 32 |
| EPGN     | 1:1 | 195.3   | 390.6   | 25000  | 100000  | 1.8 | 2  | 8  |
| CAPN3    | 1:1 | 195.3   | 390.6   | 100000 | 800000  | 2.4 | 12 | 21 |
| MINDY1   | 1:1 |         |         |        |         |     |    |    |
| NACC1    | 1:1 | 781.3   | 781.3   | 50000  | 200000  | 1.8 | 12 | 12 |
| LUZP2    | 1:1 | 195.3   | 390.6   | 25000  | 800000  | 1.8 | 11 | 10 |
| RAB2B    | 1:1 | 3125.0  | 3125.0  | 200000 | 800000  | 1.8 | 12 | 21 |
| TDP1     | 1:1 | 195.3   | 390.6   | 25000  | 200000  | 1.8 | 19 | 36 |
| PXDNL    | 1:1 | 781.3   | 781.3   | 50000  | 400000  | 1.8 | 12 | 21 |
| GLYR1    | 1:1 |         |         |        |         |     | 10 | 17 |
| REG3G    | 1:1 |         |         |        |         |     | 18 | 13 |
| TG       | 1:1 | 6.1     | 12.2    | 3125   | 12500   | 2.4 | 8  | 16 |
| IL22     | 1:1 | 12.2    | 24.4    | 6250   | 25000   | 2.4 | 13 | 15 |
| VSIG10   | 1:1 | 195.3   | 390.6   | 100000 | 400000  | 2.4 | 11 | 14 |
| BTN1A1   | 1:1 | 3.1     | 6.1     | 3125   | 25000   | 2.7 | 13 | 14 |
| IL2RG    | 1:1 | 390.6   | 781.3   | 50000  | 800000  | 1.8 | 12 | 13 |
| CMIP     | 1:1 | 6250.0  | 12500.0 | 800000 | 3200000 | 1.8 | 8  | 16 |
| YJU2     | 1:1 | 781.3   | 781.3   | 50000  | 200000  | 1.8 | 12 | 13 |
| PPP1CC   | 1:1 | 1562.5  | 3125.0  | 200000 | 800000  | 1.8 | 6  | 20 |
| SCRIB    | 1:1 | 195.3   | 390.6   | 50000  | 800000  | 2.1 | 6  | 20 |
| LMOD1    | 1:1 |         |         |        |         |     | 14 | 24 |
| MTSS2    | 1:1 |         |         |        |         |     | 14 | 32 |
| CEACAM19 | 1:1 | 48.8    | 97.7    | 6250   | 50000   | 1.8 | 17 | 23 |
| GABARAP  | 1:1 | 1562.5  | 1562.5  | 100000 | 400000  | 1.8 | 11 | 23 |
| EIF2AK2  | 1:1 |         |         |        |         |     | 6  | 17 |
| SLMAP    | 1:1 | 97.7    | 195.3   | 12500  | 50000   | 1.8 | 7  | 21 |
| LRRC37A2 | 1:1 | 781.3   | 1562.5  | 100000 | 400000  | 1.8 | 5  | 19 |
| SH3BP1   | 1:1 | 1562.5  | 3125.0  | 200000 | 800000  | 1.8 | 6  | 29 |
| TADA3    | 1:1 |         |         |        |         |     | 13 | 21 |
| GORASP2  | 1:1 | 6250.0  | 6250.0  | 400000 | 1600000 | 1.8 | 7  | 25 |
| GPHA2    | 1:1 | 97.7    | 97.7    | 6250   | 50000   | 1.8 | 5  | 7  |
| TGFB2    | 1:1 | 12500.0 | 12500.0 | 400000 | 1600000 | 1.5 | 15 | 23 |
| SDHB     | 1:1 | 781.3   | 1562.5  | 200000 | 800000  | 2.1 | 7  | 35 |
| PBXIP1   | 1:1 |         |         |        |         |     | 11 | 9  |
| DNAJB14  | 1:1 | 48.8    | 97.7    | 25000  | 100000  | 2.4 | 8  | 13 |
| PTPRH    | 1:1 | 12.2    | 48.8    | 25000  | 200000  | 2.7 | 7  | 16 |

|          |     |         |         |        |         |     |    |    |
|----------|-----|---------|---------|--------|---------|-----|----|----|
| SMAD3    | 1:1 | 12500.0 | 12500.0 | 800000 | 800000  | 1.8 | 13 | 17 |
| KIR2DS4  | 1:1 | 48.8    | 97.7    | 12500  | 200000  | 2.1 | 7  | 17 |
| KIR2DL2  | 1:1 | 97.7    | 97.7    | 6250   | 50000   | 1.8 | 15 | 27 |
| ITIH5    | 1:1 | 781.3   | 1562.5  | 100000 | 400000  | 1.8 | 17 | 37 |
| TRIM58   | 1:1 | 390.6   | 390.6   | 25000  | 200000  | 1.8 | 7  | 11 |
| USP25    | 1:1 | 97.7    | 195.3   | 12500  | 50000   | 1.8 | 7  | 14 |
| UNG      | 1:1 |         |         |        |         |     | 12 | 28 |
| KLK15    | 1:1 | 97.7    | 97.7    | 12500  | 100000  | 2.1 | 13 | 20 |
| CHCHD6   | 1:1 | 781.3   | 781.3   | 100000 | 400000  | 2.1 | 9  | 10 |
| STAM     | 1:1 |         |         |        |         |     | 10 | 14 |
| HSPA2    | 1:1 | 195.3   | 781.3   | 50000  | 200000  | 1.8 | 11 | 13 |
| MPRIIP   | 1:1 |         |         |        |         |     | 15 | 18 |
| SDCCAG8  | 1:1 | 6.1     | 24.4    | 12500  | 50000   | 2.7 | 10 | 19 |
| CCDC134  | 1:1 | 1562.5  | 3125.0  | 200000 | 800000  | 1.8 | 16 | 10 |
| MCTS1    | 1:1 |         |         |        |         |     | 4  | 8  |
| DYNLT3   | 1:1 |         |         |        |         |     | 14 | 28 |
| SLC9A3R2 | 1:1 |         |         |        |         |     | 9  | 20 |
| DNM1     | 1:1 | 1562.5  | 3125.0  | 200000 | 800000  | 1.8 | 6  | 40 |
| DUT      | 1:1 | 1562.5  | 3125.0  | 400000 | 800000  | 2.1 | 13 | 29 |
| PCDH7    | 1:1 | 3125.0  | 3125.0  | 200000 | 800000  | 1.8 | 5  | 12 |
| PCSK7    | 1:1 | 1562.5  | 3125.0  | 200000 | 800000  | 1.8 | 18 | 22 |
| BCL2     | 1:1 | 195.3   | 195.3   | 50000  | 200000  | 2.4 | 11 | 19 |
| SSNA1    | 1:1 |         |         |        |         |     | 6  | 18 |
| ZFYVE19  | 1:1 | 1562.5  | 3125.0  | 400000 | 800000  | 2.1 | 5  | 29 |
| ATRAID   | 1:1 | 48.8    | 48.8    | 12500  | 50000   | 2.4 | 7  | 9  |
| ZNRD2    | 1:1 | 1562.5  | 3125.0  | 200000 | 800000  | 1.8 | 6  | 13 |
| TOP1     | 1:1 |         |         |        |         |     | 6  | 21 |
| TMEM106A | 1:1 | 97.7    | 97.7    | 12500  | 50000   | 2.1 | 8  | 33 |
| BCL7B    | 1:1 | 390.6   | 781.3   | 50000  | 800000  | 1.8 | 14 |    |
| INSL5    | 1:1 | 97.7    | 97.7    | 12500  | 50000   | 2.1 |    |    |
| TNFAIP2  | 1:1 | 48.8    | 48.8    | 12500  | 50000   | 2.4 | 5  | 7  |
| NUBP1    | 1:1 |         |         |        |         |     | 5  |    |
| HDDC2    | 1:1 | 195.3   | 390.6   | 50000  | 800000  | 2.1 | 6  | 8  |
| IDO1     | 1:1 | 195.3   | 390.6   | 100000 | 400000  | 2.4 | 7  | 14 |
| MEP1A    | 1:1 | 195.3   | 195.3   | 50000  | 800000  | 2.4 | 5  | 17 |
| CWC15    | 1:1 | 195.3   | 781.3   | 50000  | 200000  | 1.8 | 6  | 17 |
| AP3B1    | 1:1 | 195.3   | 781.3   | 50000  | 800000  | 1.8 | 7  | 26 |
| C9orf40  | 1:1 | 195.3   | 390.6   | 25000  | 200000  | 1.8 | 5  | 19 |
| SMNDC1   | 1:1 |         |         |        |         |     | 8  | 14 |
| NCR3LG1  | 1:1 | 195.3   | 390.6   | 100000 | 400000  | 2.4 | 6  | 12 |
| SWAP70   | 1:1 | 781.3   | 781.3   | 50000  | 800000  | 1.8 | 6  | 8  |
| CIRBP    | 1:1 |         |         |        |         |     | 7  | 37 |
| IFNAR1   | 1:1 | 195.3   | 195.3   | 25000  | 800000  | 2.1 | 5  | 7  |
| ATG16L1  | 1:1 | 781.3   | 1562.5  | 200000 | 800000  | 2.1 | 5  | 10 |
| SNX18    | 1:1 | 12500.0 | 12500.0 | 800000 | 1600000 | 1.8 | 6  | 11 |
| PPP2R5A  | 1:1 |         |         |        |         |     |    |    |
| PHLDB1   | 1:1 |         |         |        |         |     | 21 | 22 |
| MTSS1    | 1:1 |         |         |        |         |     |    |    |
| LMNB1    | 1:1 |         |         |        |         |     | 17 | 16 |
| MAP2K1   | 1:1 | 195.3   | 390.6   | 200000 | 800000  | 2.7 | 4  | 28 |
| NAP1L4   | 1:1 | 1562.5  | 1562.5  | 100000 | 800000  | 1.8 | 4  | 12 |
| PSCA     | 1:1 |         |         |        |         |     | 5  | 8  |

|          |     |         |         |         |         |     |    |    |
|----------|-----|---------|---------|---------|---------|-----|----|----|
| PSAPL1   | 1:1 | 12.2    | 97.7    | 6250    | 25000   | 1.8 | 5  | 12 |
| YARS1    | 1:1 |         |         |         |         |     |    |    |
| CEACAM16 | 1:1 | 12.2    | 24.4    | 6250    | 50000   | 2.4 | 5  | 8  |
| CD86     | 1:1 | 97.7    | 97.7    | 12500   | 200000  | 2.1 | 6  | 7  |
| DNAJC9   | 1:1 |         |         |         |         |     | 7  | 14 |
| GPIHBP1  | 1:1 |         |         |         |         |     | 23 | 25 |
| EGFLAM   | 1:1 | 781.3   | 1562.5  | 200000  | 800000  | 2.1 | 7  | 6  |
| FKBPL    | 1:1 | 195.3   | 390.6   | 100000  | 400000  | 2.4 | 8  | 20 |
| ENDOU    | 1:1 | 97.7    | 195.3   | 25000   | 50000   | 2.1 | 7  | 11 |
| SERPINI2 | 1:1 | 195.3   | 390.6   | 25000   | 200000  | 1.8 | 6  | 14 |
| ADGRE1   | 1:1 | 1562.5  | 1562.5  | 100000  | 800000  | 1.8 | 8  | 10 |
| NUDT16   | 1:1 |         |         |         |         |     | 5  | 31 |
| CDC42BPB | 1:1 |         |         |         |         |     | 6  | 14 |
| EFCAB14  | 1:1 | 25000.0 | 25000.0 | 1600000 | 3200000 | 1.8 | 7  | 6  |
| GIPC3    | 1:1 | 195.3   | 390.6   | 25000   | 200000  | 1.8 | 7  | 36 |
| PTPRK    | 1:1 | 3125.0  | 6250.0  | 800000  | 3200000 | 2.1 | 7  | 12 |
| TRIM25   | 1:1 | 781.3   | 781.3   | 50000   | 200000  | 1.8 | 6  | 16 |
| IFI30    | 1:1 |         |         |         |         |     | 5  | 11 |
| KAZN     | 1:1 | 781.3   | 1562.5  | 400000  | 800000  | 2.4 | 5  | 23 |
| UFD1     | 1:1 | 781.3   | 781.3   | 200000  | 400000  | 2.4 |    |    |
| TMED8    | 1:1 | 97.7    | 195.3   | 25000   | 200000  | 2.1 | 5  | 32 |
| BRAP     | 1:1 | 48.8    | 97.7    | 25000   | 800000  | 2.4 | 5  | 27 |
| OTUD6B   | 1:1 |         |         |         |         |     | 7  | 26 |
| IST1     | 1:1 |         |         |         |         |     |    |    |
| FAM13A   | 1:1 | 97.7    | 390.6   | 25000   | 200000  | 1.8 | 6  | 25 |
| COL24A1  | 1:1 |         |         |         |         |     | 24 | 30 |
| SPINT3   | 1:1 | 24.4    | 24.4    | 6250    | 25000   | 2.4 |    |    |
| PCYT2    | 1:1 | 781.3   | 1562.5  | 100000  | 400000  | 1.8 | 6  | 22 |
| FAM3D    | 1:1 | 48.8    | 97.7    | 12500   | 50000   | 2.1 | 4  | 18 |
| JPT2     | 1:1 |         |         |         |         |     | 8  | 39 |
| NDUFB7   | 1:1 |         |         |         |         |     | 9  | 33 |
| MTIF3    | 1:1 | 781.3   | 3125.0  | 100000  | 800000  | 1.5 |    |    |
| PCDH9    | 1:1 | 3125.0  | 6250.0  | 800000  | 800000  | 2.1 | 6  | 9  |
| ACOT13   | 1:1 | 781.3   | 781.3   | 25000   | 200000  | 1.5 | 8  | 37 |
| CYB5R2   | 1:1 |         |         |         |         |     | 6  | 9  |
| ARF6     | 1:1 |         |         |         |         |     |    |    |
| SUGP1    | 1:1 | 3125.0  | 6250.0  | 200000  | 800000  | 1.5 | 11 | 17 |
| GLIPR1   | 1:1 |         |         |         |         |     | 14 | 19 |
| RBP7     | 1:1 | 781.3   | 1562.5  | 100000  | 200000  | 1.8 | 7  | 14 |
| CETN3    | 1:1 | 781.3   | 781.3   | 50000   | 400000  | 1.8 | 4  | 18 |

**Table S3.** Differential expression of proteins in plasma samples of cancers patients compared to healthy individuals.

| Protein  | Male     |         | Females  |         |
|----------|----------|---------|----------|---------|
|          | npx dif  | pvalue  | npx dif  | pvalue  |
| MYBPC2   | -0.53755 | 0.14878 | 0.20023  | 0.52796 |
| PSMC3    | 0.16656  | 0.40771 | 0.09687  | 0.63534 |
| LSM1     | 0.11167  | 0.63633 | 0.66939  | 0.01222 |
| MELTF    | -0.12089 | 0.44802 | -0.21311 | 0.06270 |
| FCRL3    | 0.20374  | 0.30450 | -0.14799 | 0.44826 |
| FXYD5    | 0.28553  | 0.32044 | 1.29673  | 0.00002 |
| EFCAB2   | 0.24969  | 0.25550 | 0.67410  | 0.00094 |
| CD101    | 0.15190  | 0.34783 | 0.06182  | 0.71795 |
| NXPH3    | -0.05456 | 0.67390 | 0.04685  | 0.74823 |
| SHBG     | 0.52716  | 0.00025 | 0.12102  | 0.44859 |
| NEDD4L   | -0.17566 | 0.23970 | 1.06923  | 0.00000 |
| ARSA     | -0.19961 | 0.13432 | -0.15709 | 0.14906 |
| LPP      | -0.07109 | 0.74897 | 0.72533  | 0.00031 |
| WARS1    | 0.53443  | 0.00996 | 1.09616  | 0.00000 |
| ANK2     | 0.45513  | 0.11625 | -0.08243 | 0.74855 |
| JUN      | 0.21414  | 0.41711 | 0.69756  | 0.00695 |
| XRCC4    | -0.05471 | 0.76992 | 0.23520  | 0.17814 |
| EPCAM    | -0.09225 | 0.76451 | -0.25068 | 0.40228 |
| BST1     | -0.12302 | 0.33341 | -0.20325 | 0.10697 |
| SULT2A1  | 0.50271  | 0.22244 | 0.81810  | 0.06311 |
| APRT     | -0.14449 | 0.56707 | 1.47594  | 0.00000 |
| REXO2    | 0.26703  | 0.25800 | 0.09488  | 0.70954 |
| CBX2     | 0.15008  | 0.34432 | 0.12393  | 0.36114 |
| CNTNAP2  | 0.00806  | 0.95288 | -0.14341 | 0.28538 |
| PF4      | 0.24024  | 0.39048 | -1.18087 | 0.00000 |
| CDH4     | 0.59623  | 0.03489 | 0.00385  | 0.99099 |
| CD3E     | 0.63667  | 0.05407 | 0.05011  | 0.88847 |
| ANXA5    | 0.72769  | 0.00389 | 0.50998  | 0.04268 |
| MSLNL    | -0.25176 | 0.37905 | 0.11452  | 0.67187 |
| VEGFB    | 0.08362  | 0.46896 | 0.00934  | 0.93912 |
| VSIG4    | 0.70959  | 0.02098 | 0.64574  | 0.04060 |
| AMFR     | 0.03470  | 0.76433 | 0.14209  | 0.14609 |
| CD79B    | 0.35879  | 0.10883 | 0.05886  | 0.82133 |
| SPINK8   | 0.18598  | 0.15238 | -0.37221 | 0.07850 |
| CEND1    | -0.25928 | 0.35390 | -0.06525 | 0.78842 |
| APOM     | 0.01435  | 0.92202 | -0.20796 | 0.22179 |
| CLASP1   | 0.26965  | 0.36995 | 0.93202  | 0.00155 |
| PTEN     | 0.21479  | 0.47976 | 0.89413  | 0.00137 |
| CRKL     | -0.05651 | 0.85867 | 0.87102  | 0.00914 |
| MAP4K5   | 0.42232  | 0.27593 | 2.02107  | 0.00000 |
| BRD2     | 0.33100  | 0.24115 | 0.61185  | 0.02160 |
| TNFRSF19 | 0.21898  | 0.17521 | -0.29617 | 0.15593 |

|          |          |         |          |         |
|----------|----------|---------|----------|---------|
| NTRK3    | -0.06471 | 0.53182 | -0.20492 | 0.06721 |
| PSMD1    | -0.14992 | 0.67360 | 0.85853  | 0.00540 |
| GP5      | 0.10966  | 0.35284 | 0.04439  | 0.68393 |
| HEXIM1   | 0.46556  | 0.06672 | 1.57554  | 0.00000 |
| CPPED1   | -0.01927 | 0.94317 | 1.36299  | 0.00000 |
| S100A12  | 0.61446  | 0.03008 | -1.23252 | 0.00570 |
| IL12B    | 0.06782  | 0.74973 | -0.23538 | 0.37474 |
| DDR1     | 0.31751  | 0.02881 | 0.04668  | 0.72480 |
| RAC3     | 0.13901  | 0.27836 | 0.05022  | 0.74701 |
| DTD1     | 0.19603  | 0.57416 | 2.28786  | 0.00000 |
| FGF6     | -0.04988 | 0.77256 | -0.00756 | 0.96226 |
| SERPING1 | 0.17274  | 0.02041 | 0.02122  | 0.78023 |
| MRPL24   | 0.23625  | 0.24745 | 0.47081  | 0.00512 |
| TIMP2    | 0.04177  | 0.70776 | -0.01399 | 0.91008 |
| ICOSLG   | -0.12505 | 0.14237 | -0.57540 | 0.00157 |
| CD55     | 0.04338  | 0.72463 | -0.06933 | 0.62073 |
| DDX25    | 0.20561  | 0.36024 | 0.09787  | 0.71024 |
| KITLG    | -0.24076 | 0.21608 | -0.42816 | 0.02607 |
| PAEP     | 0.84083  | 0.01944 | -1.17090 | 0.01314 |
| MFAP4    | -0.07715 | 0.57220 | 0.34907  | 0.00646 |
| KYNU     | -0.01507 | 0.93939 | 0.68681  | 0.00094 |
| PRDX5    | -0.07123 | 0.71783 | 1.03901  | 0.00012 |
| TPM3     | -0.05958 | 0.77228 | -0.16340 | 0.40775 |
| TAB2     | 0.10970  | 0.72679 | 0.23145  | 0.39724 |
| ADAMTS13 | -0.20752 | 0.06579 | -0.84416 | 0.00000 |
| TREH     | -0.23201 | 0.44874 | -0.22641 | 0.38165 |
| PLXNA4   | 0.15645  | 0.55345 | 0.08713  | 0.74770 |
| ANXA11   | -0.09381 | 0.41030 | 0.30751  | 0.02195 |
| DSC2     | 0.52960  | 0.00230 | 0.10348  | 0.57025 |
| LIFR     | 0.11094  | 0.26523 | -0.18294 | 0.14582 |
| CXCL12   | -0.12895 | 0.43873 | -0.06488 | 0.74852 |
| BLVRB    | 0.03486  | 0.85720 | 0.83903  | 0.00003 |
| SCIN     | 0.25119  | 0.35538 | 0.22680  | 0.40086 |
| C2       | 0.11978  | 0.23442 | -0.41982 | 0.00300 |
| TNFRSF1A | 0.50379  | 0.01782 | 0.36082  | 0.10172 |
| NRXN3    | -0.20803 | 0.14567 | -0.15665 | 0.19391 |
| ADAMTS15 | -0.11988 | 0.58302 | 0.87998  | 0.00395 |
| INPP5D   | 0.15971  | 0.51405 | 0.60006  | 0.01204 |
| FGF5     | 0.17331  | 0.19538 | 0.08490  | 0.57326 |
| NGRN     | 0.22981  | 0.22366 | 0.49189  | 0.00097 |
| RNF149   | 0.28788  | 0.04909 | 0.22003  | 0.10821 |
| CBLN4    | -0.54022 | 0.00877 | -0.79497 | 0.00226 |
| ATP5PO   | 0.35123  | 0.04242 | 0.22590  | 0.15923 |
| ZNF174   | 0.07571  | 0.66811 | 0.27659  | 0.24766 |
| SH3GLB2  | 0.14101  | 0.49690 | 1.10753  | 0.00000 |
| MORF4L2  | 0.18319  | 0.39628 | 0.05478  | 0.80412 |
| TPD52L2  | 0.07388  | 0.81177 | 1.83805  | 0.00000 |
| ARHGAP30 | 0.13173  | 0.57557 | 0.35286  | 0.05568 |

|          |          |         |          |         |
|----------|----------|---------|----------|---------|
| PTN      | 0.85480  | 0.08049 | 1.09051  | 0.02271 |
| CDC37    | 0.24921  | 0.40762 | 1.83394  | 0.00000 |
| CCL27    | 0.62306  | 0.00016 | -0.00431 | 0.97809 |
| NELL2    | -0.05586 | 0.69427 | -0.15739 | 0.27214 |
| CACNA1H  | -0.15055 | 0.59162 | 0.37254  | 0.18752 |
| IL17C    | 0.22218  | 0.47394 | 0.42190  | 0.16943 |
| TMEM132A | 0.04759  | 0.87028 | 0.24923  | 0.30668 |
| CDH15    | 0.15806  | 0.41115 | -0.16563 | 0.33604 |
| ADAM8    | -0.11352 | 0.48841 | -0.17450 | 0.28603 |
| EIF4B    | 0.19202  | 0.41468 | 2.45061  | 0.00000 |
| KLRF1    | 0.37352  | 0.09194 | 0.10676  | 0.62871 |
| CD14     | 0.37622  | 0.04123 | 0.40662  | 0.04773 |
| NECTIN1  | 0.03954  | 0.72074 | -0.03465 | 0.72865 |
| ATP5IF1  | 0.17107  | 0.65841 | 2.14878  | 0.00000 |
| HTR1A    | -0.12018 | 0.74581 | -0.16121 | 0.60402 |
| RAB2B    | -0.51485 | 0.02742 | -0.39417 | 0.06020 |
| FNDC1    | -0.27700 | 0.20777 | -0.47928 | 0.01432 |
| CRIP2    | 0.35635  | 0.05272 | -0.27613 | 0.23874 |
| MMP15    | 0.01838  | 0.90145 | 0.14039  | 0.39008 |
| FCGR3B   | -0.00196 | 0.98895 | -0.12414 | 0.40822 |
| SELENOP  | -0.05851 | 0.61900 | -0.17819 | 0.17118 |
| KLRC1    | 0.12565  | 0.65020 | -0.08711 | 0.77004 |
| LRRC59   | 0.22024  | 0.53717 | 0.81075  | 0.00530 |
| LY75     | -0.03810 | 0.78615 | -0.21410 | 0.18689 |
| GART     | -0.06052 | 0.74359 | 0.03641  | 0.85462 |
| SERPINB1 | -0.37699 | 0.35173 | 1.05191  | 0.01769 |
| GPC5     | -0.52548 | 0.02346 | -0.79586 | 0.00016 |
| PALLD    | 0.56932  | 0.00668 | -0.18210 | 0.39955 |
| CPQ      | 0.05409  | 0.71475 | 0.15021  | 0.24337 |
| CCDC50   | 0.40990  | 0.02588 | 1.36540  | 0.00000 |
| ATP1B2   | -0.13238 | 0.43821 | -0.30415 | 0.07468 |
| SERPINB8 | -0.01422 | 0.97026 | 1.09448  | 0.00634 |
| ECI2     | 0.72939  | 0.03775 | 0.54739  | 0.07933 |
| CNTN3    | -0.21035 | 0.04553 | -0.02385 | 0.86638 |
| CCL24    | -0.11288 | 0.62153 | 0.19100  | 0.40911 |
| CEACAM1  | 0.12257  | 0.31584 | 0.03936  | 0.77761 |
| CBLN1    | 0.03943  | 0.93670 | -0.37747 | 0.46546 |
| LMNB1    | 0.28925  | 0.40107 | -0.07571 | 0.82910 |
| EDIL3    | 0.03640  | 0.81617 | -1.54333 | 0.00000 |
| CD36     | 0.01355  | 0.91890 | -0.56985 | 0.00007 |
| ECSCR    | 0.29523  | 0.13087 | 0.13497  | 0.51580 |
| MASP1    | -0.08847 | 0.42240 | -0.12275 | 0.24503 |
| M6PR     | 0.07544  | 0.59423 | -0.34836 | 0.01069 |
| PROCR    | 0.06670  | 0.72022 | -0.09868 | 0.35988 |
| FAM3C    | 0.15321  | 0.23731 | -0.26666 | 0.08908 |
| NCAM1    | -0.26507 | 0.03068 | -0.18563 | 0.17170 |
| NEB      | 0.02106  | 0.92924 | -0.04500 | 0.80860 |
| HMGCS1   | -0.02739 | 0.88852 | 0.42999  | 0.10846 |

|          |          |         |          |         |
|----------|----------|---------|----------|---------|
| SART1    | 0.58917  | 0.15332 | 0.95556  | 0.01373 |
| SYNGAP1  | -0.05538 | 0.82864 | -0.12273 | 0.63552 |
| SIAE     | 0.03561  | 0.84485 | -0.57990 | 0.00081 |
| TOR1AIP1 | -0.08996 | 0.84997 | 1.90498  | 0.00003 |
| GIMAP7   | 0.06955  | 0.73820 | 0.20380  | 0.28589 |
| GDF15    | 0.94431  | 0.00182 | 1.17266  | 0.00016 |
| AKR1B10  | 0.41511  | 0.33256 | 0.45416  | 0.29296 |
| CNST     | 0.66082  | 0.03089 | 1.04594  | 0.00011 |
| TPP1     | 0.10680  | 0.48560 | -0.28931 | 0.05604 |
| BOC      | 0.02509  | 0.81287 | -0.41106 | 0.00199 |
| KLK10    | -0.17368 | 0.36921 | -0.26781 | 0.11137 |
| IL25     | 0.58527  | 0.00955 | 0.19802  | 0.29977 |
| GZMH     | 1.26414  | 0.00897 | 0.51275  | 0.14485 |
| TRIAP1   | 0.56523  | 0.03402 | 1.44770  | 0.00000 |
| VSIG2    | 0.45345  | 0.10102 | 0.10743  | 0.62911 |
| IDI2     | 0.08376  | 0.69091 | 0.09248  | 0.68610 |
| CD5L     | 0.35129  | 0.02570 | 0.24589  | 0.11528 |
| CDH17    | 0.00988  | 0.97508 | -0.37504 | 0.14725 |
| HJV      | 0.11503  | 0.45564 | -0.16209 | 0.35524 |
| TBC1D5   | -0.66426 | 0.05481 | -0.28087 | 0.40216 |
| VMO1     | 0.52096  | 0.00657 | 0.08491  | 0.72468 |
| HBQ1     | 0.09822  | 0.62860 | 1.31510  | 0.00000 |
| REG3G    | 0.30430  | 0.17066 | -0.05631 | 0.79489 |
| RBP7     | 0.45254  | 0.24661 | 1.13848  | 0.00187 |
| PTGES2   | 0.55658  | 0.07508 | 0.68218  | 0.02124 |
| FCRL5    | 0.04590  | 0.82174 | -0.31792 | 0.09598 |
| CA12     | 0.33803  | 0.07803 | -0.13742 | 0.52853 |
| APCS     | -0.03482 | 0.80545 | -0.05567 | 0.72022 |
| PROS1    | -0.02520 | 0.83164 | -0.34980 | 0.00035 |
| CSTB     | 0.14003  | 0.50027 | 0.89941  | 0.00003 |
| VEGFD    | 0.13662  | 0.43097 | -0.35645 | 0.09823 |
| MERTK    | 0.25213  | 0.04797 | -0.00690 | 0.97008 |
| PPP2R5A  | -0.42743 | 0.34725 | 2.76423  | 0.00000 |
| PIK3IP1  | 0.38958  | 0.01388 | 0.23802  | 0.13600 |
| HIF1A    | -0.32221 | 0.34797 | 0.25407  | 0.41027 |
| PTTG1    | 1.20231  | 0.00954 | 0.96766  | 0.02919 |
| NPHS1    | -0.23158 | 0.06690 | -0.46114 | 0.00173 |
| SUGP1    | -0.36668 | 0.16260 | 0.42677  | 0.09051 |
| ISLR2    | -0.20436 | 0.13877 | -0.30586 | 0.04695 |
| CSF2     | -0.04860 | 0.82658 | -0.13526 | 0.62171 |
| GPR37    | 0.29817  | 0.36518 | 1.61632  | 0.00002 |
| CNTN5    | -0.47347 | 0.00131 | -0.46970 | 0.00166 |
| HNF1A    | -0.00959 | 0.96997 | 0.35445  | 0.16267 |
| NENF     | 0.08865  | 0.73976 | -0.23146 | 0.42934 |
| GALNT10  | 0.08978  | 0.36887 | -0.33162 | 0.04042 |
| DPY30    | 0.42988  | 0.21391 | 0.82684  | 0.01403 |
| CHAD     | -0.74028 | 0.02303 | -0.46123 | 0.12149 |
| CEMIP2   | -0.01704 | 0.90294 | -0.12916 | 0.34986 |

|          |          |         |          |         |
|----------|----------|---------|----------|---------|
| IFNGR2   | -0.03780 | 0.83635 | -0.23976 | 0.25287 |
| BRME1    | 0.09988  | 0.58340 | 0.17745  | 0.30781 |
| IL6ST    | 0.06822  | 0.44132 | -0.07342 | 0.48628 |
| FCRLB    | 0.52111  | 0.03760 | 0.07935  | 0.77040 |
| APOA4    | -0.06283 | 0.76536 | -0.67907 | 0.00136 |
| CDA      | -0.22521 | 0.35890 | 0.64602  | 0.00768 |
| ABHD14B  | -0.28495 | 0.34045 | 0.03050  | 0.91560 |
| REG1B    | 0.63547  | 0.02533 | 0.02071  | 0.94213 |
| CD200R1  | -0.09171 | 0.46560 | -0.25126 | 0.15196 |
| SAA4     | 0.07727  | 0.39475 | -0.22539 | 0.00412 |
| DNAJC9   | 0.49356  | 0.09286 | 2.56753  | 0.00000 |
| CDHR2    | 0.30005  | 0.25335 | 0.52464  | 0.06665 |
| RPE      | -0.21399 | 0.41017 | 1.13974  | 0.00000 |
| PPY      | 0.92072  | 0.02388 | 0.27666  | 0.41889 |
| TGFBR1   | 0.51658  | 0.04549 | 0.06911  | 0.77805 |
| DNAJA2   | -0.49272 | 0.06262 | -0.00063 | 0.99838 |
| NOS3     | 0.72892  | 0.00703 | 0.65304  | 0.01385 |
| CD274    | 0.36229  | 0.13913 | 0.13755  | 0.57465 |
| CMC1     | 0.29267  | 0.38314 | 1.55945  | 0.00000 |
| CA6      | -0.90942 | 0.00087 | -1.12010 | 0.00003 |
| CTRB1    | 0.29382  | 0.25189 | -0.24456 | 0.34132 |
| PADI4    | -0.25746 | 0.58179 | 0.11474  | 0.81417 |
| TMCO5A   | 0.47160  | 0.03076 | 0.90314  | 0.00592 |
| DKKL1    | 0.41715  | 0.13115 | -0.39369 | 0.10802 |
| CHP1     | 0.59068  | 0.20166 | 0.32628  | 0.48755 |
| MUCL3    | 0.46256  | 0.08035 | -0.15850 | 0.47941 |
| SLAMF1   | 0.06449  | 0.73763 | -0.21858 | 0.25368 |
| BANK1    | -0.05689 | 0.85043 | 0.60394  | 0.08726 |
| PKD2     | 0.15797  | 0.65646 | -0.28650 | 0.41074 |
| CELSR2   | -0.43121 | 0.01347 | 0.19268  | 0.28924 |
| CX3CL1   | 0.11793  | 0.53322 | 0.11180  | 0.55978 |
| INSR     | 0.12409  | 0.39524 | 0.06427  | 0.61145 |
| C8B      | -0.14326 | 0.12487 | -0.20898 | 0.03055 |
| RALY     | 0.33906  | 0.40244 | 0.38748  | 0.31414 |
| NEXN     | 0.17434  | 0.59690 | 1.85486  | 0.00000 |
| BSND     | 0.53750  | 0.05272 | -0.77104 | 0.00829 |
| ACOX1    | 0.30225  | 0.37498 | 1.21862  | 0.00034 |
| AHSP     | 0.00634  | 0.98155 | 1.69813  | 0.00000 |
| CXCL14   | 0.36994  | 0.02363 | 0.26022  | 0.11966 |
| HNRNPUL1 | 0.24840  | 0.36140 | 1.04593  | 0.00013 |
| NFATC3   | 0.28143  | 0.24712 | 0.17070  | 0.34221 |
| PAG1     | -0.15248 | 0.66890 | 0.66744  | 0.05510 |
| DYNLT1   | 0.21154  | 0.50614 | 0.42851  | 0.15963 |
| COMMD1   | -0.15325 | 0.54516 | 0.81210  | 0.00110 |
| BSG      | 0.18344  | 0.07994 | -0.30965 | 0.02848 |
| PAK4     | 0.22032  | 0.46091 | 1.04771  | 0.00030 |
| ARMCX2   | 0.18827  | 0.34207 | -0.11709 | 0.64175 |
| CD46     | 0.00345  | 0.98063 | -0.10306 | 0.49203 |



|          |          |         |          |         |
|----------|----------|---------|----------|---------|
| CDH6     | 0.33362  | 0.06248 | -0.37931 | 0.01038 |
| PILRA    | 0.30623  | 0.05329 | 0.20914  | 0.23792 |
| C1R      | -0.02714 | 0.65524 | -0.09009 | 0.15235 |
| MMP9     | 0.85726  | 0.00209 | -0.06628 | 0.80429 |
| BNIP2    | 0.09617  | 0.73928 | 0.52873  | 0.06021 |
| HAVCR2   | 0.52028  | 0.01753 | 0.28889  | 0.21389 |
| VTCN1    | 0.26518  | 0.29737 | -0.05404 | 0.83688 |
| ENTPD2   | 0.52397  | 0.09842 | 0.03889  | 0.84865 |
| MAD1L1   | 0.24115  | 0.50714 | 0.84541  | 0.02468 |
| GTF2IRD1 | 0.07626  | 0.72005 | -0.15197 | 0.62997 |
| AFM      | -0.28834 | 0.03671 | -0.25651 | 0.04224 |
| FOLH1    | 0.61868  | 0.06232 | 0.47530  | 0.10011 |
| DCBLD2   | 0.49376  | 0.00045 | 0.22766  | 0.15624 |
| CBLIF    | -0.30808 | 0.31484 | -0.66563 | 0.04310 |
| RABEP1   | -0.45076 | 0.11624 | 0.20997  | 0.41088 |
| CCND2    | -0.42796 | 0.36631 | -0.08851 | 0.77653 |
| GZMA     | 0.18000  | 0.35949 | 0.07979  | 0.69927 |
| PADI2    | 0.34387  | 0.26205 | 0.58304  | 0.09967 |
| IL22RA1  | 0.13691  | 0.50501 | -0.31885 | 0.04991 |
| DNM1     | 0.40380  | 0.29256 | 2.85623  | 0.00000 |
| GAS2     | 0.35025  | 0.29775 | 0.36712  | 0.19631 |
| LRG1     | 0.63010  | 0.00140 | 0.36870  | 0.03735 |
| SNX5     | -0.18679 | 0.29928 | 0.51589  | 0.00092 |
| CASP4    | -0.03735 | 0.94036 | 0.31772  | 0.51321 |
| CLEC1B   | 0.10717  | 0.72880 | -0.77639 | 0.00415 |
| LCP1     | -0.34432 | 0.05457 | 0.31953  | 0.03166 |
| NHLRC3   | 0.16881  | 0.20832 | -0.25317 | 0.02420 |
| C4BPB    | 0.03889  | 0.83396 | 0.14233  | 0.46120 |
| HARS1    | 0.06615  | 0.80301 | 1.75592  | 0.00000 |
| ZBTB16   | -0.02648 | 0.92397 | 0.37969  | 0.13271 |
| ENPP2    | -0.05894 | 0.59709 | 0.01165  | 0.92042 |
| GALNT3   | -0.12436 | 0.50428 | -0.35174 | 0.06851 |
| SPART    | -0.62160 | 0.04349 | -0.35059 | 0.22835 |
| VASH1    | 0.27892  | 0.37790 | 1.36599  | 0.00001 |
| LCN15    | 0.46731  | 0.08290 | 0.59642  | 0.00384 |
| COCH     | 0.23006  | 0.10500 | -0.09134 | 0.54782 |
| LATS1    | 0.38776  | 0.30896 | 1.98742  | 0.00000 |
| RPS10    | 0.01411  | 0.94415 | 0.17060  | 0.39434 |
| DCXR     | -0.09488 | 0.70800 | 0.91040  | 0.00006 |
| TNIP1    | -0.35462 | 0.30514 | 0.02214  | 0.94986 |
| ITIH3    | 0.64595  | 0.00002 | 0.15819  | 0.28538 |
| NPPC     | -0.55808 | 0.01031 | -0.40308 | 0.13896 |
| ITGB6    | -0.06452 | 0.72547 | -0.53182 | 0.00294 |
| UROS     | -0.19669 | 0.48311 | 0.79209  | 0.00554 |
| MECR     | 0.65256  | 0.11491 | 2.14546  | 0.00000 |
| HGFAC    | 0.11421  | 0.37388 | -0.13736 | 0.24940 |
| IL7R     | -0.12910 | 0.39951 | -0.22836 | 0.16416 |
| RTN4R    | 0.05333  | 0.67874 | -0.13123 | 0.43847 |

|                    |          |         |          |         |
|--------------------|----------|---------|----------|---------|
| ANKMY2             | -0.14391 | 0.63709 | 0.83310  | 0.00417 |
| TMOD4              | -0.17326 | 0.51259 | 0.31982  | 0.13363 |
| CSF1R              | 0.07508  | 0.66725 | 0.04397  | 0.77099 |
| SPINT1             | 0.25655  | 0.17818 | -0.03820 | 0.81937 |
| MTPN               | -0.29095 | 0.20143 | -0.70607 | 0.00001 |
| DEFB104A; DEFB104E | 0.07521  | 0.68135 | -0.05076 | 0.84090 |
| FLT1               | 0.12167  | 0.44179 | 0.24571  | 0.19758 |
| RNF41              | -0.56354 | 0.01933 | 0.73886  | 0.01365 |
| APOF               | -0.04398 | 0.73063 | 0.13951  | 0.23295 |
| PRG2               | 0.53237  | 0.01671 | 0.26866  | 0.22604 |
| GORASP2            | 0.18139  | 0.46842 | 0.99874  | 0.00003 |
| CDH5               | -0.05083 | 0.66150 | -0.24923 | 0.06597 |
| CA13               | -0.12734 | 0.72356 | 0.92850  | 0.01052 |
| PECAM1             | 0.17352  | 0.20670 | -0.08674 | 0.53131 |
| SLITRK6            | -0.01005 | 0.93638 | -0.21295 | 0.13009 |
| TGM2               | 0.20215  | 0.40765 | 2.61904  | 0.00000 |
| TJP3               | 0.22840  | 0.08998 | 0.08358  | 0.68929 |
| PIKFYVE            | 0.14559  | 0.63922 | 0.75908  | 0.00555 |
| PRCP               | -0.05454 | 0.65087 | 0.08560  | 0.48105 |
| GUK1               | 0.25504  | 0.19075 | -0.20745 | 0.23247 |
| GBP2               | -0.65788 | 0.06293 | -0.00895 | 0.97904 |
| VPS37A             | -0.15376 | 0.57326 | 0.62773  | 0.01033 |
| ATRAID             | 0.31887  | 0.05969 | 0.04766  | 0.75994 |
| RHOC               | 0.72345  | 0.07491 | 2.16282  | 0.00000 |
| PER3               | 0.15092  | 0.78077 | 2.16723  | 0.00003 |
| GLYR1              | 0.09939  | 0.75537 | 0.16024  | 0.60456 |
| SOST               | 0.04070  | 0.77494 | 0.36776  | 0.04664 |
| CLIP2              | -0.01807 | 0.95991 | 1.44919  | 0.00027 |
| CLEC4A             | -0.43856 | 0.00162 | -0.29024 | 0.05373 |
| PCYT2              | 0.36241  | 0.21606 | 2.07533  | 0.00000 |
| PRKAG3             | 0.32733  | 0.40217 | 0.79309  | 0.05685 |
| TPSD1              | 0.04834  | 0.74018 | -0.00094 | 0.99555 |
| AMIGO2             | -0.01431 | 0.84257 | -0.23699 | 0.19663 |
| ADGRG2             | -0.10663 | 0.44271 | -0.44314 | 0.00181 |
| PSMA1              | 0.00738  | 0.97447 | -0.14603 | 0.55017 |
| EDDM3B             | -0.25216 | 0.21513 | -0.08896 | 0.57552 |
| HMBS               | 0.06387  | 0.67965 | 1.34440  | 0.00000 |
| CLEC2L             | 0.54953  | 0.00703 | 0.33469  | 0.13030 |
| TNXB               | -0.31806 | 0.00430 | -0.41746 | 0.00177 |
| LILRA6             | 0.48303  | 0.02771 | -0.05835 | 0.79055 |
| BRSK2              | -0.06639 | 0.80133 | -0.16784 | 0.40464 |
| REST               | 0.30520  | 0.19633 | 0.19776  | 0.45204 |
| AKT3               | -0.02889 | 0.91138 | 0.31668  | 0.25646 |
| CIAPIN1            | -0.14115 | 0.57462 | 0.33465  | 0.16002 |
| CTSB               | 0.40857  | 0.10465 | 0.40769  | 0.10339 |
| ACADSB             | 0.24023  | 0.54121 | 1.57176  | 0.00003 |
| COPE               | 0.10730  | 0.63494 | 0.23845  | 0.42767 |
| FABP9              | -0.32899 | 0.08664 | -0.62495 | 0.00136 |

|               |          |         |          |         |
|---------------|----------|---------|----------|---------|
| CTSL          | 0.33213  | 0.06532 | 0.28386  | 0.13779 |
| CASP9         | -0.13314 | 0.74972 | 0.14770  | 0.69655 |
| FGF19         | 0.23791  | 0.35405 | -0.52893 | 0.06519 |
| NGF           | 0.07216  | 0.23466 | -0.04835 | 0.21119 |
| LRP2BP        | -0.12243 | 0.69377 | 0.21138  | 0.59202 |
| AMOT          | -0.28391 | 0.11368 | -0.57431 | 0.00223 |
| USP25         | 0.04035  | 0.86239 | 0.32964  | 0.14748 |
| NDUFS6        | -0.05527 | 0.88000 | 0.65449  | 0.08774 |
| KIT           | -0.36643 | 0.00487 | -0.37156 | 0.00743 |
| CXCL5         | -0.10417 | 0.78575 | -0.78189 | 0.01713 |
| DAPP1         | 0.19695  | 0.66142 | 3.77985  | 0.00000 |
| RETN          | -0.00496 | 0.98661 | 0.41242  | 0.11595 |
| IGFBP2        | 1.32805  | 0.00000 | 0.66070  | 0.00749 |
| IL1RL2        | -0.16845 | 0.21408 | 0.13819  | 0.43297 |
| MAMDC4        | -0.15473 | 0.49294 | -0.86495 | 0.00105 |
| BOLA2B; BOLA2 | -0.02000 | 0.90481 | 1.17527  | 0.00000 |
| ITPRIP        | 0.20747  | 0.09948 | -0.17729 | 0.18237 |
| MAPK13        | 0.27499  | 0.47556 | 0.62510  | 0.06992 |
| NOTCH2        | 0.01538  | 0.85430 | -0.17511 | 0.06577 |
| PGLYRP2       | -0.13975 | 0.38587 | -0.12621 | 0.29107 |
| ADAMTSL2      | 0.05466  | 0.70796 | -0.04560 | 0.71702 |
| CIRBP         | 0.15172  | 0.60784 | 1.65281  | 0.00000 |
| CHIT1         | 0.50944  | 0.11845 | 0.74645  | 0.05292 |
| SLURP1        | -0.03295 | 0.82286 | -0.06192 | 0.62137 |
| RNASEH2A      | -0.45932 | 0.09672 | 0.28404  | 0.29924 |
| HLA-E         | 0.17663  | 0.06033 | 0.25288  | 0.02388 |
| SNAP29        | -0.19014 | 0.55051 | 0.14021  | 0.63253 |
| ADGRB3        | -0.02403 | 0.89080 | -0.11450 | 0.57480 |
| AZU1          | -0.07175 | 0.84194 | -1.13127 | 0.00642 |
| PPBP          | 0.33097  | 0.19682 | -1.02302 | 0.00001 |
| PPME1         | 0.16691  | 0.43401 | 1.58478  | 0.00000 |
| MOG           | 0.34569  | 0.03413 | -0.00347 | 0.97915 |
| CHRDL2        | 0.03145  | 0.86268 | -0.45470 | 0.04694 |
| ALDH5A1       | 0.24737  | 0.49636 | 1.12109  | 0.00032 |
| CAMLG         | 0.41045  | 0.16526 | 0.69355  | 0.01084 |
| SUGT1         | 0.02251  | 0.93331 | 1.62998  | 0.00000 |
| CNDP1         | -0.44160 | 0.03879 | -1.45719 | 0.00000 |
| VTI1A         | -0.36500 | 0.20530 | -0.18344 | 0.48656 |
| CLEC4G        | 0.07036  | 0.60651 | -0.02572 | 0.86281 |
| ESPL1         | 0.41194  | 0.07087 | -0.02547 | 0.91388 |
| CLEC4C        | -0.15296 | 0.51012 | -0.60093 | 0.01587 |
| SIGLEC7       | 0.16280  | 0.14557 | 0.05784  | 0.64604 |
| PRR5          | 0.09276  | 0.61542 | 0.62707  | 0.00132 |
| CDK1          | 0.73133  | 0.00133 | 0.29995  | 0.18710 |
| BAIAP2        | 0.19076  | 0.58599 | 0.57672  | 0.04463 |
| EIF5A         | 0.09495  | 0.40699 | -0.21385 | 0.03145 |
| CCN5          | 0.14580  | 0.41565 | 0.30995  | 0.10040 |
| CYB5A         | 0.37430  | 0.25972 | 0.57636  | 0.05486 |

|           |          |         |          |         |
|-----------|----------|---------|----------|---------|
| PDE1C     | 0.51822  | 0.01598 | 0.12281  | 0.62591 |
| AGER      | -0.16245 | 0.28228 | -0.06974 | 0.65081 |
| DGKZ      | -0.43588 | 0.01843 | -0.06607 | 0.69053 |
| PFKFB2    | -0.04686 | 0.88635 | 1.38121  | 0.00060 |
| RANGAP1   | -0.13194 | 0.36029 | 0.00226  | 0.98793 |
| RNF31     | -0.53179 | 0.03945 | 0.02628  | 0.92593 |
| PZP       | 0.33079  | 0.26450 | 0.05891  | 0.83879 |
| FMR1      | -0.62478 | 0.12243 | 0.86927  | 0.00723 |
| CD33      | -0.18493 | 0.40142 | 0.19063  | 0.36733 |
| PTPRB     | 0.00950  | 0.93090 | 0.36308  | 0.00140 |
| TNFRSF10C | 0.10600  | 0.48073 | -0.12758 | 0.43733 |
| LETM1     | 0.99535  | 0.00516 | 1.33388  | 0.00000 |
| TSC22D1   | 0.36423  | 0.10328 | 0.84352  | 0.00014 |
| PAPPA     | 0.09633  | 0.73019 | -0.04198 | 0.88563 |
| SLC9A3R2  | 0.23667  | 0.20915 | 0.25184  | 0.13589 |
| GAL       | -0.15917 | 0.53875 | -1.54599 | 0.00000 |
| AGR3      | 0.00382  | 0.99187 | -0.53902 | 0.13620 |
| ZFYVE19   | -0.10520 | 0.74785 | 2.30845  | 0.00000 |
| ZCCHC8    | 0.35219  | 0.35887 | 0.68183  | 0.06412 |
| ESM1      | 0.26322  | 0.22395 | 0.91059  | 0.00001 |
| KIF1C     | 0.42390  | 0.10426 | 0.58928  | 0.01550 |
| PDCD6     | -0.02828 | 0.87578 | 0.04848  | 0.78094 |
| SMARCA2   | -0.00384 | 0.99018 | -0.27754 | 0.38466 |
| RRP15     | 0.19937  | 0.75050 | -0.03761 | 0.95367 |
| ACTN2     | 0.25642  | 0.45278 | 0.61469  | 0.04358 |
| GADD45B   | 0.29744  | 0.53125 | 0.25864  | 0.55498 |
| TFPI      | 0.41332  | 0.00616 | 0.36085  | 0.04329 |
| LDLRAP1   | 0.42281  | 0.28663 | 2.84144  | 0.00000 |
| EFNA4     | 0.20152  | 0.36745 | -0.14826 | 0.48392 |
| SLC16A1   | 0.34412  | 0.11328 | -0.24989 | 0.29489 |
| AGBL2     | 0.32231  | 0.55141 | 0.52825  | 0.33064 |
| SLC39A5   | 0.41955  | 0.03707 | 0.60632  | 0.00258 |
| LPCAT2    | -0.25197 | 0.37623 | 0.13626  | 0.68361 |
| NMI       | 0.14951  | 0.57996 | 1.05301  | 0.00031 |
| JPT2      | 0.37833  | 0.15373 | 1.57037  | 0.00000 |
| PTPN1     | -0.36303 | 0.24211 | -0.22447 | 0.43094 |
| LTBP2     | 0.60012  | 0.00419 | 0.30543  | 0.16558 |
| OTUD6B    | -0.08596 | 0.70292 | 0.57446  | 0.00953 |
| LY6D      | 0.13090  | 0.47552 | 0.03497  | 0.83420 |
| VASN      | -0.01304 | 0.89797 | -0.06468 | 0.56010 |
| LILRB2    | 0.24970  | 0.07166 | 0.02414  | 0.86765 |
| TLR2      | 0.05851  | 0.82965 | -0.67709 | 0.02061 |
| EBAG9     | 0.35046  | 0.27821 | 1.98975  | 0.00000 |
| ATP6AP2   | 0.20282  | 0.17183 | -0.41834 | 0.00806 |
| EIF4E     | 0.28199  | 0.43074 | 3.23186  | 0.00000 |
| CCL26     | -0.09370 | 0.77008 | 0.00485  | 0.98692 |
| PHYKPL    | 0.06625  | 0.73675 | 0.66241  | 0.00024 |
| GSAP      | 0.09244  | 0.71356 | 0.11516  | 0.71735 |

|           |          |         |          |         |
|-----------|----------|---------|----------|---------|
| LACTB2    | 0.05976  | 0.81308 | 1.04460  | 0.00001 |
| SCARB2    | 0.25550  | 0.25526 | 0.33772  | 0.13895 |
| EIF1AX    | 0.11785  | 0.73582 | 0.02780  | 0.91744 |
| SMPDL3A   | -0.25746 | 0.23696 | 0.22783  | 0.25948 |
| IL32      | -0.01530 | 0.93328 | -0.42951 | 0.04865 |
| LTA4H     | -0.42851 | 0.03645 | 0.33449  | 0.06791 |
| CRYGD     | 0.06504  | 0.84617 | 1.14448  | 0.00015 |
| DNAJB2    | -0.24472 | 0.27176 | 0.58133  | 0.00686 |
| EGFLAM    | 0.12559  | 0.53819 | -0.03868 | 0.83612 |
| CRISP3    | -0.07119 | 0.40190 | -0.26565 | 0.00120 |
| TMED4     | 0.27155  | 0.29792 | 0.40500  | 0.18542 |
| ACAN      | -0.03608 | 0.74798 | -0.02620 | 0.78076 |
| NEK7      | -0.10627 | 0.73985 | 1.00709  | 0.00092 |
| GET3      | 0.15659  | 0.51807 | 0.38701  | 0.03823 |
| TNFRSF9   | 0.21782  | 0.22898 | 0.07502  | 0.71243 |
| PAXX      | 0.02141  | 0.92629 | 1.02060  | 0.00000 |
| CLEC12A   | -0.00382 | 0.98397 | -0.19403 | 0.29646 |
| IMPA1     | -0.20639 | 0.42389 | 1.40005  | 0.00000 |
| NUBP1     | -0.25137 | 0.68755 | -0.60248 | 0.33731 |
| A1BG      | 0.14235  | 0.11839 | 0.14327  | 0.10720 |
| BCL7A     | -0.03900 | 0.91641 | 0.32176  | 0.37169 |
| TREML1    | 0.16414  | 0.60062 | -1.19193 | 0.00007 |
| SERPINA11 | 0.10334  | 0.46633 | 0.14325  | 0.38219 |
| CORO1A    | -0.57706 | 0.18288 | 0.46711  | 0.26062 |
| CPM       | -0.15230 | 0.29459 | -0.05036 | 0.73925 |
| PTPRS     | -0.14921 | 0.07789 | -0.27460 | 0.01283 |
| GSTA1     | -0.47924 | 0.32431 | 0.94097  | 0.03326 |
| S100P     | 0.37221  | 0.32660 | 0.61765  | 0.09355 |
| PAGR1     | 0.16040  | 0.56552 | 0.91431  | 0.00129 |
| ERBIN     | -0.02544 | 0.93788 | 1.08165  | 0.00173 |
| KLK14     | -0.33845 | 0.10327 | -0.42153 | 0.08857 |
| MAGED1    | 0.38285  | 0.04901 | 0.35832  | 0.03645 |
| FLT3      | -0.33727 | 0.02775 | -0.96402 | 0.00000 |
| CCL28     | 0.44222  | 0.11931 | -0.10886 | 0.67721 |
| LRTM1     | -0.43435 | 0.19764 | -0.38024 | 0.38564 |
| ITIH5     | -0.14081 | 0.60364 | -0.11923 | 0.61642 |
| PTH1R     | 0.11987  | 0.27077 | -0.04020 | 0.74652 |
| NCS1      | 0.16130  | 0.31790 | -0.31890 | 0.19054 |
| NPC2      | 0.06609  | 0.65938 | 0.23769  | 0.09696 |
| EDAR      | -0.49567 | 0.10503 | -1.32175 | 0.00002 |
| KLRB1     | 0.26981  | 0.05666 | -0.00674 | 0.97457 |
| FST       | 0.39359  | 0.04300 | 0.40506  | 0.09008 |
| PDGFB     | 0.21961  | 0.39639 | -0.72618 | 0.00254 |
| REPS1     | 0.27015  | 0.20222 | 0.75877  | 0.00109 |
| IL20RB    | 0.01822  | 0.85959 | -0.17378 | 0.07050 |
| BTN3A2    | 0.10258  | 0.48632 | -0.16720 | 0.35656 |
| RASA1     | 0.14556  | 0.14071 | -0.07712 | 0.41620 |
| DNMBP     | -0.31221 | 0.35059 | -0.48147 | 0.16249 |

|          |          |         |          |         |
|----------|----------|---------|----------|---------|
| IL2RA    | 0.39434  | 0.05282 | 0.04499  | 0.83416 |
| PCBP2    | 0.27422  | 0.35099 | 2.17909  | 0.00000 |
| POLR2F   | 0.34450  | 0.30517 | 0.90559  | 0.00546 |
| CD300LG  | 0.05543  | 0.66937 | 0.10333  | 0.43872 |
| WAS      | -0.13403 | 0.73837 | -0.52882 | 0.15709 |
| COL15A1  | -0.35804 | 0.01288 | -0.11637 | 0.36929 |
| TFRC     | 0.34186  | 0.07928 | 1.13166  | 0.00000 |
| SELL     | -0.27091 | 0.00614 | -0.30485 | 0.00234 |
| APOA2    | 0.28258  | 0.32627 | -1.90699 | 0.00000 |
| CD40LG   | 0.66315  | 0.01203 | -0.90930 | 0.00144 |
| BAG4     | -0.10537 | 0.71654 | 0.89034  | 0.00113 |
| SIRT1    | 0.01103  | 0.94859 | 0.06502  | 0.74272 |
| ALCAM    | 0.07166  | 0.49092 | -0.01689 | 0.89602 |
| CCL25    | 0.26255  | 0.12502 | -0.43810 | 0.07577 |
| INHBB    | 0.60888  | 0.00963 | 0.40514  | 0.06672 |
| GCLM     | -0.02045 | 0.92100 | 0.62831  | 0.00188 |
| LRRC25   | 0.16707  | 0.32112 | 0.00733  | 0.97253 |
| OGA      | -0.15765 | 0.49214 | 0.74541  | 0.00152 |
| GABARAP  | 0.13270  | 0.59965 | -0.16077 | 0.45461 |
| CCL22    | -0.16028 | 0.43326 | -0.32044 | 0.09343 |
| ASPN     | -0.14472 | 0.40932 | -0.60112 | 0.00007 |
| DDX58    | -0.76664 | 0.03809 | 0.54594  | 0.15080 |
| PCDH7    | 0.01736  | 0.89839 | -0.11011 | 0.25997 |
| PPM1B    | -0.13589 | 0.57200 | 0.88591  | 0.00007 |
| DNPH1    | 0.12527  | 0.49944 | 1.74590  | 0.00000 |
| APP      | 0.20077  | 0.28947 | -1.06037 | 0.00000 |
| KHDC3L   | 0.31416  | 0.24250 | -0.52301 | 0.05142 |
| STIP1    | -0.06408 | 0.81138 | 1.70133  | 0.00000 |
| SPINK5   | -0.19900 | 0.05367 | -0.16834 | 0.13821 |
| C1S      | -0.04440 | 0.55759 | -0.19783 | 0.04535 |
| C19orf12 | 0.21838  | 0.51941 | 0.44528  | 0.13061 |
| TWF2     | -0.06937 | 0.83472 | 1.43655  | 0.00000 |
| ATOX1    | -0.01269 | 0.95035 | 0.63825  | 0.00555 |
| CRTAP    | 0.30170  | 0.13473 | 0.61988  | 0.00054 |
| CD99     | -0.07186 | 0.46897 | -0.10700 | 0.35959 |
| MTUS1    | 0.35829  | 0.37733 | 0.74344  | 0.01685 |
| PLXDC1   | -0.25278 | 0.08058 | -0.19219 | 0.16536 |
| PON1     | -0.37689 | 0.00528 | -0.22485 | 0.05857 |
| EFEMP1   | 0.54795  | 0.00241 | 0.18719  | 0.28224 |
| CHGB     | 0.47839  | 0.01781 | 0.35324  | 0.07328 |
| RNF43    | 0.14934  | 0.46317 | -0.05371 | 0.77549 |
| WIF1     | -0.00088 | 0.99446 | -0.04641 | 0.85444 |
| VTA1     | 0.24812  | 0.37929 | 2.07843  | 0.00000 |
| CENPJ    | -0.06661 | 0.85247 | 0.23092  | 0.63288 |
| GDNF     | 0.47876  | 0.01671 | 0.74866  | 0.00024 |
| BIN2     | -0.40469 | 0.30860 | 0.01385  | 0.96968 |
| TCTN3    | 0.07939  | 0.50389 | -0.14749 | 0.18660 |
| TSPYL1   | 0.05901  | 0.74272 | 0.50810  | 0.00122 |

|           |          |         |          |         |
|-----------|----------|---------|----------|---------|
| FAM171B   | 0.12284  | 0.16272 | -0.09232 | 0.34530 |
| FOXO1     | 0.18565  | 0.50889 | 1.29142  | 0.00002 |
| CCL7      | -0.89097 | 0.02011 | -0.10257 | 0.76890 |
| TOMM20    | 0.40287  | 0.14649 | 0.79926  | 0.00082 |
| AMBN      | -0.06676 | 0.58149 | 0.03302  | 0.72568 |
| ERP29     | 0.25247  | 0.52788 | 1.97793  | 0.00000 |
| DNAJB14   | -0.18854 | 0.57010 | 0.62447  | 0.04164 |
| STOML2    | 0.36983  | 0.28507 | 0.01066  | 0.97406 |
| IGDCC4    | -0.29678 | 0.03018 | -0.39003 | 0.00211 |
| OBP2B     | -0.24120 | 0.36427 | -0.45224 | 0.06950 |
| NEFL      | 1.11864  | 0.00257 | 0.80773  | 0.02203 |
| P4HB      | 0.13197  | 0.42105 | 0.27899  | 0.07312 |
| CEP350    | 0.39724  | 0.20435 | 0.04470  | 0.87113 |
| ANKRA2    | 0.50743  | 0.05451 | -0.20119 | 0.47838 |
| TFPI2     | 0.34821  | 0.16458 | 0.72278  | 0.00033 |
| GZMB      | 0.71353  | 0.03833 | 0.44827  | 0.16465 |
| SCN3B     | 0.19608  | 0.30918 | -0.00748 | 0.97243 |
| HRC       | -0.06770 | 0.61227 | 0.02459  | 0.85098 |
| BHMT2     | 0.11655  | 0.49706 | -0.01137 | 0.93316 |
| ITIH4     | 0.23279  | 0.06962 | -0.18128 | 0.10902 |
| OXCT1     | 0.84293  | 0.00361 | 1.56202  | 0.00000 |
| EHD3      | 0.26650  | 0.48574 | 2.18771  | 0.00000 |
| RNASE6    | 0.22830  | 0.12735 | 0.14312  | 0.25366 |
| SFRP1     | 0.44270  | 0.27925 | 1.07549  | 0.01594 |
| ARHGEF1   | -0.13470 | 0.64179 | 0.98543  | 0.00070 |
| IFNW1     | 0.27924  | 0.11329 | 0.09862  | 0.54057 |
| LRIG3     | 0.07531  | 0.44099 | -0.08140 | 0.35745 |
| AMN       | 0.13086  | 0.51153 | 0.12468  | 0.51602 |
| SPINT2    | 0.18247  | 0.23649 | 0.07255  | 0.66555 |
| COL6A3    | 0.26350  | 0.18960 | -0.06614 | 0.74253 |
| CDC27     | 0.54323  | 0.04978 | 0.65712  | 0.01157 |
| APLP1     | -0.39994 | 0.03825 | -0.56391 | 0.00149 |
| SNAP23    | 0.00682  | 0.98268 | 1.10713  | 0.00214 |
| LRFN2     | -0.20776 | 0.24681 | -0.45352 | 0.02183 |
| CNTN1     | -0.22282 | 0.11795 | -0.38102 | 0.01303 |
| CELA2A    | 0.06249  | 0.82636 | -0.20542 | 0.38730 |
| RCC1      | 0.08125  | 0.79262 | 0.64160  | 0.02712 |
| HSD17B14  | 0.54242  | 0.08863 | 0.60757  | 0.05197 |
| TMEM25    | -0.14327 | 0.38157 | -0.00922 | 0.95535 |
| CD58      | -0.08392 | 0.34314 | -0.11762 | 0.29971 |
| GATA3     | 0.34344  | 0.02449 | -0.07066 | 0.69665 |
| TNFRSF11B | 0.31572  | 0.04877 | 0.30360  | 0.07944 |
| MDK       | 0.91781  | 0.01313 | 0.91909  | 0.00969 |
| GAMT      | 0.09159  | 0.44420 | 0.31851  | 0.01084 |
| IST1      | 0.08654  | 0.76798 | 1.06519  | 0.00042 |
| PARD3     | 0.49962  | 0.22572 | 1.96204  | 0.00008 |
| EPO       | 0.68912  | 0.16656 | 0.59216  | 0.17600 |
| NPY       | -0.42433 | 0.06259 | 0.45974  | 0.10851 |

|                 |          |         |          |         |
|-----------------|----------|---------|----------|---------|
| PRSS27          | -0.04622 | 0.74387 | -0.38462 | 0.00976 |
| UPB1            | 0.06489  | 0.89115 | 1.06801  | 0.01227 |
| TGOLN2          | 0.16574  | 0.12666 | 0.09520  | 0.35810 |
| CCER2           | 0.20914  | 0.31600 | -0.37021 | 0.05010 |
| CST6            | -0.13222 | 0.46174 | -0.60719 | 0.00113 |
| KLK7            | -0.51589 | 0.01180 | -0.53190 | 0.00985 |
| PYDC1           | 0.03177  | 0.82693 | 0.04258  | 0.77749 |
| NUMB            | -0.14182 | 0.61710 | 1.80477  | 0.00000 |
| IGFBPL1         | 0.30193  | 0.15014 | 0.05123  | 0.75306 |
| TFF3            | 0.72294  | 0.00275 | 0.36972  | 0.04431 |
| MNAT1           | -0.04834 | 0.81734 | 0.14495  | 0.55666 |
| ABL1            | 0.00422  | 0.98800 | 0.49722  | 0.07770 |
| C3              | -0.23721 | 0.19018 | -1.40835 | 0.00000 |
| SPACA5B; SPACA5 | 0.25110  | 0.09641 | -0.03324 | 0.76671 |
| FAS             | 0.31956  | 0.02227 | -0.13261 | 0.37867 |
| CSF3R           | -0.03447 | 0.82675 | -0.31207 | 0.01118 |
| NUDT15          | 0.09507  | 0.74369 | 0.42936  | 0.03788 |
| ERN1            | -0.14607 | 0.29683 | -0.24014 | 0.04856 |
| BAX             | 0.00924  | 0.98333 | 1.30981  | 0.00143 |
| TYMP            | 0.12366  | 0.58438 | 0.63934  | 0.00724 |
| NLGN1           | 0.00008  | 0.99975 | 0.08071  | 0.78163 |
| OGFR            | 0.10413  | 0.55699 | 0.17177  | 0.42879 |
| CD7             | 0.24395  | 0.11028 | 0.10739  | 0.44938 |
| WFDC2           | 0.81665  | 0.00211 | 0.28034  | 0.24722 |
| KCNIP4          | -0.40990 | 0.06973 | -0.64822 | 0.00465 |
| MLN             | 0.94418  | 0.00422 | 0.28444  | 0.35695 |
| VASP            | 0.08890  | 0.76724 | 1.91633  | 0.00000 |
| ZNRF4           | 0.50329  | 0.02199 | 0.69673  | 0.00015 |
| TTF2            | -0.03910 | 0.90161 | 0.59222  | 0.05931 |
| HBEGF           | 0.09283  | 0.71828 | -0.76185 | 0.01215 |
| CDNF            | -0.20266 | 0.17207 | -0.18331 | 0.25494 |
| TIGIT           | 0.53926  | 0.01204 | 0.25538  | 0.16405 |
| LIPF            | -0.14446 | 0.50882 | -0.59343 | 0.01273 |
| MANSC1          | 0.29317  | 0.02428 | 0.00379  | 0.97512 |
| FCN1            | 0.31531  | 0.11819 | 0.59224  | 0.00027 |
| PPM1F           | 0.00270  | 0.98946 | 1.16186  | 0.00000 |
| RGS10           | 0.15861  | 0.55566 | 1.00622  | 0.00057 |
| AKR1B1          | -0.00428 | 0.98568 | 1.70664  | 0.00000 |
| ST6GAL1         | 0.20236  | 0.17471 | -0.35036 | 0.02263 |
| SUOX            | 0.38054  | 0.22999 | 1.04316  | 0.00078 |
| PBXIP1          | -0.31728 | 0.01605 | 0.11580  | 0.35104 |
| ANG             | -0.09302 | 0.58848 | 0.04890  | 0.76443 |
| IL3             | 0.85185  | 0.04917 | 0.18340  | 0.65801 |
| ENTR1           | 0.02484  | 0.91336 | 0.41105  | 0.06413 |
| GAD1            | 0.15872  | 0.28520 | -0.10367 | 0.45322 |
| MYBPC1          | 0.06392  | 0.87405 | 0.49709  | 0.18274 |
| TPSG1           | -0.10105 | 0.66161 | 0.18112  | 0.36987 |
| BDNF            | -0.03961 | 0.88679 | -0.86815 | 0.00069 |



|                |          |         |          |         |
|----------------|----------|---------|----------|---------|
| NFKB1          | 0.11694  | 0.65458 | 0.19631  | 0.40186 |
| CNP            | 0.01383  | 0.95449 | 1.84812  | 0.00000 |
| FGF2           | 0.28012  | 0.28135 | 0.44875  | 0.02852 |
| DBNL           | -0.27665 | 0.36807 | 0.84117  | 0.00622 |
| SLC27A4        | 0.15692  | 0.66147 | -0.25658 | 0.44095 |
| SERPINA3       | 0.27681  | 0.02438 | 0.12890  | 0.28713 |
| SH3BP1         | -0.91589 | 0.01381 | -0.05012 | 0.90353 |
| METAP2         | 0.11321  | 0.55012 | 1.02568  | 0.00011 |
| VSIG10L        | 0.11059  | 0.55275 | -0.17798 | 0.22475 |
| SERPINA4       | -0.24817 | 0.12321 | -0.20330 | 0.15988 |
| CLEC4D         | 0.75430  | 0.01860 | 0.09541  | 0.76170 |
| BECN1          | 0.19057  | 0.47562 | 1.24022  | 0.00000 |
| GAS6           | 0.17537  | 0.20650 | -0.06160 | 0.69217 |
| TPPP3          | -0.03489 | 0.89103 | 0.14800  | 0.54948 |
| DOCK9          | -0.67457 | 0.06483 | -0.09121 | 0.77507 |
| CA1            | 0.08997  | 0.68138 | 1.72926  | 0.00000 |
| MB             | -0.40812 | 0.18381 | 0.58278  | 0.07162 |
| RP2            | -0.25032 | 0.18754 | 0.11178  | 0.52764 |
| KIR3DL1        | -0.15849 | 0.80059 | 0.17491  | 0.78143 |
| TDP1           | -0.20449 | 0.61072 | 0.50041  | 0.22811 |
| CBS            | 0.18433  | 0.65819 | 0.67700  | 0.06068 |
| GAD2           | -0.08116 | 0.66928 | -0.03084 | 0.85609 |
| ADAM15         | 0.20296  | 0.08340 | -0.16117 | 0.30604 |
| CALB1          | 0.53308  | 0.05973 | 0.17571  | 0.58382 |
| USP28          | 0.55558  | 0.03858 | 0.73353  | 0.00223 |
| NUDC           | 0.06128  | 0.75045 | 1.33073  | 0.00000 |
| LGALS3         | 0.31448  | 0.06040 | 0.37322  | 0.00995 |
| GP1BB          | 0.45911  | 0.10098 | -1.00158 | 0.00040 |
| RBKS           | -0.19596 | 0.50249 | 1.13825  | 0.00011 |
| STX6           | 0.07369  | 0.79447 | 0.90771  | 0.00069 |
| DEFB4A; DEFB4B | 0.68905  | 0.11892 | -1.22363 | 0.00592 |
| TEK            | -0.02964 | 0.77424 | -0.02157 | 0.84145 |
| COL3A1         | 0.00823  | 0.96440 | -0.14217 | 0.41209 |
| ATXN2          | 0.54402  | 0.10348 | 0.89254  | 0.00730 |
| IL17D          | 0.14969  | 0.27864 | 0.25985  | 0.04731 |
| ANXA4          | -0.32278 | 0.34291 | 0.96062  | 0.00296 |
| LXN            | 0.15868  | 0.52717 | 0.58603  | 0.01996 |
| EXOSC10        | 0.03382  | 0.86122 | 0.08575  | 0.64441 |
| ERCC1          | -0.03982 | 0.89955 | -0.05977 | 0.85408 |
| ASAH1          | -0.04780 | 0.79659 | -0.42559 | 0.01410 |
| HRAS           | -0.40333 | 0.21692 | -0.62901 | 0.07423 |
| TIMP3          | 0.94745  | 0.01545 | -0.44828 | 0.23206 |
| PDGFC          | 0.04130  | 0.72390 | -0.00537 | 0.96419 |
| GC             | -0.05524 | 0.59813 | -0.17902 | 0.10482 |
| SMS            | -0.28853 | 0.32809 | 0.86626  | 0.00498 |
| TPMT           | -0.38936 | 0.21992 | 0.68141  | 0.03145 |
| SRC            | 0.16172  | 0.69014 | 1.13237  | 0.00541 |
| NCR3LG1        | 0.58387  | 0.01176 | 0.33445  | 0.09264 |

|          |          |         |          |         |
|----------|----------|---------|----------|---------|
| TIMM10   | 0.28786  | 0.15963 | 0.56474  | 0.00011 |
| PDIA5    | -0.15855 | 0.59177 | -0.12381 | 0.62249 |
| CCL16    | 0.40812  | 0.02922 | 0.12202  | 0.55501 |
| ARHGAP1  | 0.02247  | 0.88122 | 1.22171  | 0.00000 |
| RAD23B   | 0.05292  | 0.72481 | 0.84442  | 0.00001 |
| RAB39B   | -0.57057 | 0.03650 | 0.53281  | 0.05023 |
| CPTP     | -0.03469 | 0.84837 | 0.30594  | 0.07648 |
| CADPS    | -0.12601 | 0.70471 | -0.55362 | 0.12591 |
| MESD     | 0.54220  | 0.21967 | 1.92242  | 0.00002 |
| CTSO     | -0.02684 | 0.80295 | 0.09078  | 0.57123 |
| MAPRE3   | 0.66209  | 0.06714 | 0.13879  | 0.66332 |
| EIF4G3   | 0.12675  | 0.75787 | 0.50784  | 0.13992 |
| C1QL2    | -0.21499 | 0.23220 | -0.67757 | 0.00017 |
| ENAH     | 0.37862  | 0.09030 | 0.23792  | 0.26917 |
| PTX3     | 0.62599  | 0.00068 | 0.79355  | 0.00034 |
| S100A11  | 0.16588  | 0.57278 | 0.87643  | 0.00211 |
| PGD      | -0.13429 | 0.62549 | 0.76643  | 0.00311 |
| SHMT1    | 0.08574  | 0.79227 | 2.18725  | 0.00000 |
| MIF      | -0.17747 | 0.51787 | 1.75815  | 0.00000 |
| AIFM1    | 0.63629  | 0.15662 | 2.93446  | 0.00000 |
| CD164    | -0.02457 | 0.87413 | -0.24052 | 0.08146 |
| SERPINA9 | -0.49575 | 0.07102 | -0.30178 | 0.26631 |
| PRDX2    | 0.05714  | 0.80704 | 1.58259  | 0.00000 |
| PPP3R1   | -0.28870 | 0.11084 | 0.08692  | 0.65594 |
| IL18     | 0.23651  | 0.46212 | 0.58467  | 0.02730 |
| FOXJ3    | -0.26942 | 0.31288 | 0.57139  | 0.04216 |
| INHBC    | 0.10998  | 0.50496 | -0.03049 | 0.85380 |
| BTC      | 0.06342  | 0.83739 | -0.58490 | 0.02354 |
| PROK1    | -0.17169 | 0.40531 | 0.07674  | 0.75666 |
| ISM2     | 0.35130  | 0.06469 | 0.18416  | 0.19159 |
| AIDA     | -0.05249 | 0.86213 | 0.77846  | 0.00682 |
| SMNDC1   | 0.49460  | 0.32089 | 0.91223  | 0.04398 |
| SIGLEC9  | 0.15700  | 0.22130 | -0.06136 | 0.74178 |
| IFNG     | 0.52594  | 0.23130 | 0.07040  | 0.87852 |
| SDCCAG8  | -0.29547 | 0.42360 | 0.03283  | 0.92454 |
| OGN      | 0.51154  | 0.01508 | 0.12300  | 0.58085 |
| PSAP     | 0.21841  | 0.06851 | 0.08047  | 0.49418 |
| SPON2    | 0.33309  | 0.07125 | -0.03958 | 0.82732 |
| ITGB1BP2 | 0.41290  | 0.29108 | 3.06483  | 0.00000 |
| CXCL9    | 0.76728  | 0.00206 | 0.23421  | 0.36909 |
| TNFSF11  | -0.78179 | 0.00923 | -0.94932 | 0.00159 |
| MINDY1   | -0.17714 | 0.60596 | 0.21717  | 0.50230 |
| ENTPD6   | 0.00456  | 0.96329 | -0.11891 | 0.19748 |
| DKK1     | 0.37999  | 0.03731 | -0.57354 | 0.00151 |
| EGFL7    | 0.37743  | 0.01028 | -0.29409 | 0.10008 |
| IL1R1    | 0.27612  | 0.01461 | 0.01489  | 0.90809 |
| CLEC1A   | 0.20088  | 0.20152 | -0.02605 | 0.87479 |
| WFIKN2   | 0.08855  | 0.49042 | -0.15993 | 0.28461 |

|           |          |         |          |         |
|-----------|----------|---------|----------|---------|
| KIRREL1   | -0.00675 | 0.97544 | -0.01372 | 0.96339 |
| DTNB      | 0.15289  | 0.52384 | 0.71622  | 0.00555 |
| HDGFL2    | 0.12314  | 0.71106 | 1.28788  | 0.00005 |
| SYAP1     | 0.16885  | 0.54504 | 0.67003  | 0.00240 |
| IL10RB    | 0.16305  | 0.17311 | 0.06128  | 0.67095 |
| GPKOW     | 0.15633  | 0.52713 | 0.30316  | 0.17961 |
| GFRA1     | 0.41453  | 0.02129 | 0.33721  | 0.15929 |
| SHPK      | 0.14987  | 0.50478 | 0.56637  | 0.02838 |
| FABP6     | 0.12843  | 0.62102 | 0.03927  | 0.84619 |
| CDCP1     | 0.70677  | 0.00314 | 0.35662  | 0.13827 |
| DMP1      | -0.30702 | 0.21144 | 0.57737  | 0.02017 |
| PIIB      | 0.04859  | 0.87990 | 0.15926  | 0.57919 |
| S100A13   | 0.31314  | 0.07498 | -0.16748 | 0.27325 |
| CLEC6A    | 0.61886  | 0.00624 | -0.17513 | 0.41921 |
| GOLGA3    | 0.62091  | 0.01452 | 1.11898  | 0.00001 |
| TGFBI     | 0.02286  | 0.84994 | -0.11698 | 0.37029 |
| IFNL1     | 0.38930  | 0.16220 | 0.28154  | 0.40440 |
| IL1RAP    | 0.04901  | 0.70057 | 0.01674  | 0.91059 |
| DUT       | 0.90568  | 0.01542 | 0.24930  | 0.45650 |
| SLC28A1   | -0.05935 | 0.81297 | 0.17817  | 0.47264 |
| TG        | 0.37757  | 0.23883 | 0.11930  | 0.74955 |
| NMNAT1    | -0.13402 | 0.75085 | 0.34301  | 0.42156 |
| TLR4      | 0.14181  | 0.26736 | -0.02370 | 0.84059 |
| CDH1      | 0.42908  | 0.00384 | -0.48189 | 0.00196 |
| CNTF      | -0.16652 | 0.71196 | -0.33282 | 0.47503 |
| DLK1      | -0.00543 | 0.97775 | -0.23850 | 0.16058 |
| SLMAP     | 0.36019  | 0.23942 | 0.35092  | 0.23189 |
| ADA       | -0.20643 | 0.25206 | 0.52559  | 0.01567 |
| TXNDC15   | 0.29698  | 0.00979 | -0.01249 | 0.92191 |
| CA8       | 0.05958  | 0.66440 | -0.10881 | 0.20472 |
| AFP       | 0.18610  | 0.50608 | 0.04613  | 0.84806 |
| PMM2      | 1.00602  | 0.00708 | 0.86573  | 0.00514 |
| DPP4      | -0.31897 | 0.01768 | -0.28198 | 0.05549 |
| BLNK      | 0.31949  | 0.06131 | 0.77768  | 0.00064 |
| CSF2RB    | -0.35459 | 0.05539 | -0.15166 | 0.39511 |
| COMP      | -0.37630 | 0.03817 | -0.73468 | 0.00029 |
| TMPRSS11D | 0.30067  | 0.11296 | -0.13828 | 0.31733 |
| STK24     | -0.11207 | 0.65807 | 0.50713  | 0.04189 |
| HS3ST3B1  | 0.11047  | 0.51696 | 0.04869  | 0.83950 |
| AARSD1    | 0.31625  | 0.17740 | 1.34445  | 0.00000 |
| TSPAN15   | 0.15217  | 0.52532 | 0.02902  | 0.91675 |
| FIS1      | -0.20709 | 0.49986 | 0.51453  | 0.07009 |
| ADAMTSL5  | -0.11608 | 0.43276 | -0.14811 | 0.28037 |
| FGFR4     | 0.02440  | 0.87680 | -0.26854 | 0.10605 |
| IVD       | 0.40664  | 0.21854 | 0.31375  | 0.32396 |
| PCDHB15   | -0.08505 | 0.64570 | -0.72341 | 0.00001 |
| SNX18     | -0.05464 | 0.72515 | 0.29390  | 0.05136 |
| FCAMR     | 0.32588  | 0.23897 | 0.19277  | 0.42568 |

|         |          |         |          |         |
|---------|----------|---------|----------|---------|
| HAVCR1  | 0.89446  | 0.00616 | 0.64746  | 0.06497 |
| IL2RG   | 0.25967  | 0.08207 | 0.07839  | 0.55457 |
| SESTD1  | -0.29928 | 0.28054 | -0.24969 | 0.28781 |
| TGFA    | 1.01247  | 0.00066 | -0.20542 | 0.48278 |
| CFH     | 0.01467  | 0.86357 | 0.00064  | 0.99390 |
| GNLY    | 0.25091  | 0.21103 | 0.07572  | 0.68192 |
| IMMT    | 0.73060  | 0.00868 | 0.79453  | 0.00171 |
| MENT    | -0.26439 | 0.01287 | -0.22439 | 0.04875 |
| PRKRA   | 0.06017  | 0.81319 | 0.56407  | 0.02427 |
| PGA4    | -0.37464 | 0.31490 | -0.35291 | 0.20743 |
| ADAM9   | 0.17420  | 0.23499 | 0.05660  | 0.68930 |
| NAMPT   | -0.24715 | 0.51711 | 0.96284  | 0.02099 |
| EPB41L5 | 0.13006  | 0.70893 | 0.25586  | 0.39691 |
| MMP13   | -0.00806 | 0.97792 | -0.75224 | 0.03281 |
| DNAJA4  | -0.04308 | 0.83709 | 1.23135  | 0.00000 |
| B4GALT1 | 0.17024  | 0.21313 | 0.18393  | 0.24094 |
| ATP2B4  | 0.54655  | 0.05774 | -0.10225 | 0.74903 |
| CNTN4   | -0.08983 | 0.36164 | -0.24997 | 0.02774 |
| NADK    | -0.02855 | 0.93734 | 0.50470  | 0.16158 |
| ACADM   | 1.01600  | 0.00701 | -0.11596 | 0.75422 |
| NAA10   | -0.13342 | 0.65990 | 0.43043  | 0.13963 |
| PKLR    | 0.21545  | 0.38312 | 1.56415  | 0.00000 |
| SIT1    | 0.58660  | 0.02531 | 0.96072  | 0.00023 |
| WASHC3  | -0.25708 | 0.46067 | 1.15110  | 0.00103 |
| NDST1   | -0.14438 | 0.52063 | -0.38786 | 0.07724 |
| LAMA1   | -0.08653 | 0.68277 | -0.02555 | 0.90563 |
| BCR     | 0.31256  | 0.27184 | 1.31418  | 0.00000 |
| MRPL58  | 0.39877  | 0.28190 | 1.17590  | 0.00061 |
| IGFBP3  | -0.51220 | 0.00633 | -0.48720 | 0.01420 |
| PLCB2   | 0.04463  | 0.90786 | 1.78238  | 0.00001 |
| TBL1X   | 0.03567  | 0.89848 | 1.13477  | 0.00015 |
| COL9A2  | 0.04519  | 0.86300 | -0.40009 | 0.27337 |
| LBP     | 0.26053  | 0.30077 | 0.13217  | 0.57272 |
| SLITRK2 | -0.02077 | 0.90864 | -0.18170 | 0.37476 |
| RYR1    | -0.24289 | 0.25217 | -0.09214 | 0.62212 |
| ARG1    | -0.14591 | 0.57410 | 0.82009  | 0.00149 |
| SIGLEC6 | -0.21027 | 0.16005 | -0.28832 | 0.19777 |
| CLNS1A  | 0.08252  | 0.68646 | 0.54978  | 0.00823 |
| MANSC4  | 0.41290  | 0.17603 | -0.32592 | 0.25066 |
| MSMB    | 0.22024  | 0.37982 | -0.07830 | 0.72633 |
| TBCA    | -0.15289 | 0.62918 | 1.77952  | 0.00000 |
| DDAH1   | 0.00222  | 0.99456 | 0.92042  | 0.00241 |
| TRAF2   | -0.47704 | 0.01918 | 0.46547  | 0.03104 |
| NEO1    | -0.09033 | 0.19292 | -0.04688 | 0.43981 |
| OXT     | -0.02697 | 0.94100 | 0.41543  | 0.21760 |
| C1QBP   | 0.54520  | 0.04433 | 0.68002  | 0.00080 |
| DOK2    | 0.38359  | 0.33861 | 0.61254  | 0.11279 |
| NPTX1   | 0.14609  | 0.41643 | 0.12484  | 0.43260 |

|          |          |         |          |         |
|----------|----------|---------|----------|---------|
| ARHGEF10 | 0.52462  | 0.09022 | 0.54783  | 0.05007 |
| PLA2G4A  | 0.34598  | 0.26980 | 1.77765  | 0.00000 |
| RNASET2  | 0.11976  | 0.33332 | -0.14858 | 0.23785 |
| NUCB2    | 0.09499  | 0.49759 | 0.02688  | 0.88718 |
| ART3     | -0.01030 | 0.94331 | -0.18076 | 0.23608 |
| GRSF1    | 0.81547  | 0.03609 | 1.92466  | 0.00000 |
| RNASE10  | 0.31805  | 0.17273 | -0.05671 | 0.79521 |
| THRAP3   | -0.04766 | 0.90724 | 0.13546  | 0.69626 |
| IL5      | -0.39506 | 0.43456 | -0.62205 | 0.16667 |
| TRIM21   | -0.73306 | 0.01012 | 0.75433  | 0.02140 |
| MYOM1    | 0.08417  | 0.67524 | 0.20479  | 0.31056 |
| PDE5A    | 0.25901  | 0.41605 | 1.85651  | 0.00000 |
| ERVV-1   | 0.31044  | 0.20154 | -0.10694 | 0.59471 |
| LTB      | -0.18294 | 0.27423 | -0.22598 | 0.27260 |
| GSR      | 0.17108  | 0.25957 | 0.29124  | 0.00752 |
| CSF1     | 0.38884  | 0.03268 | 0.30096  | 0.09811 |
| CLGN     | 0.23900  | 0.31384 | 0.19266  | 0.33899 |
| SCN2B    | 0.16722  | 0.32365 | 0.19891  | 0.29015 |
| FMNL1    | -0.25178 | 0.52168 | 0.16389  | 0.69960 |
| SORCS2   | 0.44165  | 0.01857 | 0.32320  | 0.15217 |
| CHI3L1   | 0.80934  | 0.03589 | 0.59391  | 0.10834 |
| PDZK1    | 0.20530  | 0.62077 | 0.52406  | 0.16193 |
| TTR      | -0.48195 | 0.00995 | -0.41340 | 0.01721 |
| CALCA    | -0.09842 | 0.82370 | 0.48649  | 0.28236 |
| EFNB2    | 0.39877  | 0.10545 | 0.05654  | 0.80795 |
| AMY2A    | -0.02523 | 0.90218 | -0.27894 | 0.14582 |
| PSMG4    | 0.16930  | 0.48263 | 1.96395  | 0.00000 |
| PTPRR    | 0.00184  | 0.99028 | -0.13950 | 0.28377 |
| SLA2     | 0.32747  | 0.38333 | 2.74764  | 0.00000 |
| FABP5    | -0.03665 | 0.90812 | 1.49661  | 0.00001 |
| TIA1     | 0.18243  | 0.69065 | 2.60324  | 0.00000 |
| EPHA1    | 0.31626  | 0.01313 | 0.19309  | 0.16669 |
| MANF     | 0.21820  | 0.54814 | 0.96675  | 0.00824 |
| DMD      | 0.32483  | 0.22734 | 0.66679  | 0.01284 |
| CR1      | 0.01046  | 0.94273 | -0.10188 | 0.48054 |
| CPXM1    | 0.36108  | 0.05848 | -1.20023 | 0.00000 |
| PLAU     | -0.17233 | 0.19584 | -0.14066 | 0.30767 |
| MEGF11   | 0.04601  | 0.72143 | -0.31279 | 0.05871 |
| S100A4   | -0.40074 | 0.09145 | 0.32382  | 0.10458 |
| ATP6V1F  | -0.36397 | 0.18176 | -0.25705 | 0.32709 |
| CCL19    | -0.45456 | 0.09814 | -0.31803 | 0.25291 |
| INSL5    | 0.49594  | 0.09249 | 0.50858  | 0.10436 |
| MMP8     | 1.17010  | 0.02000 | -0.36667 | 0.43534 |
| PDE4D    | -0.19676 | 0.53978 | 0.21008  | 0.54009 |
| MDM1     | -0.34593 | 0.20853 | 0.60350  | 0.04957 |
| CCL17    | 0.19928  | 0.51171 | -1.09445 | 0.00003 |
| EPS8L2   | 0.32750  | 0.21112 | 0.49441  | 0.04542 |
| ST13     | 0.16221  | 0.42287 | 1.70615  | 0.00000 |

|          |          |         |          |         |
|----------|----------|---------|----------|---------|
| TXLNA    | 0.26285  | 0.35437 | 1.39422  | 0.00000 |
| PLA2G2A  | -0.02854 | 0.94270 | 0.15189  | 0.64874 |
| FASLG    | -0.10756 | 0.44660 | -0.23160 | 0.25407 |
| TACSTD2  | 0.11282  | 0.50111 | -0.14672 | 0.42018 |
| CLIC5    | 0.45748  | 0.01441 | 0.13355  | 0.45468 |
| TNC      | 0.14084  | 0.52422 | 0.21003  | 0.33647 |
| ENTPD5   | -0.15421 | 0.07046 | -0.08565 | 0.39358 |
| MRPL28   | 0.20062  | 0.11239 | 0.04934  | 0.59860 |
| CDC42BPB | 0.44658  | 0.16832 | 0.73067  | 0.01316 |
| SCN4B    | -0.27150 | 0.16111 | -0.39502 | 0.02175 |
| MDH1     | 0.03030  | 0.49270 | 0.03913  | 0.47428 |
| TBC1D17  | -0.00447 | 0.97981 | 0.49446  | 0.00200 |
| IGF2R    | 0.17170  | 0.07545 | 0.09745  | 0.35030 |
| CST3     | 0.22159  | 0.12565 | -0.01658 | 0.91235 |
| VPS53    | -0.07755 | 0.76523 | 0.73578  | 0.00224 |
| SUSD2    | 0.10046  | 0.37696 | -0.21734 | 0.10222 |
| PTP4A3   | 0.19368  | 0.23891 | 0.65256  | 0.00001 |
| GSTM4    | -0.01738 | 0.95703 | -0.17902 | 0.56596 |
| FN1      | -0.01318 | 0.91888 | 0.55874  | 0.00008 |
| DNER     | -0.41028 | 0.00143 | -0.37561 | 0.00368 |
| TNFSF9   | 0.28334  | 0.12619 | -0.07494 | 0.64029 |
| TPBGL    | -0.06164 | 0.73087 | -0.08700 | 0.64013 |
| NIT2     | -0.20638 | 0.53628 | 1.78592  | 0.00000 |
| MATN3    | -0.04947 | 0.85472 | 0.09945  | 0.72549 |
| EIF2AK3  | 0.06314  | 0.85122 | 0.41408  | 0.14634 |
| GP6      | 0.14273  | 0.54235 | -0.55294 | 0.02104 |
| LUZP2    | 0.30556  | 0.01847 | 0.07162  | 0.55027 |
| CLPS     | 0.22321  | 0.48299 | -0.01240 | 0.96379 |
| PLAT     | 0.22590  | 0.33669 | 0.52913  | 0.04428 |
| GSTA3    | -0.14743 | 0.68230 | 0.64195  | 0.05232 |
| NRCAM    | 0.14487  | 0.37170 | -0.15349 | 0.26536 |
| AGXT     | 0.25144  | 0.50908 | 1.17207  | 0.00019 |
| RILPL2   | -0.08412 | 0.79337 | 1.76877  | 0.00000 |
| CFB      | 0.16570  | 0.20577 | 0.15440  | 0.20612 |
| LSM8     | 0.16272  | 0.62792 | -0.16764 | 0.62820 |
| ANGPTL3  | 0.09725  | 0.41496 | -0.10923 | 0.45919 |
| TNFSF13  | 0.42288  | 0.01179 | 0.23318  | 0.20793 |
| SPAG1    | -0.25220 | 0.34151 | 0.44216  | 0.09686 |
| OLR1     | 0.79773  | 0.04811 | -0.48206 | 0.21983 |
| TSLP     | -0.16102 | 0.42418 | -0.14425 | 0.59322 |
| PDRG1    | -0.20233 | 0.50586 | 0.57955  | 0.04263 |
| DRG2     | -0.30021 | 0.14423 | 0.33999  | 0.07940 |
| ZP3      | 0.42913  | 0.49066 | 0.24454  | 0.66719 |
| CRYZL1   | 0.26591  | 0.34641 | 2.08134  | 0.00000 |
| AXL      | 0.15008  | 0.21356 | 0.18353  | 0.16567 |
| MAP3K5   | -0.40545 | 0.29986 | -1.64218 | 0.00001 |
| CRIM1    | 0.20290  | 0.12456 | 0.17839  | 0.18668 |
| PREB     | 0.34380  | 0.02882 | 0.43544  | 0.00359 |

|                 |          |         |          |         |
|-----------------|----------|---------|----------|---------|
| SCGB3A1         | 0.01209  | 0.93131 | -0.22211 | 0.08893 |
| NRN1            | 0.22557  | 0.13608 | -0.19846 | 0.25614 |
| SMOC1           | 0.62690  | 0.00961 | 0.20478  | 0.47787 |
| KYAT1           | -0.20759 | 0.44162 | 1.18047  | 0.00001 |
| PRDX3           | 0.43678  | 0.17444 | 1.47522  | 0.00000 |
| CASP2           | -0.48148 | 0.05766 | -1.04347 | 0.00002 |
| PLTP            | 0.05044  | 0.74065 | -0.68214 | 0.00004 |
| GLT8D2          | 0.01523  | 0.93914 | -0.07241 | 0.66110 |
| NAAA            | -0.08421 | 0.72028 | -0.06061 | 0.78791 |
| MFAP5           | 0.14729  | 0.50599 | -0.60231 | 0.00390 |
| LGALS7B; LGALS7 | 0.28983  | 0.12989 | 0.16310  | 0.36120 |
| WFDC1           | 0.04519  | 0.71867 | 0.33883  | 0.01618 |
| LRRFIP1         | 0.06755  | 0.78910 | 0.02803  | 0.91742 |
| PLEKHO1         | 0.49961  | 0.10946 | 1.76432  | 0.00000 |
| LYPD8           | 0.20655  | 0.35388 | 0.02896  | 0.90222 |
| TMED10          | -0.11237 | 0.67404 | 0.10401  | 0.73358 |
| NUDT10          | -0.21327 | 0.18073 | -0.02370 | 0.87484 |
| AAMDC           | -0.05077 | 0.78319 | 0.34852  | 0.05476 |
| BHLHE40         | 0.10492  | 0.80545 | -0.75112 | 0.07873 |
| ANP32C          | -0.05770 | 0.51648 | -0.40704 | 0.00578 |
| COL9A1          | -0.60595 | 0.00043 | -0.10679 | 0.62564 |
| SMPD3           | 0.41696  | 0.14413 | 0.33143  | 0.15891 |
| GKN1            | -0.10451 | 0.51033 | -0.09208 | 0.52103 |
| ADGRE2          | -0.08567 | 0.47891 | -0.20053 | 0.13964 |
| POF1B           | 0.92148  | 0.00110 | 0.17773  | 0.43396 |
| CD1C            | -0.30425 | 0.04516 | -0.28170 | 0.04543 |
| GLP1R           | 0.67735  | 0.00713 | -0.26798 | 0.27055 |
| RASSF2          | -0.13867 | 0.74505 | 0.45543  | 0.26322 |
| PBK             | -0.00974 | 0.94155 | -0.07609 | 0.51094 |
| GNGT1           | 0.14314  | 0.54220 | -0.41173 | 0.09030 |
| MAMDC2          | 0.23691  | 0.30027 | 1.55560  | 0.00000 |
| GPNMB           | 0.13988  | 0.21152 | -0.07210 | 0.60687 |
| SEPTIN3         | 0.09376  | 0.71530 | 0.28988  | 0.22041 |
| BLMH            | 0.24292  | 0.18785 | 0.36489  | 0.01747 |
| KDM3A           | 0.01765  | 0.91429 | -0.49736 | 0.00567 |
| L1CAM           | -0.14613 | 0.30103 | -0.29438 | 0.02335 |
| DCUN1D2         | -0.06608 | 0.86133 | 0.19001  | 0.54558 |
| PSTPIP2         | -0.06572 | 0.83938 | 1.52152  | 0.00001 |
| DOC2B           | -0.21455 | 0.58348 | 0.51626  | 0.12768 |
| DSG4            | -0.51331 | 0.00325 | -1.05266 | 0.00000 |
| KLB             | 0.01465  | 0.94550 | -0.30806 | 0.13534 |
| HDDC2           | -0.05614 | 0.73499 | 0.72970  | 0.00000 |
| CARHSP1         | 0.05768  | 0.74184 | 1.64064  | 0.00000 |
| KIAA0319        | 0.29788  | 0.06141 | -0.06026 | 0.60586 |
| PPP1R14A        | 0.13669  | 0.53714 | 1.05354  | 0.00010 |
| REG4            | 0.60142  | 0.00235 | 0.18082  | 0.38200 |
| IL20RA          | 0.02226  | 0.91283 | 0.01814  | 0.91294 |
| MYH9            | 0.34779  | 0.33212 | -0.01369 | 0.96308 |

|           |          |         |          |         |
|-----------|----------|---------|----------|---------|
| KIAA1549  | 0.78611  | 0.20379 | 0.68600  | 0.25356 |
| CKAP4     | 0.46142  | 0.04938 | 0.23021  | 0.41090 |
| KHK       | 0.04393  | 0.88329 | 1.19298  | 0.00004 |
| NOP56     | 0.37832  | 0.32442 | -0.25286 | 0.41926 |
| CD163     | 0.25626  | 0.18102 | 0.25506  | 0.18691 |
| GRHPR     | 0.10029  | 0.75175 | 2.37118  | 0.00000 |
| REG3A     | 1.00889  | 0.00011 | 0.40666  | 0.12861 |
| MDGA1     | -0.44929 | 0.07273 | -0.43545 | 0.09919 |
| GPA33     | -0.46079 | 0.19246 | -0.65644 | 0.10770 |
| CAPS      | 0.32797  | 0.29106 | 1.16008  | 0.00000 |
| GHRL      | -0.11049 | 0.75271 | -0.39835 | 0.29620 |
| CD59      | 0.19934  | 0.18540 | 0.12088  | 0.41095 |
| SCLY      | 0.16317  | 0.51367 | 0.96658  | 0.00133 |
| MITD1     | 0.22743  | 0.49910 | 1.64738  | 0.00000 |
| LAMP3     | 0.28907  | 0.12909 | -0.14188 | 0.56833 |
| PEPD      | -0.06390 | 0.61264 | -0.19806 | 0.06343 |
| MYOM3     | -0.37320 | 0.20196 | -0.19407 | 0.43797 |
| SPRED2    | 0.00409  | 0.97164 | -0.00458 | 0.95653 |
| SCN2A     | 0.08797  | 0.79117 | 0.77811  | 0.01444 |
| BCL7B     | 0.14086  | 0.42010 | -0.13444 | 0.40990 |
| FAP       | -0.15244 | 0.21887 | -0.25148 | 0.04950 |
| CD300C    | 0.30999  | 0.04867 | 0.18082  | 0.28393 |
| NOTCH1    | -0.04583 | 0.50266 | -0.21388 | 0.03957 |
| GGH       | -0.06935 | 0.60294 | 0.00532  | 0.96832 |
| PTPRC     | -0.01143 | 0.91015 | -0.07607 | 0.43824 |
| CORO6     | -0.31037 | 0.07982 | -0.20258 | 0.21296 |
| UBQLN3    | -0.11516 | 0.69531 | -0.20112 | 0.44345 |
| CCL11     | 0.37872  | 0.00592 | -0.19920 | 0.39636 |
| RSPO3     | 0.39240  | 0.04154 | 0.46226  | 0.06056 |
| RRAS      | 0.50198  | 0.30059 | 2.47476  | 0.00000 |
| CCL23     | 0.42585  | 0.05002 | 0.24395  | 0.22615 |
| APPL2     | -0.33843 | 0.34786 | 0.36724  | 0.27219 |
| PHACTR2   | -0.24387 | 0.51309 | 1.69139  | 0.00001 |
| DSG2      | 0.14403  | 0.17561 | -0.19504 | 0.08153 |
| SERPINE1  | 0.10139  | 0.61080 | -0.48914 | 0.01821 |
| CSPG4     | -0.01857 | 0.90075 | 0.12314  | 0.36774 |
| PLXDC2    | -0.01777 | 0.90070 | 1.14825  | 0.00000 |
| ASS1      | -0.02300 | 0.95635 | 0.94096  | 0.00793 |
| ART5      | 0.15941  | 0.41755 | -0.01572 | 0.94747 |
| LY96      | 0.07636  | 0.56843 | -0.02601 | 0.84995 |
| TNFRSF13C | 0.04957  | 0.75283 | 0.02541  | 0.89688 |
| SLC34A3   | 0.50767  | 0.22132 | -0.00851 | 0.98126 |
| RBPM2     | -0.24285 | 0.56098 | -1.08936 | 0.00873 |
| PIBF1     | -0.32602 | 0.29827 | 1.48301  | 0.00000 |
| HMOX1     | -0.13222 | 0.61036 | 0.42220  | 0.06353 |
| CLTA      | -0.02967 | 0.89453 | 0.94640  | 0.00005 |
| LMNB2     | 0.74510  | 0.00706 | 0.97211  | 0.00013 |
| DCTN2     | -0.42280 | 0.21797 | 0.57909  | 0.11569 |



|           |          |         |          |         |
|-----------|----------|---------|----------|---------|
| HMGCL     | 0.31712  | 0.35505 | 1.19182  | 0.00037 |
| SOWAHA    | 0.52106  | 0.03592 | 0.15994  | 0.63886 |
| MEGF9     | -0.14498 | 0.13890 | -0.14688 | 0.22330 |
| CD83      | 0.00822  | 0.95581 | -0.07709 | 0.63034 |
| NAP1L4    | -0.13916 | 0.28111 | 1.23823  | 0.00000 |
| LBR       | -0.12125 | 0.73912 | 0.74870  | 0.04995 |
| DAND5     | 1.34642  | 0.01133 | -0.25613 | 0.62461 |
| EDA2R     | 0.90307  | 0.00102 | 0.43059  | 0.10238 |
| SF3B4     | -0.45581 | 0.16147 | 1.16336  | 0.00079 |
| IL13      | 0.13779  | 0.62282 | -0.04050 | 0.89059 |
| RBM25     | 0.85420  | 0.01238 | 0.51295  | 0.14673 |
| DHRS4L2   | 0.24612  | 0.45601 | 1.31922  | 0.00001 |
| DNM3      | 0.12167  | 0.60180 | 0.47128  | 0.04588 |
| DDX1      | -0.29133 | 0.24913 | 0.36654  | 0.12091 |
| CAT       | -0.03568 | 0.84883 | 1.27751  | 0.00000 |
| ADCYAP1R1 | 0.23729  | 0.11348 | -0.30606 | 0.01915 |
| LGALS1    | 0.29612  | 0.09030 | 0.61484  | 0.00068 |
| CSRP3     | -0.79774 | 0.06486 | 0.50554  | 0.28250 |
| VNN2      | 0.07413  | 0.66315 | -0.57341 | 0.00717 |
| FCER1A    | -0.28889 | 0.00143 | -0.07871 | 0.26317 |
| CTHRC1    | 0.17824  | 0.30372 | -0.07005 | 0.66841 |
| NTF3      | -0.42448 | 0.06156 | 0.53311  | 0.01584 |
| IL1RN     | 0.35406  | 0.36380 | 1.20546  | 0.00185 |
| LDLR      | -0.14274 | 0.38774 | 0.14492  | 0.47090 |
| KLK6      | 0.12162  | 0.44261 | -0.12004 | 0.41344 |
| PNLIPRP1  | 0.27712  | 0.38886 | 0.02524  | 0.93411 |
| SIRT2     | 0.06514  | 0.82280 | 1.90817  | 0.00000 |
| EDN1      | 0.05469  | 0.76604 | 0.79795  | 0.00000 |
| UNC79     | -0.18919 | 0.51921 | -0.15941 | 0.56423 |
| TCL1A     | -0.10916 | 0.79860 | 1.01461  | 0.01308 |
| GABRA4    | 0.54306  | 0.05504 | -0.40400 | 0.12424 |
| CCL20     | 0.58001  | 0.14369 | 0.72037  | 0.07277 |
| MRC1      | 0.47374  | 0.00884 | 0.31284  | 0.07712 |
| CD69      | 0.03707  | 0.90958 | -0.22681 | 0.51197 |
| VCAN      | 0.43118  | 0.00623 | 0.31101  | 0.05243 |
| ELAC1     | 0.30694  | 0.28741 | 1.92130  | 0.00000 |
| GH2       | 0.39765  | 0.38711 | -0.40335 | 0.41413 |
| FRZB      | 0.03008  | 0.83509 | 0.41272  | 0.01863 |
| CASQ2     | 0.12675  | 0.71019 | 0.31547  | 0.16505 |
| BNIP3L    | 0.55446  | 0.04981 | 0.88865  | 0.00123 |
| RCOR1     | 0.42683  | 0.23249 | 0.39806  | 0.16144 |
| CEP112    | 0.31802  | 0.04881 | 0.32413  | 0.06183 |
| SORT1     | 0.21477  | 0.14132 | -0.46396 | 0.00218 |
| DPEP2     | 0.24864  | 0.05003 | 0.94782  | 0.00002 |
| RET       | -0.65864 | 0.00041 | -1.39323 | 0.00000 |
| SEPTIN8   | 0.32428  | 0.09455 | 0.41330  | 0.01042 |
| TIMM8A    | 0.13748  | 0.64377 | 1.89794  | 0.00000 |
| SRPK2     | 0.26129  | 0.33346 | 0.78402  | 0.00117 |

|          |          |         |          |         |
|----------|----------|---------|----------|---------|
| CPB2     | -0.03300 | 0.75433 | -0.05598 | 0.56485 |
| SH3BGRL2 | 0.20830  | 0.35456 | -0.79907 | 0.00094 |
| USO1     | 0.17868  | 0.54665 | 1.64332  | 0.00000 |
| PTH      | 0.09524  | 0.80689 | 0.78017  | 0.04380 |
| C1QTNF1  | -0.03744 | 0.85332 | 0.83190  | 0.00059 |
| TNFSF8   | -0.00128 | 0.99328 | -0.01734 | 0.90133 |
| GIT1     | 0.13313  | 0.61511 | 1.12170  | 0.00009 |
| NID1     | 0.24546  | 0.07860 | 0.09390  | 0.51210 |
| MCAM     | -0.07056 | 0.61971 | -0.21347 | 0.14278 |
| SPON1    | 0.33521  | 0.03912 | 0.25323  | 0.14363 |
| PRSS2    | 0.61981  | 0.04340 | 0.03664  | 0.89884 |
| CREBZF   | 0.11644  | 0.18182 | -0.04405 | 0.68632 |
| MZT1     | -0.43291 | 0.09456 | -0.15271 | 0.49717 |
| CETN2    | -0.13607 | 0.65580 | 0.31141  | 0.30836 |
| OMG      | -0.19516 | 0.43500 | -0.40289 | 0.13396 |
| UBE2L6   | 0.32164  | 0.20372 | 1.21779  | 0.00000 |
| VSTM2B   | 0.18847  | 0.35986 | -0.01365 | 0.95171 |
| PDCL2    | 0.13867  | 0.57252 | 0.05295  | 0.83046 |
| PXDNL    | 0.06701  | 0.74514 | -0.45570 | 0.00411 |
| ITGAV    | -0.24052 | 0.02010 | -0.17686 | 0.30301 |
| HEBP1    | 0.18942  | 0.47956 | -0.42465 | 0.04849 |
| CNPY4    | 0.15105  | 0.50038 | 0.50958  | 0.04523 |
| CRACR2A  | -0.57381 | 0.17201 | -1.76458 | 0.00014 |
| IL4R     | 0.80670  | 0.00299 | 0.43822  | 0.11609 |
| TLR1     | 0.00111  | 0.99470 | -0.11796 | 0.43732 |
| NRTN     | 0.12417  | 0.57193 | 0.03580  | 0.88548 |
| TNR      | -0.45119 | 0.00715 | -0.05861 | 0.72374 |
| ATXN3    | -0.07133 | 0.75642 | 1.62058  | 0.00000 |
| CXCL13   | 0.84124  | 0.00228 | -0.33004 | 0.18668 |
| PXN      | 0.18083  | 0.64977 | 0.22780  | 0.57641 |
| FKBP5    | -0.16910 | 0.55208 | 0.27467  | 0.39348 |
| SERPINC1 | -0.06079 | 0.39117 | -0.02153 | 0.75763 |
| LRRN1    | -0.55789 | 0.00198 | -0.76256 | 0.00001 |
| F11R     | 0.50742  | 0.01345 | 0.18637  | 0.36281 |
| CRYBB2   | 0.33829  | 0.24638 | 0.35433  | 0.11284 |
| PHOSPHO1 | 0.04231  | 0.71178 | -0.07679 | 0.57134 |
| GLB1     | -0.47750 | 0.01571 | -1.04151 | 0.00000 |
| PCDH1    | 0.04580  | 0.25245 | -0.11689 | 0.42067 |
| ICAM3    | 0.08759  | 0.34580 | -0.21799 | 0.06476 |
| ARID4B   | -0.17040 | 0.52242 | 0.62418  | 0.04697 |
| GIPC3    | -0.09790 | 0.73422 | 0.47971  | 0.12804 |
| MFAP3    | 0.11267  | 0.54922 | -0.02156 | 0.90844 |
| F7       | -0.01760 | 0.89997 | 0.14853  | 0.32973 |
| ICA1     | -0.02501 | 0.93627 | 0.57600  | 0.03634 |
| GSTT2B   | -0.14488 | 0.80852 | 1.80109  | 0.00173 |
| PLXNB3   | -0.14796 | 0.36383 | -0.23442 | 0.16440 |
| HNMT     | 0.30799  | 0.39554 | 1.01848  | 0.00399 |
| FZD10    | 0.55642  | 0.32355 | 0.67656  | 0.15468 |

|            |          |         |          |         |
|------------|----------|---------|----------|---------|
| PPP1R2     | 0.25129  | 0.37751 | 1.63333  | 0.00000 |
| ARFIP1     | 0.11423  | 0.70734 | 2.01060  | 0.00000 |
| SERPINF1   | -0.09243 | 0.08749 | -0.04235 | 0.44924 |
| GMFG       | -0.15147 | 0.60995 | 1.31511  | 0.00001 |
| SPINT3     | -0.48509 | 0.20377 | -0.21134 | 0.61793 |
| CD63       | 0.17592  | 0.45207 | -0.55709 | 0.02504 |
| CDH2       | 0.48108  | 0.00055 | 0.48568  | 0.00175 |
| C1QTNF5    | -0.29135 | 0.01967 | -0.19910 | 0.13302 |
| SPOCK1     | -0.07608 | 0.62877 | -0.02874 | 0.84460 |
| TNFAIP8L2  | -0.24115 | 0.47022 | 1.35520  | 0.00001 |
| GNPDA2     | 0.03961  | 0.81136 | 0.16034  | 0.26083 |
| SERPINA6   | -0.02217 | 0.79890 | -0.12408 | 0.19893 |
| UPK3A      | -0.25149 | 0.33804 | -0.26351 | 0.30245 |
| HS1BP3     | 0.14689  | 0.53800 | 1.77063  | 0.00000 |
| LAIR1      | 0.48554  | 0.01977 | 0.27005  | 0.20468 |
| AKT2       | 0.41263  | 0.39435 | 3.90856  | 0.00000 |
| CD226      | -0.00329 | 0.98413 | -0.60864 | 0.00034 |
| C1QA       | 0.47817  | 0.00101 | -0.01115 | 0.94794 |
| BMP4       | -0.23011 | 0.30347 | 0.10310  | 0.63309 |
| SCAMP3     | 0.18189  | 0.55292 | -0.21524 | 0.51680 |
| GLA        | 0.01560  | 0.91010 | 0.03243  | 0.79559 |
| ADH1B      | -0.18766 | 0.69529 | 1.14792  | 0.00806 |
| SUMF1      | 0.10940  | 0.60160 | 0.36978  | 0.11055 |
| PDGFRB     | 0.16216  | 0.14227 | -0.17578 | 0.15000 |
| ARL2BP     | -0.04953 | 0.84730 | 1.32023  | 0.00000 |
| CEP85      | -0.26847 | 0.24675 | 0.12814  | 0.57801 |
| COMMD9     | -0.13927 | 0.46809 | 0.18832  | 0.23947 |
| YOD1       | 0.00442  | 0.98613 | 0.77683  | 0.00187 |
| IGLON5     | 0.09837  | 0.73492 | -0.15025 | 0.55967 |
| PGR        | 0.08867  | 0.69687 | 0.24182  | 0.25533 |
| RBPM5      | -0.08904 | 0.85235 | -0.37545 | 0.34779 |
| CCL15      | 0.29440  | 0.09872 | 0.08617  | 0.65809 |
| NTproBNP   | 1.67983  | 0.00077 | 0.71582  | 0.10008 |
| GADD45GIP1 | 0.51573  | 0.07668 | 1.14407  | 0.00001 |
| ODAM       | -0.08205 | 0.74317 | -0.34213 | 0.13408 |
| IL2RB      | 0.36953  | 0.06737 | 0.06883  | 0.72125 |
| TNFRSF11A  | 0.51178  | 0.02013 | 0.18323  | 0.53944 |
| ITGBL1     | 0.22179  | 0.18035 | 0.26410  | 0.04288 |
| CXADR      | 0.51863  | 0.04669 | 0.26123  | 0.24395 |
| FZD8       | 0.21917  | 0.14721 | 0.01506  | 0.94296 |
| IMPACT     | 0.45220  | 0.02563 | 2.00738  | 0.00000 |
| CFI        | 0.03336  | 0.57270 | -0.02661 | 0.63827 |
| STAT2      | 0.45907  | 0.12329 | 1.03095  | 0.00021 |
| CTSS       | 0.08750  | 0.30186 | 0.11873  | 0.21921 |
| F2         | -0.13580 | 0.05504 | -0.39070 | 0.00000 |
| ADGRE5     | -0.07470 | 0.52824 | -0.16555 | 0.23680 |
| STX16      | -0.00485 | 0.98590 | -0.67756 | 0.01395 |
| MGMT       | 0.02779  | 0.94060 | 2.72750  | 0.00000 |

|             |          |         |          |         |
|-------------|----------|---------|----------|---------|
| DDA1        | 0.30595  | 0.16471 | 0.59068  | 0.01057 |
| EPHA2       | 0.49105  | 0.01385 | 0.23704  | 0.31528 |
| TNFAIP8     | -0.21408 | 0.54551 | -0.51238 | 0.15989 |
| BRDT        | 0.24799  | 0.26114 | 1.23827  | 0.00000 |
| ECM1        | 0.02290  | 0.85248 | 0.50863  | 0.00046 |
| PRL         | 0.07590  | 0.79267 | 0.45832  | 0.16461 |
| NBN         | 0.30106  | 0.44348 | 0.53715  | 0.14855 |
| NOTCH3      | 0.01636  | 0.90893 | -0.19257 | 0.21637 |
| NT5E        | 0.49649  | 0.07693 | 0.09899  | 0.68621 |
| TNFRSF4     | 0.28789  | 0.06769 | -0.01484 | 0.94694 |
| ITGA11      | -0.65954 | 0.00022 | 0.00216  | 0.99032 |
| PCARE       | 0.14648  | 0.60016 | 0.20004  | 0.49992 |
| IL12RB1     | 0.06007  | 0.71860 | 0.02753  | 0.86222 |
| MIA         | 0.17580  | 0.34499 | -0.23903 | 0.17464 |
| CD209       | -0.09925 | 0.36208 | -0.24359 | 0.06337 |
| MAP2K6      | -0.26931 | 0.37171 | -0.29828 | 0.34638 |
| APOL1       | -0.02812 | 0.89807 | -0.45490 | 0.07599 |
| GNE         | 0.05102  | 0.83945 | 1.16863  | 0.00000 |
| DNLZ        | 0.61955  | 0.07853 | 0.56093  | 0.16272 |
| DPEP1       | -0.02246 | 0.89883 | -0.41526 | 0.03181 |
| AGR2        | 1.86716  | 0.00176 | 0.97394  | 0.06897 |
| SEZ6        | 0.19937  | 0.22630 | -0.08902 | 0.56956 |
| VWC2        | 0.17636  | 0.39063 | -0.08190 | 0.70413 |
| ACY1        | 0.16135  | 0.58987 | 0.32031  | 0.23881 |
| NFKB2       | 0.06361  | 0.81463 | -0.03430 | 0.89480 |
| CHCHD10     | 0.65975  | 0.02555 | 0.96118  | 0.00104 |
| CRX         | 0.16559  | 0.67387 | -0.25295 | 0.51375 |
| LAYN        | 0.35619  | 0.09378 | 0.06033  | 0.78369 |
| FYB1        | 0.20566  | 0.54885 | 3.07409  | 0.00000 |
| TAX1BP1     | 0.06177  | 0.81746 | 0.08105  | 0.74563 |
| MRPS16      | 0.24379  | 0.03408 | 0.14609  | 0.17493 |
| MUC2        | 0.04760  | 0.88792 | 0.06893  | 0.83387 |
| CLMP        | -0.08235 | 0.55877 | -0.23958 | 0.23355 |
| TNFRSF17    | 0.27481  | 0.03174 | -0.21804 | 0.05182 |
| IL12A_IL12B | 0.13430  | 0.64496 | -0.27137 | 0.39270 |
| SCARB1      | 0.29894  | 0.31403 | 0.13401  | 0.60656 |
| PGM2        | -0.22670 | 0.42365 | 0.34978  | 0.25287 |
| NMRK2       | 0.50256  | 0.04579 | -0.28447 | 0.18284 |
| SKIV2L      | -0.12908 | 0.66046 | -0.17121 | 0.45584 |
| SLC13A1     | -0.11833 | 0.59357 | 0.29641  | 0.10203 |
| SIGLEC5     | 0.23344  | 0.63212 | 0.93041  | 0.04303 |
| MCTS1       | -0.22682 | 0.46508 | 0.16384  | 0.49434 |
| SAT1        | -0.16619 | 0.47965 | -0.09757 | 0.62606 |
| UNC5D       | 0.16196  | 0.22043 | 0.00131  | 0.99034 |
| METAP1D     | 0.32511  | 0.38914 | 1.95284  | 0.00000 |
| SCRG1       | 0.30806  | 0.07251 | -0.03928 | 0.80073 |
| PCDH17      | -0.03893 | 0.84795 | 0.17942  | 0.35247 |
| CTBS        | -0.07275 | 0.49753 | -0.10440 | 0.27507 |

|          |          |         |          |         |
|----------|----------|---------|----------|---------|
| IL13RA1  | -0.02797 | 0.75573 | -0.17762 | 0.05197 |
| LYN      | 0.14136  | 0.58952 | 2.39681  | 0.00000 |
| TNFRSF1B | 0.48533  | 0.01661 | 0.31972  | 0.13454 |
| NACCI    | -0.06657 | 0.82017 | 1.07983  | 0.00009 |
| CSNK1D   | 0.34372  | 0.39090 | 2.11893  | 0.00000 |
| LAP3     | 0.18505  | 0.54733 | 1.24953  | 0.00002 |
| TP73     | 0.24255  | 0.62544 | 0.44166  | 0.38761 |
| SBSN     | -0.13907 | 0.25260 | -0.08386 | 0.49327 |
| LGALS9   | 0.42512  | 0.00759 | 0.48024  | 0.00816 |
| RAB27B   | -0.12791 | 0.64050 | -0.49905 | 0.06938 |
| CRELD2   | 0.32779  | 0.06958 | 0.33622  | 0.08919 |
| SPARCL1  | -0.00386 | 0.97105 | -0.09054 | 0.44280 |
| DKK3     | 0.09798  | 0.45093 | -0.06011 | 0.69618 |
| NCAM2    | -0.07708 | 0.41855 | -0.26003 | 0.06346 |
| PLB1     | -0.29091 | 0.11970 | -0.83792 | 0.00018 |
| ORM1     | 0.23647  | 0.10165 | 0.22720  | 0.13632 |
| DCC      | -0.07825 | 0.30633 | -0.21416 | 0.00530 |
| SEMA4C   | -0.47592 | 0.04924 | -1.48354 | 0.00000 |
| CRYM     | 0.44483  | 0.21092 | 0.80047  | 0.02188 |
| COL28A1  | -0.30039 | 0.16906 | 0.16926  | 0.46027 |
| USP47    | -0.08544 | 0.76177 | -0.08361 | 0.72772 |
| EXTL1    | -0.39378 | 0.14152 | -0.69957 | 0.00248 |
| IGFBP1   | 1.23886  | 0.00486 | 1.45702  | 0.00057 |
| SEL1L    | 0.29821  | 0.10804 | 0.11361  | 0.49692 |
| IKBKG    | -0.28602 | 0.30194 | -0.14214 | 0.62341 |
| APBB1IP  | 0.16733  | 0.63388 | 0.32331  | 0.31188 |
| CDC26    | 0.29600  | 0.28254 | 0.95097  | 0.00037 |
| COL18A1  | 0.32623  | 0.00136 | -0.01851 | 0.86967 |
| CPVL     | -0.38093 | 0.00693 | -0.18892 | 0.36198 |
| SUSD4    | 0.27726  | 0.12889 | 0.07343  | 0.69395 |
| EEF1D    | -0.34309 | 0.37155 | -0.19211 | 0.58352 |
| HCG22    | 0.29314  | 0.25176 | -0.32353 | 0.16616 |
| NFASC    | 0.04878  | 0.69591 | -0.21961 | 0.07072 |
| F3       | 0.04847  | 0.64871 | -0.08608 | 0.69687 |
| OMP      | 0.12600  | 0.54641 | 0.52498  | 0.01004 |
| LYZL2    | 0.04525  | 0.76877 | -0.29260 | 0.03709 |
| HCLS1    | 0.14442  | 0.51333 | 1.37321  | 0.00000 |
| SCT      | -0.12555 | 0.34610 | -0.39944 | 0.00373 |
| CFP      | -0.16828 | 0.01911 | -0.10133 | 0.19074 |
| KLHL41   | -0.89254 | 0.00119 | -0.14164 | 0.51120 |
| SIRPB1   | 0.43008  | 0.01329 | 0.32638  | 0.08408 |
| UHRF2    | -0.01065 | 0.95779 | 0.19463  | 0.30203 |
| CD207    | -0.04012 | 0.80633 | -0.37684 | 0.03585 |
| BACH1    | 0.21222  | 0.36284 | 0.04597  | 0.82723 |
| TXNDC5   | 0.51791  | 0.03649 | 0.85088  | 0.00083 |
| MYL1     | -0.08882 | 0.75417 | 0.17217  | 0.43811 |
| ACSL1    | -0.12031 | 0.55942 | -0.27845 | 0.16270 |
| SHC1     | 0.40833  | 0.43229 | -0.34315 | 0.52905 |

|          |          |         |          |         |
|----------|----------|---------|----------|---------|
| ADAMTS4  | 0.53989  | 0.00455 | 0.55001  | 0.00921 |
| PPIE     | 0.11236  | 0.78242 | -0.63539 | 0.12729 |
| WASL     | 1.14875  | 0.01667 | 0.70050  | 0.16268 |
| PRDX1    | -0.18059 | 0.47371 | 0.74339  | 0.00317 |
| ANPEP    | 0.03258  | 0.85114 | -0.07227 | 0.62732 |
| ADAM23   | -0.10256 | 0.48503 | 0.25354  | 0.28996 |
| BCAN     | -0.10244 | 0.52814 | -0.24902 | 0.11270 |
| RWDD1    | -0.05300 | 0.82893 | 1.38307  | 0.00000 |
| EIF2S2   | 0.17667  | 0.60737 | 2.09484  | 0.00000 |
| ROBO4    | 0.11850  | 0.05323 | -0.05180 | 0.38516 |
| BABAM1   | -0.06933 | 0.68735 | 0.37570  | 0.05365 |
| MILR1    | 0.33608  | 0.10617 | 0.25163  | 0.20867 |
| ADAMTS8  | -0.32669 | 0.04491 | -0.46891 | 0.00605 |
| FKBPL    | 0.15505  | 0.53971 | 1.40090  | 0.00000 |
| DYNLT3   | -0.08118 | 0.73116 | 0.61639  | 0.00676 |
| MCEMP1   | 0.06430  | 0.87519 | -0.19763 | 0.62313 |
| LEP      | -1.25607 | 0.00156 | -0.57951 | 0.12973 |
| SARG     | 0.34372  | 0.34879 | 2.51398  | 0.00000 |
| NAGK     | -0.27748 | 0.29072 | 0.81711  | 0.00200 |
| CDC123   | 0.04766  | 0.88839 | -0.25179 | 0.39913 |
| CCNE1    | 0.37639  | 0.03937 | 0.26626  | 0.09255 |
| RICTOR   | 0.09219  | 0.58644 | -0.06410 | 0.75441 |
| TFF1     | 1.15340  | 0.00017 | 0.62482  | 0.03079 |
| FKBP1B   | -0.41768 | 0.35402 | -0.57573 | 0.18578 |
| ENOPH1   | -0.37113 | 0.04705 | -0.03085 | 0.89323 |
| TP53I3   | 0.08980  | 0.69936 | 1.15306  | 0.00000 |
| IL31RA   | -0.15988 | 0.24778 | -0.36917 | 0.00865 |
| IL16     | -0.15960 | 0.42415 | 0.11483  | 0.63168 |
| PTGDS    | 0.20072  | 0.18721 | -0.04569 | 0.75251 |
| ICAM5    | 0.20933  | 0.12195 | -0.15040 | 0.34130 |
| VWC2L    | -0.14316 | 0.42155 | -0.47219 | 0.00034 |
| CEACAM19 | -0.05269 | 0.75615 | -0.15866 | 0.26375 |
| KEL      | 0.34063  | 0.03739 | 0.29140  | 0.07344 |
| GGT1     | 0.16235  | 0.55589 | 0.20229  | 0.38165 |
| PLA2G10  | 0.53774  | 0.03122 | -0.58299 | 0.01822 |
| NCAN     | -0.28482 | 0.04401 | -0.22079 | 0.19294 |
| COPB2    | 0.17325  | 0.58209 | -0.00831 | 0.97392 |
| CXCL1    | -0.02677 | 0.91548 | -0.33921 | 0.16282 |
| SMAD3    | 0.56467  | 0.11798 | 1.59422  | 0.00000 |
| FETUB    | 0.08771  | 0.66559 | -0.15914 | 0.37088 |
| RELT     | 0.24405  | 0.13140 | -0.10927 | 0.51482 |
| RNASE4   | 0.08199  | 0.58933 | 0.22554  | 0.08320 |
| GIGYF2   | -0.18638 | 0.55644 | 0.11375  | 0.69302 |
| FKBP7    | 0.13075  | 0.54219 | 0.62958  | 0.00352 |
| NFIC     | 0.01196  | 0.94409 | 0.51814  | 0.00018 |
| TARS1    | 0.12869  | 0.35863 | 1.19679  | 0.00000 |
| LZTFL1   | -0.08156 | 0.76330 | 1.72239  | 0.00000 |
| MOCS2    | 0.20553  | 0.39595 | 0.98605  | 0.00000 |

|          |          |         |          |         |
|----------|----------|---------|----------|---------|
| VSIG10   | -0.00108 | 0.99374 | -0.13720 | 0.25844 |
| AREG     | 0.74423  | 0.05940 | 0.48883  | 0.22101 |
| PTPRN2   | 0.38750  | 0.11023 | -0.02942 | 0.87056 |
| PSME2    | 0.14405  | 0.38844 | 1.11230  | 0.00000 |
| JAM3     | 0.51684  | 0.00736 | 0.20623  | 0.24473 |
| PON2     | 0.17947  | 0.26080 | 0.76453  | 0.00001 |
| PVALB    | 0.15001  | 0.61656 | -0.08971 | 0.80436 |
| AKAP12   | -0.08984 | 0.32729 | -0.30829 | 0.00108 |
| LRIG1    | 0.22094  | 0.18348 | 0.23667  | 0.30078 |
| NIT1     | -0.05194 | 0.70179 | 1.54420  | 0.00000 |
| EIF2AK2  | -0.24393 | 0.60542 | 1.07388  | 0.01218 |
| SLITRK1  | -0.04274 | 0.75812 | -0.25104 | 0.07031 |
| GP2      | 0.59960  | 0.08950 | 0.41605  | 0.30356 |
| FSHB     | 0.23011  | 0.20315 | 0.86442  | 0.00220 |
| ROR1     | 0.20568  | 0.10670 | -0.14676 | 0.33120 |
| RRM2B    | -0.20996 | 0.44608 | 0.24638  | 0.34348 |
| COX6B1   | 0.20767  | 0.50038 | 1.01478  | 0.00075 |
| CPOX     | 0.03817  | 0.79499 | 0.36232  | 0.00279 |
| TPK1     | 0.03323  | 0.82616 | 0.31210  | 0.01958 |
| EGF      | 0.26742  | 0.44728 | -1.39657 | 0.00008 |
| SSBP1    | 0.16071  | 0.61191 | 0.72420  | 0.01171 |
| SERPINE2 | 0.16178  | 0.52236 | -1.36609 | 0.00000 |
| ROBO2    | -0.11904 | 0.28752 | -0.20342 | 0.10267 |
| TPSAB1   | 0.06874  | 0.69423 | 0.13523  | 0.55719 |
| MYCBP2   | 0.22040  | 0.36933 | -0.40431 | 0.07484 |
| IL31     | 0.23241  | 0.34897 | 0.21282  | 0.39263 |
| UBAC1    | 0.00991  | 0.93792 | 0.58888  | 0.00055 |
| MAP2K1   | 0.00338  | 0.99203 | 1.00446  | 0.00127 |
| SFTPA2   | 0.02755  | 0.90693 | -0.13871 | 0.59735 |
| SFTPD    | 0.06547  | 0.73620 | -0.45236 | 0.01986 |
| EVI5     | -0.56531 | 0.07551 | 0.20464  | 0.51768 |
| MTR      | 0.13111  | 0.52559 | 0.41853  | 0.02594 |
| STAU1    | 0.41351  | 0.17703 | 0.18904  | 0.46284 |
| BAG6     | -0.17386 | 0.19802 | -0.03412 | 0.82201 |
| LAT2     | -0.25653 | 0.50935 | 1.44488  | 0.00025 |
| EDF1     | -0.08609 | 0.83444 | 1.00515  | 0.00884 |
| TCN1     | 0.22210  | 0.31915 | 0.04409  | 0.79677 |
| FLT4     | 0.33269  | 0.01346 | -0.11576 | 0.34643 |
| IL22     | 0.85752  | 0.00289 | -0.10203 | 0.72179 |
| CD3G     | 0.18876  | 0.56071 | 0.31059  | 0.34897 |
| ITPA     | -0.00798 | 0.97830 | 1.35280  | 0.00000 |
| KLK11    | 0.10664  | 0.50544 | -0.00803 | 0.95410 |
| ACE2     | 0.79024  | 0.01692 | 0.19914  | 0.50061 |
| GPR158   | 0.22294  | 0.18678 | 0.33551  | 0.05112 |
| NCF2     | 0.57327  | 0.25528 | 0.56449  | 0.25288 |
| UXS1     | 0.14164  | 0.40680 | -0.08093 | 0.67464 |
| CSPG5    | 0.34363  | 0.06260 | 0.07463  | 0.68380 |
| CTNNA1   | 0.14680  | 0.45035 | -0.16244 | 0.32928 |

|           |          |         |          |         |
|-----------|----------|---------|----------|---------|
| HMCN2     | -0.56909 | 0.02255 | -0.45274 | 0.05691 |
| FGA       | 0.29417  | 0.30528 | 5.95859  | 0.00000 |
| FGF9      | -0.17739 | 0.62844 | -0.10763 | 0.74900 |
| TNFRSF10B | 0.67491  | 0.03887 | 0.40745  | 0.14665 |
| UROD      | 0.14736  | 0.49362 | 1.80104  | 0.00000 |
| TOP1      | -0.26191 | 0.43487 | -0.62806 | 0.04389 |
| CEP20     | -0.43340 | 0.13546 | 0.72233  | 0.02051 |
| PRKG1     | 0.00936  | 0.98328 | 0.64631  | 0.11349 |
| AIF1L     | 0.28150  | 0.05681 | 0.16600  | 0.26672 |
| HS6ST2    | -0.14323 | 0.42648 | -0.27361 | 0.10640 |
| FOSB      | 0.23405  | 0.41708 | 0.33952  | 0.22290 |
| PMCH      | 0.01468  | 0.92907 | 0.18110  | 0.32212 |
| NUDT5     | 0.27442  | 0.23184 | 1.21770  | 0.00000 |
| CXCL11    | 1.05061  | 0.00054 | 0.13154  | 0.64548 |
| PAFAH1B3  | -0.02920 | 0.91042 | 0.15663  | 0.47225 |
| RIDA      | 0.12364  | 0.71830 | 1.24311  | 0.00006 |
| ACRV1     | 0.43786  | 0.22669 | 0.00862  | 0.96577 |
| GIPR      | 0.41486  | 0.38364 | 0.30212  | 0.54334 |
| ABCA2     | 0.20300  | 0.25580 | 0.07924  | 0.62086 |
| KIRREL2   | 0.16322  | 0.31238 | -0.18985 | 0.17944 |
| HSPB6     | 0.08746  | 0.69621 | 0.05483  | 0.83928 |
| C9        | 0.32010  | 0.03324 | 0.33365  | 0.02433 |
| NPR1      | 0.15267  | 0.17207 | -0.00811 | 0.94218 |
| RGS8      | -0.20316 | 0.21377 | 0.00865  | 0.96378 |
| CD160     | 0.33781  | 0.05680 | -0.14947 | 0.49823 |
| ITGB7     | -0.25177 | 0.15262 | -0.25894 | 0.23062 |
| LAMA4     | -0.04140 | 0.76022 | -0.08153 | 0.54978 |
| IL1A      | -0.34723 | 0.08783 | -0.16236 | 0.45309 |
| IL18BP    | 0.23743  | 0.13072 | 0.22794  | 0.17444 |
| FABP2     | 0.23627  | 0.41459 | 0.18726  | 0.49464 |
| SORBS1    | 0.29461  | 0.24526 | 1.17819  | 0.00004 |
| GSTP1     | -0.33353 | 0.21592 | -0.38509 | 0.08901 |
| HNRNPK    | 0.31025  | 0.47069 | 3.20060  | 0.00000 |
| FCRL2     | -0.20387 | 0.16783 | -0.39492 | 0.04967 |
| GJA8      | 0.50654  | 0.04004 | -0.29775 | 0.28507 |
| CCL18     | 0.51463  | 0.01410 | 0.23590  | 0.27982 |
| PECR      | -0.05231 | 0.47265 | 0.10848  | 0.20368 |
| S100A3    | 0.00128  | 0.99436 | 0.22213  | 0.11316 |
| RBP5      | 0.27861  | 0.37129 | 0.59986  | 0.05663 |
| QPCT      | 0.00540  | 0.95623 | 0.08979  | 0.40010 |
| ARNT      | 0.19044  | 0.35989 | -0.02352 | 0.84138 |
| BCL2L15   | 0.39685  | 0.36852 | 0.24284  | 0.54694 |
| PI3       | 0.52808  | 0.02455 | -0.06117 | 0.77228 |
| SKAP2     | -0.44200 | 0.16448 | -0.17461 | 0.58762 |
| C7        | 0.24689  | 0.07582 | 0.06090  | 0.65679 |
| CCN3      | 0.22300  | 0.14064 | -0.03838 | 0.82955 |
| RBFOX3    | 0.96437  | 0.00483 | 1.14179  | 0.00022 |
| SIGLEC10  | 0.39435  | 0.11519 | 0.28230  | 0.23963 |



|           |          |         |          |         |
|-----------|----------|---------|----------|---------|
| FDX2      | 0.82746  | 0.03288 | 1.10987  | 0.00012 |
| KIF22     | 0.57196  | 0.11726 | 1.97073  | 0.00000 |
| SERPINI1  | -0.00904 | 0.93918 | -0.71916 | 0.00000 |
| APOC1     | -0.14303 | 0.45359 | -0.17509 | 0.26146 |
| CTLA4     | 0.01153  | 0.96231 | -0.26128 | 0.34192 |
| BCAT1     | 0.11127  | 0.49464 | 0.46864  | 0.00529 |
| CASP3     | 0.05960  | 0.83845 | 1.40196  | 0.00000 |
| IL17A     | 1.06570  | 0.00325 | -0.07521 | 0.80660 |
| CD84      | -0.06539 | 0.56833 | -0.47722 | 0.00256 |
| EREG      | 0.35686  | 0.49221 | -1.77536 | 0.00019 |
| HGS       | 0.11224  | 0.71666 | 1.73002  | 0.00000 |
| CHL1      | -0.02651 | 0.83693 | -0.24404 | 0.08027 |
| ELOA      | 0.21695  | 0.59781 | 0.72275  | 0.07942 |
| EPHA10    | -0.04052 | 0.87604 | 0.57165  | 0.04831 |
| DBH       | -0.55180 | 0.12097 | -0.07151 | 0.79328 |
| HK2       | -0.17340 | 0.67951 | 0.08991  | 0.82450 |
| PPT1      | 0.30162  | 0.19846 | -0.28230 | 0.16444 |
| TFF2      | 0.32606  | 0.23604 | -0.13963 | 0.57051 |
| ITGA5     | 0.07457  | 0.45842 | 0.86421  | 0.00000 |
| AFAP1     | -0.58218 | 0.33432 | 0.68639  | 0.16325 |
| CRNN      | -0.11541 | 0.61572 | -0.19279 | 0.38024 |
| SSH3      | -0.11135 | 0.28657 | 0.05261  | 0.63586 |
| LRRC37A2  | 0.13994  | 0.35086 | -0.19888 | 0.12714 |
| CENPF     | 0.10127  | 0.69170 | 1.28899  | 0.00000 |
| IL2       | 0.15071  | 0.62957 | -0.11148 | 0.67298 |
| ZPR1      | -0.24790 | 0.34819 | 0.03309  | 0.89505 |
| UMOD      | -0.12115 | 0.42945 | -0.45040 | 0.00606 |
| ACP6      | 0.33184  | 0.06964 | 0.54196  | 0.04728 |
| CDKL5     | 0.25393  | 0.24287 | 0.08524  | 0.68241 |
| SKAP1     | 0.25250  | 0.48234 | 0.62142  | 0.08970 |
| OSBPL2    | -0.21469 | 0.21604 | 0.13918  | 0.47333 |
| RELB      | 0.35769  | 0.28041 | 0.45565  | 0.29624 |
| MAPT      | 0.53313  | 0.28171 | 0.85445  | 0.10594 |
| EPHB4     | 0.25086  | 0.06892 | 0.21707  | 0.14855 |
| NCK2      | 0.52794  | 0.14655 | 2.21467  | 0.00000 |
| NXPE4     | 0.10588  | 0.67125 | 0.16972  | 0.46448 |
| ANXA10    | 0.02395  | 0.94350 | 0.79190  | 0.04434 |
| DHPS      | -0.01434 | 0.96092 | 0.61425  | 0.02217 |
| STX3      | -0.15458 | 0.16700 | 0.23938  | 0.08501 |
| IFNGR1    | 0.10030  | 0.36428 | 0.07278  | 0.48914 |
| MAP1LC3B2 | 0.09114  | 0.63779 | -0.20067 | 0.37020 |
| TPRKB     | 0.15874  | 0.57782 | -0.03146 | 0.89437 |
| HS6ST1    | -0.16816 | 0.26920 | -0.11701 | 0.57224 |
| MUC16     | 0.89145  | 0.01914 | 0.50734  | 0.22395 |
| IL1B      | 0.12453  | 0.78957 | 0.09202  | 0.84182 |
| CEACAM6   | -0.02289 | 0.93264 | 0.02099  | 0.91256 |
| IGBP1     | 0.00399  | 0.98784 | 2.08756  | 0.00000 |
| HGF       | 0.51044  | 0.06920 | 0.30756  | 0.35696 |

|           |          |         |          |         |
|-----------|----------|---------|----------|---------|
| RABEPK    | -0.07081 | 0.75334 | 0.37719  | 0.09982 |
| BAMBI     | 0.25952  | 0.09057 | -0.02014 | 0.85952 |
| CTRC      | -0.35675 | 0.28415 | -0.90931 | 0.00761 |
| VSNL1     | 0.10177  | 0.71912 | 0.12104  | 0.62747 |
| NPTXR     | -0.15628 | 0.36201 | -0.03229 | 0.80807 |
| CD48      | 0.04427  | 0.71196 | -0.01958 | 0.88539 |
| NRP1      | 0.16980  | 0.12188 | -0.08847 | 0.43086 |
| MYLPF     | -0.32186 | 0.40366 | -0.05310 | 0.87380 |
| ACP1      | -0.42960 | 0.10398 | -0.20302 | 0.42992 |
| SSB       | 0.18453  | 0.54265 | 0.28865  | 0.31042 |
| FHIP2A    | -0.11772 | 0.59621 | -0.10050 | 0.59720 |
| SNCA      | 0.95782  | 0.01659 | 2.47289  | 0.00000 |
| OSCAR     | 0.39770  | 0.00275 | 0.06881  | 0.62346 |
| PODXL2    | -0.04126 | 0.75945 | 0.00527  | 0.97100 |
| RAB11FIP3 | -0.24492 | 0.51460 | 1.01246  | 0.00269 |
| RAB44     | 0.21159  | 0.68028 | 0.54345  | 0.26440 |
| TXNL1     | 0.11864  | 0.58427 | -0.45726 | 0.05839 |
| VAMP8     | -0.39989 | 0.22395 | -0.04131 | 0.89316 |
| LYPD1     | 0.24853  | 0.48661 | -0.23931 | 0.42105 |
| TRIM5     | -0.83225 | 0.00147 | -0.42997 | 0.09967 |
| RSPO1     | 0.36064  | 0.20817 | 0.23720  | 0.42337 |
| IL9       | 0.18254  | 0.39444 | -0.51848 | 0.02513 |
| KLKB1     | -0.08664 | 0.30038 | -0.15318 | 0.09285 |
| SPINK2    | 0.05504  | 0.70613 | 0.65324  | 0.00007 |
| SIGLEC15  | 0.00014  | 0.99938 | -0.21851 | 0.35842 |
| MBL2      | -0.03402 | 0.91420 | -0.22554 | 0.46204 |
| ADA2      | 0.22767  | 0.16000 | 0.01270  | 0.93727 |
| PRKAR2A   | -0.17873 | 0.51581 | 0.47755  | 0.08446 |
| RAB10     | -0.03568 | 0.91658 | 0.47588  | 0.10867 |
| CHCHD6    | 0.64661  | 0.00610 | 0.50702  | 0.00276 |
| CHMP6     | 0.11250  | 0.56625 | 0.48898  | 0.00674 |
| SPTLC1    | -0.08858 | 0.71432 | 0.36511  | 0.12634 |
| PTPRH     | 0.10616  | 0.64261 | 0.32145  | 0.16939 |
| CRH       | -0.46990 | 0.21654 | -1.52452 | 0.00025 |
| CREG1     | -0.31578 | 0.06246 | -0.09643 | 0.56762 |
| PRTN3     | -0.22384 | 0.41681 | -0.32805 | 0.29605 |
| ESYT2     | -0.04719 | 0.87957 | 0.57857  | 0.06296 |
| GRPEL1    | 0.92932  | 0.01065 | 1.39006  | 0.00006 |
| MNDA      | 0.51312  | 0.27271 | -0.09809 | 0.82692 |
| GASK1A    | 0.03081  | 0.88996 | -0.52657 | 0.01358 |
| CYTH3     | 0.38257  | 0.14719 | 0.13769  | 0.62525 |
| FAM171A2  | 0.18247  | 0.67658 | -0.54399 | 0.20026 |
| EIF4EBP1  | 0.43632  | 0.10376 | 2.17157  | 0.00000 |
| MAN2B2    | -0.38773 | 0.05889 | -0.05430 | 0.77391 |
| SERPINF2  | -0.04639 | 0.57666 | 0.37911  | 0.00066 |
| GHR       | -0.56163 | 0.00021 | -0.18382 | 0.23582 |
| CD248     | -0.09608 | 0.56351 | -0.15408 | 0.35274 |
| IGSF21    | -0.49947 | 0.00318 | -0.75468 | 0.00001 |

|          |          |         |          |         |
|----------|----------|---------|----------|---------|
| STAB2    | 0.07157  | 0.44487 | -0.04848 | 0.61651 |
| ZHX2     | 0.03058  | 0.91445 | 0.44487  | 0.15319 |
| EVI2B    | 0.50708  | 0.06294 | 0.21552  | 0.33950 |
| SNED1    | 0.00598  | 0.97050 | 0.64445  | 0.00046 |
| PMS1     | 0.76986  | 0.02638 | 0.49547  | 0.11197 |
| FABP1    | 0.71229  | 0.15619 | 1.40681  | 0.00230 |
| CLC      | -0.02052 | 0.95632 | -0.03475 | 0.91124 |
| LPA      | 0.94896  | 0.02044 | 0.65666  | 0.11111 |
| CTRL     | 0.07214  | 0.81337 | -0.15535 | 0.60713 |
| GPIHBP1  | 0.18544  | 0.09951 | 0.26642  | 0.03054 |
| GPI      | -0.18681 | 0.52195 | 1.26149  | 0.00000 |
| SCRN1    | -0.31942 | 0.31505 | 0.30783  | 0.32508 |
| FGFBP3   | 0.19187  | 0.29324 | 0.34085  | 0.02521 |
| GBP6     | 0.10886  | 0.72705 | 0.27442  | 0.45091 |
| SOX2     | 0.29997  | 0.27076 | 0.19210  | 0.34440 |
| RAB33A   | -0.49360 | 0.09964 | -0.94693 | 0.00053 |
| BTD      | -0.21672 | 0.02653 | -0.14264 | 0.14894 |
| SHD      | 0.35564  | 0.38996 | 0.61033  | 0.05289 |
| WASF3    | -0.15712 | 0.72060 | 1.64497  | 0.00055 |
| BTN1A1   | 0.25255  | 0.11309 | -0.26810 | 0.12303 |
| OSTN     | -0.01330 | 0.94178 | -0.03543 | 0.87124 |
| BLOC1S3  | -0.00492 | 0.98145 | 0.54221  | 0.00205 |
| DEFB118  | -0.05086 | 0.87392 | -0.21808 | 0.46814 |
| IL3RA    | -0.07476 | 0.47415 | -0.12503 | 0.14976 |
| CA11     | 0.04718  | 0.67686 | -0.03457 | 0.76444 |
| FGFBP2   | -0.43630 | 0.03814 | -0.34015 | 0.08515 |
| HDAC8    | -0.60022 | 0.02659 | 0.17788  | 0.55816 |
| FADD     | -0.29706 | 0.36412 | 1.28377  | 0.00002 |
| THY1     | 0.08347  | 0.57601 | -0.10760 | 0.47388 |
| CACYBP   | -0.20892 | 0.53484 | 0.74341  | 0.01938 |
| SMAD1    | -0.11677 | 0.67253 | 0.77093  | 0.00221 |
| GFAP     | 0.37840  | 0.12933 | 0.37449  | 0.12039 |
| ITGA2    | -0.19578 | 0.26583 | -0.48282 | 0.00804 |
| NAGPA    | -0.14695 | 0.12791 | -0.31096 | 0.00158 |
| IL36G    | 0.05888  | 0.78896 | -0.00894 | 0.96526 |
| HSD17B3  | 1.24172  | 0.00147 | 0.77160  | 0.00876 |
| BLOC1S2  | -0.55105 | 0.26759 | -0.50169 | 0.18655 |
| IMPG1    | 0.11537  | 0.41408 | 0.05363  | 0.61488 |
| RNASE3   | -0.80599 | 0.12457 | -1.93968 | 0.00101 |
| LONP1    | 0.70687  | 0.08463 | 1.72095  | 0.00000 |
| ARID3A   | -0.10990 | 0.16655 | -0.07636 | 0.40575 |
| PTPRZ1   | 0.00233  | 0.98854 | -0.13068 | 0.38027 |
| IGDCC3   | -0.09302 | 0.57716 | -0.44537 | 0.00716 |
| IL1R2    | -0.15225 | 0.13006 | -0.13831 | 0.19277 |
| GFER     | 0.74713  | 0.01803 | 1.86644  | 0.00000 |
| THBS2    | 0.28855  | 0.27065 | 0.06460  | 0.78688 |
| PHLDB2   | -0.82709 | 0.06855 | -0.09086 | 0.82925 |
| MAP1LC3A | 0.11153  | 0.52894 | 0.15100  | 0.35070 |

|          |          |         |          |         |
|----------|----------|---------|----------|---------|
| UBE2B    | -0.02406 | 0.88215 | 0.64809  | 0.00014 |
| PRELP    | 0.01728  | 0.88529 | 0.01775  | 0.89525 |
| DAPK2    | -0.14393 | 0.77399 | 1.30229  | 0.00626 |
| SUSD5    | 0.42208  | 0.00048 | 0.22140  | 0.06589 |
| RBP2     | 0.33620  | 0.24328 | 0.45850  | 0.08432 |
| DBI      | -0.05242 | 0.85767 | 0.74325  | 0.01137 |
| DTX3     | 0.32348  | 0.02685 | 0.28025  | 0.05407 |
| ALDH3A1  | 0.35655  | 0.34896 | 1.04256  | 0.00615 |
| LRRC38   | -0.01094 | 0.96222 | 0.20895  | 0.40768 |
| KIR3DL2  | 0.00236  | 0.99272 | -0.12267 | 0.61048 |
| DSCAM    | 0.01169  | 0.93963 | 0.10833  | 0.43998 |
| NECTIN2  | 0.38952  | 0.01310 | 0.16603  | 0.33391 |
| NINJ1    | 0.33966  | 0.12555 | 0.68502  | 0.00170 |
| S100G    | -0.00583 | 0.97940 | -0.29893 | 0.11850 |
| PPCDC    | -0.02916 | 0.87540 | 1.17723  | 0.00000 |
| STK11    | 0.64161  | 0.01640 | 1.91400  | 0.00000 |
| C5       | 0.06560  | 0.32778 | -0.14772 | 0.02779 |
| FBN2     | 0.33949  | 0.18123 | -0.10883 | 0.64797 |
| GPR101   | -0.33388 | 0.26869 | -0.29210 | 0.30916 |
| CCN4     | 0.37136  | 0.03054 | -0.23212 | 0.30325 |
| HMOX2    | -0.02656 | 0.92651 | 0.44197  | 0.10369 |
| SEZ6L    | 0.06142  | 0.66136 | -0.13432 | 0.25517 |
| CEP43    | 0.25090  | 0.32975 | 0.86160  | 0.00062 |
| DLL4     | 0.32007  | 0.13711 | 0.39851  | 0.07663 |
| MORF4L1  | 0.52262  | 0.26994 | 1.10517  | 0.01206 |
| SPINK1   | 0.50995  | 0.12910 | 0.33805  | 0.26320 |
| MPHOSPH8 | 0.01719  | 0.95897 | 1.23926  | 0.00008 |
| ECHS1    | 0.72465  | 0.10318 | 2.08080  | 0.00000 |
| KLRK1    | 0.02164  | 0.88007 | -0.11928 | 0.34547 |
| FAM3D    | 0.58774  | 0.00843 | -0.37085 | 0.06222 |
| HSDL2    | -0.14363 | 0.57270 | 0.38530  | 0.07366 |
| PGF      | 0.31979  | 0.06549 | 0.04524  | 0.85561 |
| GHRHR    | -0.43293 | 0.05155 | -0.00415 | 0.98796 |
| ACTA2    | 0.84120  | 0.00015 | 0.72853  | 0.00400 |
| IL15RA   | 0.28703  | 0.07114 | 0.04096  | 0.79160 |
| PRG3     | -0.07803 | 0.64904 | -0.04664 | 0.76255 |
| CSNK2A1  | 0.13969  | 0.47514 | 0.84667  | 0.00004 |
| ARHGEF12 | 0.28627  | 0.33560 | 0.26147  | 0.33149 |
| CCS      | -0.32390 | 0.14579 | 1.64153  | 0.00000 |
| CD8A     | 0.18753  | 0.36255 | 0.18600  | 0.37224 |
| EPN1     | -0.22107 | 0.39839 | 0.60288  | 0.03720 |
| MPO      | -0.13253 | 0.60653 | -0.70352 | 0.01504 |
| PDCD5    | 0.27025  | 0.23944 | 1.58342  | 0.00000 |
| PAM      | -0.06415 | 0.59322 | -0.32153 | 0.00864 |
| CXCL6    | 0.10333  | 0.65436 | -0.30094 | 0.32096 |
| AXIN1    | 0.16075  | 0.58423 | 0.85602  | 0.00190 |
| HHEX     | -0.05384 | 0.85725 | 0.70334  | 0.00738 |
| TMPRSS5  | -0.09457 | 0.61132 | -0.21242 | 0.25172 |

|          |          |         |          |         |
|----------|----------|---------|----------|---------|
| PTS      | 0.35754  | 0.38589 | 1.62751  | 0.00003 |
| AGRN     | 0.31728  | 0.10491 | 0.10725  | 0.55402 |
| PQBP1    | 0.25813  | 0.43888 | 0.86688  | 0.00396 |
| NME1     | 0.23670  | 0.05444 | 0.00316  | 0.97734 |
| USP8     | 0.11983  | 0.72136 | 1.15947  | 0.00030 |
| PFDN2    | 0.07356  | 0.68947 | 0.07018  | 0.68353 |
| PRSS53   | -0.24123 | 0.07137 | -0.60868 | 0.00000 |
| CCL13    | 0.09565  | 0.62273 | -0.42553 | 0.12176 |
| SEMA4D   | 0.08420  | 0.44725 | -0.55197 | 0.00000 |
| PLA2G7   | -0.02895 | 0.80593 | 0.01775  | 0.90209 |
| ARF6     | -1.02033 | 0.00722 | 0.96567  | 0.00897 |
| GLI2     | 0.08531  | 0.30102 | -0.06742 | 0.40685 |
| GGACT    | -0.14066 | 0.61818 | 0.91507  | 0.00031 |
| ALPP     | 0.26925  | 0.54111 | -0.95393 | 0.00968 |
| ADGRD1   | 0.27105  | 0.11867 | -0.06360 | 0.65886 |
| TNFRSF6B | 0.54582  | 0.08627 | 0.08662  | 0.79239 |
| YES1     | 0.17564  | 0.64071 | 0.59605  | 0.09395 |
| CST5     | 0.17997  | 0.44024 | -0.37657 | 0.15391 |
| PPP1R12B | 0.44648  | 0.34225 | 1.12620  | 0.00298 |
| NRGN     | 0.37185  | 0.29926 | 1.77985  | 0.00000 |
| JMJD1C   | 0.00399  | 0.98388 | -0.16873 | 0.42597 |
| SLK      | 0.00016  | 0.99968 | -0.20650 | 0.60729 |
| GFRAL    | 0.01067  | 0.96142 | -0.01396 | 0.93685 |
| SLC39A14 | 0.28598  | 0.28970 | 0.25166  | 0.34605 |
| VPS28    | 0.21218  | 0.40198 | 0.74431  | 0.00450 |
| CHRDL1   | 0.07354  | 0.60655 | 0.78002  | 0.00014 |
| IL21R    | 0.11197  | 0.56177 | -0.25084 | 0.15835 |
| CD300LF  | 0.22206  | 0.33968 | 0.26677  | 0.36311 |
| CAMKK1   | 0.25015  | 0.35338 | 1.28318  | 0.00000 |
| EIF5     | 0.08347  | 0.75601 | 1.37376  | 0.00000 |
| MANEAL   | 0.05969  | 0.75402 | 0.17125  | 0.32418 |
| TFAP2A   | -0.06108 | 0.86424 | 0.23050  | 0.55793 |
| HSD11B1  | 0.15560  | 0.26377 | -0.34747 | 0.00966 |
| SNX9     | 0.15683  | 0.51155 | 0.83296  | 0.00057 |
| FGF20    | -0.03115 | 0.83219 | 0.07094  | 0.49499 |
| CD34     | -0.18483 | 0.09873 | -0.36851 | 0.00143 |
| CMIP     | -0.00668 | 0.98398 | 0.12755  | 0.67729 |
| PODXL    | -0.04320 | 0.51157 | -0.22497 | 0.30130 |
| CD99L2   | 0.06535  | 0.50852 | 0.02096  | 0.86126 |
| MAN1A2   | 0.03916  | 0.75486 | -0.29447 | 0.00979 |
| TOP2B    | 0.34849  | 0.34560 | 0.49750  | 0.16827 |
| RAB6B    | -0.07923 | 0.59097 | -0.59477 | 0.00025 |
| NPDC1    | 0.35237  | 0.06049 | 0.42937  | 0.02427 |
| NFKBIE   | 0.22045  | 0.40397 | 0.69363  | 0.00890 |
| IL6R     | 0.23402  | 0.02634 | 0.06772  | 0.55118 |
| CRHR1    | 0.47915  | 0.02662 | -0.02525 | 0.92564 |
| CALCOCO1 | -0.10349 | 0.78066 | -0.73693 | 0.04606 |
| GCG      | 0.27312  | 0.54292 | -0.53795 | 0.30136 |

|          |          |         |          |         |
|----------|----------|---------|----------|---------|
| CEACAM5  | 1.00914  | 0.02201 | 0.88288  | 0.01751 |
| SMAD5    | -0.20099 | 0.14979 | -0.27645 | 0.08792 |
| FCRL6    | 0.35900  | 0.08088 | -0.36018 | 0.10883 |
| IGFBP7   | 0.17976  | 0.14580 | 0.00630  | 0.96364 |
| RBP1     | 0.74989  | 0.05415 | 0.82483  | 0.04704 |
| SPINK4   | 0.53518  | 0.04401 | 0.33036  | 0.16937 |
| GOPC     | 0.01963  | 0.95226 | 2.22046  | 0.00000 |
| FNTA     | -0.07843 | 0.66714 | 0.55998  | 0.00294 |
| ING1     | -0.06151 | 0.84577 | 0.59653  | 0.06189 |
| SMPD1    | 0.27436  | 0.07378 | 0.17665  | 0.27242 |
| SNRPB2   | 0.49344  | 0.32118 | 0.56659  | 0.25137 |
| SIRT5    | -0.34332 | 0.08199 | -0.10462 | 0.63315 |
| ARHGAP45 | 0.05560  | 0.84945 | 0.71675  | 0.00468 |
| PARK7    | 0.04761  | 0.82393 | 1.38023  | 0.00000 |
| AP3S2    | 0.09896  | 0.70774 | 0.03504  | 0.87688 |
| BAP18    | -0.01373 | 0.97286 | 0.49314  | 0.22025 |
| ATP6V1G1 | -0.44082 | 0.14804 | 1.26809  | 0.00001 |
| DNAJC6   | 0.67264  | 0.05874 | 2.02702  | 0.00000 |
| ITGB5    | 0.19753  | 0.33993 | 0.85027  | 0.00004 |
| PSMD5    | -0.04780 | 0.77818 | 0.54696  | 0.00101 |
| IFT20    | -0.14819 | 0.54010 | -0.19134 | 0.37595 |
| H2AP     | 0.38230  | 0.12541 | 0.01320  | 0.94711 |
| GIPC2    | 0.59745  | 0.00904 | 0.11380  | 0.58061 |
| CDC25A   | 0.05204  | 0.83627 | -0.27178 | 0.15293 |
| HSPG2    | 0.02291  | 0.87930 | -0.08160 | 0.59095 |
| PARP1    | 0.63446  | 0.10716 | 1.70586  | 0.00002 |
| OTUD7B   | 0.35699  | 0.12680 | 1.33217  | 0.00000 |
| PRSS22   | 0.11265  | 0.70353 | 0.16332  | 0.35608 |
| PDCD1LG2 | 0.36810  | 0.00205 | -0.03902 | 0.79190 |
| CA7      | -0.14381 | 0.55370 | 0.05660  | 0.83130 |
| CDH23    | 0.20405  | 0.13475 | -1.20999 | 0.00000 |
| FCER2    | -0.29497 | 0.08470 | -0.28718 | 0.13843 |
| CRTAM    | 0.14032  | 0.45618 | -0.16474 | 0.41417 |
| SLC51B   | 0.04519  | 0.82585 | -0.08308 | 0.72503 |
| PKD1     | 0.10535  | 0.37082 | -0.10994 | 0.33111 |
| STK4     | 0.26453  | 0.41063 | 2.17926  | 0.00000 |
| MYOC     | -0.54802 | 0.01377 | -0.65328 | 0.00415 |
| ITIH1    | -0.09754 | 0.23731 | -0.33259 | 0.00021 |
| NECAP2   | -0.09641 | 0.71706 | 1.39250  | 0.00000 |
| FCGR2B   | -0.08004 | 0.73216 | -0.15382 | 0.52904 |
| PFDN6    | 0.23893  | 0.62957 | -0.03233 | 0.94825 |
| B3GNT7   | -0.03329 | 0.77657 | -0.24791 | 0.04338 |
| DCN      | 0.19152  | 0.10889 | -0.06405 | 0.62919 |
| CEP152   | -0.26274 | 0.44896 | -0.04182 | 0.90821 |
| POMC     | -0.22183 | 0.55338 | 1.02946  | 0.03127 |
| CEACAM16 | -1.56094 | 0.00000 | -0.48035 | 0.06867 |
| PCDH12   | -0.05723 | 0.57819 | -0.41102 | 0.00001 |
| TCOF1    | 0.50184  | 0.12378 | 0.84262  | 0.00222 |

|          |          |         |          |         |
|----------|----------|---------|----------|---------|
| FKBP4    | 0.22458  | 0.22709 | 0.95655  | 0.00000 |
| MEP1B    | -1.12039 | 0.00026 | -0.03790 | 0.90462 |
| CPA4     | -0.26925 | 0.12020 | -0.44154 | 0.00546 |
| APEX1    | 0.14955  | 0.60933 | 0.57536  | 0.11020 |
| IL15     | -0.14467 | 0.35778 | -0.05280 | 0.78596 |
| DDHD2    | 0.02215  | 0.91451 | 0.84740  | 0.00001 |
| CRISP2   | 0.11711  | 0.51331 | -0.51987 | 0.06070 |
| CLPP     | 0.78623  | 0.03147 | 1.82315  | 0.00000 |
| CLEC11A  | -0.05519 | 0.71252 | -0.05791 | 0.72063 |
| IL18R1   | 0.21767  | 0.17479 | 0.05822  | 0.80383 |
| MAEA     | -0.17146 | 0.45014 | 0.37579  | 0.08874 |
| VSTM2L   | -0.06787 | 0.73140 | -0.20182 | 0.27682 |
| NECTIN4  | 0.39648  | 0.08095 | 0.05350  | 0.78018 |
| TRAF3IP2 | -0.10042 | 0.68421 | -0.15947 | 0.50097 |
| EPGN     | 0.17562  | 0.24045 | 0.02502  | 0.84437 |
| TCN2     | 0.13265  | 0.23236 | 0.11160  | 0.37271 |
| PTPN9    | -0.28041 | 0.21783 | 0.46287  | 0.07066 |
| IRAK1    | -0.09236 | 0.69385 | 0.16794  | 0.44342 |
| RGMB     | -0.08045 | 0.53080 | 0.03163  | 0.79242 |
| SHISA5   | 0.26664  | 0.21527 | 0.24899  | 0.18804 |
| ROBO1    | -0.00339 | 0.98178 | -0.14339 | 0.32690 |
| ZBTB17   | 0.16909  | 0.46737 | 0.91197  | 0.00024 |
| SCARA5   | 0.12863  | 0.47912 | -0.08631 | 0.62466 |
| CXCL3    | -0.26640 | 0.38326 | -0.16965 | 0.52305 |
| PDCD1    | 0.17108  | 0.24152 | -0.00169 | 0.99319 |
| VCPKMT   | 0.59588  | 0.02256 | -0.07928 | 0.78682 |
| MET      | 0.00085  | 0.99264 | -0.01692 | 0.87499 |
| RILP     | 0.26928  | 0.22949 | 2.05158  | 0.00000 |
| TDRKH    | 0.51719  | 0.09884 | 1.42505  | 0.00001 |
| FCN2     | 0.15480  | 0.40019 | -0.16191 | 0.42036 |
| CXCL17   | 0.59466  | 0.00780 | 0.37589  | 0.15601 |
| GUCA2A   | 0.34424  | 0.02421 | -0.01678 | 0.92342 |
| SYTL4    | 0.19074  | 0.64243 | 0.69045  | 0.07630 |
| NDRG1    | -0.27196 | 0.21111 | 0.67527  | 0.00287 |
| SPRR1B   | 1.26506  | 0.07712 | -0.36861 | 0.59235 |
| CD93     | -0.00169 | 0.98909 | -0.23649 | 0.08998 |
| NFE2     | -0.15602 | 0.60314 | 0.81604  | 0.00300 |
| GDF2     | -0.15360 | 0.36346 | -0.46491 | 0.01809 |
| PDXDC1   | 0.20259  | 0.16974 | 0.04256  | 0.78570 |
| MKI67    | 0.53937  | 0.22797 | 1.00647  | 0.02349 |
| METAP1   | -0.08884 | 0.42169 | -0.18675 | 0.05412 |
| KLK13    | -0.42479 | 0.02190 | -0.52992 | 0.01855 |
| FGF23    | 0.76626  | 0.08661 | 1.85782  | 0.00004 |
| ERBB2    | -0.09717 | 0.48840 | -0.10313 | 0.28604 |
| SNX2     | 0.49381  | 0.10741 | 2.56410  | 0.00000 |
| MARCO    | 0.23069  | 0.02926 | 0.01811  | 0.88068 |
| SMOC2    | 0.06505  | 0.66961 | -0.05609 | 0.72772 |
| ANGPTL2  | -0.03537 | 0.86076 | 0.43567  | 0.02834 |

|          |          |         |          |         |
|----------|----------|---------|----------|---------|
| CD5      | 0.08250  | 0.54471 | -0.18695 | 0.38605 |
| PAIP2B   | 0.07317  | 0.81639 | 0.27027  | 0.28065 |
| KLK15    | -0.16663 | 0.30613 | 0.02573  | 0.85686 |
| THBD     | 0.02464  | 0.84905 | -0.05176 | 0.70226 |
| RAP1A    | 0.00256  | 0.99376 | -0.15202 | 0.63837 |
| HADH     | 0.07725  | 0.79703 | 0.18832  | 0.47748 |
| PENK     | 0.00903  | 0.94988 | -0.12160 | 0.45902 |
| DRAXIN   | -0.00289 | 0.98933 | 0.11296  | 0.60393 |
| CA5A     | 0.46020  | 0.40962 | 1.39451  | 0.00273 |
| PCBD1    | 0.08135  | 0.80562 | 1.16977  | 0.00005 |
| GRIN2B   | 0.13014  | 0.54030 | 0.13258  | 0.57369 |
| CABP2    | -0.07657 | 0.79047 | 0.09763  | 0.70662 |
| ZP4      | 0.19242  | 0.46543 | -0.47898 | 0.06613 |
| CDKN1A   | 0.30124  | 0.37524 | 1.52071  | 0.00010 |
| ADAM12   | 0.84443  | 0.00511 | 0.05230  | 0.83707 |
| VAT1     | -0.17758 | 0.14732 | 0.13406  | 0.31345 |
| DENR     | 0.35573  | 0.14982 | 1.45736  | 0.00000 |
| LILRA4   | 0.12733  | 0.60761 | -0.01882 | 0.93904 |
| PROC     | 0.06865  | 0.57827 | -0.14781 | 0.28676 |
| MTDH     | 0.63896  | 0.05781 | 2.02683  | 0.00000 |
| LGALS3BP | 0.24044  | 0.10065 | 0.25387  | 0.07604 |
| FH       | -0.05743 | 0.89956 | 0.23697  | 0.55069 |
| CEP164   | -0.01489 | 0.94797 | 0.27677  | 0.15807 |
| ASPSCR1  | -0.03795 | 0.83826 | 1.15330  | 0.00000 |
| MPRIIP   | -0.05222 | 0.70326 | 0.10779  | 0.39606 |
| OPHN1    | 0.38952  | 0.25489 | 1.98935  | 0.00000 |
| CELA3A   | 0.06173  | 0.82907 | -0.34858 | 0.19034 |
| DIPK1C   | 0.26119  | 0.14176 | -0.24493 | 0.35224 |
| MSLN     | 0.33528  | 0.12137 | -0.74523 | 0.00139 |
| C9orf40  | 0.16907  | 0.48836 | 2.00552  | 0.00000 |
| THBS4    | -0.10857 | 0.62454 | -0.57570 | 0.00983 |
| MED21    | 0.06835  | 0.72478 | 0.27499  | 0.07631 |
| C1RL     | 0.05188  | 0.52932 | -0.11146 | 0.26525 |
| DLGAP5   | 0.49118  | 0.07512 | -0.12171 | 0.61997 |
| TNFRSF8  | 0.40756  | 0.02010 | 0.13883  | 0.50342 |
| CASP8    | -0.68019 | 0.06519 | 0.28518  | 0.44957 |
| MYH4     | 0.25509  | 0.44680 | -0.42273 | 0.09947 |
| OMD      | -0.43275 | 0.00583 | 0.10801  | 0.53855 |
| GCNT1    | 0.31600  | 0.02309 | -0.07112 | 0.70600 |
| IL4      | 0.80852  | 0.16892 | -1.17483 | 0.03075 |
| CD244    | 0.01901  | 0.85969 | -0.04486 | 0.76463 |
| HTRA2    | 0.23244  | 0.35629 | 1.15863  | 0.00000 |
| CD28     | 0.14909  | 0.33942 | -0.43074 | 0.00970 |
| DAB2     | 0.34153  | 0.29207 | 2.12331  | 0.00000 |
| ARG2     | 0.66226  | 0.01470 | 0.32863  | 0.18049 |
| SOX9     | 1.00869  | 0.00786 | 1.15367  | 0.00366 |
| AHNAK    | 0.17548  | 0.30220 | 0.39791  | 0.01439 |
| IFNAR1   | -0.09818 | 0.18122 | -0.00816 | 0.91050 |



|          |          |         |          |         |
|----------|----------|---------|----------|---------|
| F12      | -0.04370 | 0.70489 | -0.10578 | 0.41005 |
| RPA2     | -0.10113 | 0.69714 | 0.31798  | 0.17526 |
| SLAMF6   | 0.40533  | 0.02637 | 0.14935  | 0.42817 |
| POSTN    | 0.38890  | 0.02034 | 0.08056  | 0.62105 |
| CA2      | 0.26780  | 0.31279 | 1.85847  | 0.00000 |
| GFOD2    | -0.24258 | 0.40734 | -0.06896 | 0.82603 |
| KLK3     | 0.46211  | 0.22879 | -0.09795 | 0.51330 |
| ENO1     | -0.02057 | 0.93514 | 2.13382  | 0.00000 |
| TEX101   | -0.32386 | 0.28017 | -0.32896 | 0.16077 |
| CSH1     | 0.07496  | 0.79899 | 0.41038  | 0.05411 |
| CTSF     | 0.34370  | 0.03762 | 0.21172  | 0.22527 |
| TRIM26   | -0.27841 | 0.29031 | 0.09302  | 0.75652 |
| DSG3     | -0.16689 | 0.25805 | -0.54991 | 0.01071 |
| CD177    | 0.30188  | 0.48707 | -0.04235 | 0.92171 |
| SNAP25   | 0.28272  | 0.23650 | 0.06399  | 0.72383 |
| FAM13A   | 0.41115  | 0.16542 | 0.70196  | 0.01002 |
| YJU2     | 0.12320  | 0.56961 | 0.57680  | 0.00624 |
| CD86     | -0.17867 | 0.15664 | -0.40124 | 0.00221 |
| CANT1    | 0.13819  | 0.15949 | -0.21540 | 0.05301 |
| LRTM2    | -0.01635 | 0.87485 | -0.01485 | 0.91176 |
| ARSB     | -0.31506 | 0.22115 | -0.74988 | 0.01156 |
| MST1     | -0.13035 | 0.33927 | 0.03361  | 0.83900 |
| JAM2     | 0.00820  | 0.94703 | -0.03165 | 0.80851 |
| LEFTY2   | 0.30477  | 0.15542 | -0.50661 | 0.05045 |
| ICAM1    | 0.34912  | 0.03292 | 0.08476  | 0.62291 |
| SPINK6   | -0.12627 | 0.48167 | -0.02765 | 0.89259 |
| CYP24A1  | 0.07165  | 0.82335 | -0.02554 | 0.92749 |
| CRHBP    | -0.10673 | 0.37543 | -0.07031 | 0.64299 |
| ITGB1BP1 | 0.26563  | 0.32974 | 0.39125  | 0.10925 |
| TK1      | 0.20914  | 0.34535 | 0.36547  | 0.18929 |
| CNTNAP4  | 0.33253  | 0.17808 | 0.18018  | 0.46383 |
| CHRM1    | -0.14124 | 0.51316 | -0.30209 | 0.19999 |
| CAPG     | 0.01507  | 0.96283 | 0.63503  | 0.04073 |
| SETMAR   | -0.16987 | 0.44071 | 0.52204  | 0.02021 |
| PTPRK    | 0.23546  | 0.05142 | -0.01420 | 0.87665 |
| TBR1     | 0.15190  | 0.45904 | -0.03964 | 0.85781 |
| GLRX     | -0.04721 | 0.83214 | 0.95791  | 0.00005 |
| TNFSF13B | 0.19543  | 0.19981 | -0.01107 | 0.94774 |
| THTPA    | -0.00878 | 0.97660 | 1.26554  | 0.00000 |
| TIMP1    | 0.45710  | 0.01299 | 0.01952  | 0.92054 |
| NPHS2    | 0.16571  | 0.61900 | 0.32173  | 0.29660 |
| CCL14    | 0.30192  | 0.02319 | -0.05367 | 0.69292 |
| MTSS2    | 0.49809  | 0.13241 | 1.92095  | 0.00000 |
| SUSD1    | 0.35302  | 0.09301 | 0.05056  | 0.80865 |
| PON3     | -0.55899 | 0.01333 | -0.16194 | 0.39877 |
| PRTFDC1  | 0.12617  | 0.76260 | 2.71103  | 0.00000 |
| SCN3A    | 0.03003  | 0.92564 | -0.75225 | 0.01173 |
| LAG3     | 0.19295  | 0.25018 | -0.04097 | 0.83146 |

|               |          |         |          |         |
|---------------|----------|---------|----------|---------|
| FARSA         | 0.16150  | 0.67830 | 1.17379  | 0.00076 |
| CGN           | 0.77555  | 0.00926 | 0.73809  | 0.00343 |
| DUOX2         | 0.39054  | 0.11851 | -0.31653 | 0.29630 |
| RNF4          | 0.15090  | 0.79837 | -0.48419 | 0.42569 |
| IZUMO1        | 0.35426  | 0.08992 | -0.11311 | 0.55854 |
| GMPR2         | -0.09885 | 0.69965 | 1.60892  | 0.00000 |
| DEFB116       | 0.51837  | 0.03660 | -0.16412 | 0.49091 |
| TP53          | 0.22767  | 0.44006 | 0.56669  | 0.05687 |
| SUMF2         | -0.11200 | 0.51088 | 0.01720  | 0.91924 |
| FEN1          | -0.05695 | 0.91151 | -0.15925 | 0.76708 |
| SIGLEC1       | 0.46223  | 0.01798 | 0.19851  | 0.32666 |
| DCTPP1        | 0.20924  | 0.36806 | 0.16101  | 0.43609 |
| SLC44A4       | 0.12280  | 0.69268 | 0.12927  | 0.68837 |
| DIABLO        | 0.17411  | 0.66850 | 1.85414  | 0.00001 |
| PDAP1         | 0.38536  | 0.25004 | 2.12147  | 0.00000 |
| TACC3         | -0.58004 | 0.13026 | 0.52331  | 0.14679 |
| SELP          | -0.03554 | 0.86714 | -0.21067 | 0.32345 |
| SERPINI2      | 0.01790  | 0.93789 | -0.06547 | 0.75747 |
| SPTBN2        | 0.10050  | 0.62977 | 0.72487  | 0.00004 |
| ADAM22        | 0.03691  | 0.84580 | -0.35359 | 0.11650 |
| COL2A1        | -0.23002 | 0.42126 | -1.08005 | 0.00013 |
| FGL1          | 1.00153  | 0.00218 | 2.19805  | 0.00000 |
| SERPINB5      | -0.02385 | 0.95173 | -0.61239 | 0.07727 |
| GCC1          | 0.01262  | 0.96965 | 1.69411  | 0.00000 |
| CPE           | -0.09144 | 0.45985 | -0.33330 | 0.01551 |
| ESAM          | 0.20493  | 0.11172 | -0.21799 | 0.07587 |
| CXCL16        | 0.05489  | 0.62872 | -0.03098 | 0.79882 |
| MAPKAPK2      | -0.26360 | 0.36164 | 0.17820  | 0.55044 |
| CASP10        | -0.21213 | 0.54376 | 0.70607  | 0.04558 |
| ATG4A         | 0.23563  | 0.30980 | 1.60342  | 0.00000 |
| RBM17         | 0.28341  | 0.38888 | 1.89001  | 0.00000 |
| NUDT2         | -0.70550 | 0.00239 | 0.23480  | 0.25891 |
| ELAVL4        | 0.58826  | 0.12973 | 0.54888  | 0.02066 |
| ENPP6         | -0.49635 | 0.00688 | -0.75190 | 0.00000 |
| ICAM4         | -0.03638 | 0.84080 | -0.38018 | 0.03863 |
| FRMD4B        | -0.10734 | 0.72623 | -0.01285 | 0.96369 |
| STEAP4        | -0.01316 | 0.95917 | -0.59838 | 0.03297 |
| FLT3LG        | 0.25860  | 0.14162 | -0.41268 | 0.04768 |
| IL1RL1        | 0.56894  | 0.09991 | 0.53391  | 0.13582 |
| TBCB          | -0.08280 | 0.80993 | 1.52220  | 0.00004 |
| DEFA1B; DEFA1 | 0.09329  | 0.76401 | 0.23800  | 0.43616 |
| HAO1          | 0.27865  | 0.58262 | 1.60581  | 0.00042 |
| BMPER         | -0.03316 | 0.76883 | -0.11436 | 0.27762 |
| UBXN1         | 0.05518  | 0.82644 | 1.88961  | 0.00000 |
| HSP90B1       | 0.07537  | 0.74248 | -0.19781 | 0.47221 |
| EFHD1         | 0.46863  | 0.04328 | 0.28244  | 0.23718 |
| TNFSF10       | -0.11962 | 0.37734 | -0.48095 | 0.03775 |
| ANGPTL1       | 0.16078  | 0.24294 | 0.12464  | 0.38651 |

|          |          |         |          |         |
|----------|----------|---------|----------|---------|
| TPT1     | -0.10250 | 0.78527 | -0.37237 | 0.25675 |
| CES2     | -0.17042 | 0.36902 | -1.74786 | 0.00000 |
| INSL3    | -0.04699 | 0.91360 | -0.25109 | 0.40448 |
| ISM1     | 0.11729  | 0.44793 | 0.01002  | 0.95809 |
| SMAD2    | 0.51411  | 0.16704 | 1.75560  | 0.00000 |
| HBZ      | -0.16393 | 0.68604 | 0.95250  | 0.01046 |
| NT5C1A   | 0.82020  | 0.03130 | 1.76421  | 0.00001 |
| MYOM2    | -0.57566 | 0.19339 | -0.13996 | 0.71301 |
| ATP5F1D  | 0.95090  | 0.01027 | 0.35772  | 0.26063 |
| HPCAL1   | 0.03413  | 0.88415 | 1.25951  | 0.00003 |
| CSF2RA   | 0.08119  | 0.66071 | 0.03258  | 0.86311 |
| ARTN     | 0.05061  | 0.77416 | 0.12985  | 0.37071 |
| GMPR     | 0.36791  | 0.09355 | 2.35376  | 0.00000 |
| RPL14    | 0.36285  | 0.10424 | 1.07874  | 0.00000 |
| BMP10    | -0.11585 | 0.31579 | -0.12031 | 0.31867 |
| CLSTN3   | -0.20244 | 0.17529 | -0.34128 | 0.00660 |
| SHH      | 0.09158  | 0.53000 | -0.06525 | 0.55662 |
| FSTL1    | 0.06991  | 0.42812 | -0.01186 | 0.87720 |
| CFC1     | -0.14298 | 0.39675 | -0.07856 | 0.62154 |
| DAAM1    | 0.22779  | 0.46253 | 0.71373  | 0.01639 |
| SORD     | -0.05398 | 0.89504 | 2.62302  | 0.00000 |
| LPO      | -0.13862 | 0.52281 | 0.20830  | 0.38615 |
| AHCY     | -0.27907 | 0.32942 | 0.90803  | 0.00125 |
| PDLIM7   | -0.40099 | 0.29720 | 0.47597  | 0.21761 |
| CEBPA    | 0.03285  | 0.86683 | 0.53731  | 0.02302 |
| PILRB    | 0.31259  | 0.07854 | 0.22246  | 0.23190 |
| NDUFB7   | 0.03739  | 0.90425 | 0.93969  | 0.00095 |
| NELL1    | -0.49368 | 0.00540 | -0.30972 | 0.04205 |
| NLGN2    | 0.20842  | 0.38200 | -0.13151 | 0.55986 |
| YTHDF3   | 0.33365  | 0.32594 | 2.15259  | 0.00000 |
| ADAMTSL4 | 0.45443  | 0.00781 | 0.46584  | 0.00334 |
| NPL      | 0.30741  | 0.26437 | 0.46594  | 0.06306 |
| STXBP3   | -0.22468 | 0.45902 | 1.63000  | 0.00000 |
| TMED1    | -0.38550 | 0.57804 | 0.15802  | 0.81911 |
| CTSC     | -0.36539 | 0.04012 | -0.64361 | 0.00051 |
| LAMP2    | -0.10834 | 0.20651 | -0.17287 | 0.07810 |
| MTSS1    | -0.24552 | 0.51357 | -1.29354 | 0.00019 |
| SSC5D    | 0.23946  | 0.12498 | 0.21016  | 0.16854 |
| SCGN     | 0.36359  | 0.06984 | 0.11694  | 0.44916 |
| DPP7     | -0.18218 | 0.46973 | -0.34480 | 0.10437 |
| INSL4    | 0.37954  | 0.30226 | 0.22951  | 0.36260 |
| BGLAP    | -0.39882 | 0.36262 | -0.39670 | 0.36999 |
| APOD     | -0.00874 | 0.94670 | -0.24951 | 0.04016 |
| SEMA3F   | -0.04930 | 0.70405 | 0.12946  | 0.32650 |
| CLEC7A   | 0.72662  | 0.00109 | 0.20049  | 0.35032 |
| VSIR     | -0.35202 | 0.25678 | -0.42196 | 0.19932 |
| TREML2   | 0.02728  | 0.84049 | -0.51551 | 0.00015 |
| AHSA1    | 0.20202  | 0.34334 | 1.25218  | 0.00000 |

|          |          |         |          |         |
|----------|----------|---------|----------|---------|
| NFU1     | 0.36759  | 0.35073 | 2.03739  | 0.00000 |
| IL18RAP  | -0.43943 | 0.27176 | 0.19123  | 0.67076 |
| SCP2     | 0.06964  | 0.84354 | 0.38479  | 0.19233 |
| SULT1A1  | 0.17395  | 0.64581 | 1.56704  | 0.00013 |
| DCLRE1C  | 0.28392  | 0.07743 | -0.28941 | 0.11788 |
| CACNA1C  | 0.39198  | 0.17389 | -0.22311 | 0.25747 |
| LILRB5   | -0.08979 | 0.70399 | 0.10131  | 0.66010 |
| CLINT1   | 0.36874  | 0.11334 | -0.05318 | 0.84648 |
| LAMTOR5  | 0.05633  | 0.85432 | 0.77219  | 0.01023 |
| ATP1B4   | 0.14635  | 0.37708 | -0.25565 | 0.13867 |
| ASGR2    | 0.38859  | 0.02740 | 0.09007  | 0.57370 |
| CLEC14A  | 0.10787  | 0.43845 | 0.05597  | 0.69252 |
| BCAT2    | 0.02295  | 0.92315 | 0.08927  | 0.70061 |
| GPR15L   | 0.14590  | 0.51516 | -0.04114 | 0.82787 |
| IQGAP2   | -0.92037 | 0.01191 | -0.97009 | 0.00362 |
| CPA2     | 0.20181  | 0.51887 | -0.70638 | 0.01923 |
| ANXA3    | 0.07155  | 0.81455 | 1.43661  | 0.00001 |
| KAZN     | -0.06518 | 0.84996 | 0.46245  | 0.15857 |
| TXN      | -0.09696 | 0.65666 | 0.74721  | 0.00006 |
| VEGFA    | 0.42831  | 0.05443 | -0.22277 | 0.42975 |
| DDX53    | -0.03932 | 0.71557 | 0.03262  | 0.81521 |
| ZNRD2    | 0.69606  | 0.05122 | 0.85186  | 0.00454 |
| F13B     | -0.06232 | 0.28934 | -0.00240 | 0.97775 |
| IL10     | 0.46851  | 0.37121 | 1.61800  | 0.00333 |
| FRMD7    | 0.15665  | 0.21953 | 0.00793  | 0.95230 |
| AOC3     | -0.02671 | 0.81821 | -0.31229 | 0.01383 |
| HMMR     | -0.11747 | 0.71429 | -0.10946 | 0.68572 |
| ERMAP    | 0.36474  | 0.09130 | 0.28023  | 0.09192 |
| CIT      | 0.65783  | 0.04536 | 1.21862  | 0.00000 |
| DNAJB6   | -0.68151 | 0.02374 | -0.35910 | 0.20820 |
| COQ7     | 0.13410  | 0.55217 | 0.59954  | 0.00167 |
| RAB3GAP1 | 0.08794  | 0.70863 | -0.05939 | 0.82663 |
| DUSP3    | -0.63987 | 0.06139 | -0.05931 | 0.86692 |
| TXNDC9   | 0.38299  | 0.23556 | 1.25767  | 0.00003 |
| RTKN2    | -0.00365 | 0.99089 | -0.60433 | 0.04491 |
| NMT1     | 0.03838  | 0.90629 | 1.66080  | 0.00000 |
| STX1B    | 0.13941  | 0.41786 | 0.05870  | 0.70050 |
| DPP6     | -0.09722 | 0.48293 | -0.28760 | 0.07237 |
| HEPACAM2 | 0.15609  | 0.34072 | 0.07716  | 0.62610 |
| SLAMF8   | 0.60585  | 0.03457 | 0.28178  | 0.29483 |
| POLR2A   | 0.16071  | 0.26572 | -0.13011 | 0.51897 |
| PCOLCE   | 0.06076  | 0.71254 | -0.19813 | 0.22222 |
| LRPAP1   | 0.26186  | 0.16141 | 0.17509  | 0.35461 |
| ITGB1    | -0.08605 | 0.35272 | -0.10765 | 0.39333 |
| RECK     | -0.08490 | 0.32672 | -0.31040 | 0.00025 |
| LAMB1    | 0.16192  | 0.18855 | 0.02228  | 0.84526 |
| GPD1     | -0.20565 | 0.54724 | 0.03889  | 0.90253 |
| AKR1C4   | 0.24110  | 0.54488 | 0.76170  | 0.06342 |

|           |          |         |          |         |
|-----------|----------|---------|----------|---------|
| ATP6V1D   | 0.00698  | 0.95568 | 0.24055  | 0.01888 |
| CCDC80    | 0.26028  | 0.12414 | 0.09922  | 0.66455 |
| GIP       | 0.50036  | 0.00370 | -0.02508 | 0.85773 |
| MFAP3L    | -0.37369 | 0.12840 | -0.24099 | 0.32761 |
| ITGB2     | -0.23072 | 0.07117 | 0.21758  | 0.15168 |
| FGF7      | -0.04643 | 0.84884 | 0.26752  | 0.26074 |
| CDON      | -0.27173 | 0.08108 | -0.37575 | 0.02914 |
| INPP1     | -0.18002 | 0.49221 | 0.96733  | 0.00267 |
| NFAT5     | 0.56030  | 0.13786 | -0.10560 | 0.71241 |
| PDGFA     | 0.18999  | 0.42392 | -0.82465 | 0.00015 |
| TBC1D23   | -0.47051 | 0.12047 | -0.60766 | 0.03364 |
| AMIGO1    | -0.10492 | 0.64612 | -0.11465 | 0.67471 |
| STX7      | 0.22773  | 0.20629 | -0.04748 | 0.78630 |
| CDHR5     | 0.01103  | 0.92982 | -0.00430 | 0.97571 |
| MN1       | 0.24560  | 0.53021 | -0.30388 | 0.42320 |
| LYPLA2    | -0.23739 | 0.51269 | -0.43289 | 0.17972 |
| TSNAX     | -0.11844 | 0.57970 | 0.85138  | 0.00001 |
| TIMD4     | 0.27715  | 0.18185 | 0.17077  | 0.41220 |
| HSPA1A    | -0.30846 | 0.29762 | 1.40013  | 0.00000 |
| TXK       | 0.03943  | 0.86196 | -0.39595 | 0.09313 |
| NPPB      | 2.05783  | 0.00052 | 1.56936  | 0.00313 |
| DFFA      | 0.14817  | 0.56266 | 1.30608  | 0.00003 |
| THOP1     | 0.17607  | 0.40039 | 0.49198  | 0.00700 |
| IGSF8     | 0.46169  | 0.00354 | 0.38468  | 0.01345 |
| MICB_MICA | -0.02737 | 0.94875 | 0.83853  | 0.06693 |
| CRTAC1    | -0.06248 | 0.69949 | -0.61823 | 0.00023 |
| NME3      | -0.09778 | 0.38691 | -0.09575 | 0.43426 |
| GPRC5C    | 0.93391  | 0.03381 | 0.48465  | 0.23898 |
| DIPK2B    | -0.17935 | 0.10852 | 0.02767  | 0.77173 |
| CWC15     | 0.16589  | 0.64208 | 1.07824  | 0.00272 |
| LILRA2    | 0.07745  | 0.55246 | 0.04497  | 0.73992 |
| GP1BA     | 0.00774  | 0.94876 | -0.25541 | 0.05802 |
| PITHD1    | 0.48299  | 0.10852 | -0.08063 | 0.77264 |
| CD74      | 0.51442  | 0.00092 | 0.31398  | 0.06755 |
| CINP      | -0.26667 | 0.43701 | -0.03400 | 0.92313 |
| ATP1B3    | 0.22721  | 0.24190 | 0.21907  | 0.22922 |
| ALPI      | 0.41269  | 0.34954 | -0.90071 | 0.03311 |
| SEZ6L2    | 0.42258  | 0.01364 | -0.25706 | 0.22518 |
| ICAM2     | 0.26939  | 0.03528 | 0.03547  | 0.79008 |
| HIP1      | -0.33161 | 0.10086 | 0.19502  | 0.33965 |
| KLK4      | 1.59509  | 0.00010 | 0.45314  | 0.16588 |
| AHNAK2    | 0.12067  | 0.35837 | 0.14926  | 0.33621 |
| FCRL1     | -0.23596 | 0.10366 | -0.48565 | 0.00080 |
| CCN2      | 0.23061  | 0.14432 | -0.22480 | 0.15526 |
| DGCR6     | 0.25656  | 0.31735 | 0.03936  | 0.86925 |
| CEBPB     | -0.00678 | 0.98109 | -0.52036 | 0.06122 |
| LEPR      | 0.33141  | 0.03410 | -0.07548 | 0.58119 |
| DDT       | 0.05674  | 0.78356 | 1.47109  | 0.00000 |

|          |          |         |          |         |
|----------|----------|---------|----------|---------|
| ITGA6    | 0.35379  | 0.05029 | 0.84691  | 0.00003 |
| CHEK2    | -0.21947 | 0.50936 | 0.21191  | 0.54978 |
| NPM1     | 0.04574  | 0.90636 | 0.52867  | 0.15085 |
| DNAJB1   | 0.15156  | 0.61439 | 2.44334  | 0.00000 |
| SEMA7A   | 0.02877  | 0.84165 | -0.04082 | 0.77298 |
| SPARC    | 0.25828  | 0.24692 | -0.86831 | 0.00005 |
| SCARF1   | 0.16916  | 0.36334 | -0.46713 | 0.01437 |
| PLG      | -0.03682 | 0.72228 | -0.11961 | 0.30268 |
| TARBP2   | 0.17137  | 0.56821 | 0.94873  | 0.00035 |
| STAM     | -0.60170 | 0.04694 | -0.85929 | 0.00173 |
| NFYA     | 0.60052  | 0.05142 | 0.47061  | 0.09474 |
| RNF5     | 0.03193  | 0.90568 | 0.89805  | 0.00094 |
| ACHE     | 0.23275  | 0.32711 | 0.03707  | 0.86306 |
| RASGRF1  | -0.12201 | 0.63979 | -0.49698 | 0.06751 |
| SSNA1    | 0.81951  | 0.00897 | 1.66466  | 0.00000 |
| ATXN2L   | 0.14586  | 0.13124 | 0.03489  | 0.70512 |
| GBA      | 0.28741  | 0.38015 | -0.07178 | 0.77777 |
| FBLN2    | 0.26646  | 0.16237 | 0.51182  | 0.00854 |
| NSFL1C   | 0.02888  | 0.90214 | 0.92843  | 0.00018 |
| PDZD2    | 0.10310  | 0.72196 | -0.03404 | 0.89860 |
| CCL21    | 0.13103  | 0.56892 | 0.37451  | 0.09465 |
| GAGE2A   | 0.46540  | 0.10857 | -0.10088 | 0.72860 |
| PGLYRP4  | 0.19227  | 0.49603 | -0.15905 | 0.53391 |
| CLEC5A   | 0.35348  | 0.12388 | 0.19021  | 0.36257 |
| PTK7     | 0.75652  | 0.00066 | -0.18278 | 0.43161 |
| ENG      | -0.01464 | 0.84698 | -0.13829 | 0.16553 |
| TP53INP1 | 0.04155  | 0.78094 | -0.13421 | 0.38689 |
| NEDD9    | 0.30764  | 0.52069 | 0.63976  | 0.09592 |
| VGF      | 0.04225  | 0.75280 | -0.21499 | 0.07866 |
| PTPRM    | -0.06216 | 0.51094 | -0.21652 | 0.09017 |
| TINAGL1  | 0.32187  | 0.00673 | 0.18608  | 0.20012 |
| PSME1    | -0.03735 | 0.84362 | 0.92653  | 0.00003 |
| DUSP13   | -0.88600 | 0.00025 | -0.48034 | 0.02754 |
| MAG      | 0.03869  | 0.66010 | -0.10406 | 0.31409 |
| LARP1    | 0.42095  | 0.10219 | 1.01441  | 0.00003 |
| PFDN4    | 0.46554  | 0.10363 | 0.55363  | 0.02113 |
| CAMSAP1  | 0.11294  | 0.75908 | 1.24288  | 0.00013 |
| NFATC1   | 0.02352  | 0.92153 | -0.28112 | 0.17131 |
| SEC31A   | 0.05830  | 0.77934 | 1.83699  | 0.00000 |
| IL36A    | 0.27282  | 0.49660 | 0.49583  | 0.24424 |
| SMTN     | 0.07536  | 0.84919 | -1.51257 | 0.00041 |
| TSPAN8   | 0.60316  | 0.09524 | 0.57783  | 0.08282 |
| PRAP1    | 0.39187  | 0.00643 | 0.81231  | 0.00001 |
| OPTC     | 0.22460  | 0.14542 | -0.03756 | 0.87052 |
| SIGLEC8  | 0.50518  | 0.01959 | 0.40914  | 0.04201 |
| PLA2G15  | 0.05226  | 0.61110 | -0.00040 | 0.99725 |
| TJAP1    | -0.36267 | 0.19817 | 0.15073  | 0.54985 |
| STX4     | -0.70769 | 0.03422 | -0.67906 | 0.03844 |

|           |          |         |          |         |
|-----------|----------|---------|----------|---------|
| TNFRSF21  | 0.27020  | 0.04063 | -0.02117 | 0.89039 |
| DOK1      | 0.12391  | 0.75575 | 2.29096  | 0.00000 |
| IL10RA    | 0.27889  | 0.17564 | 0.05512  | 0.73109 |
| TSPAN1    | 0.54253  | 0.08093 | -0.03391 | 0.86521 |
| PSIP1     | 0.35135  | 0.33086 | 1.06604  | 0.00234 |
| PIK3AP1   | -0.06838 | 0.80324 | 0.56521  | 0.02505 |
| ANKRD54   | -0.01170 | 0.95330 | 0.59552  | 0.00260 |
| GLO1      | 0.39733  | 0.07772 | -0.95187 | 0.00210 |
| TNFRSF13B | 0.09550  | 0.45078 | -0.17351 | 0.24028 |
| CTSD      | 0.14382  | 0.33164 | 0.18526  | 0.18566 |
| PCDH9     | 0.10046  | 0.33247 | -0.31296 | 0.01727 |
| FUT8      | 0.15604  | 0.47503 | -0.88361 | 0.00005 |
| ESR1      | 0.29783  | 0.40165 | 0.23532  | 0.47711 |
| SCGB1A1   | 0.05109  | 0.75393 | -0.08671 | 0.63416 |
| HLA-A     | 0.19205  | 0.20010 | 0.11039  | 0.44830 |
| ASAH2     | -0.55913 | 0.02460 | -0.80959 | 0.00105 |
| KDR       | -0.05693 | 0.56834 | -0.09620 | 0.47083 |
| LCN2      | 0.33335  | 0.19417 | 0.46366  | 0.06484 |
| THPO      | -0.00508 | 0.97431 | -0.65207 | 0.00029 |
| TYRO3     | -0.05075 | 0.65340 | -0.15544 | 0.20421 |
| CD27      | 0.58463  | 0.00193 | 0.23019  | 0.21574 |
| CASP1     | 0.05476  | 0.92146 | 0.67883  | 0.16445 |
| TEX33     | 0.42153  | 0.50458 | -0.25710 | 0.65621 |
| OTOA      | -0.37671 | 0.15631 | -0.10574 | 0.64907 |
| SLC4A1    | 0.18377  | 0.61932 | 1.06976  | 0.00208 |
| IL34      | 0.01039  | 0.95908 | 0.26617  | 0.11357 |
| RPGR      | 0.01769  | 0.94469 | -0.35447 | 0.16585 |
| IL17RB    | 0.41689  | 0.01362 | 0.40774  | 0.03148 |
| TIMP4     | 0.28835  | 0.06128 | 0.22814  | 0.15374 |
| PALM      | 0.08962  | 0.57565 | 0.31211  | 0.05630 |
| CDSN      | 0.06396  | 0.72886 | -0.35248 | 0.04253 |
| CD2       | 0.09078  | 0.58202 | -0.14545 | 0.37011 |
| THAP12    | -0.55626 | 0.07184 | 0.50165  | 0.14115 |
| CTSH      | 0.01750  | 0.93824 | -0.38089 | 0.11659 |
| DGKA      | -0.07226 | 0.79182 | 0.00932  | 0.96970 |
| ENPP5     | -0.65451 | 0.00001 | -0.47821 | 0.00060 |
| PRKAR1A   | -0.41819 | 0.12274 | 1.22672  | 0.00004 |
| TREM2     | 0.49885  | 0.02286 | 0.35205  | 0.08843 |
| ADGRV1    | 0.00378  | 0.99292 | 0.33418  | 0.44568 |
| VIT       | -0.30606 | 0.06581 | -0.02202 | 0.89316 |
| REG1A     | 0.54905  | 0.03026 | -0.11227 | 0.64777 |
| RTBDN     | 0.26439  | 0.08094 | -0.06692 | 0.64633 |
| SLC1A4    | 0.54632  | 0.24795 | 1.27520  | 0.01493 |
| CDK5RAP3  | 0.32712  | 0.29165 | 1.52601  | 0.00001 |
| VWA5A     | 0.40391  | 0.24779 | 0.68668  | 0.05661 |
| BGN       | -0.08838 | 0.84022 | 0.99592  | 0.02762 |
| IL12RB2   | 0.05254  | 0.64678 | -0.48521 | 0.00047 |
| DNAJB8    | -0.09120 | 0.53551 | -0.38853 | 0.00042 |

|          |          |         |          |         |
|----------|----------|---------|----------|---------|
| XG       | 0.00129  | 0.99412 | -0.03568 | 0.82751 |
| UGDH     | 0.14888  | 0.67697 | 0.01878  | 0.95092 |
| C7orf50  | 0.18467  | 0.41512 | 0.35989  | 0.06787 |
| AK1      | 0.07478  | 0.75499 | 1.25260  | 0.00000 |
| LMOD2    | 0.46935  | 0.18749 | -0.14899 | 0.61661 |
| TRIM24   | 0.07847  | 0.78386 | 0.35815  | 0.19246 |
| GRAP2    | 0.65661  | 0.14512 | 2.91040  | 0.00000 |
| NPTN     | 0.18627  | 0.49902 | -0.76701 | 0.00888 |
| PRND     | 0.03981  | 0.85605 | -0.44570 | 0.03463 |
| KIR2DL3  | 0.41796  | 0.08628 | 0.23170  | 0.37983 |
| CD200    | -0.11176 | 0.25765 | -0.25760 | 0.04939 |
| CCL8     | 0.02843  | 0.89610 | -0.52065 | 0.07989 |
| SLIRP    | 0.77389  | 0.01945 | 0.58200  | 0.08400 |
| GH1      | 1.66162  | 0.00020 | -0.04857 | 0.91124 |
| SCARF2   | 0.52794  | 0.00042 | 0.13188  | 0.39277 |
| GNAS     | -0.35896 | 0.15820 | 0.65881  | 0.00492 |
| ITM2A    | 0.48421  | 0.00306 | 0.48468  | 0.00941 |
| BCAM     | 0.08494  | 0.54031 | 0.08447  | 0.49426 |
| HIP1R    | 0.31720  | 0.35734 | 0.57964  | 0.07143 |
| ENO2     | 0.27485  | 0.30836 | 1.89694  | 0.00000 |
| SERPINA7 | 0.03096  | 0.75198 | -0.04599 | 0.64640 |
| PLSCR3   | -0.47322 | 0.02342 | -0.48515 | 0.02342 |
| CSF3     | -0.11068 | 0.81313 | 0.39256  | 0.38641 |
| DNPEP    | -0.08550 | 0.72490 | 2.25159  | 0.00000 |
| LAT      | 0.40540  | 0.08723 | 1.77312  | 0.00000 |
| PAFAH2   | 0.15428  | 0.61425 | 1.19604  | 0.00004 |
| ITGAL    | -0.40080 | 0.15318 | 0.37529  | 0.13625 |
| BOLA1    | 0.32077  | 0.16566 | 1.24696  | 0.00000 |
| CCT5     | 0.05794  | 0.71084 | 0.86759  | 0.00000 |
| PRKAB1   | -0.24329 | 0.27150 | -0.54623 | 0.01058 |
| SELE     | -0.06054 | 0.75501 | -0.20232 | 0.26280 |
| PLCB1    | 0.07727  | 0.48120 | -0.11088 | 0.21952 |
| INPP5J   | 0.23640  | 0.06592 | 0.53071  | 0.00005 |
| SPP1     | 0.54923  | 0.00582 | 0.82658  | 0.00062 |
| NTF4     | 0.20481  | 0.20613 | 0.11643  | 0.55361 |
| PCNA     | 0.18575  | 0.34967 | -0.34122 | 0.14582 |
| JCHAIN   | 0.27233  | 0.04829 | -0.27782 | 0.05400 |
| COLEC12  | 0.24974  | 0.13369 | -0.01690 | 0.91432 |
| SIRPA    | 0.31581  | 0.01411 | 0.04439  | 0.74764 |
| PACS2    | 0.11987  | 0.62448 | 1.28941  | 0.00000 |
| MAP2     | 0.83617  | 0.00549 | 0.83511  | 0.00115 |
| CDAN1    | 0.15247  | 0.03510 | -0.04097 | 0.64218 |
| CETN3    | -0.10879 | 0.69675 | 0.97845  | 0.00025 |
| B2M      | 0.32821  | 0.04757 | 0.03804  | 0.80689 |
| QSOX1    | 0.12061  | 0.15965 | -0.18905 | 0.04130 |
| IFNLR1   | 0.09496  | 0.42566 | -0.20405 | 0.17824 |
| SLC12A2  | 0.18258  | 0.31146 | 0.35460  | 0.02692 |
| RGL2     | -0.78049 | 0.03496 | 0.15326  | 0.68329 |



|          |          |         |          |         |
|----------|----------|---------|----------|---------|
| ACOT13   | 0.34398  | 0.43910 | 2.98159  | 0.00000 |
| FGD3     | -0.47413 | 0.16188 | 1.04857  | 0.00175 |
| MRI1     | 0.03144  | 0.87257 | 2.04583  | 0.00000 |
| DCTN6    | 0.11409  | 0.61697 | 0.83963  | 0.00028 |
| NTRK2    | -0.36392 | 0.00552 | -0.34488 | 0.00580 |
| TRDMT1   | 0.67911  | 0.02646 | 1.60255  | 0.00000 |
| ADRA2A   | 0.23901  | 0.42381 | 0.04534  | 0.88347 |
| C2orf69  | -0.14896 | 0.55930 | 0.71522  | 0.00325 |
| ASRGL1   | -0.12330 | 0.72537 | 0.97267  | 0.00347 |
| LEO1     | 0.66236  | 0.04241 | 0.72491  | 0.00532 |
| SAMD9L   | -0.27491 | 0.37042 | 0.28877  | 0.35437 |
| DECR1    | 0.87220  | 0.02085 | 1.88197  | 0.00000 |
| WNT9A    | 0.66300  | 0.00004 | 1.19669  | 0.00000 |
| IL24     | 0.37012  | 0.19506 | 0.09305  | 0.74561 |
| KCTD5    | -0.23969 | 0.36417 | 0.69635  | 0.00815 |
| FAM172A  | -0.32529 | 0.19275 | 0.99031  | 0.00007 |
| DCTD     | 0.07784  | 0.80277 | 1.27953  | 0.00004 |
| MEPE     | -0.19365 | 0.09995 | -0.01910 | 0.90652 |
| STAMBP   | 0.14073  | 0.58496 | 1.41897  | 0.00000 |
| MSTN     | -1.18586 | 0.00036 | -0.86253 | 0.00477 |
| CDKN2D   | -0.23503 | 0.43263 | 0.69565  | 0.05209 |
| CD72     | 0.16393  | 0.35402 | 0.52890  | 0.00581 |
| VPS4B    | -0.35513 | 0.31067 | 1.07827  | 0.00244 |
| IPCEF1   | -0.05213 | 0.89684 | 0.92025  | 0.01117 |
| DPT      | -0.28025 | 0.06637 | 0.22112  | 0.21244 |
| ARHGAP5  | 0.46183  | 0.14975 | 0.33896  | 0.23463 |
| LILRB4   | 0.48810  | 0.03058 | 0.79830  | 0.00122 |
| KCNC4    | 0.37452  | 0.10856 | -0.12509 | 0.57469 |
| TNFAIP2  | -0.31282 | 0.20886 | 0.54883  | 0.04884 |
| OLFM4    | 0.73127  | 0.12692 | -1.31002 | 0.00567 |
| BRAP     | 0.10161  | 0.73759 | 1.62692  | 0.00000 |
| SERPINA5 | -0.16704 | 0.40766 | -0.46017 | 0.02272 |
| TCL1B    | -0.00334 | 0.98862 | 0.11489  | 0.65126 |
| DUSP29   | -0.08013 | 0.78180 | 0.25011  | 0.44497 |
| CD3D     | 0.06274  | 0.66490 | 0.02585  | 0.88443 |
| LGMN     | -0.05459 | 0.69739 | -0.26450 | 0.04497 |
| PTPRF    | 0.06212  | 0.53439 | 0.09577  | 0.45468 |
| HSBP1    | 0.16006  | 0.57878 | 1.75211  | 0.00000 |
| PNPT1    | 0.02946  | 0.91936 | -0.06375 | 0.81361 |
| VIPR1    | 0.15463  | 0.14157 | -0.26923 | 0.01915 |
| REEP4    | 0.60077  | 0.02583 | 0.80528  | 0.00142 |
| SAT2     | -0.09886 | 0.77577 | 1.16799  | 0.00018 |
| WFIKKN1  | -0.39803 | 0.02583 | -0.38793 | 0.02371 |
| TARM1    | -0.44496 | 0.29329 | -0.07585 | 0.84525 |
| PDP1     | 0.59844  | 0.08703 | 1.13200  | 0.00049 |
| WASF1    | 0.43003  | 0.10535 | 0.72936  | 0.00099 |
| IGSF3    | -0.09905 | 0.66030 | 0.02504  | 0.91086 |
| IL5RA    | 0.20492  | 0.33882 | -0.17701 | 0.45650 |

|           |          |         |          |         |
|-----------|----------|---------|----------|---------|
| TADA3     | 0.02372  | 0.93014 | 1.45405  | 0.00000 |
| IL17RA    | 0.15723  | 0.17313 | -0.00676 | 0.95320 |
| ILKAP     | 0.20162  | 0.47253 | 0.66583  | 0.01716 |
| FGFR2     | 0.08766  | 0.41090 | 0.04444  | 0.65241 |
| IL33      | 0.78078  | 0.00042 | 0.67007  | 0.00121 |
| MZB1      | 0.62348  | 0.00349 | 0.11581  | 0.60409 |
| IGFBP6    | -0.12743 | 0.44880 | -0.19272 | 0.23591 |
| AMBP      | 0.04780  | 0.59268 | -0.13807 | 0.34922 |
| ITGAM     | -0.19596 | 0.28219 | 0.19240  | 0.22478 |
| TNFRSF12A | 0.07790  | 0.71149 | 0.20909  | 0.32256 |
| STX8      | -0.21972 | 0.39424 | -0.42757 | 0.08797 |
| SOD2      | 0.29724  | 0.25323 | 0.52319  | 0.01493 |
| EDNRB     | 0.14880  | 0.42451 | 0.35604  | 0.07287 |
| MMUT      | 0.12245  | 0.74390 | 1.36052  | 0.00009 |
| SNCG      | 0.40381  | 0.22280 | 0.81393  | 0.02330 |
| SYT1      | 0.22620  | 0.16347 | -0.00135 | 0.99192 |
| B3GAT3    | 0.08427  | 0.62615 | -0.21634 | 0.07642 |
| LAIR2     | -0.11964 | 0.70975 | -0.26941 | 0.33266 |
| L3HYPDH   | 0.15950  | 0.67489 | 1.51968  | 0.00001 |
| TNFRSF10A | 0.21455  | 0.32496 | 0.21611  | 0.31926 |
| CST1      | 0.62528  | 0.13201 | -0.30123 | 0.48593 |
| PDGFRA    | 0.03417  | 0.83207 | 0.06518  | 0.70158 |
| BRK1      | 0.31625  | 0.17198 | 0.44586  | 0.04165 |
| ARHGAP25  | -0.45226 | 0.08459 | -0.26126 | 0.29841 |
| IL13RA2   | 0.08945  | 0.72049 | -0.46570 | 0.06247 |
| MORN4     | 0.11458  | 0.64979 | -0.48594 | 0.04349 |
| UBE2Z     | 0.11165  | 0.61571 | 0.74305  | 0.00128 |
| CALCB     | 0.30241  | 0.16981 | 0.25204  | 0.18764 |
| LPL       | -0.36419 | 0.05047 | -0.34195 | 0.09184 |
| PMVK      | 0.32902  | 0.37962 | 3.34795  | 0.00000 |
| GALNT7    | -0.24874 | 0.07754 | -0.05744 | 0.80903 |
| FAM3B     | 0.03450  | 0.82536 | -0.56360 | 0.00997 |
| LYAR      | 0.30639  | 0.49704 | 0.52788  | 0.19345 |
| PRKD2     | 0.03176  | 0.79982 | 0.27362  | 0.07453 |
| CLEC10A   | -0.08419 | 0.59595 | -0.32687 | 0.04150 |
| NCR1      | 0.30434  | 0.02342 | 0.12999  | 0.36044 |
| CFHR4     | 0.26128  | 0.09701 | -0.02359 | 0.86990 |
| S100A14   | 0.03714  | 0.85087 | -0.65646 | 0.00177 |
| AP2B1     | -0.12905 | 0.64710 | 0.68802  | 0.00431 |
| PIGR      | 0.48679  | 0.00387 | 0.05672  | 0.74634 |
| ERP44     | 0.01660  | 0.86311 | 0.24100  | 0.26380 |
| ACAA1     | 0.49454  | 0.22789 | 1.35622  | 0.00034 |
| CFHR5     | 0.17174  | 0.24847 | 0.11344  | 0.44847 |
| SPESP1    | -0.25268 | 0.12969 | -0.05547 | 0.69295 |
| DDX4      | 0.16598  | 0.62222 | -0.74858 | 0.03433 |
| ATG16L1   | -0.27001 | 0.28189 | 1.01475  | 0.00001 |
| HSPA2     | -0.06043 | 0.75742 | 0.68667  | 0.00019 |
| PTPN6     | 0.10974  | 0.65510 | 2.61751  | 0.00000 |

|          |          |         |          |         |
|----------|----------|---------|----------|---------|
| FBP1     | 0.10061  | 0.80463 | 0.93667  | 0.01316 |
| ADAMTS16 | 0.34847  | 0.01569 | 0.34424  | 0.01914 |
| MARS1    | -0.23772 | 0.38877 | 0.74493  | 0.00561 |
| MPIG6B   | -0.18462 | 0.51988 | -0.96676 | 0.00107 |
| PLPBP    | -0.12629 | 0.63018 | 1.43485  | 0.00000 |
| SERPINA1 | 0.24542  | 0.01620 | 0.01142  | 0.89455 |
| ULBP2    | 0.39764  | 0.07438 | 0.20212  | 0.33545 |
| YARS1    | 0.40317  | 0.31716 | 3.85343  | 0.00000 |
| KIF20B   | 0.91396  | 0.02168 | 0.20361  | 0.55250 |
| ATXN10   | -0.09128 | 0.72296 | 0.73894  | 0.01402 |
| LGALS8   | 0.14645  | 0.59202 | 0.57445  | 0.01054 |
| CA3      | -0.10591 | 0.66093 | 1.63051  | 0.00000 |
| EGLN1    | 0.23137  | 0.60374 | 0.90798  | 0.02482 |
| GALNT5   | 0.44245  | 0.01303 | 0.04468  | 0.78728 |
| SELPLG   | -0.03330 | 0.55863 | 0.09967  | 0.29659 |
| WDR46    | 0.36051  | 0.26746 | 1.12009  | 0.00013 |
| LELP1    | 1.18697  | 0.07686 | 0.22384  | 0.70795 |
| NOMO1    | 0.03221  | 0.72882 | -0.03129 | 0.78596 |
| ELOB     | 0.02499  | 0.91197 | 0.27959  | 0.17398 |
| TYRP1    | -0.15611 | 0.31778 | -0.35972 | 0.03027 |
| DLG4     | -0.32826 | 0.37552 | -0.13981 | 0.66080 |
| PYY      | 1.10990  | 0.00365 | -0.18832 | 0.63697 |
| SERPINB9 | -0.19964 | 0.14103 | 0.24971  | 0.10670 |
| TXNRD1   | -0.01238 | 0.95342 | 0.90281  | 0.00000 |
| PDIA2    | 0.36577  | 0.22647 | 0.30662  | 0.30893 |
| TRIM58   | 0.07533  | 0.81384 | 2.00111  | 0.00000 |
| CD80     | 0.29541  | 0.05279 | 0.17508  | 0.25049 |
| GGT5     | -0.03095 | 0.81384 | -0.05600 | 0.67865 |
| ENOX2    | 0.24149  | 0.14350 | 0.31921  | 0.03520 |
| XCL1     | 0.22936  | 0.19951 | 0.02132  | 0.91889 |
| RRM2     | 0.65741  | 0.07454 | 0.07771  | 0.79188 |
| CPB1     | 0.30203  | 0.25941 | 0.13282  | 0.61951 |
| PSRC1    | 0.23267  | 0.30750 | 0.44224  | 0.03298 |
| TF       | -0.23567 | 0.11444 | -0.36540 | 0.01562 |
| MUC13    | 0.49951  | 0.19698 | 0.27895  | 0.33455 |
| PI16     | -0.27789 | 0.12453 | -0.42441 | 0.00495 |
| CRADD    | -0.23974 | 0.43975 | 0.87082  | 0.00598 |
| MSRA     | -0.29449 | 0.31575 | 0.82331  | 0.00475 |
| BCL2L1   | 0.42224  | 0.18206 | 1.94724  | 0.00000 |
| ERBB4    | -0.03337 | 0.71314 | -0.23888 | 0.03814 |
| S100A16  | 0.04375  | 0.85841 | -0.36104 | 0.14866 |
| NUP50    | -0.02896 | 0.85983 | -0.50361 | 0.01276 |
| CAPN3    | -0.33065 | 0.08810 | -0.24361 | 0.16353 |
| CD302    | 0.45569  | 0.02731 | 0.32936  | 0.19997 |
| CLUL1    | 0.04093  | 0.81648 | -0.48985 | 0.00276 |
| CFD      | -0.11447 | 0.28270 | -0.11578 | 0.22371 |
| LRP1     | -0.13798 | 0.26621 | -0.73409 | 0.00026 |
| TNFRSF14 | 0.30390  | 0.03653 | -0.12992 | 0.42729 |

|                |          |         |          |         |
|----------------|----------|---------|----------|---------|
| ACYP1          | -0.08054 | 0.73469 | 0.90114  | 0.00010 |
| EGFR           | -0.21181 | 0.00956 | -0.29228 | 0.00510 |
| TSHB           | 0.25682  | 0.39785 | -0.22239 | 0.47469 |
| MYO9B          | -0.56095 | 0.05656 | -0.11129 | 0.66272 |
| BCL2           | 0.46364  | 0.02273 | 0.56582  | 0.02201 |
| FOS            | 0.13913  | 0.72160 | -0.29939 | 0.48799 |
| SEMA3G         | 0.04347  | 0.82593 | -0.21561 | 0.23701 |
| AOC1           | -0.16558 | 0.57057 | -0.74939 | 0.00313 |
| MMP3           | 0.02572  | 0.90140 | -0.94806 | 0.00013 |
| TMEM106A       | 0.05244  | 0.84803 | -0.87993 | 0.00026 |
| NAA80          | 0.43113  | 0.33423 | 3.09394  | 0.00000 |
| AGRP           | 0.44382  | 0.02233 | 1.17092  | 0.00001 |
| DNAJC21        | -0.07306 | 0.68459 | 0.77826  | 0.00002 |
| FUT3_FUT5      | 0.49342  | 0.02067 | -0.02013 | 0.92741 |
| TSPAN7         | 0.70659  | 0.02572 | 0.22097  | 0.48345 |
| CD38           | -0.13346 | 0.43221 | -0.16705 | 0.44008 |
| AMY1A_AMY1B_AM | 0.01722  | 0.92390 | -0.23940 | 0.12445 |
| ZNF830         | -0.15442 | 0.53045 | 0.01725  | 0.94042 |
| NFX1           | -0.00014 | 0.99953 | 0.94046  | 0.00004 |
| MMP7           | 0.18250  | 0.44249 | -0.95607 | 0.00023 |
| SDHB           | 0.29760  | 0.44356 | 1.56410  | 0.00002 |
| AMPD3          | -0.03486 | 0.88930 | 1.14311  | 0.00005 |
| COL24A1        | 0.36374  | 0.03594 | -0.30629 | 0.05626 |
| GALNT2         | -0.27341 | 0.00526 | -0.36050 | 0.03869 |
| CLSPN          | 0.17470  | 0.17790 | -0.06301 | 0.72409 |
| BTLA           | 0.40288  | 0.20049 | 0.34699  | 0.30657 |
| DTX2           | -0.63844 | 0.05976 | 0.59885  | 0.09003 |
| ANGPT1         | 0.21330  | 0.39570 | -1.09865 | 0.00001 |
| SFTPA1         | 0.33065  | 0.11421 | -0.01168 | 0.95444 |
| PRKCQ          | 0.06428  | 0.62344 | -0.34294 | 0.01130 |
| ATP1B1         | -0.00511 | 0.98117 | -0.59466 | 0.00885 |
| GRP            | 0.28521  | 0.36407 | 0.58635  | 0.02490 |
| HPGDS          | -0.39220 | 0.03895 | -0.38578 | 0.03884 |
| CD276          | 0.66323  | 0.00085 | 0.15126  | 0.45539 |
| SDC1           | 0.71678  | 0.02063 | 0.55051  | 0.05275 |
| TANK           | 0.06429  | 0.79328 | 0.45628  | 0.05496 |
| CEP170         | -0.29699 | 0.32258 | -0.54571 | 0.05732 |
| ATRN           | -0.05421 | 0.56339 | -0.21411 | 0.02475 |
| PLIN3          | -0.19685 | 0.31712 | 0.41254  | 0.03809 |
| CCAR2          | 0.21552  | 0.47703 | 0.68057  | 0.03347 |
| LTBP3          | 0.32728  | 0.13151 | 0.59144  | 0.00625 |
| CTF1           | 0.09928  | 0.74354 | 0.60921  | 0.02817 |
| AMY2B          | -0.05152 | 0.80546 | -0.36086 | 0.06359 |
| FURIN          | 0.00176  | 0.98914 | -0.13866 | 0.30067 |
| DARS1          | -0.24191 | 0.35058 | 0.85757  | 0.00218 |
| GRN            | 0.17304  | 0.21204 | -0.00946 | 0.94144 |
| RLN2           | 0.19515  | 0.43146 | -1.79818 | 0.00001 |
| GAPDH          | 0.72130  | 0.00731 | 2.48710  | 0.00000 |

|           |          |         |          |         |
|-----------|----------|---------|----------|---------|
| RNF168    | 0.39020  | 0.11434 | 0.13396  | 0.60614 |
| C1GALT1C1 | -0.07894 | 0.59070 | -0.38037 | 0.00772 |
| UFD1      | 0.30228  | 0.47897 | 3.54240  | 0.00000 |
| EHBP1     | 0.15762  | 0.57180 | 1.23999  | 0.00000 |
| ADGRG1    | 0.24389  | 0.36551 | -0.09207 | 0.70009 |
| DNAJA1    | 0.00530  | 0.98041 | -0.07778 | 0.73984 |
| KAZALD1   | -0.56787 | 0.00630 | -0.18551 | 0.36566 |
| MAPK9     | -0.14886 | 0.47322 | 0.67758  | 0.00236 |
| SERPINH1  | 0.86573  | 0.07580 | 3.87690  | 0.00000 |
| CKB       | 1.27927  | 0.00000 | 0.71803  | 0.00349 |
| FCGR2A    | 0.43984  | 0.01584 | 0.11279  | 0.55833 |
| IRAK4     | 0.24683  | 0.44275 | 1.92827  | 0.00000 |
| RGMA      | -0.29438 | 0.02619 | -0.36520 | 0.01565 |
| WFDC12    | 0.18997  | 0.40867 | -0.40535 | 0.06799 |
| LEG1      | -0.23648 | 0.31019 | 0.10239  | 0.68237 |
| CILP      | 0.25314  | 0.22633 | 0.88752  | 0.00015 |
| CHGA      | 0.89493  | 0.00256 | 1.63861  | 0.00000 |
| FKBP14    | 0.04504  | 0.89688 | 1.28081  | 0.00030 |
| CCL5      | 0.18914  | 0.52650 | 0.06987  | 0.78654 |
| PINLYP    | -0.52383 | 0.02626 | -0.85686 | 0.00020 |
| BST2      | 0.63285  | 0.09359 | 0.64456  | 0.06352 |
| EPPK1     | 0.55621  | 0.06318 | 0.34719  | 0.23757 |
| TLR3      | -0.05626 | 0.76749 | -0.00646 | 0.97471 |
| CCDC134   | 0.21260  | 0.50530 | 0.80746  | 0.00713 |
| OFD1      | -0.47076 | 0.22000 | 0.52879  | 0.21556 |
| TBCC      | -0.13814 | 0.67656 | 1.65395  | 0.00000 |
| THSD1     | -0.17526 | 0.26471 | -0.21323 | 0.19403 |
| FGF21     | 0.42033  | 0.37371 | 1.51158  | 0.00176 |
| NPTX2     | 0.01633  | 0.92395 | 0.28277  | 0.13283 |
| FTCD      | -0.01611 | 0.96701 | 0.87585  | 0.01616 |
| HDGF      | 0.28626  | 0.33861 | 1.63110  | 0.00001 |
| ATF2      | 0.26232  | 0.21461 | -0.47796 | 0.10897 |
| TP53BP1   | 0.38178  | 0.15325 | 0.90167  | 0.00250 |
| PRTG      | -0.11929 | 0.29152 | -0.25769 | 0.15117 |
| NT5C      | 0.22588  | 0.44986 | 1.33756  | 0.00000 |
| COL4A1    | 0.17017  | 0.43240 | -0.08248 | 0.70873 |
| MXRA8     | -0.10635 | 0.40927 | -0.38889 | 0.00190 |
| PPP1R9B   | 0.13876  | 0.61660 | 1.37526  | 0.00011 |
| FDX1      | 0.57231  | 0.08622 | 1.06546  | 0.00077 |
| LTBR      | 0.17912  | 0.27202 | 0.12621  | 0.47770 |
| WWP2      | -0.50109 | 0.04193 | 0.65895  | 0.00828 |
| CES3      | -0.28355 | 0.17647 | -1.25756 | 0.00000 |
| CEACAM21  | 0.01929  | 0.94860 | 0.23809  | 0.38897 |
| TGFB1     | 0.45571  | 0.00344 | -0.27615 | 0.12207 |
| VSTM1     | 0.28947  | 0.25105 | 0.17594  | 0.47281 |
| FGR       | -0.21242 | 0.62713 | 0.92162  | 0.03910 |
| OSM       | 0.72122  | 0.06475 | 0.09127  | 0.80920 |
| CXCL10    | 0.17577  | 0.50405 | 0.02923  | 0.91595 |

|                |          |         |          |         |
|----------------|----------|---------|----------|---------|
| PSCA           | 0.08211  | 0.89195 | -0.25082 | 0.67613 |
| BPIFA2         | -0.94263 | 0.02133 | -0.86191 | 0.01855 |
| HAGH           | 0.21379  | 0.46509 | 3.82671  | 0.00000 |
| CD164L2        | -0.11827 | 0.52329 | -0.17502 | 0.30732 |
| YWHAQ          | 0.01136  | 0.96691 | 1.14896  | 0.00000 |
| MCFD2          | 0.14330  | 0.33647 | 0.21229  | 0.19226 |
| RARRES1        | 0.18024  | 0.23461 | -0.12878 | 0.38466 |
| PPL            | 0.50472  | 0.08147 | 0.97113  | 0.00007 |
| SV2A           | 0.23848  | 0.44992 | 0.05776  | 0.84368 |
| FOLR1          | 0.39642  | 0.00594 | 0.03243  | 0.81812 |
| TUBB3          | 0.95921  | 0.00065 | 0.77984  | 0.00008 |
| FOXO3          | 0.55585  | 0.09424 | 1.85420  | 0.00000 |
| QDPR           | 0.03471  | 0.85843 | 1.26736  | 0.00000 |
| CKMT1B; CKMT1A | 0.40642  | 0.10693 | 1.06637  | 0.00003 |
| ADAMTS1        | 0.26228  | 0.23918 | 0.69200  | 0.00316 |
| AKR7L          | 0.11316  | 0.69610 | 0.71685  | 0.00962 |
| LYVE1          | 0.08872  | 0.56049 | -0.08423 | 0.52364 |
| CRLF1          | -0.07447 | 0.52676 | 0.08541  | 0.51075 |
| RAB37          | 0.04043  | 0.88833 | 0.47829  | 0.10956 |
| LILRB1         | 0.07306  | 0.51814 | -0.06548 | 0.59491 |
| GYS1           | 0.35642  | 0.31596 | 1.73461  | 0.00001 |
| GPC1           | -0.23266 | 0.06060 | -0.23651 | 0.25047 |
| KIFBP          | 0.05542  | 0.83802 | 1.84330  | 0.00000 |
| RUVBL1         | -0.36104 | 0.30724 | -0.40610 | 0.23554 |
| DKK4           | 0.19186  | 0.45375 | -0.09913 | 0.67123 |
| PLIN1          | -0.02473 | 0.93509 | 0.35116  | 0.30426 |
| VIM            | -0.11607 | 0.66807 | -0.24489 | 0.42076 |
| SIL1           | -0.07189 | 0.56283 | -0.30626 | 0.01234 |
| CDH22          | 0.11507  | 0.63159 | -0.11582 | 0.63940 |
| DLL1           | 0.31886  | 0.02980 | 0.27937  | 0.08193 |
| SEPTIN9        | -0.21306 | 0.37804 | 0.44397  | 0.06801 |
| IGSF9          | -0.10201 | 0.73545 | 0.58622  | 0.04998 |
| RFC4           | -0.11134 | 0.53806 | 0.32208  | 0.05720 |
| ACRBP          | 0.14508  | 0.32355 | 0.49489  | 0.00052 |
| GIMAP8         | 0.14935  | 0.58142 | 0.42754  | 0.09157 |
| MRPL46         | 0.02397  | 0.87284 | 0.27299  | 0.01236 |
| CD22           | -0.16317 | 0.26042 | -0.36903 | 0.07711 |
| CEACAM8        | 0.20794  | 0.41263 | -0.18332 | 0.51379 |
| CCDC28A        | -0.06114 | 0.65943 | 0.02679  | 0.84370 |
| RANBP2         | -0.07779 | 0.65528 | -0.07419 | 0.70285 |
| IGF1R          | 0.08646  | 0.45503 | -0.07869 | 0.62685 |
| LIF            | 0.55115  | 0.20198 | 0.53984  | 0.20101 |
| MAX            | 0.19992  | 0.60190 | 1.88318  | 0.00000 |
| BATF           | 0.09740  | 0.74026 | -0.02862 | 0.92971 |
| CA9            | 0.39873  | 0.16623 | -0.06937 | 0.80184 |
| IL11           | -0.46440 | 0.03319 | -0.04980 | 0.83758 |
| KIAA2013       | 0.10134  | 0.60624 | -0.50376 | 0.00381 |
| CNPY2          | -0.02609 | 0.89531 | 0.45516  | 0.02187 |

|                  |          |         |          |         |
|------------------|----------|---------|----------|---------|
| LHPP             | 0.18640  | 0.44772 | 1.52748  | 0.00000 |
| COMT             | -0.18232 | 0.51085 | 1.39286  | 0.00001 |
| SLC9A3R1         | -0.22128 | 0.47321 | 1.12498  | 0.00016 |
| LTA              | -0.10878 | 0.11995 | -0.23146 | 0.00525 |
| ADGRE1           | 0.07324  | 0.76164 | -0.01602 | 0.93855 |
| TMPRSS15         | -0.24684 | 0.49700 | -0.80945 | 0.01787 |
| DCUN1D1          | 0.14954  | 0.58507 | -0.31120 | 0.24606 |
| ERC2             | 0.26180  | 0.31767 | 0.95373  | 0.00132 |
| CD70             | 0.23495  | 0.13308 | -0.64332 | 0.00141 |
| LECT2            | 0.39880  | 0.15353 | 0.71757  | 0.01421 |
| APOE             | 0.38558  | 0.03505 | 0.27059  | 0.08924 |
| HYOU1            | 0.16614  | 0.03699 | 0.05194  | 0.60565 |
| SH2B3            | 0.20923  | 0.55797 | 1.65884  | 0.00001 |
| ALDH1A1          | 0.11116  | 0.67969 | 1.37497  | 0.00000 |
| LILRA5           | 0.23408  | 0.08100 | -0.03363 | 0.80235 |
| ELN              | 0.78317  | 0.00002 | 0.05600  | 0.77824 |
| ENPP7            | 0.32583  | 0.30608 | 0.47102  | 0.12330 |
| CGB3; CGB5; CGB8 | 0.44072  | 0.19743 | 0.43927  | 0.03120 |
| MSR1             | 0.37389  | 0.02565 | 0.33128  | 0.07315 |
| KLRD1            | 0.44496  | 0.00483 | 0.23391  | 0.34495 |
| PDIA4            | 0.33263  | 0.25512 | 1.21582  | 0.00001 |
| CNGB3            | -0.19201 | 0.24285 | -0.04729 | 0.73015 |
| RGCC             | 0.29853  | 0.19765 | 1.62307  | 0.00000 |
| SSC4D            | -1.75934 | 0.00007 | -0.65611 | 0.09733 |
| HRG              | -0.17657 | 0.20922 | -0.09634 | 0.41940 |
| PPP1R14D         | 0.70038  | 0.00438 | 0.25219  | 0.26043 |
| CNTN2            | -0.13982 | 0.43105 | -0.44716 | 0.03073 |
| SERPIND1         | 0.05687  | 0.68197 | -0.17284 | 0.17374 |
| FABP4            | 0.19336  | 0.56382 | 1.18362  | 0.00057 |
| NXPH1            | -0.05669 | 0.41861 | -0.04138 | 0.45293 |
| MMP12            | 0.89511  | 0.00281 | -0.05739 | 0.85668 |
| PLAUR            | 0.44015  | 0.01889 | 0.16965  | 0.35919 |
| LY9              | 0.09238  | 0.40208 | -0.29292 | 0.11804 |
| PCSK9            | -0.05720 | 0.72470 | -0.32235 | 0.05178 |
| HYAL1            | -0.03989 | 0.67636 | -0.22496 | 0.04251 |
| CD300A           | 0.24292  | 0.08377 | 0.16614  | 0.23181 |
| XPNPEP2          | 0.03653  | 0.90088 | -0.23002 | 0.40482 |
| CRELD1           | -0.07913 | 0.52191 | 0.03459  | 0.78802 |
| APOB             | 0.17504  | 0.27316 | -0.84171 | 0.00000 |
| KLK8             | -0.23886 | 0.23559 | -0.55579 | 0.00124 |
| YY1              | 0.02122  | 0.93859 | -0.06390 | 0.82188 |
| BEX3             | 0.41848  | 0.02763 | -0.18354 | 0.33756 |
| CC2D1A           | -0.59494 | 0.09403 | -0.04921 | 0.88024 |
| GRK5             | -0.02945 | 0.88470 | 0.12171  | 0.54747 |
| F11              | -0.15684 | 0.15729 | -0.02979 | 0.77139 |
| RAB6A            | -0.45043 | 0.12448 | -1.44431 | 0.00004 |
| SCGB3A2          | 0.05710  | 0.79191 | -0.49133 | 0.07386 |
| IGFL4            | 0.03935  | 0.88559 | 0.32829  | 0.19541 |

|         |          |         |          |         |
|---------|----------|---------|----------|---------|
| SEMA6C  | -0.08747 | 0.36834 | -0.31828 | 0.00212 |
| IGF2BP3 | -0.60079 | 0.03905 | -0.17851 | 0.50729 |
| PRDX6   | -0.36014 | 0.09873 | 1.16255  | 0.00001 |
| ENSA    | 0.28213  | 0.16110 | 1.21697  | 0.00000 |
| MED18   | -0.30826 | 0.24182 | 1.38647  | 0.00000 |
| CPA1    | 0.02887  | 0.92479 | -0.23469 | 0.37220 |
| OCLN    | 0.65327  | 0.04439 | 0.71009  | 0.01089 |
| GOT1    | 0.02583  | 0.93120 | 0.71592  | 0.00319 |
| MTIF3   | 0.18640  | 0.63824 | 1.97078  | 0.00000 |
| CLEC3B  | -0.46436 | 0.00010 | -0.39685 | 0.00030 |
| IFIT3   | 0.06002  | 0.87775 | 0.56617  | 0.15938 |
| DXO     | -0.04602 | 0.85386 | 1.32664  | 0.00000 |
| DTYMK   | -0.07894 | 0.77818 | 1.62266  | 0.00000 |
| TGFBR2  | 0.18889  | 0.17931 | 0.05907  | 0.68149 |
| LSP1    | 0.24163  | 0.29689 | 0.01684  | 0.93863 |
| DCTN1   | 0.08084  | 0.71749 | 0.44976  | 0.04868 |
| APOA1   | -0.15077 | 0.32114 | -0.75207 | 0.00000 |
| ANGPTL4 | 0.24895  | 0.13511 | 0.77257  | 0.00010 |
| HEG1    | -0.06268 | 0.62296 | -0.05173 | 0.65785 |
| GFRA3   | -0.19061 | 0.26409 | -0.38869 | 0.02818 |
| TST     | -0.02028 | 0.93334 | 0.87447  | 0.00021 |
| MFGE8   | 0.15410  | 0.40695 | -0.21185 | 0.27667 |
| NAGA    | -0.24100 | 0.18384 | -0.78399 | 0.00001 |
| ENPEP   | -0.19700 | 0.46972 | 0.04557  | 0.85694 |
| BCHE    | -0.49863 | 0.00438 | -0.37787 | 0.01857 |
| EZR     | 0.16627  | 0.33650 | 0.58099  | 0.00006 |
| GLRX5   | 0.26049  | 0.49274 | 1.55484  | 0.00001 |
| ITPR1   | 0.60586  | 0.02832 | 0.40657  | 0.04811 |
| DDC     | -0.04638 | 0.87508 | -0.33033 | 0.21440 |
| CRYBB1  | 0.07535  | 0.74455 | 0.72993  | 0.00090 |
| CA14    | -0.33161 | 0.08917 | -0.48689 | 0.02330 |
| VNN1    | -0.29134 | 0.18052 | 0.08353  | 0.64644 |
| TAFA5   | 0.06385  | 0.72886 | -0.02342 | 0.89837 |
| TDO2    | 0.20213  | 0.65660 | 0.92691  | 0.02320 |
| SAG     | 0.42505  | 0.21541 | 0.19310  | 0.61543 |
| SPRING1 | 0.09027  | 0.58373 | -0.12163 | 0.44565 |
| CGREF1  | 0.09639  | 0.61294 | -0.05833 | 0.75956 |
| CTSE    | -0.05138 | 0.81030 | -0.03317 | 0.86069 |
| TRAF3   | -0.40100 | 0.01268 | 0.14228  | 0.41363 |
| BPIFB1  | -0.02670 | 0.93866 | -0.09370 | 0.75572 |
| IL19    | 0.61362  | 0.03171 | 0.16594  | 0.51182 |
| SNU13   | -0.26196 | 0.53445 | 0.30855  | 0.42550 |
| DENND2B | 0.16650  | 0.34472 | 0.01723  | 0.93107 |
| ANXA2   | 0.62596  | 0.11911 | 1.30996  | 0.00023 |
| CD6     | 0.06069  | 0.76129 | -0.08301 | 0.74386 |
| F2R     | 0.59087  | 0.00529 | 2.61994  | 0.00000 |
| BPIFB2  | -0.23653 | 0.42557 | 0.00428  | 0.98691 |
| PALM2   | 0.64463  | 0.03208 | 0.92418  | 0.00193 |



|          |          |         |          |         |
|----------|----------|---------|----------|---------|
| BTNL10   | 0.18273  | 0.18016 | -0.02865 | 0.87757 |
| MVK      | -0.12572 | 0.73544 | 1.38305  | 0.00008 |
| C2CD2L   | -0.61170 | 0.11609 | -1.38026 | 0.00001 |
| RAD51    | 0.36212  | 0.27134 | 0.53839  | 0.11611 |
| PTGR1    | -0.54824 | 0.11784 | 1.05148  | 0.00040 |
| C1QTNF6  | 0.24956  | 0.32240 | 1.20397  | 0.00000 |
| SNX15    | -0.02096 | 0.92644 | 0.94277  | 0.00000 |
| NUB1     | -0.24959 | 0.43767 | 1.04355  | 0.00098 |
| GUCY2C   | 0.53981  | 0.20537 | -0.20458 | 0.65108 |
| GOLM2    | 0.00536  | 0.96525 | 0.00871  | 0.95128 |
| GID8     | 0.06831  | 0.65605 | 0.34074  | 0.04449 |
| SRP14    | 0.33205  | 0.26439 | 0.27699  | 0.34225 |
| GSN      | -0.37421 | 0.00082 | -0.36072 | 0.00019 |
| MMP10    | -0.06861 | 0.72717 | -0.57003 | 0.01383 |
| UNG      | 0.35919  | 0.19718 | 0.67651  | 0.00389 |
| PDIA3    | 0.30049  | 0.24155 | -0.55617 | 0.00515 |
| CLEC4M   | 0.02505  | 0.84316 | -0.28816 | 0.01347 |
| PLXNB2   | 0.06501  | 0.49183 | -0.02687 | 0.81596 |
| CALCOCO2 | -0.25388 | 0.39569 | 0.36256  | 0.17854 |
| STC2     | -0.13919 | 0.33013 | 0.02716  | 0.86097 |
| SMC3     | -0.38056 | 0.06673 | -0.13411 | 0.42419 |
| LRP2     | 0.02120  | 0.89956 | -0.20617 | 0.33966 |
| ST8SIA1  | -0.03678 | 0.79078 | -0.65925 | 0.00022 |
| IFNL2    | 0.36951  | 0.14686 | 0.22602  | 0.38388 |
| CST7     | 0.20153  | 0.52432 | -0.06122 | 0.84804 |
| PCSK7    | 0.00096  | 0.99381 | 0.01710  | 0.89586 |
| NDUFA5   | 0.45747  | 0.03679 | 0.85982  | 0.00002 |
| GCHFR    | 0.12078  | 0.69403 | 1.07294  | 0.00007 |
| LYSMD3   | 0.37370  | 0.21527 | 0.52290  | 0.06397 |
| PSMG3    | 0.12303  | 0.53831 | 1.63074  | 0.00000 |
| HDAC9    | -0.17644 | 0.69812 | 0.59185  | 0.24004 |
| ADGRF5   | 0.17375  | 0.02294 | -0.07996 | 0.31257 |
| REN      | 0.05604  | 0.82822 | -0.18812 | 0.40126 |
| TPR      | 0.14702  | 0.69698 | 0.65391  | 0.10342 |
| GRIK2    | -0.09139 | 0.54357 | -0.40227 | 0.02354 |
| PEBP1    | -0.03254 | 0.88164 | 1.46109  | 0.00000 |
| AP3B1    | -0.05857 | 0.85132 | 0.92224  | 0.00265 |
| CLU      | 0.11120  | 0.22531 | -0.08453 | 0.36964 |
| CD40     | 0.35811  | 0.07464 | 0.25755  | 0.18543 |
| TNN      | -0.05065 | 0.64853 | -0.08600 | 0.42910 |
| STX5     | 0.14478  | 0.71474 | 0.96463  | 0.00399 |
| CA4      | -0.15214 | 0.19640 | -0.23451 | 0.03168 |
| CERT1    | -0.26085 | 0.28067 | 0.46881  | 0.09701 |
| MMP1     | 1.20646  | 0.00000 | -0.62083 | 0.05396 |
| CREB3    | 0.38507  | 0.07211 | -0.17018 | 0.47541 |
| CASC3    | 0.10153  | 0.74996 | 1.36760  | 0.00001 |
| PLA2G1B  | 0.05875  | 0.82395 | -0.30747 | 0.15838 |
| AMOTL2   | -0.06429 | 0.47910 | 0.26847  | 0.02761 |

|          |          |         |          |         |
|----------|----------|---------|----------|---------|
| F9       | 0.00438  | 0.95593 | 0.38099  | 0.16752 |
| MAVS     | -0.07917 | 0.80344 | -0.18463 | 0.56037 |
| IL17F    | 0.44029  | 0.11718 | -0.29974 | 0.26347 |
| CD2AP    | 0.57143  | 0.01361 | 1.55191  | 0.00000 |
| PEAR1    | -0.20188 | 0.05155 | -0.19806 | 0.05275 |
| STAT5B   | 0.15853  | 0.72073 | 2.81115  | 0.00000 |
| PKN3     | -0.23917 | 0.36337 | 0.63573  | 0.06424 |
| IGFBP4   | 0.56739  | 0.03811 | 0.21286  | 0.38987 |
| FAM20A   | 0.05894  | 0.72286 | 0.21735  | 0.15548 |
| SRPX     | 0.18450  | 0.40602 | 0.37639  | 0.06625 |
| CPXM2    | 0.03283  | 0.82755 | 0.09014  | 0.56665 |
| AGT      | 0.00273  | 0.94896 | -0.02627 | 0.51237 |
| NOS1     | 0.03871  | 0.89823 | 0.54905  | 0.10549 |
| PRRT3    | 0.15301  | 0.33596 | 0.38360  | 0.01627 |
| MEP1A    | -0.21994 | 0.49075 | 0.34378  | 0.15233 |
| LILRA3   | 0.00271  | 0.99015 | -0.01484 | 0.95660 |
| COX5B    | 0.30433  | 0.40550 | 1.52677  | 0.00010 |
| OPLAH    | 0.25524  | 0.23606 | 0.62996  | 0.00363 |
| PRUNE2   | 0.38988  | 0.06159 | 0.22462  | 0.32304 |
| ERBB3    | 0.11289  | 0.23413 | -0.04922 | 0.62044 |
| TNNI3    | 0.02987  | 0.95754 | -0.79223 | 0.14630 |
| MINK1    | 0.22612  | 0.49854 | 3.60180  | 0.00000 |
| PRSS8    | 0.50869  | 0.00681 | 0.18603  | 0.28624 |
| CDH3     | 0.36614  | 0.05382 | -0.18581 | 0.31113 |
| ADD1     | 0.13714  | 0.51151 | 1.29030  | 0.00000 |
| TRPV3    | 0.04897  | 0.87191 | -0.09241 | 0.72627 |
| PNMA2    | 0.22189  | 0.50319 | 0.46848  | 0.15921 |
| GBP4     | -0.27999 | 0.09489 | -0.52060 | 0.00056 |
| PNLIP    | -0.07423 | 0.81580 | -0.24203 | 0.38981 |
| APOBR    | 0.07304  | 0.49648 | 0.05095  | 0.63045 |
| MYO6     | 0.39989  | 0.03051 | 0.45272  | 0.02009 |
| SCG3     | -0.01211 | 0.92665 | -0.19122 | 0.17084 |
| LGALS4   | 0.88753  | 0.00176 | 0.72738  | 0.00286 |
| BAG3     | -0.24859 | 0.20551 | 0.40833  | 0.11105 |
| RARRES2  | 0.29927  | 0.10635 | -0.09596 | 0.58676 |
| BTN2A1   | 0.16914  | 0.27352 | -0.01891 | 0.87895 |
| PAMR1    | 0.07937  | 0.51478 | -0.12529 | 0.34778 |
| NOS2     | 0.58838  | 0.03300 | 0.13422  | 0.59740 |
| DAG1     | 0.10172  | 0.56136 | -0.31801 | 0.07592 |
| ACVRL1   | 0.14769  | 0.40899 | 0.01902  | 0.91732 |
| PIIF     | 0.03663  | 0.94944 | 1.21447  | 0.01868 |
| CD300E   | 0.30555  | 0.16879 | 0.11676  | 0.63169 |
| DDI2     | 0.21910  | 0.43244 | 1.83282  | 0.00000 |
| PRR4     | -0.13534 | 0.61638 | 0.82635  | 0.00122 |
| SERPINB6 | -0.05672 | 0.80146 | 0.73628  | 0.00100 |
| TMSB10   | 0.27474  | 0.39080 | 1.55455  | 0.00003 |
| B4GAT1   | -0.09243 | 0.35389 | -0.15764 | 0.21616 |
| DCDC2C   | 0.28714  | 0.29943 | -0.16376 | 0.61861 |

|          |          |         |          |         |
|----------|----------|---------|----------|---------|
| SCGB2A2  | 0.26397  | 0.20848 | -0.05087 | 0.81518 |
| RTN4IP1  | 0.32322  | 0.39692 | 2.29398  | 0.00000 |
| RIPK4    | -0.07339 | 0.77527 | -0.09884 | 0.68018 |
| SCPEP1   | 0.41161  | 0.07293 | -0.10017 | 0.61293 |
| APOH     | -0.19511 | 0.07218 | -0.03983 | 0.70702 |
| CFHR2    | 0.16283  | 0.33897 | 0.22438  | 0.16525 |
| IGLC2    | 0.41675  | 0.00444 | -0.01230 | 0.91347 |
| RANBP1   | 0.04507  | 0.80190 | 1.76617  | 0.00000 |
| KLK1     | -0.49353 | 0.10828 | 0.27599  | 0.37978 |
| AIF1     | -0.13816 | 0.62763 | 0.70119  | 0.03076 |
| C1QTNF9  | -0.14646 | 0.37994 | -0.66977 | 0.00000 |
| ENO3     | -0.97935 | 0.00136 | 0.82539  | 0.00528 |
| ZBP1     | 0.42502  | 0.31945 | 0.45590  | 0.20104 |
| DBN1     | 0.25494  | 0.13173 | 0.52786  | 0.00118 |
| KLF4     | 0.52711  | 0.11074 | 0.52830  | 0.06006 |
| HEPH     | 0.10199  | 0.44161 | -0.16973 | 0.12828 |
| TIGAR    | 0.02623  | 0.92554 | 0.61321  | 0.02167 |
| DDX39A   | -0.11272 | 0.56055 | 0.13862  | 0.46278 |
| FGFBP1   | -0.00632 | 0.97885 | -0.13351 | 0.56648 |
| SLAMF7   | -0.00217 | 0.99119 | -0.21508 | 0.28373 |
| ECHDC3   | 0.61727  | 0.17935 | 1.33257  | 0.00054 |
| SOD3     | 0.11483  | 0.54379 | -0.37778 | 0.01351 |
| FGF12    | -0.00442 | 0.98420 | -0.32180 | 0.08572 |
| CYTL1    | -0.15801 | 0.38030 | -0.22958 | 0.14132 |
| CUZD1    | 0.34233  | 0.37173 | 0.11661  | 0.71780 |
| PM20D1   | -0.36994 | 0.48968 | -0.62991 | 0.20092 |
| ADM      | 0.34380  | 0.11901 | 2.87954  | 0.00000 |
| EIF4G1   | 0.12537  | 0.64905 | 1.30760  | 0.00013 |
| MME      | -0.35369 | 0.18190 | -0.21161 | 0.47463 |
| ARHGEF5  | 0.14265  | 0.69051 | 0.75086  | 0.04148 |
| NBL1     | 0.24929  | 0.06849 | -0.08209 | 0.53693 |
| FUCA1    | -0.38229 | 0.13233 | -0.11707 | 0.61100 |
| NCLN     | 0.18485  | 0.16920 | 0.00554  | 0.97214 |
| INPPL1   | 0.25337  | 0.45421 | 1.46112  | 0.00001 |
| IL20     | 0.00025  | 0.99861 | -0.02549 | 0.80295 |
| LCAT     | -0.27437 | 0.00876 | -0.13863 | 0.20402 |
| PPP1R12A | -0.05951 | 0.86726 | 1.39246  | 0.00018 |
| ANXA1    | -0.03525 | 0.91542 | 0.90224  | 0.00630 |
| BRD3     | -0.14866 | 0.65835 | 0.67713  | 0.04031 |
| COL5A1   | 0.14511  | 0.47672 | -0.23119 | 0.22619 |
| CTSV     | -0.45694 | 0.02148 | -0.63716 | 0.00213 |
| PALM3    | 0.33037  | 0.36914 | 0.44225  | 0.18785 |
| TRIM40   | 0.17126  | 0.65988 | 0.81343  | 0.05937 |
| PTRHD1   | 0.08109  | 0.74205 | 1.23244  | 0.00000 |
| AK2      | 0.16953  | 0.61665 | 2.30392  | 0.00000 |
| CEACAM3  | -0.11661 | 0.61701 | -0.01144 | 0.95089 |
| AMDHD2   | 0.06189  | 0.58772 | 0.24921  | 0.01722 |
| TRIM25   | -0.93398 | 0.00346 | 0.06183  | 0.84341 |

|           |          |         |          |         |
|-----------|----------|---------|----------|---------|
| FCAR      | 0.41726  | 0.06414 | 0.13667  | 0.54846 |
| BIRC2     | -0.21161 | 0.14699 | -0.04097 | 0.71857 |
| TMPRSS11B | 0.25171  | 0.42882 | -0.22193 | 0.49992 |
| TGFBR3    | 0.07389  | 0.59680 | -0.07098 | 0.71051 |
| MYH7B     | 0.10584  | 0.60892 | -0.19351 | 0.44247 |
| GAST      | 1.13953  | 0.01067 | 2.38175  | 0.00000 |
| ID4       | 0.11517  | 0.61660 | 0.41015  | 0.06113 |
| TALDO1    | -0.08204 | 0.72689 | 1.22532  | 0.00000 |
| LTO1      | 0.24925  | 0.14291 | 0.06843  | 0.66190 |
| PPP1CC    | -0.18357 | 0.52795 | 1.21508  | 0.00003 |
| SPRY2     | 0.29200  | 0.44911 | 1.99143  | 0.00000 |
| MYDGF     | 0.16208  | 0.64253 | 0.52085  | 0.10236 |
| RABGAP1L  | 0.24879  | 0.28168 | 1.55256  | 0.00000 |
| RALB      | -0.46923 | 0.07532 | -0.95918 | 0.00130 |
| ABRAXAS2  | 0.34671  | 0.19614 | 0.97509  | 0.00035 |
| FHIT      | -0.16368 | 0.55994 | 1.31812  | 0.00001 |
| TEF       | 0.61897  | 0.04635 | 0.67234  | 0.01064 |
| EPHA4     | -0.14878 | 0.23224 | -0.29818 | 0.02439 |
| SNAPIN    | -0.00405 | 0.98406 | 0.70931  | 0.00181 |
| SLIT2     | 0.41182  | 0.07905 | 0.24466  | 0.28805 |
| NID2      | 0.46850  | 0.03255 | -0.23389 | 0.25592 |
| XIAP      | -0.25732 | 0.27484 | 0.92857  | 0.00009 |
| ADH4      | -0.29038 | 0.39521 | 0.87288  | 0.00644 |
| TOM1L2    | 0.29829  | 0.38935 | 3.27407  | 0.00000 |
| ECE1      | -0.16205 | 0.12208 | -0.11263 | 0.26069 |
| NT5C3A    | -0.36228 | 0.21130 | 1.12076  | 0.00084 |
| ACTN4     | -0.14904 | 0.43639 | -0.19544 | 0.30760 |
| TOP1MT    | 0.11886  | 0.57922 | -0.24556 | 0.28520 |
| KLK12     | 0.32225  | 0.47408 | 0.19489  | 0.65717 |
| TCP11     | 0.22379  | 0.67069 | 0.43811  | 0.39831 |
| CHAC2     | 0.18283  | 0.35549 | 0.67877  | 0.00254 |
| VEGFC     | 0.15586  | 0.33989 | -0.69032 | 0.00002 |
| ST3GAL1   | 0.02723  | 0.82113 | -0.28926 | 0.08187 |
| CR2       | -0.60572 | 0.00036 | -0.65356 | 0.00138 |
| ACE       | -0.01537 | 0.88169 | -0.09052 | 0.31724 |
| LACRT     | -0.05333 | 0.80374 | -0.33515 | 0.18424 |
| ANGPT2    | 0.17776  | 0.30193 | -0.12933 | 0.58619 |
| ASGR1     | 0.15726  | 0.35535 | 0.14536  | 0.40535 |
| SH2D1A    | -0.06356 | 0.81399 | 0.58740  | 0.02770 |
| FUS       | 0.21599  | 0.39148 | 0.85905  | 0.00014 |
| DYNC1H1   | -0.02261 | 0.90898 | 0.13915  | 0.52513 |
| FXN       | 0.07769  | 0.77132 | 1.44706  | 0.00000 |
| CHM       | -0.11906 | 0.64736 | 0.88912  | 0.00035 |
| VWF       | 0.43488  | 0.04803 | 0.12619  | 0.60887 |
| SDC4      | 0.04657  | 0.82061 | -0.78864 | 0.00010 |
| LRCH4     | 0.51761  | 0.20211 | 0.48684  | 0.15157 |
| AHSG      | -0.14281 | 0.34524 | -0.08840 | 0.50283 |
| SWAP70    | 0.01271  | 0.95655 | 0.35580  | 0.07878 |

|          |          |         |          |         |
|----------|----------|---------|----------|---------|
| MATN2    | -0.08312 | 0.42531 | -0.02933 | 0.80766 |
| TTN      | -0.01435 | 0.96340 | 0.17451  | 0.50143 |
| GGA1     | -0.16406 | 0.44207 | -0.04277 | 0.84075 |
| FGF16    | -0.27342 | 0.38025 | -0.14627 | 0.62348 |
| IDUA     | 0.01550  | 0.92362 | 0.59261  | 0.00170 |
| GNPDA1   | -0.28130 | 0.07265 | 0.55038  | 0.00044 |
| GTPBP2   | -0.44702 | 0.25957 | -0.35679 | 0.33071 |
| CEACAM18 | -0.18271 | 0.65798 | 0.28646  | 0.47167 |
| IRAG2    | -0.50564 | 0.18364 | -0.17456 | 0.64918 |
| IKZF2    | 0.03853  | 0.89574 | 0.19628  | 0.54032 |
| TSC1     | 0.02641  | 0.92404 | -0.07807 | 0.77557 |
| ACY3     | 0.23301  | 0.40547 | 0.19542  | 0.42139 |
| CD109    | -0.15043 | 0.26129 | -0.34036 | 0.01806 |
| CASP7    | 0.48094  | 0.07956 | 1.55050  | 0.00000 |
| NRP2     | 0.09929  | 0.43490 | 0.01858  | 0.89033 |
| MCEE     | 0.09802  | 0.78394 | 1.23656  | 0.00012 |
| GUSB     | -0.36029 | 0.03665 | -0.38199 | 0.04604 |
| AZI2     | -0.11002 | 0.69189 | 0.24297  | 0.38673 |
| SMPDL3B  | -0.28343 | 0.37775 | -0.57007 | 0.04345 |
| CLSTN2   | 0.07903  | 0.66053 | 0.00156  | 0.99453 |
| TMED8    | 0.37881  | 0.28157 | 1.77601  | 0.00000 |
| STC1     | 0.15079  | 0.58665 | 0.56740  | 0.02535 |
| MLLT1    | 0.24322  | 0.49048 | 0.11033  | 0.76054 |
| PDLIM5   | 0.00224  | 0.99359 | 1.03994  | 0.00053 |
| GLOD4    | 0.01197  | 0.93138 | 1.04713  | 0.00000 |
| DHODH    | 0.37046  | 0.19589 | 0.42384  | 0.12294 |
| EPHB6    | 0.12263  | 0.52831 | -0.15537 | 0.46502 |
| MICALL2  | 0.42896  | 0.15273 | 0.77715  | 0.00116 |
| TNFSF12  | 0.09539  | 0.47354 | -0.53445 | 0.03133 |
| SDK2     | -0.20962 | 0.12098 | -0.54529 | 0.00016 |
| CES1     | -0.20398 | 0.50412 | 0.12473  | 0.64379 |
| VAV3     | -0.45191 | 0.25410 | -0.66630 | 0.06240 |
| VWA1     | 0.16221  | 0.50666 | 0.27868  | 0.32533 |
| ABO      | -0.32031 | 0.51421 | -0.69432 | 0.13827 |
| TERF1    | -0.11999 | 0.60840 | 0.27403  | 0.25306 |
| LYPD3    | -0.22412 | 0.18759 | -0.19703 | 0.25604 |
| IL7      | -0.01108 | 0.96455 | -0.82511 | 0.00039 |
| PPM1A    | -0.26520 | 0.02699 | -0.08868 | 0.40165 |
| ERI1     | 0.28142  | 0.35367 | 0.42866  | 0.10739 |
| VAMP5    | 0.47186  | 0.17955 | 0.32195  | 0.28485 |
| HLA-DRA  | -0.15315 | 0.42702 | -0.90057 | 0.00001 |
| AKT1S1   | 0.39971  | 0.09627 | 1.86690  | 0.00000 |
| AP1G2    | -0.40367 | 0.24425 | -0.59587 | 0.07030 |
| SCG2     | 0.33098  | 0.03364 | 0.04074  | 0.84582 |
| CHMP1A   | 0.12559  | 0.59529 | 1.41667  | 0.00000 |
| EFCAB14  | 0.13582  | 0.32108 | -0.30722 | 0.01304 |
| IGHMBP2  | -0.31327 | 0.21421 | 0.38985  | 0.10105 |
| TGFB2    | 0.35066  | 0.06497 | -0.23513 | 0.17591 |

|         |          |         |          |         |
|---------|----------|---------|----------|---------|
| FES     | -0.67701 | 0.01278 | -0.50651 | 0.09288 |
| NGFR    | 0.16746  | 0.36155 | 0.06974  | 0.69387 |
| LRP11   | 0.22195  | 0.10189 | 0.16539  | 0.32344 |
| SPRR3   | 0.48848  | 0.09256 | 0.52101  | 0.03022 |
| RBM19   | 0.82343  | 0.00554 | 0.43383  | 0.12610 |
| SOD1    | 0.11298  | 0.54367 | 1.20984  | 0.00000 |
| TNFSF14 | 0.22332  | 0.48978 | -0.65529 | 0.04448 |
| DPP10   | 0.18481  | 0.49539 | -0.06423 | 0.79160 |
| PRAME   | 0.25957  | 0.02420 | -0.26345 | 0.03570 |
| GATD3   | -0.05318 | 0.90063 | 1.33471  | 0.00027 |
| CALB2   | 0.12207  | 0.72147 | 0.55002  | 0.10395 |
| PBLD    | 0.02671  | 0.93991 | 0.96589  | 0.00622 |
| PVR     | 0.17939  | 0.35481 | 0.16652  | 0.40529 |
| PSMD9   | -0.25362 | 0.25120 | 1.13401  | 0.00001 |
